# Supplementary material for: Aging-induced Changes in Sperm DNA Methylation are Modified by Low Dose of Perinatal Flame retardants
Source: Preprints.org preprint supplement (doi:10.20944/preprints202010.0641.v1), 2020-10-30
Supplement: Supplementary file 2 [file supplementary]

## Sheet: S1
Supplemental Table 1: Pyrosequencing primers and method validation for 6 control samples, PND120.
Closest gene	Primer type	Position of biotin	Primer sequence	# of CpG	% methylation RRBS	% methylation pyrosequencing (mean ± SD)
Ints6	Forward	B	AGATGGTAGAGGTGGAGGTATTA	6	0.21	1.92± 1.11
	Reverse		CCTAAACTAAAAAATTTCCTCTCAACTATC
	Sequencing		CTATCCAAAAAAAAACTCCCCATAA
Amn1	Forward		GGTTAGGGGAGGATTTATAGTTTTAGA	5	0.16	1.9± 0.79
	Reverse	B	ACCCCTACATTTTAAATACCAACTTATTCT
	Sequencing		AATTTAAATGAAGTTATAGGGAGT
Max	Forward		GGGAGATTATGGATTTAATGAGTAAGAA	6	0.16	3.5±2.39
	Reverse	B	AAACTCCCTCCCCTCCAATCCTATC
	Sequencing		GGATTAGGAAGGATAATGGGATTTT
Vps37a	Forward		TGGAAGGATTATTAATAGGAGGTAG	8	0.19	2.17±1.42
	Reverse	B	AACCCCAAAAAAATAAACTAACTCTTTCCC
	Sequencing		ATTTGGAATGGGAGTTT
Clcn7	Forward	B	ATTAATTGTTAGGGGTTTTAAGATTTAGGT	12	0.21	2.52±1.74
	Reverse		AACCATAACCCACTAAAAACCAAACTC
	Sequencing		AAACCAAACTCCACAA

## Sheet: S2
Supplemental Table 2. All significant DMRs (q < 0.05) with ≥ 10x coverage depth and ≥ 3 CpGs identified between PND65 and PND120 among control and/or BDE-47 exposed animals.
Chr	Start	End	# CpGs	Strand	Gene	DMR position in relation to gene	PND65 control	PND120 control	PND65 exposed	PND120 exposed	PND120 vs PND65 control difference	PND120 vs PND65 exposed difference	Window Length
chr1	1784439	1784541	5	+	Lats1	0	0.00520148	0.120582	0.0749747	0.0651238	11.5381	-0.985091	102
chr1	1885229	1885507	7	-	Ginm1	0	0.0067049	0.104731	0.0643567	0.0586667	9.80259	-0.569003	278
chr1	1885858	1885899	3	-	Ginm1	0	0.00612088	0.0960845	0.0663254	0.0616832	8.99636	-0.464219	41
chr1	2627071	2627133	6	-	Ust	0	0.0273575	0.104126	0.0811355	0.0680527	7.67686	-1.30828	62
chr1	2627239	2627381	6	-	Ust	0	0.0340745	0.119999	0.153236	0.163221	8.5925	0.998469	142
chr1	2949913	2950078	6	-	Sash1	0	0.00456888	0.0640418	0.0353387	0.0345634	5.9473	-0.0775275	165
chr1	4011210	4011434	5	-	Stxbp5	0	0.0666712	0.134739	0.0499978	0.0508004	6.80675	0.0802556	224
chr1	4653133	4653184	3	-	Rab32	0	0.0306478	0.155907	0.122369	0.111084	12.5259	-1.12846	51
chr1	5449067	5449228	4	+	Epm2a	0	0.0337921	0.124011	0.1146	0.122738	9.02185	0.813762	161
chr1	6970204	6970300	4	-	Utrn	-165	0.00468535	0.163888	0.0922389	0.0983089	15.9202	0.606994	96
chr1	6970399	6970518	6	-	Utrn	-360	0.00339879	0.119786	0.0839673	0.0828894	11.6387	-0.107788	119
chr1	7335651	7335771	8	-	Ltv1	0	0.0156432	0.123164	0.0782601	0.070187	10.7521	-0.807311	120
chr1	7633886	7659003	3	-	LOC103690919	0	0.0156504	0.158391	0.0580178	0.0431839	14.274	-1.48339	25117
chr1	7726263	7726446	5	+	Adat2	2	0.00515013	0.0951476	0.0579695	0.0522208	8.99974	-0.574869	183
chr1	8126815	8127144	5	+	LOC102551337	0	0.0236358	0.171681	0.105031	0.110693	14.8045	0.566194	329
chr1	8751510	8751581	4	-	Adgrg6	0	0.0051707	0.0791862	0.0402332	0.0424911	7.40155	0.225786	71
chr1	12202356	12202417	3	+	Mcc	-73508	0.00942748	0.0727679	0.0915762	0.0694124	6.33405	-2.21638	61
chr1	12823239	12823346	4	+	Cited2	18	0.00186354	0.149883	0.0882706	0.0704593	14.8019	-1.78113	107
chr1	13175269	13175361	6	-	Abracl	0	0.00445054	0.0788788	0.0472222	0.0458816	7.44282	-0.134059	92
chr1	14224707	14243539	10	+	Perp	0	0.479768	0.538481	0.516989	0.515706	5.87132	-0.128257	18832
chr1	14793982	14794093	3	+	Olig3	3674	0.0910033	0.206166	0.202446	0.198044	11.5163	-0.440158	111
chr1	15412610	15412709	7	+	Map3k5	0	0.00654032	0.0941856	0.0672343	0.0588473	8.76452	-0.8387	99
chr1	18057059	18057385	3	-	Ptprk	0	0.00224675	0.144707	0.163856	0.13974	14.2461	-2.41164	326
chr1	18057423	18057631	6	-	Ptprk	0	0.00449575	0.100094	0.0709132	0.0525208	9.55978	-1.83924	208
chr1	20332357	20332585	4	+	Tmem200a	0	0.00422709	0.0920353	0.0527587	0.0592679	8.78082	0.650916	228
chr1	21748243	21748296	6	+	Enpp1	0	0.00321861	0.0692437	0.0401545	0.032413	6.60251	-0.774152	53
chr1	23238249	23238315	3	+	Eya4	0	0.0694896	0.144796	0.341749	0.338347	7.53059	-0.340195	66
chr1	23858701	23858924	3	+	Tcf21	47794	0.0672323	0.147592	0.13438	0.0910785	8.03594	-4.33011	223
chr1	23977759	23977895	3	+	Tbpl1	0	0.00307196	0.0896057	0.0467751	0.0481468	8.65337	0.13717	136
chr1	25173226	25173289	4	+	Clvs2	0	0.0132685	0.0914411	0.0610195	0.0551925	7.81725	-0.582696	63
chr1	29191537	29225233	9	+	Hey2	0	0.140389	0.214778	0.230123	0.201257	7.43893	-2.88661	33696
chr1	29225725	29225778	5	+	Ncoa7	0	0.00681355	0.0753042	0.0479475	0.0461189	6.84907	-0.182866	53
chr1	30857295	30917934	5	+	Rnf146	0	0.154434	0.249572	0.287932	0.292233	9.51381	0.430166	60639
chr1	30918093	30918183	4	-	Echdc1	0	0.00452884	0.0871531	0.0388846	0.0469256	8.26243	0.804097	90
chr1	31124484	31165048	15	+	LOC100912444	41877	0.0296433	0.101331	0.0815367	0.0735157	7.1688	-0.802096	40564
chr1	31201302	31201322	3	+	LOC100912444	5603	0.00487013	0.129484	0.0846457	0.108668	12.4614	2.40218	20
chr1	31835098	31835189	4	+	Cep72	0	0.00531939	0.0914186	0.0674716	0.0571429	8.60993	-1.03287	91
chr1	31890464	31890645	4	-	Tppp	0	0.00443611	0.116517	0.0923086	0.0816961	11.2081	-1.06125	181
chr1	31890740	31890863	3	-	Tppp	0	0.0777713	0.184854	0.147956	0.131736	10.7083	-1.62206	123
chr1	32058180	32058428	3	+	Nkd2	0	0.087451	0.222961	0.149588	0.152765	13.551	0.317626	248
chr1	32364066	32364125	4	-	Slc6a3	-84	0.000677048	0.105575	0.0591255	0.0618268	10.4897	0.270128	59
chr1	32643368	32643419	3	-	Irx4	0	0.0574806	0.138378	0.117655	0.126305	8.08974	0.864986	51
chr1	32643627	32643665	3	-	Irx4	0	0.0155008	0.108916	0.0836944	0.0781185	9.34154	-0.557586	38
chr1	33276995	33277071	3	+	LOC103690947	485	0.00911398	0.138524	0.065815	0.0646491	12.941	-0.116588	76
chr1	33892806	33892937	4	+	Irx1	17976	0.290127	0.178748	0.194268	0.171927	-11.1379	-2.23407	131
chr1	33910947	33910999	3	+	Irx1	0	0.00609537	0.127656	0.0385283	0.0438911	12.156	0.536279	52
chr1	35280512	35280573	4	+	Ice1	0	0.0176978	0.108636	0.0808576	0.0746419	9.09387	-0.621575	61
chr1	36186413	36186499	4	+	Ube2ql1	0	0.00449227	0.113652	0.0866396	0.0713743	10.916	-1.52653	86
chr1	36388079	36399735	18	+	Papd7	322	0.27258	0.332361	0.288159	0.310693	5.97811	2.25336	11656
chr1	36400278	36400513	5	+	Papd7	0	0.119629	0.206057	0.111696	0.100948	8.64281	-1.07479	235
chr1	37818815	37842907	4	-	LOC680200	0	0.198465	0.333598	0.294532	0.264984	13.5133	-2.95486	24092
chr1	39811858	39811953	3	+	Ppp1r14c	0	0.00389632	0.123486	0.0749624	0.0640636	11.959	-1.08987	95
chr1	40816320	40816347	4	+	Akap12	0	0.00649351	0.0769643	0.0378929	0.0490176	7.04708	1.11247	27
chr1	40816480	40816576	4	+	Akap12	0	0.00365836	0.0972341	0.0585392	0.0665498	9.35757	0.801061	96
chr1	40816752	40816977	6	+	Akap12	0	0.0174276	0.116865	0.0858866	0.0804686	9.94376	-0.541801	225
chr1	42587582	42587810	4	-	Rgs17	0	0.00437318	0.161611	0.0748122	0.0722198	15.7238	-0.259246	228
chr1	43884164	43884192	3	-	Cnksr3	0	0.0034975	0.0949957	0.0603173	0.0550813	9.14982	-0.523603	28
chr1	44018441	44018654	5	+	Scaf8	313	0.00312262	0.0674802	0.0393808	0.0300603	6.43576	-0.932051	213
chr1	45799911	45800125	3	-	LOC102548409	3521	0.00410991	0.079119	0.0515497	0.0443609	7.50091	-0.718876	214
chr1	46740200	46740245	4	+	Snx9	39898	0.00709813	0.103903	0.0518223	0.0563783	9.68045	0.455601	45
chr1	46978047	46978097	3	-	Serac1	0	0.00453017	0.102881	0.0616607	0.0649325	9.83511	0.327181	50
chr1	47149287	47162305	8	+	Tmem181	90	0.0127705	0.135675	0.0655381	0.0562976	12.2904	-0.92405	13018
chr1	47942287	47942300	3	+	Wtap	201	0.00705476	0.0771084	0.0390476	0.0348851	7.00537	-0.416253	13
chr1	52992418	52992588	7	-	Prr18	0	0.00301584	0.0898141	0.0508229	0.0501814	8.67982	-0.0641461	170
chr1	52992651	53014361	4	-	Prr18	0	0.013293	0.103428	0.334904	0.323554	9.0135	-1.135	21710
chr1	53840771	53840976	3	-	Afdn	0	0.00221239	0.0861012	0.0344907	0.0271889	8.38888	-0.73018	205
chr1	56242585	56294398	5	+	Smoc2	0	0.146196	0.248142	0.0865714	0.0867611	10.1946	0.0189728	51813
chr1	56949520	56949726	3	-	Wdr27	0	0.0948739	0.172569	0.161108	0.171619	7.76953	1.05113	206
chr1	56949773	56949820	4	+	LOC100125364	0	0.0075173	0.128392	0.076818	0.0674534	12.0875	-0.936456	47
chr1	56950239	56982461	11	+	LOC100125364	0	0.219939	0.282906	0.35443	0.355815	6.2967	0.138585	32222
chr1	57326518	57327041	3	-	Dll1	0	0.00599154	0.12899	0.0552265	0.0633901	12.2998	0.816356	523
chr1	57327720	57328030	3	-	Dll1	-989	0.0448067	0.153472	0.100352	0.0972087	10.8665	-0.314343	310
chr1	57331597	57331864	5	-	Dll1	-4866	0.0343222	0.128595	0.107572	0.0811464	9.42728	-2.64252	267
chr1	57332034	57338099	6	-	Dll1	-5303	0.126872	0.212884	0.200118	0.195122	8.60114	-0.499599	6065
chr1	57518254	57518470	12	-	Pdcd2	0	0.0317594	0.106567	0.0791616	0.0875618	7.48079	0.840021	216
chr1	57814948	57814990	4	-	Rgmb	0	0.00464919	0.10402	0.0732984	0.0872937	9.93704	1.39952	42
chr1	61699515	61724559	3	+	LOC102553001	0	0.0159722	0.15474	0.103822	0.0905476	13.8767	-1.32743	25044
chr1	64146711	64146771	3	-	Cnot3	0	0.00383551	0.129775	0.0688238	0.0953117	12.5939	2.64879	60
chr1	64333751	64334480	8	-	Cacng8	0	0.00434015	0.116591	0.118853	0.100514	11.225	-1.83384	729
chr1	64406042	64408349	7	-	Prkcg	0	0.0403021	0.139499	0.0765747	0.0701944	9.91972	-0.638026	2307
chr1	65541230	65541493	3	+	Chmp2a	0	0.0148192	0.156507	0.150144	0.168934	14.1688	1.87901	263
chr1	65705538	65747278	5	-	Zfp110	0	0.487967	0.563041	0.482742	0.480522	7.5074	-0.222099	41740
chr1	65781835	65781892	3	+	Zfp329	0	0.0884672	0.194278	0.253769	0.24776	10.5811	-0.600909	57
chr1	66995603	67389860	24	+	Vom1r47	0	0.599669	0.681389	0.652692	0.668247	8.17193	1.5555	394257
chr1	67390052	67764919	7	-	LOC103690016	0	0.339967	0.386408	0.380904	0.440406	4.64408	5.95027	374867
chr1	72330912	72331026	6	-	Ccdc106	0	0.00445758	0.102701	0.0341702	0.0339493	9.82436	-0.0220897	114
chr1	72331155	72340375	15	-	Ccdc106	0	0.142704	0.222292	0.212547	0.223756	7.95879	1.12089	9220
chr1	72356928	72356994	5	+	Zfp865	0	0.0795365	0.146496	0.123222	0.10942	6.69593	-1.38013	66
chr1	72374635	72374768	6	-	LOC100911196	-114	0.114721	0.182157	0.0983164	0.0969865	6.74357	-0.132994	133
chr1	72379218	72379507	5	-	Zfp524	0	0.00854025	0.086484	0.133787	0.114127	7.79438	-1.96594	289
chr1	72380511	72399237	14	+	Fiz1	0	0.291127	0.4555	0.383713	0.487246	16.4372	10.3533	18726
chr1	72472925	72501588	21	-	Zfp628	0	0.645828	0.722236	0.745198	0.80778	7.64079	6.25822	28663
chr1	72522012	72524280	5	+	Isoc2b	224	0.466164	0.537957	0.483225	0.518937	7.17927	3.57128	2268
chr1	72524292	72524643	4	+	Isoc2b	0	0.00651807	0.09521	0.0490986	0.0508461	8.8692	0.17475	351
chr1	72524678	72524832	5	+	Isoc2b	0	0.0679934	0.163128	0.14827	0.141514	9.51348	-0.675569	154
chr1	72546721	72553342	8	+	Shisa7	0	0.213541	0.324856	0.299726	0.332364	11.1314	3.26374	6621
chr1	72553549	72553640	6	+	Shisa7	0	0.00422261	0.0738896	0.053923	0.0484644	6.9667	-0.545864	91
chr1	72621884	72624661	8	-	Rpl28	0	0.0336606	0.146267	0.113054	0.117554	11.2607	0.450039	2777
chr1	72625094	72625120	3	+	Tmem238	0	0.00611234	0.0739393	0.0650464	0.0548098	6.78269	-1.02366	26
chr1	72625133	72625157	4	+	Tmem238	0	0.00317466	0.0812881	0.0425197	0.0469455	7.81134	0.442584	24
chr1	72625197	72637028	8	+	Tmem238	0	0.240474	0.307319	0.301539	0.306663	6.6845	0.512408	11831
chr1	72637577	72637676	6	+	Il11	0	0.00602674	0.0636385	0.0649541	0.0649167	5.76118	-0.00374392	99
chr1	73722163	73733398	10	-	Leng8	0	0.517423	0.591417	0.598276	0.615321	7.39938	1.70451	11235
chr1	77994204	77994242	3	+	Napa	0	0.00497468	0.110136	0.0541493	0.0642565	10.5161	1.01072	38
chr1	77994262	77994358	7	+	Napa	0	0.00569349	0.0764345	0.0444939	0.0452515	7.0741	0.075755	96
chr1	78211816	78211854	3	-	Inafm1	0	0.00522229	0.191543	0.103293	0.106273	18.6321	0.298017	38
chr1	78264448	78333205	16	+	Bbc3	0	0.50237	0.640562	0.620527	0.759321	13.8192	13.8794	68757
chr1	78334324	78353465	3	+	Zc3h4	0	0.270435	0.512675	0.377764	0.439562	24.2239	6.17987	19141
chr1	78355238	78356011	6	+	Zc3h4	0	0.044089	0.127879	0.0921821	0.0851006	8.37895	-0.708149	773
chr1	78417727	78417933	4	+	Tmem160	0	0.00434783	0.103138	0.0678172	0.048012	9.87897	-1.98052	206
chr1	78671320	78671402	4	+	Ap2s1	0	0.0628807	0.150813	0.123054	0.118298	8.79323	-0.475585	82
chr1	78852101	78852471	4	-	Calm3	-474	0.00618964	0.0791111	0.0527831	0.0446362	7.29214	-0.814698	370
chr1	79871167	79898380	5	+	Mypop	0	0.300491	0.386962	0.446663	0.444413	8.64708	-0.225018	27213
chr1	79898402	79899251	5	+	Mypop	0	0.00561092	0.105589	0.0643695	0.0577546	9.99777	-0.66149	849
chr1	79899267	79899314	5	+	Mypop	0	0.00669719	0.0753113	0.0543358	0.0526774	6.86141	-0.165841	47
chr1	79899364	79899406	5	+	Mypop	0	0.00394594	0.129337	0.0732456	0.0652734	12.5391	-0.797219	42
chr1	79930086	79930223	8	-	Foxa3	0	0.0428211	0.123086	0.0864563	0.0892814	8.02647	0.282512	137
chr1	79930274	79930973	3	+	Sympk	0	0.00110166	0.158256	0.0851398	0.070817	15.7155	-1.43228	699
chr1	79931016	79931069	3	+	Sympk	0	0.00669892	0.141404	0.0715468	0.0843806	13.4705	1.28338	53
chr1	80000359	80000393	4	+	Six5	0	0.00258398	0.0720969	0.0436374	0.047571	6.95129	0.393362	34
chr1	80090505	80092640	3	+	Eml2	0	0.0358461	0.163129	0.116741	0.0983093	12.7283	-1.84321	2135
chr1	80100236	80125664	5	+	Eml2	0	0.422235	0.624969	0.489882	0.604099	20.2734	11.4218	25428
chr1	80125681	80128424	15	+	Gpr4	0	0.0693224	0.150058	0.130009	0.117835	8.07352	-1.21745	2743
chr1	80185530	80185747	3	-	Vasp	0	0.00785517	0.14202	0.0484897	0.0456987	13.4165	-0.279101	217
chr1	80185943	80186506	4	-	Vasp	0	0.00724874	0.112334	0.0667413	0.0764859	10.5085	0.974458	563
chr1	80192139	80192272	4	-	Ppm1n	0	0.00614137	0.0603338	0.140351	0.118705	5.41924	-2.16458	133
chr1	80195508	80203755	24	+	Rtn2	0	0.0657735	0.155076	0.135811	0.112071	8.9302	-2.37403	8247
chr1	80254073	80254114	4	+	Ercc1	2860	0.00689655	0.0715691	0.0378346	0.0392881	6.46725	0.145352	41
chr1	80254570	80270895	6	+	Ercc1	0	0.209555	0.339369	0.316969	0.323743	12.9814	0.677421	16325
chr1	80367262	80367550	5	-	Mark4	0	0.00340136	0.0763057	0.0347763	0.0313356	7.29043	-0.344077	288
chr1	80382774	80382840	4	+	Exoc3l2	0	0.00368774	0.0705174	0.0376984	0.0577787	6.68296	2.00803	66
chr1	80488031	80488126	4	+	Zfp296	0	0.00374087	0.0833189	0.0432515	0.0387269	7.9578	-0.452463	95
chr1	80515535	80515588	3	-	Clasrp	0	0.00257072	0.136259	0.0723956	0.0787798	13.3688	0.638421	53
chr1	80515614	80515668	5	-	Clasrp	0	0.00383693	0.0931959	0.0535333	0.0468899	8.9359	-0.664344	54
chr1	80544819	80544844	3	-	Relb	0	0.0069564	0.0834732	0.0418104	0.0389445	7.65168	-0.28659	25
chr1	80629863	80630156	3	-	Tomm40	0	0.00563328	0.149014	0.0637103	0.0636939	14.3381	-0.00164622	293
chr1	80666535	80666589	3	-	Nectin2	0	0.0351487	0.152702	0.0906384	0.0923117	11.7554	0.167331	54
chr1	80676896	80687874	3	-	Bcam	0	0.301144	0.44449	0.241705	0.329411	14.3346	8.77059	10978
chr1	80746484	80747102	5	-	Bcl3	-1399	0.10613	0.234993	0.195466	0.147033	12.8862	-4.84334	618
chr1	80835505	80835530	3	-	PVR	0	0.00532213	0.111213	0.0845304	0.0678456	10.5891	-1.66848	25
chr1	80920956	80944161	5	+	Zfp180	0	0.538875	0.657073	0.542418	0.56513	11.8198	2.27125	23205
chr1	81332152	81372864	35	+	Plaur	0	0.337705	0.392627	0.427775	0.444016	5.4922	1.62406	40712
chr1	81450151	81458232	17	+	Ethe1	0	0.212439	0.294038	0.188341	0.17014	8.15988	-1.82008	8081
chr1	81952254	81952400	3	+	Zfp574	0	0.0382664	0.160522	0.117007	0.0988256	12.2255	-1.81818	146
chr1	82049192	82074115	10	-	Dedd2	0	0.396083	0.454944	0.384688	0.374186	5.88618	-1.05013	24923
chr1	82120837	82120853	3	-	Erf	0	0.0329678	0.116771	0.0833333	0.0960212	8.38034	1.26879	16
chr1	82183829	82184767	3	+	Megf8	0	0.0113054	0.0785256	0.0349966	0.036385	6.72202	0.138834	938
chr1	82263903	82264399	4	+	LOC102549501	0	0.00196078	0.0917917	0.0608493	0.0759147	8.98309	1.50654	496
chr1	82414798	82420991	6	+	Atp5sl	0	0.305242	0.38598	0.348849	0.350124	8.07376	0.127464	6193
chr1	82481330	82482570	7	+	Tgfb1	0	0.00701993	0.083804	0.063921	0.0690871	7.67841	0.516608	1240
chr1	82546433	82546501	3	-	Hnrnpul1	0	0.00465862	0.104217	0.0558104	0.0501841	9.95585	-0.562628	68
chr1	83976406	83977165	3	-	Egln2	0	0.135429	0.258413	0.132948	0.142253	12.2984	0.930408	759
chr1	83977201	83977264	3	-	Egln2	0	0.00596457	0.178378	0.0929702	0.09256	17.2414	-0.0410241	63
chr1	84039916	84040080	3	-	Itpkc	0	0.00533046	0.0970854	0.0532746	0.0365415	9.17549	-1.67331	164
chr1	84040341	84040427	3	-	Itpkc	0	0.0546184	0.146767	0.0999388	0.0964242	9.21485	-0.351453	86
chr1	84148822	84149943	6	-	Ltbp4	0	0.0197963	0.137384	0.075168	0.0746122	11.7587	-0.0555798	1121
chr1	84173892	84176399	4	-	Sptbn4	0	0.0775656	0.18252	0.111703	0.110218	10.4954	-0.148521	2507
chr1	84220425	84220533	5	-	Sptbn4	0	0.00311605	0.0757056	0.0496851	0.0391531	7.25896	-1.0532	108
chr1	84220755	84220781	4	-	Sptbn4	0	0.0105507	0.0804096	0.0471388	0.0493011	6.98588	0.216232	26
chr1	84281366	84281424	3	+	Sertad3	0	0.00448486	0.172201	0.0575732	0.0342949	16.7716	-2.32783	58
chr1	84312789	84313165	10	+	Prx	0	0.00373251	0.0784146	0.0438517	0.0422812	7.46821	-0.157055	376
chr1	84470957	84491156	21	+	Ttc9b	0	0.133729	0.210299	0.197932	0.205381	7.65706	0.744828	20199
chr1	84491190	84491461	5	-	Map3k10	0	0.00313337	0.114766	0.0574549	0.0469484	11.1633	-1.05066	271
chr1	84899270	84922134	6	-	Zfp780b-ps1	0	0.138147	0.249839	0.172938	0.163467	11.1692	-0.947101	22864
chr1	85291368	85291654	5	-	Lrfn1	0	0.0312814	0.14791	0.080415	0.0680325	11.6629	-1.23824	286
chr1	85368806	85378394	7	+	Med29	0	0.0178648	0.074059	0.0436199	0.0508952	5.61942	0.727524	9588
chr1	85380290	85380328	3	+	Zfp36	0	0.00491271	0.11851	0.0760309	0.0849057	11.3597	0.887473	38
chr1	85386696	85386722	3	+	Plekhg2	0	0.0042735	0.113665	0.28877	0.344156	10.9391	5.53858	26
chr1	85387050	85387160	4	+	Plekhg2	0	0.00397718	0.133364	0.0950389	0.0904494	12.9387	-0.45895	110
chr1	85437964	85438055	3	+	Supt5h	0	0.00291151	0.147121	0.0898514	0.0806764	14.421	-0.917498	91
chr1	85471254	85486320	9	+	Timm50	0	0.203586	0.28163	0.252694	0.246947	7.8044	-0.574668	15066
chr1	85517390	85558921	11	-	Eid2	0	0.279667	0.338667	0.252492	0.25186	5.89998	-0.0632457	41531
chr1	85678383	85885850	6	-	LOC100911458	-103009	0.237081	0.31498	0.0446396	0.0405471	7.78985	-0.409252	207467
chr1	86914636	86914728	5	+	Fbxo17	0	0.00404204	0.0848364	0.0625793	0.0549613	8.07943	-0.761804	92
chr1	86921113	86923843	5	-	Mrps12	0	0.446466	0.630954	0.37931	0.401734	18.4488	2.24238	2730
chr1	87228552	87244757	36	+	Ppp1r14a	0	0.250015	0.327036	0.351769	0.371773	7.70212	2.00039	16205
chr1	87936571	87937040	3	-	Eif3k	0	0.0011199	0.130914	0.0836274	0.0770744	12.9794	-0.655301	469
chr1	87938608	87957152	8	+	Map4k1	0	0.633164	0.741044	0.766402	0.815456	10.788	4.90541	18544
chr1	88734118	88734229	4	-	Wdr62	0	0.00521534	0.122382	0.0600106	0.0588059	11.7167	-0.120465	111
chr1	88780443	88780521	3	-	LOC100912030	0	0.00649351	0.117089	0.0828292	0.0922177	11.0595	0.938852	78
chr1	88812380	88812431	4	-	Lrfn3	7009	0.00333363	0.135125	0.0980719	0.0974499	13.1792	-0.0622022	51
chr1	88907208	88908902	6	-	Aplp1	0	0.0184706	0.100591	0.0633364	0.0683886	8.21204	0.50522	1694
chr1	89007756	89017830	15	-	Proser3	0	0.0293559	0.14668	0.0927037	0.110077	11.7324	1.73731	10074
chr1	89084805	89091654	4	-	Cox6b1	0	0.0231118	0.105192	0.0589817	0.0637801	8.20803	0.479839	6849
chr1	89092619	89109141	8	-	Etv2	0	0.315831	0.404581	0.368959	0.364516	8.87494	-0.444338	16522
chr1	89382320	89382349	3	-	Usf2	0	0.00522725	0.0884932	0.055061	0.0485067	8.32659	-0.655429	29
chr1	89383314	89399141	14	+	LOC100909893	0	0.510626	0.594178	0.590928	0.621218	8.35516	3.02896	15827
chr1	89474044	89484937	3	-	Fxyd5	0	0.00518538	0.12219	0.0724876	0.0669051	11.7005	-0.558257	10893
chr1	90057677	90057705	3	-	Pdcd2l	0	0.00297619	0.0826387	0.0482301	0.0506668	7.96625	0.24367	28
chr1	90057796	90091140	22	-	Gpi	0	0.709459	0.764526	0.727469	0.736141	5.50676	0.86718	33344
chr1	90245638	90245732	8	-	Lsm14a	0	0.00292157	0.0822494	0.0538388	0.0478727	7.93278	-0.596611	94
chr1	91363733	91363780	3	+	Cebpa	0	0.049702	0.106792	0.061753	0.0484871	5.70897	-1.32659	47
chr1	91364418	91364738	5	+	Cebpa	0	0.0744217	0.162915	0.123192	0.111461	8.84931	-1.17309	320
chr1	91462617	91486269	5	-	Lrp3	0	0.365985	0.423562	0.476285	0.47249	5.75769	-0.379438	23652
chr1	92068887	92068931	4	-	Dpy19l3	0	0.00495651	0.0962763	0.0601755	0.0455285	9.13197	-1.46471	44
chr1	94003162	94003394	5	-	Zfp536	0	0.118345	0.18195	0.231873	0.221025	6.36051	-1.08476	232
chr1	94153534	94153580	4	-	Zfp536	0	0.0439072	0.11191	0.0927208	0.0809499	6.8003	-1.17709	46
chr1	94153590	94153657	3	-	Zfp536	0	0.0852566	0.186809	0.156673	0.14721	10.1552	-0.946229	67
chr1	94574355	94574449	3	+	LOC690000	0	0.00468353	0.14097	0.0818018	0.0784361	13.6286	-0.336567	94
chr1	98440438	98453387	12	+	Iglon5	0	0.269052	0.354893	0.431281	0.422968	8.58404	-0.831286	12949
chr1	98463947	98464007	4	-	Vsig10l	0	0.0247898	0.0835443	0.071563	0.0769806	5.87545	0.541761	60
chr1	98599338	98614859	3	+	Dzf17	0	0.0327271	0.104791	0.122601	0.0667889	7.2064	-5.58126	15521
chr1	100291493	100296798	3	-	Clec11a	0	0.0869971	0.145013	0.138073	0.106366	5.80163	-3.17072	5305
chr1	100297535	100298113	5	+	Shank1	0	0.104463	0.18438	0.105636	0.101983	7.99171	-0.365271	578
chr1	100338539	100338598	3	+	Shank1	0	0.00542233	0.185279	0.0751445	0.0658959	17.9857	-0.924861	59
chr1	100339009	100339030	3	+	Shank1	0	0.00458716	0.110561	0.0802951	0.0645492	10.5974	-1.5746	21
chr1	100339239	100343554	20	+	Shank1	0	0.167292	0.246304	0.201014	0.235034	7.90122	3.40202	4315
chr1	100434475	100434715	4	+	Lrrc4b	0	0.0474054	0.131668	0.0393719	0.0514342	8.42628	1.20623	240
chr1	100501262	100501462	3	-	Emc10	0	0.0838412	0.174541	0.143191	0.11882	9.07002	-2.43712	200
chr1	100590277	100590351	3	+	Napsa	-476	0.0213262	0.133017	0.0811795	0.0731265	11.169	-0.805303	74
chr1	100755065	100755597	4	-	Zfp473	0	0.0518427	0.225762	0.167817	0.151402	17.3919	-1.64145	532
chr1	100811958	100811973	3	+	Il4i1	0	0.00213675	0.121927	0.0589286	0.05625	11.9791	-0.267857	15
chr1	100844756	100846518	3	-	Tbc1d17	0	0.0033416	0.113316	0.0528403	0.0522616	10.9975	-0.0578648	1762
chr1	100887895	100891862	3	-	Med25	0	0.0925064	0.163016	0.0508997	0.0550476	7.05096	0.414796	3967
chr1	100926292	100926330	3	-	Ap2a1	0	0.00187276	0.109991	0.0643828	0.068084	10.8118	0.370114	38
chr1	100980817	101004070	46	-	Bcl2l12	0	0.80335	0.884562	0.810205	0.896319	8.12126	8.61148	23253
chr1	101159522	101159544	3	+	Slc17a7	1722	0.00475856	0.0727935	0.037624	0.0329387	6.80349	-0.468535	22
chr1	101173459	101178508	9	-	Gfy	0	0.100601	0.183217	0.0401741	0.0345065	8.2616	-0.566763	5049
chr1	101351990	101356726	3	-	Ppfia3	0	0.0143547	0.125918	0.205484	0.210648	11.1563	0.516382	4736
chr1	101360753	101388129	27	-	Lin7b	0	0.652242	0.739149	0.711425	0.760612	8.69072	4.91866	27376
chr1	101442664	101446085	15	+	Gys1	0	0.575795	0.667716	0.728441	0.833022	9.19217	10.458	3421
chr1	101514914	101514938	4	-	Ppp1r15a	0	0.0012012	0.0814125	0.0522972	0.0375561	8.02113	-1.47411	24
chr1	101515001	101515042	3	-	Ppp1r15a	0	0.0901113	0.154782	0.115719	0.114539	6.46711	-0.117984	41
chr1	101554731	101571024	12	+	Bcat2	0	0.390233	0.529985	0.53109	0.58539	13.9752	5.42994	16293
chr1	101683066	101687734	8	+	Car11	0	0.377296	0.456298	0.364715	0.406542	7.90017	4.18264	4668
chr1	101688426	101690008	5	+	Dbp	0	0.077353	0.173645	0.0979682	0.0932866	9.62917	-0.468158	1582
chr1	101859611	101883795	6	+	Kdelr1	0	0.0821187	0.210727	0.269492	0.269463	12.8608	-0.00290771	24184
chr1	101883868	101894342	3	-	Syngr4	0	0.214932	0.278255	0.00802139	0	6.33233	-0.802139	10474
chr1	102414731	102414768	3	+	Kcnc1	0	0.00231481	0.115738	0.0508273	0.0494491	11.3423	-0.137816	37
chr1	102415126	102415241	3	+	Kcnc1	0	0	0.103908	0.058615	0.0483923	10.3908	-1.02227	115
chr1	102415313	102415366	4	+	Kcnc1	0	0.00657387	0.0862342	0.0492238	0.0562639	7.96603	0.704012	53
chr1	102971053	102971079	3	-	Tsg101	-44	0.00671096	0.091263	0.064093	0.0561618	8.4552	-0.793114	26
chr1	103172898	103172969	3	+	Tmem86a	64	0.00228348	0.120908	0.0808783	0.0750777	11.8624	-0.580059	71
chr1	103173118	103173153	3	+	Tmem86a	0	0.00390145	0.110898	0.072	0.064	10.6997	-0.8	35
chr1	104203473	104203494	3	-	E2f8	0	0.00537596	0.088838	0.0410647	0.0451143	8.3462	0.404963	21
chr1	104973511	104974020	7	-	Dbx1	0	0.00676391	0.113401	0.0681219	0.0627747	10.6637	-0.53472	509
chr1	104976710	105004730	6	-	Dbx1	-3063	0.412026	0.510793	0.559929	0.560982	9.87674	0.105259	28020
chr1	114372349	114422475	6	-	Nipa1	0	0.127074	0.206602	0.1628	0.197247	7.95281	3.44464	50126
chr1	124654409	124654519	4	+	Otud7a	0	0.0692474	0.212961	0.165792	0.16448	14.3714	-0.13117	110
chr1	126979632	126979654	3	+	Vimp	0	0.00525352	0.0996217	0.046093	0.0619956	9.43682	1.59027	22
chr1	126979796	126979878	3	+	Vimp	0	0.00510485	0.125281	0.0967338	0.0817439	12.0176	-1.49899	82
chr1	127298406	127298467	3	-	Lrrk1	0	0.00215054	0.0854258	0.036886	0.0355031	8.32753	-0.138293	61
chr1	127598946	127600004	9	-	Asb7	0	0.00440418	0.0658352	0.074733	0.0673385	6.1431	-0.739452	1058
chr1	128171594	128199031	3	+	Lysmd4	83	0.078325	0.194877	0.0698821	0.0587246	11.6552	-1.11575	27437
chr1	128341765	128374006	3	-	Mef2a	-503	0.277933	0.302301	0.478022	0.346154	2.43686	-13.1868	32241
chr1	128720769	128721269	4	-	Synm	0	0.0093461	0.128939	0.0898415	0.0768765	11.9593	-1.2965	500
chr1	131379064	131397072	16	-	LOC102553173	0	0.426579	0.480783	0.448685	0.441302	5.42045	-0.738296	18008
chr1	131454641	131455161	5	-	Nr2f2	0	0.0376405	0.123906	0.0965599	0.0778248	8.62654	-1.87352	520
chr1	134698488	134699036	4	+	Rgma	18	0.00980501	0.12284	0.0624	0.0583613	11.3035	-0.403869	548
chr1	134699065	134699137	5	+	Rgma	0	0.00613241	0.105104	0.0244378	0.0252457	9.89715	0.080791	72
chr1	134699236	134706611	7	+	Rgma	0	0.251698	0.322804	0.24875	0.245356	7.11061	-0.339404	7375
chr1	134887308	134887405	3	-	Chd2	-14263	0.00364551	0.162927	0.107924	0.104112	15.9281	-0.38123	97
chr1	134954961	134955150	7	+	LOC499179	36785	0.00373516	0.092502	0.0526254	0.0469293	8.87668	-0.569604	189
chr1	135405821	135405906	3	-	St8sia2	0	0.0069351	0.110557	0.0976418	0.0747407	10.3622	-2.29011	85
chr1	140584348	140584456	5	+	Aen	0	0.083934	0.16956	0.148897	0.134993	8.56264	-1.39036	108
chr1	140860812	140860859	3	-	Mfge8	0	0.00392211	0.0932417	0.0397707	0.0498016	8.93196	1.0031	47
chr1	141188927	141189429	3	+	Trnar-ucg	0	0.00243934	0.149371	0.0983276	0.0989375	14.6932	0.0609912	502
chr1	141189608	141220560	8	+	LOC685596	0	0.276974	0.38739	0.403494	0.405878	11.0416	0.238447	30952
chr1	141229126	141229200	3	+	LOC102555346	0	0.00566672	0.13778	0.108619	0.0969163	13.2114	-1.17022	74
chr1	141264403	141268121	6	+	LOC102555346	-5944	0.351435	0.455846	0.391981	0.380816	10.4411	-1.11649	3718
chr1	141452389	141459391	5	-	Kif7	0	0.00638835	0.130938	0.0720096	0.0628925	12.455	-0.911711	7002
chr1	141533072	141533126	3	-	Mesp1	0	0.00343288	0.130615	0.0813237	0.075629	12.7182	-0.569474	54
chr1	141533203	141536435	4	-	Mesp1	0	0.23145	0.32403	0.282266	0.280726	9.25805	-0.154059	3232
chr1	141893671	141893728	3	-	Idh2	0	0.107736	0.182576	0.176099	0.13604	7.48405	-4.00585	57
chr1	142060870	142060966	3	+	Vps33b	0	0.00888635	0.198774	0.0976369	0.0786441	18.9888	-1.89928	96
chr1	142086862	142086947	4	+	Prc1	250	0.00541059	0.0893546	0.0605422	0.0568901	8.3944	-0.365215	85
chr1	142087012	142087150	3	+	Prc1	47	0.00444572	0.0795024	0.0310202	0.0299959	7.50567	-0.102422	138
chr1	142087560	142114318	7	+	Prc1	0	0.278985	0.355382	0.262385	0.350349	7.63964	8.79635	26758
chr1	142163854	142163920	4	-	Man2a2	0	0.00315208	0.0689499	0.0972644	0.1058	6.57978	0.853545	66
chr1	142164451	142197550	32	-	Fes	0	0.532362	0.590908	0.57832	0.581152	5.85455	0.283128	33099
chr1	142332127	142332483	3	-	Blm	0	0.00344933	0.128762	0.0487621	0.0511004	12.5313	0.233836	356
chr1	142353924	142355379	3	-	Blm	-21312	0.585262	0.519046	0.435286	0.373764	-6.6216	-6.15218	1455
chr1	142500116	142500152	5	-	Crtc3	0	0.00522928	0.0734438	0.0465236	0.0399917	6.82145	-0.653194	36
chr1	142720098	142733893	4	-	Wdr73	0	0.278629	0.397001	0.360959	0.357806	11.8371	-0.315213	13795
chr1	142815105	142815171	3	+	Zfp592	18829	0.00936852	0.165788	0.119703	0.114412	15.642	-0.529099	66
chr1	143277730	143277821	7	-	Cpeb1	0	0.0097402	0.0780915	0.0512601	0.044482	6.83513	-0.677806	91
chr1	143278103	143278199	5	-	Cpeb1	0	0.039216	0.150652	0.109425	0.10786	11.1436	-0.156458	96
chr1	143278570	143278621	4	-	Cpeb1	-86	0.00640741	0.0788598	0.0464728	0.0460787	7.24524	-0.0394096	51
chr1	143646749	143646777	4	-	Btbd1	0	0.00136612	0.0735541	0.0518087	0.036141	7.2188	-1.56677	28
chr1	143818985	143819070	5	-	Bnc1	-280	0.0062646	0.119197	0.0806936	0.0715425	11.2932	-0.915114	85
chr1	143819236	143819355	4	-	Bnc1	-531	0.0083525	0.097645	0.0680994	0.0595328	8.92925	-0.856652	119
chr1	144601405	144601475	3	+	Efl1	0	0.0409077	0.148886	0.134536	0.116863	10.7978	-1.76734	70
chr1	144831341	144831513	3	+	Mex3b	11	0.0453551	0.186696	0.132635	0.149143	14.134	1.6508	172
chr1	144831760	144832080	3	+	Mex3b	0	0.108965	0.224471	0.176106	0.165867	11.5506	-1.02396	320
chr1	144832192	144832454	4	+	Mex3b	0	0.00606486	0.123752	0.0746757	0.0649742	11.7687	-0.970149	262
chr1	146030067	146030268	3	-	Mesdc1	-228	0.0539044	0.160626	0.151706	0.124765	10.6722	-2.69405	201
chr1	146030302	146030353	4	-	Mesdc1	-463	0.0013947	0.0913509	0.0587484	0.0616939	8.99562	0.294554	51
chr1	146030661	146030723	3	-	Mesdc1	-822	0.0497209	0.110249	0.0788049	0.0756553	6.05281	-0.314958	62
chr1	146030770	146030848	5	-	Mesdc1	-931	0.0747882	0.188373	0.167953	0.165598	11.3585	-0.235507	78
chr1	146288887	146288913	4	-	Abhd17c	0	0.00413892	0.0819435	0.0522111	0.0548346	7.78046	0.262351	26
chr1	146556624	146659581	7	-	Arnt2	0	0.00914444	0.0942161	0.0591542	0.0519523	8.50716	-0.720198	102957
chr1	147021501	147021564	3	+	F8a1	0	0.00126183	0.071996	0.0340106	0.0314271	7.07342	-0.258352	63
chr1	148442388	148442644	8	+	LOC103691184	0	0.0112954	0.17196	0.107507	0.107349	16.0665	-0.015803	256
chr1	148449697	148450148	22	-	LOC103691185	0	0.00522609	0.0760614	0.063646	0.0612861	7.08353	-0.235988	451
chr1	150797243	151631035	11	+	Nox4	0	0.341344	0.439625	0.410791	0.413632	9.82806	0.284084	833792
chr1	151782987	151785932	5	+	Grm5	0	0.127003	0.248236	0.291194	0.301301	12.1233	1.0107	2945
chr1	152073038	152098301	5	+	Rab38	0	0.523073	0.663045	0.557633	0.660289	13.9972	10.2656	25263
chr1	153740800	153740862	5	-	Prss23	0	0.00433927	0.0797041	0.0401774	0.0314406	7.53648	-0.873684	62
chr1	153741216	153741274	4	-	Prss23	-312	0.101665	0.153831	0.127408	0.117841	5.21657	-0.95665	58
chr1	154377347	154377365	3	+	Picalm	0	0.00140449	0.117928	0.122865	0.0968254	11.6524	-2.60396	18
chr1	154377405	156079128	30	+	Picalm	0	0.315046	0.380863	0.333356	0.358529	6.58173	2.51734	1701723
chr1	156295101	156295158	3	-	Crebzf	0	0.005604	0.129252	0.0916985	0.0915077	12.3648	-0.0190841	57
chr1	157494627	157573150	3	+	LOC680479	0	0.00357844	0.204326	0.26598	0.262424	20.0748	-0.355631	78523
chr1	157921363	157921405	3	+	Fam181b	0	0.164192	0.240413	0.212304	0.203903	7.62206	-0.840068	42
chr1	157921607	157921680	3	+	Fam181b	0	0.00567376	0.101224	0.0637444	0.0649826	9.55501	0.12382	73
chr1	161183936	161184275	13	+	Mir708	36972	0.0153815	0.0993047	0.073377	0.074761	8.39232	0.138409	339
chr1	161184297	161184408	4	+	Mir708	36839	0.0515	0.184927	0.138103	0.130346	13.3427	-0.775671	111
chr1	161184598	161185375	9	+	Mir708	35872	0.00418566	0.0999493	0.0656428	0.0557931	9.57637	-0.984971	777
chr1	162550103	162675894	7	+	Rsf1	0	0.00486411	0.132562	0.0977846	0.0939779	12.7698	-0.380667	125791
chr1	162676577	162687420	3	+	Clns1a	0	0.393038	0.530044	0.419019	0.51115	13.7006	9.21305	10843
chr1	163151481	163263059	4	-	Acer3	0	0.112935	0.211156	0.0939118	0.0720103	9.82202	-2.19014	111578
chr1	163263284	163263532	3	-	Acer3	0	0.139173	0.240125	0.191063	0.190436	10.0953	-0.0627138	248
chr1	163796991	163797905	4	+	Wnt11	0	0.007032	0.0889724	0.086293	0.0646993	8.19404	-2.15937	914
chr1	164101229	164101258	4	-	Uvrag	0	0.00753929	0.0637565	0.0281693	0.0361272	5.62172	0.795787	29
chr1	164101375	164101440	5	-	Uvrag	0	0.0051918	0.0738605	0.0518453	0.0399913	6.86687	-1.1854	65
chr1	164101559	164101630	3	-	Uvrag	0	0.000672043	0.104677	0.0690585	0.0522311	10.4005	-1.68274	71
chr1	164226614	164226773	3	+	Map6	0	0.0023748	0.149888	0.10156	0.083262	14.7513	-1.82983	159
chr1	164307753	164308053	3	-	Serpinh1	0	0.0652302	0.167344	0.139286	0.112155	10.2114	-2.71302	300
chr1	164308190	164337349	14	-	Serpinh1	0	0.0878047	0.178456	0.14469	0.139495	9.06517	-0.519474	29159
chr1	164337353	164337395	3	+	Gdpd5	0	0.000643087	0.0872236	0.0572355	0.0563218	8.65805	-0.0913674	42
chr1	165043067	165043615	11	+	Chrdl2	-6637	0.0763159	0.135556	0.14212	0.114581	5.92402	-2.75391	548
chr1	165122340	165170668	5	-	Pold3	0	0.515546	0.605413	0.779669	0.799937	8.98671	2.0268	48328
chr1	165171010	165171037	4	+	Lipt2	0	0.00677097	0.06855	0.0465038	0.0368908	6.1779	-0.961297	27
chr1	165238253	165295838	10	+	Pgm2l1	0	0.344699	0.418035	0.406082	0.398383	7.33359	-0.769922	57585
chr1	165382117	165382231	7	-	Ppme1	0	0.00499033	0.0879479	0.0549652	0.0596698	8.29576	0.470463	114
chr1	165535150	165541519	4	+	LOC103691200	0	0.625479	0.699679	0.621756	0.608922	7.42005	-1.28345	6369
chr1	165625577	165625602	3	+	Rab6a	0	0	0.0841663	0.0461538	0.04147	8.41663	-0.468389	25
chr1	165901466	165901582	5	-	Relt	0	0.00527652	0.0790568	0.0377742	0.0347633	7.37803	-0.30109	116
chr1	166739764	166739806	3	+	Clpb	0	0.0139718	0.104759	0.0755345	0.0734734	9.07876	-0.206105	42
chr1	166739818	166739897	4	+	Clpb	0	0.000568828	0.149453	0.0964372	0.0850267	14.8884	-1.14105	79
chr1	166981732	166981821	4	+	Anapc15	0	0.0564446	0.214828	0.161501	0.168508	15.8384	0.700631	89
chr1	167348453	167373724	5	+	Stim1	171	0.145909	0.284958	0.257581	0.241865	13.9048	-1.57157	25271
chr1	170464273	170464292	3	-	Trim3	0	0.00304569	0.0784882	0.0635473	0.0519127	7.54425	-1.16345	19
chr1	171592359	171592451	4	+	LOC100912015	0	0.00296318	0.0865514	0.0555565	0.0577989	8.35882	0.224236	92
chr1	173763852	173764040	4	-	Lmo1	0	0.0588446	0.169351	0.0791363	0.0800342	11.0506	0.089792	188
chr1	174331103	174378731	21	+	Akip1	0	0.36191	0.427735	0.437351	0.444682	6.58248	0.733098	47628
chr1	174379143	174379216	3	-	Tmem9b	0	0.00332413	0.116607	0.0714322	0.0449113	11.3283	-2.6521	73
chr1	174494985	174495084	6	-	Scube2	0	0.0085927	0.0898098	0.076737	0.0744826	8.12171	-0.225439	99
chr1	174588189	174588211	3	-	Dennd5a	0	0.132433	0.216567	0.158039	0.177138	8.41335	1.9099	22
chr1	174767967	174768057	4	+	Wee1	0	0.00453688	0.128377	0.0797479	0.0727987	12.384	-0.694922	90
chr1	174768681	174808140	8	+	Wee1	0	0.464877	0.608753	0.664891	0.698676	14.3876	3.37845	39459
chr1	175586726	175586789	3	+	Ampd3	0	0.0338545	0.149959	0.0880014	0.0964361	11.6105	0.843463	63
chr1	175839292	175839541	3	+	Ctr9	0	0.00291114	0.0945871	0.0527759	0.0459785	9.1676	-0.679737	249
chr1	175941409	175990357	5	-	LOC103691207	0	0.657072	0.720081	0.364777	0.362493	6.30091	-0.228412	48948
chr1	176829606	176854653	6	+	Usp47	0	0.31108	0.400186	0.288844	0.295626	8.91053	0.678228	25047
chr1	176855171	176855214	3	+	Usp47	0	0.00308748	0.117704	0.0866108	0.0804645	11.4617	-0.614633	43
chr1	177048749	177048817	4	+	Mical2	0	0.036951	0.119367	0.0833335	0.0821381	8.24156	-0.119538	68
chr1	177764151	177764504	11	+	Rassf10	0	0.00518021	0.102288	0.0720467	0.0616731	9.71077	-1.03736	353
chr1	178039625	178039791	6	+	Arntl	0	0.00622507	0.0849976	0.0321142	0.0302514	7.87725	-0.186273	166
chr1	178039816	178039932	3	+	Arntl	0	0.0762874	0.189718	0.113554	0.10645	11.343	-0.710446	116
chr1	178196552	178196593	3	-	Btbd10	-2	0.00748406	0.106788	0.0639246	0.0565015	9.93036	-0.74231	41
chr1	178196744	178196804	5	-	Btbd10	-194	0.00296825	0.0629187	0.0569026	0.0440622	5.99505	-1.28404	60
chr1	178351613	178351690	3	+	Far1	0	0.00215203	0.12533	0.0588938	0.055285	12.3177	-0.360876	77
chr1	183893091	183893129	4	+	Pde3b	0	0.00438228	0.0910061	0.0643593	0.0676471	8.66238	0.328771	38
chr1	184106187	184188654	3	-	Cyp2r1	0	0.369722	0.486331	0.442268	0.427535	11.6609	-1.47335	82467
chr1	185633987	185634019	3	+	Sox6	39159	0.00472513	0.0973837	0.0615214	0.0657038	9.26586	0.418236	32
chr1	185634086	185634202	4	+	Sox6	38976	0.00594311	0.108456	0.0856551	0.0667771	10.2513	-1.8878	116
chr1	187766683	187779439	3	-	Rps15a	0	0.00483032	0.12224	0.0647505	0.0741388	11.7409	0.938828	12756
chr1	188101611	188102108	3	-	Syt17	-355	0.112765	0.219482	0.215797	0.190683	10.6716	-2.51143	497
chr1	188142980	188143050	3	-	Itpripl2	-233	0.00134177	0.0901121	0.0488939	0.0434522	8.87704	-0.544163	70
chr1	189665871	189666277	5	+	Lyrm1	0	0.0567602	0.161002	0.0691703	0.0395833	10.4242	-2.9587	406
chr1	190852961	190853086	6	+	Polr3e	0	0.0763768	0.150539	0.14527	0.132409	7.41624	-1.28604	125
chr1	190964775	190965125	4	+	Mettl9	0	0.00401003	0.0905631	0.143836	0.109231	8.65531	-3.46042	350
chr1	192025568	192025646	3	+	Ubfd1	0	0.00198039	0.16336	0.112171	0.0892242	16.1379	-2.29467	78
chr1	192932633	192932718	9	+	Rbbp6	0	0.00773916	0.0670435	0.0394352	0.040885	5.93044	0.144984	85
chr1	193076261	193076296	3	+	Tnrc6a	0	0.00940184	0.119692	0.145062	0.136364	11.029	-0.869809	35
chr1	196839954	196871226	8	+	Kdm8	0	0.711733	0.76331	0.808458	0.807722	5.15774	-0.0736264	31272
chr1	196942446	196942575	6	+	Il4r	0	0.00477276	0.103159	0.0617348	0.0715367	9.83862	0.980184	129
chr1	197590422	197590471	3	-	Xpo6	-41	0.00342666	0.160015	0.0971429	0.0681818	15.6589	-2.8961	49
chr1	197658999	197659016	3	+	Sbk1	98	0.00562283	0.105295	0.0757009	0.0734033	9.96723	-0.229761	17
chr1	197778116	197778412	3	-	Spns1	0	0.00720824	0.133897	0.0696601	0.0653692	12.6688	-0.429096	296
chr1	197880392	197886692	5	-	Sh2b1	0	0.392379	0.49687	0.415666	0.414305	10.4492	-0.136045	6300
chr1	197903830	197903886	3	+	Tufm	0	0.00405034	0.117059	0.0686383	0.0693973	11.3009	0.0758996	56
chr1	198120123	198120153	3	+	RGD1565363	0	0.00598853	0.0931652	0.0563896	0.044964	8.71767	-1.14256	30
chr1	198120396	198120445	3	+	RGD1565363	0	0.00293375	0.0946391	0.0625445	0.0547662	9.17053	-0.777834	49
chr1	198225994	198231007	8	-	Aldoa	0	0.514675	0.650678	0.533773	0.607567	13.6003	7.3794	5013
chr1	198233012	198243984	13	-	Aldoa	0	0.125547	0.210757	0.164749	0.175014	8.52095	1.02648	10972
chr1	198264906	198283559	12	+	Fam57b	0	0.452426	0.55188	0.490098	0.565842	9.94535	7.57439	18653
chr1	198320239	198320710	4	-	Taok2	0	0.0331065	0.17662	0.11735	0.117421	14.3514	0.00701022	471
chr1	198360756	198360776	3	+	Kctd13	0	0.00593676	0.092144	0.0456596	0.0460588	8.62072	0.0399235	20
chr1	198459787	198476121	3	-	Maz	0	0.0625345	0.186182	0.119271	0.114562	12.3648	-0.470995	16334
chr1	198639280	198642398	3	-	Cd2bp2	0	0.512491	0.616214	0.0635302	0.0680459	10.3723	0.451573	3118
chr1	198690318	198690337	3	+	Zfp771	0	0.00154321	0.0698026	0.085	0.0643564	6.82593	-2.06436	19
chr1	198706822	198721048	7	-	Dctpp1	0	0.00517651	0.0944458	0.0971209	0.0992368	8.92693	0.211584	14226
chr1	198794954	198795314	5	-	Znf768	0	0.0768725	0.160728	0.0779617	0.0700485	8.38558	-0.791316	360
chr1	198831712	198838811	5	-	Zfp764	0	0.276576	0.350565	0.17643	0.159956	7.39886	-1.64739	7099
chr1	198910999	198911179	3	+	Prr14	64	0.00476822	0.182169	0.0937699	0.0865999	17.7401	-0.716991	180
chr1	198911217	198925870	15	+	Fbrs	0	0.104566	0.179898	0.148878	0.148155	7.53322	-0.0722586	14653
chr1	198926445	198926561	4	+	Fbrs	0	0.00619355	0.147462	0.104847	0.0930538	14.1268	-1.17929	116
chr1	199036780	199037515	4	-	Ccdc189	0	0.0600202	0.147023	0.0775234	0.076865	8.70032	-0.0658394	735
chr1	199063825	199063881	3	-	Zfp629	0	0.0698357	0.126525	0.103898	0.103009	5.66889	-0.0888592	56
chr1	199064231	199083641	6	-	Zfp629	0	0.0963511	0.207398	0.143133	0.14052	11.1047	-0.261307	19410
chr1	199196036	199211068	14	+	Fbxl19	0	0.565457	0.677821	0.635476	0.705757	11.2364	7.02809	15032
chr1	199288451	199320898	6	+	Stx4	0	0.402757	0.558141	0.561669	0.629073	15.5385	6.74036	32447
chr1	199413238	199413440	3	+	Fus	0	0.0705563	0.199026	0.0737209	0.068232	12.847	-0.548893	202
chr1	199865804	199865921	4	-	Tial1	0	0.00364026	0.104784	0.0657469	0.0567773	10.1143	-0.896955	117
chr1	200696161	200696359	5	-	Fgfr2	0	0.00317328	0.0943777	0.0450986	0.0520068	9.12044	0.69082	198
chr1	202771106	202771147	3	+	Wdr11	0	0	0.0791973	0.075947	0.0656221	7.91973	-1.03249	41
chr1	203508807	203508886	3	+	Hmx3	846	0.00632865	0.161691	0.104376	0.10071	15.5363	-0.366631	79
chr1	203509054	203509672	9	+	Hmx3	60	0.0121553	0.153557	0.108648	0.106895	14.1401	-0.17534	618
chr1	203509899	203510108	3	+	Hmx3	0	0.098744	0.229481	0.183616	0.173154	13.0737	-1.04623	209
chr1	203519248	203519340	3	+	Hmx2	0	0.011572	0.096732	0.0686426	0.0545509	8.51601	-1.40917	92
chr1	203521344	203521544	4	+	Hmx2	0	0.00948391	0.0804992	0.043097	0.0335515	7.10153	-0.954558	200
chr1	203522737	203523767	4	+	Hmx2	0	0.0570436	0.12319	0.0895335	0.0969636	6.61468	0.743016	1030
chr1	204320844	204320979	7	-	Chst15	0	0.00457071	0.12115	0.0562924	0.0538389	11.6579	-0.245345	135
chr1	204557487	204581984	5	-	Oat	0	0.00914422	0.0950078	0.0638505	0.0560604	8.58636	-0.779006	24497
chr1	204603634	204603652	3	-	Nkx1-2	0	0.00681281	0.138229	0.00825083	0.00502513	13.1416	-0.32257	18
chr1	204604300	204617887	11	-	Nkx1-2	0	0.0447	0.11689	0.103361	0.0754323	7.21904	-2.79288	13587
chr1	205841803	205842054	5	-	Dhx32	0	0.00475558	0.115032	0.102572	0.0962403	11.0277	-0.633218	251
chr1	206279615	206279700	7	-	LOC103691251	1483	0.00860776	0.0851599	0.0551787	0.0595468	7.65521	0.436817	85
chr1	206900973	206901125	5	+	Dock1	0	0.00611681	0.100189	0.0712465	0.0694501	9.40725	-0.179636	152
chr1	207171646	207171677	4	-	Fam196a	0	0.00366141	0.0916355	0.0557823	0.0546623	8.79741	-0.111996	31
chr1	209636619	209636665	3	-	Ebf3	0	0.00789819	0.0966946	0.0810583	0.0649458	8.87964	-1.61126	46
chr1	209748871	209748945	6	-	LOC100362342	0	0.00598598	0.106762	0.0616838	0.053067	10.0776	-0.861678	74
chr1	211264986	211293074	7	-	Bnip3	0	0.0154651	0.120225	0.0811337	0.07512	10.4759	-0.601366	28088
chr1	211293601	211293798	8	+	Jakmip3	0	0.00443176	0.0970028	0.0563212	0.0510797	9.25711	-0.524145	197
chr1	211293822	211294014	3	+	Jakmip3	0	0.00668832	0.182073	0.118394	0.0966713	17.5384	-2.17226	192
chr1	211543756	211543848	3	+	Lrrc27	0	0.00543178	0.117416	0.0664961	0.0593701	11.1984	-0.712604	92
chr1	211581863	211581938	4	+	Pwwp2b	0	0.0299544	0.101714	0.0706059	0.0716675	7.17599	0.106155	75
chr1	211581960	211581989	3	+	Pwwp2b	0	0.00886809	0.112469	0.0653686	0.0578014	10.3601	-0.756726	29
chr1	211923970	211924058	3	-	Nkx6-2	-42	0.00795072	0.0801477	0.0601999	0.0456397	7.2197	-1.45602	88
chr1	212281190	212281294	7	+	Utf1	0	0.00476599	0.0869956	0.0601892	0.0615704	8.22297	0.138128	104
chr1	212313718	212317328	5	-	LOC103691261	0	0.412677	0.474428	0.442548	0.446982	6.17514	0.443428	3610
chr1	212526270	212530102	5	-	LOC102551319	0	0.027002	0.147126	0.0830373	0.0819665	12.0124	-0.107076	3832
chr1	212560322	212595035	11	+	Prap1	0	0.292116	0.388428	0.301844	0.315551	9.63123	1.37073	34713
chr1	213606462	213606733	4	-	Bet1l	0	0.0014611	0.119788	0.0565709	0.0531826	11.8327	-0.338828	271
chr1	213870507	213870580	4	+	B4galnt4	0	0.00270918	0.0680649	0.0433418	0.0388086	6.53557	-0.453322	73
chr1	214181571	214181596	3	-	Hras	0	0.00465126	0.120092	0.00490196	0	11.5441	-0.490196	25
chr1	214208405	214208682	5	-	Mir210	0	0.0270978	0.154793	0.103881	0.103116	12.7695	-0.0765275	277
chr1	214255102	214255561	8	-	Cdhr5	0	0.080381	0.198063	0.0973912	0.0954158	11.7682	-0.197539	459
chr1	215010850	215010985	8	-	Dusp8	19445	0.0124291	0.0926533	0.0782682	0.0590363	8.02242	-1.92319	135
chr1	215553482	215553515	3	-	Ctsd	-37	0.00588531	0.0796414	0.0449695	0.0393257	7.3756	-0.564386	33
chr1	216155740	216156139	3	-	Ascl2	0	0.00577664	0.0998525	0.0650685	0.0794448	9.40758	1.43763	399
chr1	216237748	216238021	3	+	Cd81	0	0.0233811	0.183535	0.0792338	0.0847929	16.0154	0.555913	273
chr1	216238094	216238126	3	+	Cd81	0	0	0.112689	0.0739221	0.0628594	11.2689	-1.10627	32
chr1	216702735	216703044	3	-	Phlda2	0	0.0972116	0.202007	0.136437	0.141991	10.4795	0.555348	309
chr1	216919064	216919151	3	-	Osbpl5	0	0.0110469	0.110083	0.0702173	0.0683526	9.90361	-0.186476	87
chr1	217149854	217150105	9	+	Shank2	23095	0.00251856	0.0887099	0.0748236	0.0632893	8.61913	-1.15343	251
chr1	217721431	217748109	5	+	LOC100364769	0	0.431875	0.485398	0.0989583	0.0604244	5.35235	-3.85339	26678
chr1	218025639	218025715	6	+	Fgf4	0	0.00724365	0.0950259	0.0570861	0.0569012	8.77822	-0.0184907	76
chr1	218101741	218102215	8	-	Ccnd1	-1295	0.00453228	0.105287	0.0563476	0.0410268	10.0754	-1.53207	474
chr1	218657994	218658030	4	-	Gal	-73	0.01126	0.0823365	0.0646945	0.0477983	7.10765	-1.68962	36
chr1	218955982	218956425	3	+	RGD1311946	-1709	0.0890447	0.183789	0.179978	0.180179	9.47439	0.020059	443
chr1	219247760	219247808	3	+	Nudt8	0	0.004329	0.139153	0.0944964	0.0932646	13.4824	-0.123179	48
chr1	219345669	219345800	3	+	Cdk2ap2	0	0.0036289	0.186239	0.115789	0.0822958	18.261	-3.34936	131
chr1	219345838	219348606	8	+	Cdk2ap2	0	0.0189636	0.108804	0.0735839	0.0826744	8.98407	0.909052	2768
chr1	219640321	219640393	3	-	Kdm2a	0	0.00876225	0.144684	0.0743679	0.0811854	13.5922	0.681747	72
chr1	219641473	219641582	3	-	Kdm2a	0	0.0345482	0.204903	0.135739	0.11242	17.0355	-2.33189	109
chr1	219864109	219864188	4	-	RGD1563323	0	0.00828929	0.0722978	0.0374256	0.0373418	6.40086	-0.00838723	79
chr1	220746330	220746354	3	+	Eif1ad	34	0.00580462	0.0842302	0.0456874	0.0412174	7.84256	-0.447007	24
chr1	220868699	220869875	6	+	Cfl1	0	0.00482074	0.0908068	0.0652416	0.0607234	8.5986	-0.45182	1176
chr1	220992505	220992569	3	+	Rela	202	0.0490403	0.127998	0.154434	0.159961	7.89577	0.552721	64
chr1	221000568	221018463	39	+	Rela	0	0.29067	0.341765	0.316124	0.319374	5.10951	0.324935	17895
chr1	221042966	221043513	10	+	Map3k11	0	0.0125181	0.107268	0.0721069	0.0736672	9.47495	0.156035	547
chr1	221099895	221099917	3	+	Ltbp3	30	0.185736	0.263438	0.264522	0.246829	7.77019	-1.76924	22
chr1	221100109	221100164	4	+	Ltbp3	0	0.00340154	0.0672905	0.0407894	0.0500525	6.3889	0.926309	55
chr1	221159899	221173952	8	+	LOC102547101	-6257	0.217922	0.270491	0.278324	0.298209	5.25692	1.98848	14053
chr1	221280926	221281322	3	-	Cdc42ep2	0	0.129734	0.285067	0.293226	0.269198	15.5332	-2.40287	396
chr1	221448791	221486273	12	+	Cdca5	0	0.280006	0.343235	0.460953	0.466386	6.32287	0.543364	37482
chr1	221486539	221486595	4	-	Sac3d1	0	0.00609085	0.0983113	0.09767	0.0913763	9.22205	-0.629367	56
chr1	221644849	221644983	7	+	Ehd1	0	0.00436789	0.086159	0.0484956	0.0566139	8.17911	0.811835	134
chr1	221645103	221645208	3	+	Ehd1	0	0.00266667	0.143081	0.0800454	0.0726495	14.0414	-0.739589	105
chr1	221792339	221801567	5	+	Nrxn2	0	0.546717	0.597911	0.800624	0.805386	5.11945	0.476245	9228
chr1	221801647	221801673	3	+	Nrxn2	0	0.0054155	0.138272	0.0907563	0.0689946	13.2857	-2.17617	26
chr1	222168271	222178455	6	+	Trmt112	0	0.543227	0.609652	0.585969	0.578696	6.64253	-0.727299	10184
chr1	222178507	222181933	3	-	Esrra	0	0.00412088	0.101678	0.0515627	0.061086	9.75575	0.952327	3426
chr1	222183586	222190612	4	-	Kcnk4	0	0.0175505	0.0982758	0.0673149	0.0679093	8.07253	0.0594456	7026
chr1	222198624	222206544	3	+	Bad	0	0.00479466	0.0775429	0.0435188	0.0458104	7.27482	0.229164	7920
chr1	222246808	222247189	3	-	Dnajc4	0	0.0769693	0.23586	0.206336	0.23332	15.8891	2.69841	381
chr1	222258395	222293045	10	-	Fermt3	0	0.430898	0.490272	0.49117	0.487868	5.93737	-0.330144	34650
chr1	222417511	222417587	5	+	Macrod1	0	0.0708542	0.129516	0.100252	0.0861092	5.86622	-1.41428	76
chr1	222493118	222494742	4	-	Naa40	0	0.151256	0.345434	0.312585	0.300554	19.4178	-1.20308	1624
chr1	222494787	222495155	5	-	Naa40	0	0.0020728	0.105368	0.0449404	0.0383449	10.3295	-0.659549	368
chr1	222590439	222590612	8	-	Mark2	0	0.00341761	0.102173	0.0737315	0.0636892	9.87549	-1.00424	173
chr1	222628381	222628442	3	-	RGD1308106	0	0.00690236	0.109838	0.0684436	0.0470085	10.2936	-2.1435	61
chr1	222628969	222668505	7	-	RGD1308106	-135	0.00240682	0.121347	0.0753379	0.0768021	11.894	0.146426	39536
chr1	224934192	224938843	3	+	Wdr74	0	0.0642523	0.200154	0.134985	0.147832	13.5902	1.28473	4651
chr1	225076884	225085264	6	-	Uqcc3	0	0.00586073	0.197659	0.117499	0.134844	19.1798	1.73446	8380
chr1	225091800	225091851	3	+	Ints5	0	0.00511666	0.0939963	0.0636489	0.0468646	8.88796	-1.67844	51
chr1	225092001	225096519	5	+	Ints5	0	0.433577	0.53665	0.4577	0.482947	10.3073	2.5247	4518
chr1	225096774	225096798	3	+	Ganab	0	0.00284054	0.0712336	0.0320466	0.0297521	6.8393	-0.229451	24
chr1	225120291	225128921	9	+	B3gat3	0	0.502735	0.581478	0.384813	0.375154	7.8744	-0.965924	8630
chr1	225129407	225139639	10	+	Eml3	0	0.577681	0.653606	0.610624	0.64485	7.59246	3.4226	10232
chr1	225140848	225141044	8	+	Mta2	0	0.00509737	0.128122	0.0798997	0.0677761	12.3024	-1.21236	196
chr1	225151807	225163384	7	+	Tut1	0	0.489475	0.625458	0.414117	0.512486	13.5983	9.83693	11577
chr1	225164054	225184872	4	+	Eef1g	0	0.0515636	0.186856	0.0821572	0.08936	13.5292	0.72028	20818
chr1	225328872	225329252	4	-	Asrgl1	0	0.0135981	0.158439	0.0940625	0.0822047	14.4841	-1.18577	380
chr1	225329300	225329571	6	-	Asrgl1	0	0.0942295	0.201313	0.168369	0.159577	10.7084	-0.879183	271
chr1	226041568	226066685	11	-	Best1	0	0.698657	0.758622	0.687516	0.695482	5.99646	0.796634	25117
chr1	226353470	226353485	3	-	Dagla	0	0.0107682	0.101227	0.0659247	0.0581597	9.04588	-0.776494	15
chr1	226489659	226501197	10	+	Syt7	0	0.457907	0.504127	0.839129	0.938421	4.62201	9.92919	11538
chr1	226572418	226572458	3	+	Cpsf7	0	0.00380529	0.130758	0.144076	0.104093	12.6953	-3.99826	40
chr1	226630670	226630932	3	-	Tmem138	0	0.00324771	0.15172	0.12718	0.109246	14.8473	-1.79336	262
chr1	226631001	226631044	3	+	Cyb561a3	0	0.00423998	0.096688	0.0630922	0.0623297	9.2448	-0.0762542	43
chr1	226742575	226742616	3	+	Vps37c	0	0.00520833	0.123634	0.104358	0.0728346	11.8426	-3.15235	41
chr1	228395784	228440077	8	+	Osbp	0	0.0514018	0.166177	0.126324	0.103136	11.4775	-2.31878	44293
chr1	228755075	229026527	14	-	Dtx4	0	0.263756	0.318601	0.267834	0.256524	5.48449	-1.13098	271452
chr1	229639051	229639196	3	-	Zfp91	0	0.0251588	0.147657	0.0581232	0.0519143	12.2499	-0.620895	145
chr1	229639411	229639943	3	-	Zfp91	0	0.00779119	0.131024	0.0588522	0.0630367	12.3233	0.418444	532
chr1	233382730	233382771	3	+	Gnaq	8	0.00199007	0.0873551	0.0498955	0.0380703	8.5365	-1.18252	41
chr1	233382812	233382856	5	+	Gnaq	0	0.00399223	0.068896	0.0413935	0.0457414	6.49037	0.434797	44
chr1	233382888	233382993	3	+	Gnaq	0	0.0738202	0.20703	0.152723	0.151793	13.321	-0.0930066	105
chr1	234704732	234704796	5	-	Carnmt1	0	0.0570276	0.138312	0.188323	0.162166	8.12839	-2.61562	64
chr1	234749474	234749600	8	-	Nmrk1	0	0.0085633	0.104657	0.0497996	0.0461459	9.60938	-0.365365	126
chr1	236031354	236031504	4	+	Pcsk5	485	0.00108225	0.0969555	0.0570778	0.0480631	9.58732	-0.901466	150
chr1	236031691	236031712	3	+	Pcsk5	277	0.00401729	0.127823	0.0936655	0.0738636	12.3806	-1.98018	21
chr1	239398060	239640121	16	+	LOC102551900	0	0.385246	0.439478	0.394281	0.384856	5.42316	-0.942445	242061
chr1	240902790	240903416	5	-	LOC103691312	3615	0.00285714	0.104116	0.0684491	0.0661131	10.1259	-0.233601	626
chr1	240903434	240908136	4	-	LOC103691312	0	0.396805	0.483238	0.499099	0.516376	8.64331	1.72778	4702
chr1	240909140	240909295	4	+	Klf9	0	0.00514888	0.0703888	0.0478632	0.0419355	6.524	-0.592776	155
chr1	242765292	242765820	5	-	Pgm5	0	0.0611105	0.144414	0.100237	0.0938377	8.33034	-0.639964	528
chr1	242806915	242809028	6	-	Foxd4	0	0.0744897	0.157406	0.135625	0.132012	8.29164	-0.361248	2113
chr1	242809447	242809520	5	-	Foxd4	0	0.00447947	0.0813152	0.0559633	0.0478992	7.68358	-0.806413	73
chr1	243478009	243478043	3	+	Dmrt1	0	0.00672974	0.0882514	0.0906433	0.087619	8.15216	-0.302423	34
chr1	243588727	243589707	10	+	Dmrt3	0	0.0443487	0.159056	0.112511	0.0979486	11.4708	-1.45624	980
chr1	243590295	243590360	4	+	Dmrt3	0	0.0050576	0.0903487	0.0421625	0.0563605	8.52911	1.4198	65
chr1	243662863	243662930	4	+	Dmrt2	0	0.00744223	0.0775653	0.0522061	0.0476243	7.01231	-0.458187	67
chr1	243662954	243664115	5	+	Dmrt2	0	0.0111099	0.1346	0.0987651	0.0902093	12.349	-0.855574	1161
chr1	245237667	245237711	3	+	Vldlr	0	0.00599932	0.0674931	0.0424239	0.0273852	6.14938	-1.50387	44
chr1	245237774	245237930	3	+	Vldlr	0	0.00613074	0.166316	0.0907396	0.0791827	16.0185	-1.15569	156
chr1	245238482	245238516	3	+	Vldlr	0	0.00328947	0.126139	0.0795455	0.089404	12.285	0.985852	34
chr1	245238563	245238972	6	+	Vldlr	0	0.00251444	0.109027	0.0615647	0.0652659	10.6513	0.370118	409
chr1	246799054	246799109	4	-	NEWGENE_1565505	0	0.00389085	0.117872	0.0707798	0.0515742	11.3981	-1.92056	55
chr1	247084328	247084365	4	+	Plpp6	0	0.00501664	0.137598	0.0981905	0.0606579	13.2581	-3.75326	37
chr1	247110278	247110334	3	+	Cdc37l1	0	0.0853531	0.18112	0.13367	0.134716	9.57672	0.104561	56
chr1	247688694	247688785	4	+	Ric1	0	0.116288	0.189055	0.166453	0.155627	7.2767	-1.08258	91
chr1	247688845	247688918	6	+	Ric1	0	0.00579584	0.0930157	0.0616401	0.0660777	8.72198	0.443761	73
chr1	247689194	247689255	4	+	Ric1	0	0.00430108	0.0998903	0.00224378	0.0042319	9.55892	0.198812	61
chr1	247689377	247689466	4	+	Ric1	0	0.0336532	0.125232	0.114627	0.104031	9.15788	-1.05964	89
chr1	247978811	247978857	3	-	RGD1311595	-153	0.0019685	0.116761	0.095846	0.0638173	11.4792	-3.20287	46
chr1	248228713	248228756	3	+	Uhrf2	0	0.00283693	0.140629	0.115007	0.112734	13.7792	-0.227315	43
chr1	250300769	250301013	3	-	Prkg1	0	0.0491789	0.159605	0.090112	0.090806	11.0426	0.0694035	244
chr1	250950873	250950953	3	-	Sgms1	0	0.00167576	0.120678	0.0661509	0.0654634	11.9002	-0.068749	80
chr1	251145391	251145446	3	+	Papss2	0	0.00157233	0.101894	0.0674081	0.0770969	10.0322	0.968877	55
chr1	251419552	251419576	3	-	LOC102551694	0	0.00176991	0.104987	0.0809866	0.0926416	10.3217	1.1655	24
chr1	251420081	251420136	3	-	LOC102551694	0	0.0695699	0.131238	0.104878	0.107358	6.16677	0.247932	55
chr1	253176020	253185909	3	-	Pank1	0	0.192593	0.325837	0.183014	0.169625	13.3245	-1.33892	9889
chr1	254552505	254671305	6	-	Htr7	0	0.355035	0.423796	0.431945	0.411782	6.87611	-2.01634	118800
chr1	254974895	254974915	3	+	Pcgf5	0	0.00705435	0.0808361	0.0486168	0.0406898	7.37818	-0.792706	20
chr1	254975654	254975763	4	+	Pcgf5	0	0.00541923	0.120688	0.0736431	0.0692487	11.5269	-0.439443	109
chr1	255186268	255186318	3	+	Hectd2	412	0.00111111	0.0874378	0.0419931	0.0398794	8.63267	-0.211376	50
chr1	255429862	255479075	12	+	LOC100910717	0	0.415356	0.466246	0.443427	0.419523	5.08899	-2.39046	49213
chr1	255564457	255564501	3	+	Btaf1	0	0.00344828	0.164348	0.10109	0.104451	16.09	0.336064	44
chr1	255842574	255842625	4	+	2005-03-01	15	0.00645395	0.125262	0.0731397	0.0694271	11.8808	-0.371266	51
chr1	256013679	256035902	11	-	Ide	0	0.0898462	0.206619	0.11494	0.109473	11.6773	-0.546709	22223
chr1	256101239	256101811	7	+	Hhex	184	0.0128639	0.107157	0.0669031	0.06785	9.42927	0.0946976	572
chr1	256372886	256381018	19	+	Cyp26c1	0	0.0306447	0.115923	0.0954003	0.0774789	8.52784	-1.79214	8132
chr1	256381069	256381088	3	-	LOC102549441	0	0.00879505	0.0668998	0.0334889	0.0296026	5.81047	-0.38863	19
chr1	256381189	256382186	10	-	LOC102549441	0	0.0324299	0.148247	0.0975195	0.0934813	11.5817	-0.403824	997
chr1	256383014	256383162	4	+	Cyp26a1	0	0.0609554	0.154847	0.105471	0.105535	9.38912	0.00640169	148
chr1	256813779	256913523	11	+	Pde6c	0	0.167175	0.2632	0.287935	0.255469	9.60248	-3.24656	99744
chr1	257156982	257157092	3	+	Plce1	0	0.00469494	0.105754	0.0658458	0.0633244	10.1059	-0.252145	110
chr1	257157224	257157269	6	+	Plce1	0	0.0459972	0.105964	0.0733551	0.0783211	5.99664	0.496594	45
chr1	257157532	257157592	3	+	Plce1	0	0.0064471	0.0981073	0.0826831	0.0576923	9.16602	-2.49908	60
chr1	259356802	259356968	5	-	Pdlim1	0	0.0669255	0.179053	0.159585	0.1542	11.2128	-0.538498	166
chr1	260460588	260460965	3	-	Tll2	0	0.00868766	0.156486	0.0927039	0.0785205	14.7799	-1.41834	377
chr1	260689284	260690946	4	-	LOC103691362	-9819	0.0416648	0.132507	0.103964	0.0754721	9.08426	-2.84919	1662
chr1	261061248	261065960	4	-	LOC102553733	0	0.417201	0.646709	0.447268	0.634682	22.9509	18.7415	4712
chr1	261089580	261089850	8	-	Frat2	0	0.0716372	0.198972	0.157514	0.148081	12.7335	-0.943342	270
chr1	261229579	261229633	3	+	Ubtd1	0	0.00310232	0.0984558	0.0527616	0.0387097	9.53535	-1.40519	54
chr1	261229811	261229905	3	+	Ubtd1	0	0.0873899	0.165535	0.133569	0.133801	7.81452	0.023246	94
chr1	261229944	261230082	3	+	Ubtd1	0	0	0.11084	0.0932529	0.0843544	11.084	-0.889843	138
chr1	261446388	261446432	3	-	Sfrp5	0	0.00534454	0.105756	0.0657188	0.0590025	10.0412	-0.671636	44
chr1	261668764	261668935	6	-	Crtac1	0	0.0090636	0.160482	0.104907	0.103691	15.1419	-0.121671	171
chr1	263029698	263029836	4	+	LOC100911855	0	0.00362042	0.136366	0.112301	0.0958748	13.2746	-1.64267	138
chr1	263029847	263131470	9	+	LOC100911855	0	0.0326582	0.131225	0.170118	0.188819	9.85667	1.87004	101623
chr1	263355758	263366528	20	+	Nkx2-3	0	0.14846	0.208273	0.196416	0.193835	5.98132	-0.258128	10770
chr1	263370365	263371087	5	+	Nkx2-3	0	0.00870858	0.116165	0.0471101	0.0412313	10.7457	-0.587878	722
chr1	263845492	263845564	4	-	Erlin1	0	0.00217414	0.139224	0.0878133	0.0812848	13.705	-0.652856	72
chr1	264029590	264049972	6	+	Scd2	9403	0.0686604	0.185995	0.171201	0.143365	11.7335	-2.78365	20382
chr1	264430855	264465354	17	+	LOC102548668	22596	0.239285	0.291021	0.319889	0.312017	5.17367	-0.787139	34499
chr1	264488855	264493992	8	+	LOC102548668	0	0.012874	0.0905819	0.061832	0.0515463	7.77079	-1.02857	5137
chr1	264496164	264496519	5	+	Pax2	0	0.332507	0.236878	0.300024	0.276645	-9.56296	-2.33784	355
chr1	264503767	264504043	6	+	Pax2	0	0.0138046	0.101735	0.0656275	0.0517574	8.79309	-1.38701	276
chr1	264807725	264819824	12	+	Sfxn3	-2567	0.157542	0.248605	0.227247	0.198978	9.10628	-2.8269	12099
chr1	264893691	264896534	14	+	Tlx1	0	0.0870015	0.157702	0.118811	0.10986	7.07005	-0.895059	2843
chr1	264896653	264897737	4	+	Tlx1	0	0.00628228	0.0931035	0.042779	0.0444139	8.68213	0.163495	1084
chr1	264975533	264976084	6	-	Lbx1	-402	0.0907503	0.147961	0.111664	0.113325	5.72103	0.166058	551
chr1	265497648	265498095	10	-	Fgf8	0	0.0125647	0.0862944	0.0583851	0.0483059	7.37297	-1.00792	447
chr1	265757099	265757146	5	-	C1H10orf76	0	0.00356436	0.117509	0.052668	0.0551559	11.3944	0.248792	47
chr1	265757187	265761845	3	-	C1H10orf76	0	0.103028	0.214243	0.21234	0.190838	11.1214	-2.15016	4658
chr1	265798750	265809930	4	+	Pprc1	0	0.50142	0.653199	0.487572	0.51933	15.1779	3.17581	11180
chr1	265900398	265900498	4	-	Pitx3	-452	0.100196	0.162781	0.138633	0.135215	6.25851	-0.341841	100
chr1	266065547	266065605	4	-	Psd	0	0.00987876	0.105817	0.0688668	0.0592929	9.59384	-0.957386	58
chr1	266065616	266074849	18	-	Psd	0	0.333153	0.394395	0.326546	0.357927	6.12423	3.13801	9233
chr1	266076346	266076577	3	+	Fbxl15	0	0.050176	0.138639	0.106625	0.0909942	8.84629	-1.56311	231
chr1	266076595	266076782	7	+	Fbxl15	0	0.00479898	0.084699	0.0655766	0.0565991	7.99001	-0.897751	187
chr1	266530690	266530724	4	+	Cnnm2	0	0.105138	0.173546	0.326465	0.35142	6.84083	2.49546	34
chr1	266953376	266953420	3	+	Neurl1	0	0.00274897	0.104046	0.0596264	0.0784174	10.1297	1.8791	44
chr1	266953444	266953531	4	+	Neurl1	0	0.00702312	0.111237	0.0808173	0.0602409	10.4214	-2.05764	87
chr1	267358493	267358725	3	+	Slk	1045	0.167287	0.292916	0.206288	0.236938	12.5629	3.06498	232
chr1	267359697	267359773	4	+	Slk	0	0.0606744	0.161143	0.12303	0.0987997	10.0468	-2.42306	76
chr1	267985867	267986010	5	+	Sorcs3	296	0.00647621	0.0834603	0.0630523	0.0466758	7.69841	-1.63764	143
chr1	267986697	267986812	6	+	Sorcs3	0	0.0067906	0.08477	0.052273	0.0481027	7.79794	-0.417029	115
chr1	274245513	274245874	8	+	Dusp5	0	0.0667916	0.148545	0.131873	0.125352	8.17532	-0.652067	361
chr1	274625840	274625884	3	+	Pdcd4	0	0.0197437	0.117521	0.0904118	0.0721854	9.77774	-1.82264	44
chr1	274765269	274765376	6	+	Adra2a	908	0.00328302	0.0919348	0.0576871	0.0495786	8.86518	-0.810847	107
chr1	276011503	276011802	4	-	Tcf7l2	0	0.00493845	0.0856467	0.0985577	0.107103	8.07082	0.854557	299
chr1	276011926	276011963	3	-	Tcf7l2	0	0.00468147	0.0638138	0.049217	0.0354298	5.91323	-1.37872	37
chr1	276309393	276309579	4	-	Zdhhc6	0	0.0256696	0.129453	0.0942105	0.0739064	10.3783	-2.03041	186
chr1	277191215	277191344	7	+	Casp7	0	0.00610368	0.0806272	0.0422441	0.0406234	7.45235	-0.162061	129
chr1	277538927	277538948	3	+	Adrb1	0	0.00102041	0.122619	0.0918631	0.0982587	12.1599	0.639563	21
chr1	277826366	277826599	4	-	Afap1l2	0	0.00862067	0.126564	0.0853862	0.0838088	11.7943	-0.157744	233
chr1	277827023	277827136	4	-	Afap1l2	0	0.0654105	0.141783	0.105282	0.104144	7.63727	-0.113738	113
chr1	280014407	280014732	7	+	LOC103691386	0	0.038579	0.170378	0.105871	0.0953028	13.1799	-1.05681	325
chr1	280014900	280014984	3	+	LOC103691386	0	0.0717661	0.16765	0.145919	0.119174	9.58836	-2.67451	84
chr1	280334676	280335074	9	-	Vax1	0	0.0116979	0.124576	0.0650196	0.0641272	11.2878	-0.0892391	398
chr1	280514974	280515035	4	-	Pdzd8	0	0.00552323	0.0863943	0.0575973	0.0519137	8.08711	-0.568355	61
chr1	280633760	280633813	3	-	LOC103691392	0	0.004338	0.0748213	0.0579582	0.0393952	7.04833	-1.8563	53
chr1	280636472	280643729	24	+	Emx2	0	0.0601333	0.164024	0.143232	0.138957	10.389	-0.427517	7257
chr1	280644658	280694320	9	+	Emx2	-3711	0.43973	0.505584	0.453153	0.486829	6.58538	3.3676	49662
chr1	281101763	281101825	4	-	Rab11fip2	-601	0.0795302	0.153331	0.124459	0.119487	7.38004	-0.49715	62
chr1	281376926	281377011	5	-	Fam204a	-93	0.0197145	0.0947342	0.0603805	0.0657501	7.50197	0.536957	85
chr1	282170101	282170177	4	+	LOC103691397	0	0.00287598	0.0961792	0.0567868	0.0569953	9.33032	0.020845	76
chr1	282188096	282188224	4	+	Fam45a	0	0.00453431	0.0643239	0.0307927	0.0189325	5.97896	-1.18602	128
chr1	282264995	282265030	3	+	Grk5	342	0.00152672	0.0748067	0.0466667	0.0247104	7.328	-2.19562	35
chr10	1151016	1151622	13	-	LOC102555329	-1068	0.0277546	0.106847	0.0973529	0.0946022	7.90926	-0.275071	606
chr10	1461109	1461185	8	-	Parn	0	0.00456937	0.109874	0.0499811	0.0501221	10.5305	0.0140971	76
chr10	1465074	1550518	4	+	Bfar	0	0.00971364	0.145264	0.0801488	0.0722539	13.555	-0.789494	85444
chr10	4249566	4249655	6	-	Snx29	0	0.0492371	0.11402	0.0915369	0.0943964	6.47828	0.285948	89
chr10	4719903	4719923	3	-	LOC102554936	-2227	0.00635309	0.119511	0.0819704	0.0610705	11.3157	-2.08999	20
chr10	5406199	5433134	11	+	Emp2	115	0.362658	0.437764	0.487695	0.504304	7.51065	1.66087	26935
chr10	5706925	5707138	5	+	Grin2a	669	0.00420191	0.101094	0.0628172	0.0579712	9.68922	-0.484599	213
chr10	7041375	7041448	4	+	Carhsp1	0	0.00568656	0.0969134	0.0565568	0.0470483	9.12268	-0.950851	73
chr10	7280232	7280419	7	+	Tmem114	0	0.00553702	0.105159	0.0814876	0.0760942	9.96218	-0.539339	187
chr10	10573228	10573531	4	+	Nagpa	0	0.0535266	0.175059	0.107116	0.0822758	12.1533	-2.48404	303
chr10	10725214	10725252	4	-	Ubn1	0	0.00821803	0.0648047	0.0861582	0.0704918	5.65867	-1.56664	38
chr10	10725375	10725491	4	-	Ubn1	0	0.0212428	0.16402	0.113499	0.1025	14.2778	-1.09986	116
chr10	10831657	10881658	9	-	Nudt16l1	0	0.155279	0.262868	0.22416	0.212896	10.7589	-1.12648	50001
chr10	11033912	11035042	7	-	Hmox2	0	0.170304	0.270097	0.083154	0.0814724	9.97929	-0.168159	1130
chr10	11146519	11146558	3	+	Pam16	0	0.000647249	0.103571	0.0661262	0.049013	10.2924	-1.71132	39
chr10	11174650	11174667	4	-	Glis2	0	0.00398354	0.0909698	0.0482996	0.0530679	8.69863	0.47683	17
chr10	11205879	11206217	7	+	Tfap4	0	0.0596976	0.12292	0.0880442	0.0851613	6.32225	-0.288293	338
chr10	11211078	11225082	17	+	Tfap4	0	0.532985	0.651659	0.624355	0.671719	11.8674	4.73644	14004
chr10	11225135	11225163	3	+	Tfap4	-2161	0.00414945	0.108703	0.0710265	0.0792167	10.4553	0.819024	28
chr10	11225175	11226201	7	+	Tfap4	-2201	0.290127	0.34439	0.284163	0.2902	5.42635	0.603696	1026
chr10	11392479	11392842	3	+	Adcy9	0	0.00716958	0.0991635	0.0975105	0.0745471	9.1994	-2.29635	363
chr10	11775491	11785719	3	+	Slx4	2038	0.680934	0.813961	0.704757	0.716826	13.3027	1.20691	10228
chr10	11877771	11877900	5	-	Cluap1	0	0.067124	0.15105	0.127827	0.128604	8.39263	0.0776829	129
chr10	12857728	12871932	16	-	Trnap-ugg	0	0.222768	0.290786	0.163424	0.168068	6.8018	0.464422	14204
chr10	12980756	12990418	13	+	Bicdl2	0	0.191651	0.27394	0.286501	0.281982	8.22893	-0.451915	9662
chr10	12997385	12997827	7	-	Tnfrsf12a	0	0.00123071	0.0774982	0.048744	0.0481799	7.62675	-0.0564107	442
chr10	12997881	12997957	3	-	Tnfrsf12a	0	0.0633742	0.193236	0.170189	0.13583	12.9862	-3.43592	76
chr10	12997970	13001829	8	+	Cldn6	0	0.314856	0.384166	0.481285	0.506737	6.93101	2.54522	3859
chr10	13075797	13076291	4	-	Paqr4	0	0.00607929	0.094614	0.164251	0.159296	8.85347	-0.49555	494
chr10	13081239	13081329	3	-	Kremen2	-104	0.0136285	0.116922	0.0889463	0.07482	10.3293	-1.41263	90
chr10	13107863	13107911	3	-	Flywch1	0	0.00617117	0.0736041	0.0845841	0.0782313	6.74329	-0.635283	48
chr10	13120580	13128754	3	+	Srrm2	67	0.0844769	0.218549	0.144214	0.130216	13.4072	-1.39983	8174
chr10	13536971	13541424	7	-	Amdhd2	0	0.0399038	0.132947	0.0782972	0.0682313	9.30429	-1.00659	4453
chr10	13723311	13723345	3	+	Abca3	46	0.00387363	0.136929	0.105009	0.0934505	13.3055	-1.1559	34
chr10	13723386	13723418	3	+	Abca3	0	0.00177384	0.073847	0.0443619	0.0341675	7.20731	-1.01944	32
chr10	13844393	13844499	7	-	Mlst8	0	0.0583425	0.120475	0.0961975	0.0950925	6.21328	-0.110507	106
chr10	13844533	13844588	3	-	Mlst8	0	0.0053832	0.0924528	0.064273	0.0549242	8.70696	-0.934881	55
chr10	13845253	13854633	14	+	Caskin1	0	0.190014	0.250725	0.177961	0.179327	6.07118	0.136631	9380
chr10	13893240	13898624	9	+	LOC102551976	0	0.499158	0.559368	0.501283	0.516249	6.02101	1.49661	5384
chr10	14021724	14022021	4	-	Npw	0	0.121625	0.200542	0.117956	0.116111	7.89162	-0.184466	297
chr10	14022472	14034948	3	-	Npw	-21	0.00929318	0.132385	0.0880315	0.0768472	12.3092	-1.11843	12476
chr10	14087933	14088242	3	-	Rnf151	0	0.00296739	0.111453	0.230508	0.313846	10.8486	8.33377	309
chr10	14091750	14092136	4	-	Ndufb10	0	0.00269355	0.123836	0.0653798	0.0718352	12.1142	0.645546	386
chr10	14216354	14216405	3	+	Hagh	0	0.00731982	0.132009	0.0899281	0.0745614	12.469	-1.53667	51
chr10	14324458	14325107	7	-	Cramp1	0	0.184783	0.251387	0.208051	0.236438	6.66043	2.83877	649
chr10	14372960	14373216	4	-	Cramp1	0	0.00922458	0.0755445	0.0659613	0.0587931	6.63199	-0.716819	256
chr10	14492792	14492876	3	+	Clcn7	0	0.0153699	0.210964	0.153889	0.137688	19.5594	-1.62009	84
chr10	14580970	14597869	12	+	Unkl	0	0.0210041	0.0998584	0.155221	0.156965	7.88543	0.174451	16899
chr10	14789303	14789377	3	-	Cacna1h	-687	0.00475569	0.131084	0.102347	0.0886754	12.6328	-1.36718	74
chr10	14789813	14790786	4	-	Cacna1h	-1197	0.223153	0.366267	0.389905	0.396978	14.3113	0.707273	973
chr10	15190726	15195960	11	+	Wdr24	0	0.517156	0.570492	0.493052	0.527836	5.33364	3.47841	5234
chr10	15199986	15200035	3	-	Stub1	0	0.0587679	0.157374	0.118847	0.114238	9.86064	-0.460886	49
chr10	15235474	15235576	6	-	Mcrip2	0	0.00363213	0.130373	0.0935154	0.0663219	12.6741	-2.71934	102
chr10	15460189	15465228	4	-	Decr2	0	0.00499462	0.131572	0.0804972	0.0770058	12.6577	-0.349136	5039
chr10	15621286	15667750	6	+	Nprl3	0	0.360113	0.453433	0.659558	0.652639	9.33197	-0.69196	46464
chr10	15672224	15672357	3	+	Rhbdf1	26	0.00459595	0.103346	0.0630086	0.0558929	9.87499	-0.711576	133
chr10	15681145	15689127	13	+	Rhbdf1	0	0.452898	0.503587	0.653372	0.70543	5.06887	5.20575	7982
chr10	15689450	15689535	4	-	Snrnp25	-117	0.00358975	0.0983409	0.0919066	0.085947	9.47512	-0.595957	85
chr10	16046782	16046854	3	-	Cpeb4	0	0.00322221	0.0888733	0.0564274	0.0596152	8.56511	0.318783	72
chr10	16542626	16542722	4	+	Stc2	188	0.0300615	0.121683	0.0740913	0.0809465	9.16212	0.685516	96
chr10	16612379	16627127	7	-	LOC102551876	0	0.286221	0.404858	0.408139	0.386471	11.8637	-2.16679	14748
chr10	16633045	16633167	4	+	Nkx2-5	2823	0.00979639	0.116742	0.1166	0.0802469	10.6946	-3.63529	122
chr10	16636005	16636203	3	+	Nkx2-5	0	0.00884705	0.110312	0.0531693	0.0469868	10.1465	-0.618245	198
chr10	17426500	17426539	3	+	Stk10	0	0.844125	0.946759	0.889679	0.918605	10.2635	2.89258	39
chr10	18124919	18125701	6	-	Tlx3	3438	0.0698557	0.156702	0.130392	0.114821	8.68461	-1.55709	782
chr10	18129026	18129179	8	-	Tlx3	0	0.00629943	0.101564	0.0685149	0.0606597	9.52644	-0.785518	153
chr10	18129255	18129375	6	-	Tlx3	0	0.00584918	0.108123	0.045028	0.0410003	10.2274	-0.402771	120
chr10	18132260	18132277	3	-	Tlx3	-526	0.00506906	0.120453	0.0956316	0.0835983	11.5384	-1.20333	17
chr10	18443548	18443622	4	-	Ranbp17	0	0.118545	0.17895	0.154457	0.166428	6.04052	1.19705	74
chr10	19652859	19652908	3	-	Spdl1	0	0.00171595	0.0916231	0.0477153	0.0533908	8.99071	0.567549	49
chr10	19924156	19924654	4	+	Slit3	0	0.00179991	0.106463	0.0786134	0.0835864	10.4663	0.497306	498
chr10	20621502	20621570	3	-	Fbll1	0	0.00702459	0.165703	0.115274	0.103607	15.8679	-1.16669	68
chr10	20818449	20818475	3	-	Wwc1	0	0.00890975	0.0798221	0.0486428	0.0400407	7.09123	-0.860217	26
chr10	20818481	20822604	7	-	Wwc1	0	0.159796	0.260797	0.230191	0.235675	10.1001	0.548406	4123
chr10	22086665	22086721	4	-	LOC102551468	17193	0.00819957	0.0683462	0.0396303	0.0381648	6.01466	-0.146553	56
chr10	25847796	25891058	7	-	Mat2b	0	0.00331714	0.134218	0.0942324	0.0870602	13.0901	-0.717213	43262
chr10	29289438	29289589	3	+	Pwwp2a	0	0.0976801	0.265647	0.0896043	0.0891696	16.7967	-0.0434653	151
chr10	29289770	29289795	3	+	Pwwp2a	0	0.00106952	0.100778	0.0448445	0.0558776	9.97088	1.1033	25
chr10	30053081	30118742	10	-	Ublcp1	0	0.355939	0.444657	0.262834	0.279132	8.87181	1.62973	65661
chr10	30834030	30931833	11	+	Clint1	0	0.360922	0.462562	0.409671	0.418969	10.164	0.929772	97803
chr10	30953282	30979437	6	+	Clint1	0	0.262779	0.418988	0.270279	0.257246	15.6209	-1.30334	26155
chr10	31532206	31532310	6	+	Med7	0	0.00372016	0.0869787	0.0719403	0.071609	8.32586	-0.0331288	104
chr10	34524780	34524894	3	+	Mgat1	0	0.12472	0.220102	0.134749	0.130206	9.53824	-0.454266	114
chr10	35725934	35726047	3	+	Mgat4b	455	0.137108	0.22554	0.193977	0.180049	8.84317	-1.39279	113
chr10	36346070	36346228	6	+	Grm6	0	0.00618139	0.126307	0.0448591	0.0419503	12.0126	-0.290872	158
chr10	37312104	37312247	4	-	Jade2	0	0.0511465	0.128488	0.0983545	0.0954944	7.73411	-0.286005	143
chr10	37312360	37313221	5	-	Jade2	0	0.169614	0.272076	0.240971	0.239468	10.2462	-0.150282	861
chr10	37313337	37313376	3	+	LOC100910970	0	0.00389111	0.105348	0.29078	0.24031	10.1457	-5.04701	39
chr10	37313444	37313507	3	+	LOC100910970	0	0.0437788	0.127915	0.102587	0.098677	8.41366	-0.391004	63
chr10	37313627	37313991	4	+	LOC100910970	0	0.00217816	0.157714	0.0571429	0.0563919	15.5536	-0.0750967	364
chr10	37554411	37554498	3	-	Ppp2ca	0	0.0406324	0.152084	0.112144	0.118585	11.1451	0.644179	87
chr10	37646014	37646611	3	-	Tcf7	0	0.0101906	0.110687	0.0879942	0.0877193	10.0496	-0.0274876	597
chr10	38837445	38837518	4	-	Sowaha	0	0.00196771	0.0834917	0.0557644	0.0580384	8.1524	0.227398	73
chr10	38837604	38837643	3	-	Sowaha	0	0.0091521	0.0923567	0.0497458	0.0606287	8.32046	1.08829	39
chr10	38857356	38877290	10	+	2008-09-01	133	0.160673	0.231129	0.33684	0.32813	7.04561	-0.870954	19934
chr10	38877319	38877377	4	+	2008-09-01	46	0.0284582	0.151479	0.112633	0.0925866	12.3021	-2.00466	58
chr10	39102926	39109179	3	+	Irf1	352	0.0050145	0.16832	0.0837339	0.0846846	16.3306	0.0950783	6253
chr10	39109654	39109720	3	+	Irf1	0	0.0437988	0.116494	0.0696841	0.0628177	7.26954	-0.686645	66
chr10	39373708	39405141	21	-	Pdlim4	0	0.410944	0.461018	0.388615	0.39676	5.00745	0.814532	31433
chr10	40122873	40123185	5	-	Cdc42se2	0	0.0903405	0.168631	0.134768	0.124293	7.82905	-1.04747	312
chr10	40375113	40375330	5	-	Anxa6	0	0.0157116	0.10234	0.0667665	0.0606039	8.66287	-0.616263	217
chr10	40805581	40805659	4	-	Atox1	0	0.00168921	0.102636	0.0651089	0.061895	10.0946	-0.321383	78
chr10	43066824	43066845	3	+	Galnt10	472	0.00257732	0.116705	0.0734266	0.0731918	11.4127	-0.023481	21
chr10	45243554	45267767	17	-	Zfp39	0	0.310359	0.361122	0.203494	0.193326	5.07627	-1.01676	24213
chr10	45278699	45278980	4	-	Rnf187	0	0.00115741	0.110619	0.0701163	0.0575734	10.9461	-1.25429	281
chr10	45322231	45322261	3	+	Trim11	0	0.00664197	0.114602	0.0947661	0.0631201	10.796	-3.1646	30
chr10	45514745	45514789	3	-	Iba57	0	0.00244187	0.122758	0.0745875	0.067127	12.0316	-0.746051	44
chr10	45514796	45514826	3	-	Iba57	0	0.0049328	0.0998487	0.0663743	0.0525	9.49159	-1.38743	30
chr10	45543995	45552780	3	-	Guk1	0	0.0879921	0.225099	0.205624	0.190928	13.7107	-1.4696	8785
chr10	45560060	45560461	4	+	RGD1304587	0	0.0215284	0.162153	0.110195	0.0922669	14.0625	-1.79282	401
chr10	45616038	45616279	3	-	Wnt3a	0	0.00247525	0.0959656	0.031009	0.0241983	9.34904	-0.68107	241
chr10	45641467	45642293	7	-	Wnt3a	0	0.0152753	0.112812	0.0851226	0.0731265	9.75368	-1.19961	826
chr10	45650992	45658756	5	+	Wnt9a	292	0.0331127	0.132345	0.172304	0.15333	9.92323	-1.89745	7764
chr10	45799002	45799035	4	+	Jmjd4	0	0.00643074	0.143255	0.0901611	0.080932	13.6824	-0.922913	33
chr10	45799069	45799336	3	+	Jmjd4	0	0.00352341	0.138874	0.083739	0.0809414	13.5351	-0.279765	267
chr10	46018113	46018543	4	+	Mprip	0	0.00475687	0.111001	0.0643485	0.0718267	10.6244	0.747812	430
chr10	46486957	46511571	4	+	Rai1	0	0.369448	0.429535	0.359631	0.348396	6.00878	-1.12351	24614
chr10	46511681	46542046	7	+	Rai1	0	0.422342	0.55667	0.486514	0.506273	13.4328	1.97598	30365
chr10	46548522	46548675	3	+	Rai1	0	0.0120223	0.102989	0.0707381	0.0707612	9.09666	0.00231327	153
chr10	46818456	46818710	4	+	Drg2	0	0.00243902	0.0571446	0.0347883	0.0275935	5.47056	-0.719485	254
chr10	46906365	46906436	4	+	Alkbh5	0	0.0051175	0.100355	0.0615841	0.0702401	9.52378	0.865596	71
chr10	46969676	46969752	3	+	Mief2	0	0.0061413	0.124572	0.0914718	0.0893156	11.8431	-0.215623	76
chr10	47857356	47857372	3	-	Epn2	-19	0.00502627	0.0932374	0.0558248	0.0418338	8.82111	-1.3991	16
chr10	48056772	48128758	10	-	Ulk2	0	0.587813	0.651264	0.673174	0.6751	6.34506	0.192694	71986
chr10	48128845	48128885	4	-	Ulk2	0	0.00353147	0.0643453	0.0337128	0.0263679	6.08138	-0.734491	40
chr10	48129104	48129215	5	-	Ulk2	0	0.115729	0.169662	0.146881	0.149441	5.39326	0.256025	111
chr10	48209978	48210066	5	-	Akap10	0	0.081667	0.142116	0.168487	0.1662	6.04489	-0.228792	88
chr10	49150538	49150657	3	-	Zfp287	0	0.00550287	0.112443	0.0798997	0.0741574	10.694	-0.574224	119
chr10	49175332	49175397	3	-	Trnaw-cca	-8270	0.00759369	0.0700117	0.093077	0.076056	6.2418	-1.7021	65
chr10	50399739	50400898	12	-	Hs3st3b1	0	0.0200766	0.137187	0.0877827	0.0735067	11.7111	-1.42759	1159
chr10	50401547	50401969	3	-	Hs3st3b1	0	0.124682	0.207324	0.0866695	0.0907484	8.26424	0.407889	422
chr10	50402156	50402242	3	-	Hs3st3b1	0	0.00563222	0.14207	0.0923522	0.0877193	13.6438	-0.463294	86
chr10	50928276	50928451	8	+	Hs3st3a1	0	0.00627683	0.0711018	0.0366562	0.039426	6.4825	0.276978	175
chr10	51478539	51478588	3	+	Elac2	0	0.00505623	0.134822	0.00241546	0.00245098	12.9766	0.00355215	49
chr10	52327490	52327670	3	+	Zfp18	5	0.101408	0.170855	0.141742	0.140291	6.94478	-0.145132	180
chr10	53038705	53038736	3	-	Shisa6	-890	0.00739439	0.0786289	0.0455171	0.04301	7.12345	-0.250712	31
chr10	54011155	54011294	7	+	Gas7	0	0.00485556	0.115118	0.0651072	0.066052	11.0262	0.0944862	139
chr10	54468101	54468250	3	+	LOC100911946	127	0.129983	0.180759	0.316994	0.293333	5.07767	-2.3661	149
chr10	54967831	54967887	3	-	Ntn1	0	0.00493508	0.141131	0.0739554	0.0742874	13.6196	0.0331947	56
chr10	54967932	54968014	4	-	Ntn1	0	0.00493467	0.14801	0.102492	0.0836598	14.3075	-1.88319	82
chr10	54968643	54968765	3	-	Ntn1	0	0.00414138	0.12134	0.0786711	0.0700482	11.7198	-0.862292	122
chr10	55138785	55149007	12	+	Mfsd6l	0	0.157192	0.248265	0.149225	0.151411	9.10728	0.218619	10222
chr10	55275196	55275478	3	+	Myh10	0	0.00220012	0.0933783	0.0328464	0.0323394	9.11782	-0.0506983	282
chr10	55627094	55642065	10	+	Aurkb	0	0.117205	0.195573	0.209407	0.216621	7.83683	0.721395	14971
chr10	55643826	55653954	9	+	Borcs6	0	0.0358254	0.136159	0.0994852	0.101381	10.0333	0.189623	10128
chr10	55654160	55675439	6	+	Tmem107	0	0.274318	0.394361	0.404395	0.392039	12.0042	-1.23565	21279
chr10	55810378	55814448	5	-	Gucy2d	21248	0.826172	0.885315	0.880562	0.888818	5.91428	0.825548	4070
chr10	55998011	55998099	3	+	Naa38	0	0.00302956	0.123222	0.0752792	0.0852487	12.0193	0.996955	88
chr10	56013522	56025953	3	-	LOC102555947	0	0.00666578	0.152224	0.0868407	0.0904415	14.5558	0.360079	12431
chr10	56211431	56228866	14	-	Atp1b2	0	0.0659231	0.18006	0.169067	0.160855	11.4137	-0.821155	17435
chr10	56237837	56237880	3	+	Fxr2	0	0.00386878	0.112531	0.0769298	0.0606307	10.8663	-1.62991	43
chr10	56276853	56286253	12	-	Senp3	0	0.357662	0.465533	0.367795	0.397496	10.7871	2.97003	9400
chr10	56441646	56441707	6	-	Nlgn2	0	0.0074363	0.0699881	0.0572707	0.0528049	6.25518	-0.446588	61
chr10	56442869	56444280	6	-	Nlgn2	0	0.352831	0.435804	0.403968	0.436359	8.29732	3.2391	1411
chr10	56491407	56491807	4	-	Kctd11	0	0.0457547	0.147523	0.117055	0.11954	10.1768	0.248519	400
chr10	56491847	56492043	4	-	Kctd11	-133	0.00991595	0.122573	0.110802	0.0817742	11.2657	-2.90276	196
chr10	56492223	56511345	27	-	Acap1	0	0.412019	0.492189	0.419783	0.469808	8.01698	5.00246	19122
chr10	56546307	56546598	4	+	Ybx2	92	0.00462674	0.110982	0.0649399	0.0544317	10.6355	-1.05082	291
chr10	56559020	56576432	5	+	LOC102555366	0	0.0955985	0.197666	0.0391419	0.0368223	10.2068	-0.231958	17412
chr10	56591400	56600691	7	+	Ctdnep1	0	0.21593	0.297895	0.265183	0.264643	8.1965	-0.0539636	9291
chr10	57127303	57162465	7	+	Gltpd2	0	0.261648	0.384498	0.243739	0.270608	12.2849	2.68688	35162
chr10	57166192	57185260	15	+	Pld2	0	0.766178	0.819574	0.743464	0.797311	5.33959	5.38466	19068
chr10	57268190	57268581	4	+	Rnf167	0	0.00284972	0.119188	0.122103	0.12084	11.6339	-0.126336	391
chr10	57268600	57275243	15	+	Rnf167	0	0.207702	0.284129	0.254064	0.264931	7.6427	1.08676	6643
chr10	57309217	57309274	4	-	Camta2	0	0.00507363	0.0821454	0.0388334	0.0354116	7.70718	-0.342179	57
chr10	57322045	57322338	4	-	Inca1	0	0.0539017	0.16188	0.0462893	0.0409541	10.7978	-0.533518	293
chr10	57638311	57638370	4	-	Dhx33	0	0.00311339	0.131368	0.0822296	0.076218	12.8255	-0.601162	59
chr10	57653801	57670828	12	+	Mis12	0	0.0376057	0.12891	0.109019	0.099077	9.13045	-0.994248	17027
chr10	58604449	58613118	4	-	Aipl1	0	0.446471	0.509401	0.430997	0.419026	6.29301	-1.19718	8669
chr10	58784476	58784493	3	+	LOC100912483	0	0.0642846	0.133181	0.121686	0.105305	6.8896	-1.63802	17
chr10	58924352	58924431	6	-	Tekt1	-255	0.00543658	0.0999699	0.0599284	0.0581622	9.45333	-0.176615	79
chr10	59173441	59173458	3	+	Ube2g1	0	0.0636013	0.155142	0.465046	0.464844	9.15412	-0.0201843	17
chr10	59260008	59260074	4	+	Ankfy1	0	0.00491519	0.0792939	0.0365734	0.0403525	7.43787	0.377902	66
chr10	59697705	59697845	8	-	Gsg2	0	0.0830882	0.171235	0.0925258	0.0957295	8.8147	0.320365	140
chr10	61577314	61577339	4	+	Smg6	-34732	0.00237671	0.0939254	0.0589877	0.0642552	9.15487	0.526749	25
chr10	61745640	61745672	3	-	Sgsm2	-321	0.00338507	0.0868546	0.0609832	0.0578408	8.34695	-0.314232	32
chr10	62011222	62011472	6	-	Hic1	-449	0.00754161	0.0634842	0.0352414	0.042144	5.59426	0.69026	250
chr10	62013950	62014099	3	+	Mir212	604	0.00391553	0.159044	0.0353665	0.0372732	15.5128	0.19067	149
chr10	62032449	62035227	6	-	Dph1	-66	0.00835715	0.0980431	0.0945169	0.093143	8.9686	-0.137388	2778
chr10	62035388	62035421	4	+	Rtn4rl1	446	0.00158395	0.0597815	0.0395767	0.0298306	5.81976	-0.974608	33
chr10	62297839	62303814	12	+	Mir6326	0	0.0395866	0.118375	0.110858	0.106613	7.87887	-0.424459	5975
chr10	62623432	62623524	4	+	Taok1	0	0.00696937	0.077976	0.0391722	0.0387186	7.10066	-0.0453638	92
chr10	62648858	62648911	6	-	Abhd15	-15	0.0113728	0.0792392	0.0453529	0.0398074	6.78664	-0.554552	53
chr10	63433612	63455039	6	+	Gosr1	0	0.839451	0.943286	0.872193	0.932782	10.3835	6.05895	21427
chr10	63498919	63498970	3	-	Bhlha9	0	0.00839107	0.18856	0.112898	0.11512	18.0169	0.222144	51
chr10	63551935	63552112	3	+	LOC103693389	0	0.00392079	0.102833	0.0641964	0.0565199	9.89124	-0.767653	177
chr10	63553212	63553238	3	+	LOC103693389	0	0.00364231	0.077699	0.0699897	0.0460894	7.40567	-2.39003	26
chr10	63659858	63676414	14	+	Rilp	0	0.264139	0.385499	0.308294	0.36746	12.136	5.91658	16556
chr10	63801948	63803054	4	+	Myo1c	258	0.00678127	0.0701293	0.0417335	0.050082	6.3348	0.834846	1106
chr10	63884933	63884999	3	+	Ywhae	0	0.00468864	0.109888	0.0656298	0.059854	10.52	-0.577582	66
chr10	64202605	64202862	3	-	Fam101b	-226	0.0399114	0.162629	0.110132	0.100492	12.2718	-0.963982	257
chr10	64360557	64360921	3	+	Fam57a	0	0.0862125	0.216149	0.167426	0.169068	12.9937	0.164215	364
chr10	64861337	64861463	3	-	Phf12	0	0.0448683	0.141259	0.0948168	0.098981	9.63908	0.416416	126
chr10	65080241	65080294	4	+	LOC100360724	0	0.00416634	0.132847	0.0823912	0.0810943	12.8681	-0.129689	53
chr10	65448291	65448329	4	+	Rab34	0	0.00346108	0.0845852	0.0571762	0.0556995	8.11241	-0.147668	38
chr10	65606981	65607037	3	+	Unc119	0	0.0473684	0.18975	0.0949178	0.0952176	14.2382	0.0299771	56
chr10	65806181	65819534	5	+	Ift20	0	0.416968	0.502188	0.515032	0.53738	8.52202	2.23481	13353
chr10	65963970	66020627	8	-	Fam58b	0	0.00300735	0.121797	0.072048	0.0621185	11.879	-0.992952	56657
chr10	66099755	66099842	4	+	Lyrm9	0	0.00576973	0.171901	0.125136	0.0916553	16.6131	-3.34805	87
chr10	66559843	66570705	4	+	LOC685523	-1031	0.0238103	0.112778	0.0759051	0.0744525	8.89681	-0.145261	10862
chr10	67065767	67065818	3	-	Mir193a	68	0.0048652	0.0743325	0.040642	0.0299699	6.94673	-1.06721	51
chr10	67559463	67559549	3	+	Rhot1	0	0.00411219	0.111923	0.0639627	0.0507147	10.7811	-1.3248	86
chr10	67677308	67677348	3	+	Rhbdl3	0	0.00989953	0.0970901	0.0653137	0.0586668	8.71906	-0.664691	40
chr10	67763362	67811354	5	+	Zfp207	0	0.133972	0.216596	0.179631	0.179515	8.26242	-0.0116776	47992
chr10	67811370	67811517	5	+	Psmd11	0	0.00329527	0.163037	0.100943	0.0989878	15.9741	-0.195537	147
chr10	67861895	67861915	3	+	Cdk5r1	140	0.00292723	0.0727298	0.0294453	0.0270142	6.98026	-0.243108	20
chr10	67862049	67862109	4	+	Cdk5r1	0	0.00465063	0.10828	0.0739719	0.069249	10.363	-0.472289	60
chr10	69738042	69738193	13	+	Tmem132e	0	0.0269684	0.103571	0.06967	0.0685366	7.66024	-0.113337	151
chr10	70118322	70118382	3	+	Zfp830	0	0.00208714	0.0981861	0.0813179	0.0846266	9.60989	0.33087	60
chr10	70118414	70118508	4	+	Zfp830	0	0.00218948	0.109773	0.0716776	0.0599801	10.7584	-1.16975	94
chr10	70118537	70134765	9	+	Zfp830	0	0.0902055	0.208333	0.130807	0.132447	11.8128	0.164015	16228
chr10	70134798	70135031	4	+	Lig3	0	0.0326133	0.205494	0.077168	0.0724928	17.2881	-0.467522	233
chr10	70240816	70240956	3	-	Rad51d	0	0	0.0777539	0.0432901	0.0436694	7.77539	0.0379317	140
chr10	70516405	70516481	4	-	Pex12	0	0.0044888	0.117307	0.0825617	0.0703662	11.2818	-1.21955	76
chr10	70681840	70686054	5	-	Mmp28	-169	0.178652	0.253167	0.286327	0.285592	7.45153	-0.0735252	4214
chr10	71160346	71160529	10	+	Hnf1b	0	0.0110033	0.107338	0.0714648	0.0653651	9.63351	-0.609973	183
chr10	71161068	71161142	3	+	Hnf1b	0	0.00617168	0.168202	0.120858	0.107237	16.2031	-1.36209	74
chr10	71963880	71963935	3	+	LOC103693446	-95811	0.0033223	0.0746911	0.0436052	0.0362726	7.13688	-0.733257	55
chr10	72153601	72188492	3	-	Ggnbp2	0	0.00182482	0.141003	0	0	13.9178	0	34891
chr10	72188587	72188904	3	-	Ggnbp2	0	0.00697545	0.0817472	0.0480028	0.033003	7.47717	-1.49998	317
chr10	72544365	72544690	3	-	Appbp2	0	0.0360731	0.100422	0.0741076	0.0617093	6.43493	-1.23982	325
chr10	72544810	72544942	4	-	Appbp2	0	0.000943396	0.0763469	0.0281572	0.0257391	7.54036	-0.241809	132
chr10	72909948	72909994	3	+	Ppm1d	0	0.0421763	0.110658	0.1581	0.166201	6.84817	0.810039	46
chr10	72910094	72910229	3	+	Ppm1d	0	0.00776849	0.122935	0.0704956	0.0883838	11.5167	1.78882	135
chr10	73342094	73342196	3	+	Tbx4	0	0.00432696	0.111497	0.0729167	0.0691282	10.717	-0.378848	102
chr10	73690742	73807053	3	-	Ints2	0	0.257011	0.385818	0.444299	0.457985	12.8807	1.36865	116311
chr10	73865378	73865449	3	-	Rps6kb1	0	0.0746384	0.186937	0.137139	0.130547	11.2299	-0.65914	71
chr10	74298097	74298195	3	-	Ypel2	0	0.0022863	0.175269	0.114517	0.112248	17.2982	-0.226864	98
chr10	74376472	74376494	3	-	Gdpd1	-141	0.00108225	0.125369	0.0557801	0.0654198	12.4287	0.963978	22
chr10	74388264	74436202	4	-	Smg8	0	0.0532852	0.177226	0.153585	0.153152	12.394	-0.0432486	47938
chr10	74679700	74679946	7	-	Ppm1e	0	0.0228025	0.096068	0.0805112	0.0902196	7.32655	0.970842	246
chr10	75270280	75270310	3	-	Dynll2	0	0.00448439	0.0811516	0.0571956	0.0611888	7.66672	0.399324	30
chr10	75335204	75335638	3	+	Srsf1	0	0.00167785	0.114849	0.0526316	0.0689953	11.3171	1.63637	434
chr10	75366100	75366264	4	+	Vezf1	0	0.0777608	0.142783	0.126695	0.141883	6.50221	1.5188	164
chr10	76183667	76183732	3	-	Akap1	0	0.0333525	0.144046	0.103725	0.0977042	11.0694	-0.602032	65
chr10	76407771	76407907	5	-	Dgke	0	0.00181487	0.120134	0.0716782	0.0581875	11.8319	-1.34906	136
chr10	76809664	76810607	6	-	Nog	1153	0.0105652	0.0969096	0.0504985	0.0467878	8.63444	-0.371067	943
chr10	76813283	76813315	5	-	Nog	0	0.00231953	0.0815909	0.0577073	0.0537964	7.92714	-0.391097	32
chr10	81673579	81693594	3	+	LOC103693450	0	0.234217	0.334005	0.292932	0.288697	9.97873	-0.423473	20015
chr10	82026628	82026718	5	-	Luc7l3	0	0.0268384	0.106756	0.0804267	0.0727819	7.99175	-0.764477	90
chr10	82027098	82027151	6	-	Luc7l3	0	0.000603865	0.0778106	0.0577536	0.0463721	7.72067	-1.13816	53
chr10	82116525	82116685	4	-	Abcc3	0	0.00485058	0.108606	0.0654312	0.0582936	10.3756	-0.713756	160
chr10	82129596	82130488	8	-	Cacna1g	0	0.179576	0.271455	0.21372	0.153584	9.18785	-6.01357	892
chr10	82139428	82144186	8	-	Cacna1g	0	0.570119	0.620705	0.634219	0.599876	5.05863	-3.4343	4758
chr10	82197692	82197764	5	-	Cacna1g	0	0.00633702	0.0894223	0.0780787	0.0768586	8.30852	-0.122009	72
chr10	82198043	82198120	7	-	Cacna1g	-181	0.00417113	0.0908486	0.0668537	0.0637609	8.66774	-0.309274	77
chr10	82399151	82399270	3	-	Xylt2	0	0.00576306	0.152853	0.0595885	0.0618355	14.709	0.224703	119
chr10	82887386	82887595	7	-	Itga3	0	0.0442925	0.133332	0.0942656	0.0869751	8.90398	-0.729059	209
chr10	82938667	82938770	4	+	Dlx3	0	0.00723783	0.155014	0.101908	0.100389	14.7776	-0.151837	103
chr10	82938801	82939244	4	+	Dlx3	0	0.00906427	0.131593	0.037296	0.0354358	12.2529	-0.18602	443
chr10	82963849	82964198	7	-	Dlx4	0	0.00524565	0.0935793	0.0573533	0.0590012	8.83336	0.164789	349
chr10	83079161	83128865	22	-	LOC103693422	0	0.203743	0.256337	0.264774	0.262048	5.25943	-0.272543	49704
chr10	83333164	83333461	3	-	Nxph3	-236	0.0100513	0.0922133	0.0181869	0.0180764	8.2162	-0.0110512	297
chr10	83604231	83604280	3	-	LOC102547047	0	0.0902687	0.198297	0.162736	0.153167	10.8028	-0.956906	49
chr10	83636573	83636683	3	+	Phospho1	0	0.0444348	0.177196	0.197509	0.184169	13.2761	-1.33398	110
chr10	83807873	83808307	7	-	Igf2bp1	0	0.0265966	0.0999472	0.0658788	0.0764649	7.33506	1.05861	434
chr10	83841235	83856218	4	+	Gip	0	0.590612	0.533488	0.860054	0.884809	-5.71232	2.47547	14983
chr10	83888733	83888815	5	-	Ube2z	0	0.0290713	0.10079	0.0554934	0.0497098	7.17186	-0.578363	82
chr10	83888851	83888925	3	-	Ube2z	-29	0.181576	0.263462	0.173115	0.163723	8.18866	-0.939214	74
chr10	84014775	84031240	11	+	Hoxb13	716	0.0474305	0.132295	0.0608173	0.065909	8.4865	0.509167	16465
chr10	84120374	84120556	5	+	Hoxb9	0	0.00356974	0.191146	0.124919	0.140231	18.7576	1.53122	182
chr10	84135601	84135889	6	+	Hoxb7	0	0.0124542	0.0939312	0.0686931	0.0619374	8.14771	-0.67557	288
chr10	84153082	84163585	28	+	Hoxb5	0	0.193133	0.285067	0.199412	0.204957	9.19338	0.554497	10503
chr10	84182184	84189053	14	+	Hoxb3	0	0.35617	0.40684	0.549643	0.550981	5.06698	0.133775	6869
chr10	84195095	84197498	7	+	Hoxb3	0	0.012259	0.113319	0.105489	0.105782	10.106	0.0293023	2403
chr10	84202395	84202490	3	+	Hoxb2	0	0.00501303	0.144817	0.120297	0.120986	13.9804	0.0689407	95
chr10	84639205	84639310	6	-	Snx11	-80	0.0035655	0.114748	0.0602077	0.051224	11.1182	-0.898369	105
chr10	84945925	84955754	15	+	Sp6	111	0.232427	0.324269	0.235696	0.244961	9.18418	0.926489	9829
chr10	84956033	84962885	26	+	Sp6	0	0.0469822	0.135903	0.115759	0.115237	8.89208	-0.0521546	6852
chr10	85123983	85124114	4	-	Kpnb1	0	0.00252556	0.0722133	0.0471397	0.0354941	6.96877	-1.16456	131
chr10	85343759	85343844	5	+	Socs7	-5789	0.00190958	0.132987	0.102687	0.0873025	13.1078	-1.53844	85
chr10	85477993	85489901	10	-	Srcin1	0	0.530063	0.596532	0.524816	0.526383	6.6469	0.156731	11908
chr10	85573780	85573801	3	-	LOC691153	0	0.0113636	0.12953	0.082692	0.0712758	11.8167	-1.14162	21
chr10	85574026	85574074	3	-	LOC691153	0	0.00447868	0.127647	0.0734793	0.0632894	12.3169	-1.01899	48
chr10	85574263	85574363	6	-	LOC691153	0	0.00567866	0.0917234	0.0665615	0.0719513	8.60447	0.53898	100
chr10	85642530	85642556	3	-	Pcgf2	0	0.00531915	0.107262	0.0565789	0.0624859	10.1943	0.590698	26
chr10	85744839	85745126	4	+	Lasp1	0	0.00677318	0.118839	0.11436	0.0808562	11.2066	-3.3504	287
chr10	85745588	85745885	3	+	Lasp1	0	0.00568141	0.210638	0.0934974	0.0916856	20.4957	-0.181182	297
chr10	86157539	86158255	4	+	Cdk12	0	0.0047803	0.095229	0.0661128	0.0552067	9.04487	-1.09061	716
chr10	86251302	86251328	4	+	LOC257650	-14419	0.00345862	0.0837332	0.0827723	0.0684548	8.02746	-1.43174	26
chr10	86282938	86283102	7	-	Neurod2	-258	0.0642791	0.13107	0.115798	0.112272	6.67904	-0.352634	164
chr10	86288704	86293959	7	-	Neurod2	-6024	0.0690036	0.168522	0.115334	0.111976	9.95186	-0.335777	5255
chr10	86294328	86297857	13	+	Ppp1r1b	5871	0.0159642	0.0894878	0.0667443	0.0624076	7.35236	-0.433668	3529
chr10	86303917	86304002	5	+	Ppp1r1b	0	0.0653422	0.137014	0.108515	0.113328	7.16715	0.481357	85
chr10	86313506	86313558	3	+	Stard3	0	0.00518451	0.16743	0.107404	0.0910515	16.2245	-1.63529	52
chr10	86367719	86367763	3	+	Erbb2	0	0.00810307	0.0963475	0.0585678	0.0527238	8.82444	-0.584397	44
chr10	86368025	86368136	3	+	Erbb2	0	0.0036419	0.149043	0.049835	0.0387713	14.5401	-1.10637	111
chr10	86509539	86514813	4	+	Zpbp2	0	0.00708612	0.133678	0.059209	0.0515448	12.6592	-0.766429	5274
chr10	86551987	86599252	39	-	Ormdl3	0	0.365667	0.420022	0.412752	0.431186	5.43544	1.84339	47265
chr10	86599278	86599372	3	+	Psmd3	0	0.0026115	0.13213	0.129248	0.11576	12.9519	-1.34885	94
chr10	86689815	86690018	3	-	Nr1d1	0	0.00233284	0.136583	0.0912552	0.0893303	13.425	-0.192485	203
chr10	86690368	86701609	18	-	Nr1d1	0	0.155033	0.265345	0.189061	0.210876	11.0312	2.1815	11241
chr10	86803824	86819550	14	+	Wipf2	0	0.499014	0.678759	0.564454	0.660235	17.9745	9.57811	15726
chr10	86838729	86839120	6	+	Cdc6	-5429	0.0601338	0.122481	0.10875	0.0966044	6.23472	-1.21453	391
chr10	86848994	86849042	3	+	Rara	11990	0.00484332	0.09925	0.104926	0.084801	9.44067	-2.01252	48
chr10	86869499	86869618	4	+	Rara	0	0.0139657	0.16647	0.0860683	0.0768338	15.2504	-0.923445	119
chr10	86870186	86870310	4	+	Rara	0	0.0391542	0.168222	0.0343854	0.0356597	12.9068	0.127429	124
chr10	86889980	86890055	5	-	Gjd3	0	0.0360489	0.106643	0.0982086	0.07599	7.05943	-2.22186	75
chr10	87137391	87137746	4	-	Smarce1	0	0.00438728	0.107581	0.0713751	0.0590704	10.3194	-1.23047	355
chr10	87137910	87137931	3	-	Smarce1	0	0.0367814	0.133723	0.113439	0.0987654	9.69419	-1.46737	21
chr10	87381555	87430999	11	-	Krt23	0	0.503161	0.5606	0.355219	0.335049	5.74388	-2.01695	49444
chr10	88490734	88490775	4	+	Cnp	0	0.00297258	0.0976985	0.0817644	0.0650183	9.47259	-1.67461	41
chr10	88667301	88667680	4	-	Kcnh4	0	0.0877768	0.198799	0.121702	0.102428	11.1023	-1.9274	379
chr10	88754914	88755041	3	+	Stat5a	9692	0.102939	0.187832	0.295455	0.270968	8.4893	-2.44868	127
chr10	88755097	88755156	5	+	Stat5a	9577	0.00465785	0.0829179	0.0491087	0.0516168	7.826	0.250812	59
chr10	88979360	88979408	4	+	Naglu	0	0.00654535	0.0979359	0.0646565	0.0595611	9.13905	-0.509536	48
chr10	88997534	89005146	5	+	Mlx	0	0.177991	0.295302	0.24277	0.248746	11.7312	0.597577	7612
chr10	89005172	89005333	6	-	Psmc3ip	0	0.0531491	0.170892	0.130427	0.126777	11.7743	-0.365015	161
chr10	89030485	89030634	5	-	Fam134c	0	0.00565733	0.172393	0.10228	0.0992356	16.6736	-0.304417	149
chr10	89084496	89084673	7	-	Plekhh3	0	0.0271399	0.140903	0.112906	0.110563	11.3763	-0.234317	177
chr10	89088228	89089927	8	+	Cntnap1	0	0.0787245	0.1588	0.127319	0.122118	8.00757	-0.520081	1699
chr10	89181458	89181538	3	+	Wnk4	0	0.00386402	0.123311	0.0799332	0.0717751	11.9447	-0.815815	80
chr10	89225137	89225240	4	-	Becn1	0	0.00507468	0.105138	0.0562673	0.0557696	10.0063	-0.0497719	103
chr10	89225262	89235936	4	-	Becn1	0	0.00638055	0.14012	0.0976183	0.0680718	13.374	-2.95464	10674
chr10	89374331	89374365	4	-	Vat1	0	0.00585568	0.104604	0.067359	0.0602007	9.87484	-0.715835	34
chr10	89700116	89700269	4	-	Etv4	0	0.00249754	0.179489	0.112614	0.100874	17.6992	-1.17393	153
chr10	89700437	89722577	4	-	LOC681360	0	0.0801657	0.164555	0.127844	0.109909	8.43897	-1.79348	22140
chr10	90085765	90085809	3	+	Nags	0	0.0106889	0.123565	0.00589971	0	11.2876	-0.589971	44
chr10	90186060	90189389	5	+	LOC303566	3219	0.0461276	0.149636	0.118894	0.0922131	10.3508	-2.6681	3329
chr10	90265420	90265571	7	-	Ubtf	0	0.0048602	0.138269	0.0604529	0.0483595	13.3409	-1.20934	151
chr10	90983988	90989992	12	+	Ccdc103	0	0.17738	0.258411	0.24521	0.244124	8.10308	-0.108631	6004
chr10	91046124	91046778	5	-	C1ql1	0	0.00705308	0.059067	0.0421053	0.0343354	5.2014	-0.776984	654
chr10	91046825	91047065	4	-	C1ql1	0	0.0601436	0.169756	0.13064	0.12701	10.9612	-0.36298	240
chr10	91047303	91049078	6	-	C1ql1	-127	0.0260635	0.15272	0.108752	0.109081	12.6657	0.0329437	1775
chr10	91117765	91117807	3	-	Dcakd	0	0.0989688	0.199949	0.183616	0.172693	10.098	-1.0923	42
chr10	91185996	91186413	3	-	Plcd3	0	0.00416171	0.173957	0.115023	0.114961	16.9795	-0.0062379	417
chr10	91221944	91253602	24	+	Hexim2	0	0.628098	0.746073	0.793958	0.906273	11.7975	11.2316	31658
chr10	91448518	91451012	15	-	Arhgap27	0	0.0547502	0.127554	0.119084	0.112034	7.28042	-0.704958	2494
chr10	91807802	91807920	4	-	Wnt9b	0	0.00400158	0.089151	0.119159	0.0979899	8.51494	-2.11689	118
chr10	91850195	91852771	5	+	Wnt3	0	0.20716	0.0848263	0.197165	0.0744416	-12.2333	-12.2723	2576
chr10	92008145	92008192	3	+	Arf2	10371	0.0767002	0.131572	0.10174	0.109964	5.4872	0.822442	47
chr10	92191242	92191563	3	+	Crhr1	156	0.0729254	0.192139	0.144212	0.156863	11.9214	1.26505	321
chr10	92264261	92268233	4	-	LOC103693462	-2132	0.763168	0.885781	0.73709	0.797552	12.2613	6.04615	3972
chr10	92288867	92288927	3	+	Mapt	36	0.00149254	0.0906237	0.0514706	0.0574597	8.91311	0.598909	60
chr10	92290048	92290184	6	+	Mapt	0	0.00674848	0.0733085	0.0566667	0.0556459	6.656	-0.102078	136
chr10	94231894	94232194	3	+	Dcaf7	0	0.00469603	0.158717	0.108439	0.102519	15.4021	-0.592016	300
chr10	94260190	94280691	10	+	Taco1	0	0.114365	0.261924	0.286913	0.239575	14.7559	-4.73381	20501
chr10	94281319	94352460	4	+	Map3k3	0	0.0561539	0.122447	0.0629805	0.0652843	6.62932	0.230375	71141
chr10	94352531	94352558	3	-	Limd2	0	0.00280803	0.103302	0.0662531	0.0609159	10.0494	-0.53372	27
chr10	94459473	94460545	3	-	Smarcd2	0	0.178705	0.321397	0.30059	0.244518	14.2692	-5.6072	1072
chr10	94460580	94460609	3	-	Smarcd2	0	0.00227848	0.097327	0.0659219	0.0594262	9.50485	-0.649569	29
chr10	94460672	94460710	5	-	Smarcd2	0	0.00365452	0.0756676	0.0452531	0.054042	7.20131	0.878885	38
chr10	94681680	94681829	3	-	Ern1	0	0.0637574	0.188127	0.132687	0.125751	12.4369	-0.693585	149
chr10	94978812	94978862	3	-	Polg2	0	0.0041094	0.103825	0.0787587	0.0493011	9.97156	-2.94576	50
chr10	94987198	94987348	8	-	Ddx5	0	0.0245652	0.100016	0.0747125	0.0712533	7.54504	-0.345925	150
chr10	95696330	95696346	3	-	Pitpnc1	0	0.0672227	0.126641	0.109315	0.106727	5.94181	-0.258732	16
chr10	95696369	95696582	5	-	Pitpnc1	0	0.0714837	0.202914	0.138728	0.136496	13.143	-0.223144	213
chr10	95767787	95768228	7	+	Helz	482	0.0240062	0.0932041	0.0858752	0.0802807	6.91979	-0.559443	441
chr10	95768662	95768888	3	+	Helz	0	0.00408692	0.0765614	0.137532	0.148601	7.24744	1.10693	226
chr10	95769076	95769134	5	+	Helz	0	0.00192638	0.117257	0.0813262	0.0813667	11.5331	0.00404826	58
chr10	96584705	96584809	6	-	Prkca	0	0.00511127	0.108667	0.0339912	0.0228889	10.3556	-1.11023	104
chr10	96663647	96663703	4	+	Cep112	4	0.00469457	0.0755716	0.0649676	0.0533604	7.0877	-1.16073	56
chr10	97210801	97210842	4	+	Axin2	1642	0.0235961	0.143374	0.11802	0.0907526	11.9778	-2.72675	41
chr10	97210868	97210900	3	+	Axin2	1584	0.0708491	0.119926	0.161538	0.21745	4.90771	5.59118	32
chr10	97210961	97211014	3	+	Axin2	1470	0.00341482	0.121092	0	0	11.7677	0	53
chr10	97211047	97211958	10	+	Axin2	526	0.0339347	0.123803	0.0663831	0.0616631	8.98684	-0.472001	911
chr10	97646831	97646857	3	+	Gna13	340	0.002	0.110144	0.0963855	0.0957699	10.8144	-0.0615609	26
chr10	97722911	97724296	3	+	Arsg	0	0.150395	0.333648	0.269818	0.265341	18.3253	-0.447717	1385
chr10	97757104	97757151	5	-	Slc16a6	0	0.00251929	0.0648568	0.0459893	0.0481681	6.23375	0.217874	47
chr10	97895749	97896345	3	-	Wipi1	0	0.0091231	0.142242	0.0931171	0.0849884	13.3119	-0.812863	596
chr10	97896518	97941103	21	-	Wipi1	0	0.424556	0.478522	0.384358	0.364548	5.39665	-1.98093	44585
chr10	102136011	102136341	3	-	Slc39a11	0	0.0023208	0.107987	0.261603	0.268868	10.5666	0.726455	330
chr10	102200076	102200230	3	+	MGC95210	0	0.00705655	0.0985764	0.0450122	0.0652066	9.15198	2.01944	154
chr10	102576807	102576895	3	-	Sdk2	0	0.00587302	0.0914561	0.110468	0.146452	8.55831	3.59836	88
chr10	103196421	103196519	3	+	Rpl38	1906	0.015952	0.147008	0.107603	0.113221	13.1056	0.561836	98
chr10	103206137	103206468	3	+	Ttyh2	0	0.00353177	0.0964753	0.0544041	0.0509259	9.29435	-0.347822	331
chr10	103395992	103396213	3	+	Gprc5c	0	0.0180683	0.13585	0.216861	0.219975	11.7782	0.311409	221
chr10	103713600	103714060	5	+	Slc9a3r1	0	0.00376657	0.118483	0.07622	0.0747054	11.4717	-0.151467	460
chr10	103799240	103799347	5	-	Grin2c	0	0.0527459	0.116448	0.0877825	0.0838239	6.37024	-0.395868	107
chr10	103870264	103873308	11	-	Ush1g	0	0.0542926	0.147332	0.134084	0.115861	9.30392	-1.82232	3044
chr10	103919168	103919519	8	-	Hid1	0	0.067982	0.151728	0.15549	0.144301	8.37456	-1.11891	351
chr10	103919544	103919658	3	-	Hid1	0	0.0685487	0.197945	0.112397	0.118824	12.9396	0.642721	114
chr10	103927194	103934380	8	+	Cdr2l	0	0.137783	0.253638	0.12634	0.138238	11.5855	1.18981	7186
chr10	103934719	103935193	4	+	Cdr2l	0	0.0293225	0.129098	0.0967193	0.0860662	9.97752	-1.0653	474
chr10	103937724	103954023	28	+	Cdr2l	0	0.599809	0.660979	0.662899	0.693662	6.11701	3.07631	16299
chr10	103956263	103972682	18	+	Mrpl58	0	0.0861488	0.154249	0.13968	0.137289	6.81003	-0.239112	16419
chr10	103973140	103973179	3	+	Kctd2	0	0.00519874	0.127541	0.0856463	0.0729597	12.2343	-1.26865	39
chr10	104036427	104036562	3	+	Armc7	0	0.00389417	0.118639	0.100123	0.0718563	11.4745	-2.82662	135
chr10	104054744	104054797	3	-	Nt5c	0	0.0690078	0.162473	0.133921	0.12389	9.34651	-1.00311	53
chr10	104097345	104118751	3	-	Sumo2	0	0.10239	0.21374	0.165113	0.161824	11.135	-0.32886	21406
chr10	104263036	104263311	5	-	Grb2	0	0.00504574	0.103149	0.0602752	0.0462949	9.81028	-1.39803	275
chr10	104523847	104524212	4	+	Itgb4	0	0.0201364	0.139791	0.106971	0.0897425	11.9654	-1.72284	365
chr10	104650835	104658635	17	+	LOC102552044	0	0.657292	0.749041	0.726982	0.752224	9.17488	2.52419	7800
chr10	104688982	104689028	3	-	Mrpl38	0	0.054108	0.164884	0.107541	0.116043	11.0776	0.850137	46
chr10	105368103	105368155	4	-	Rnf157	0	0.00641551	0.0736615	0.0535071	0.053724	6.7246	0.0216976	52
chr10	105451982	105452007	3	-	Prpsap1	0	0.00313283	0.0958228	0.0541202	0.0537791	9.269	-0.0341105	25
chr10	105452020	105452083	4	-	Prpsap1	0	0.00111111	0.0646381	0.0456539	0.0397226	6.3527	-0.593122	63
chr10	105498723	105499582	7	+	Sphk1	0	0.01722	0.129783	0.0933605	0.0863789	11.2563	-0.698158	859
chr10	105499624	105499667	3	+	Sphk1	0	0.00281955	0.0785709	0.042831	0.0533361	7.57513	1.05051	43
chr10	105600857	105600922	5	-	Rhbdf2	0	0.00554086	0.106589	0.0697315	0.0578036	10.1048	-1.19279	65
chr10	105754754	105771641	19	+	LOC103693479	0	0.572673	0.666634	0.570618	0.648812	9.3961	7.81941	16887
chr10	105771687	105771757	4	-	Mxra7	0	0.0066736	0.121973	0.0760993	0.0770958	11.53	0.0996507	70
chr10	105787273	105787314	3	-	Jmjd6	0	0.00357711	0.184986	0.116624	0.0934066	18.1408	-2.32178	41
chr10	106021901	106065735	5	+	LOC100912002	0	0.426409	0.510862	0.600986	0.591232	8.44533	-0.975396	43834
chr10	106782844	106783103	3	-	Tmc6	0	0.00263898	0.122609	0.06036	0.051	11.997	-0.936003	259
chr10	106812923	106812973	3	+	Syngr2	0	0.00369573	0.121484	0.0752578	0.0660094	11.7788	-0.924838	50
chr10	106812982	106813027	6	+	Syngr2	0	0.00429078	0.0724974	0.0667807	0.0690265	6.82066	0.224588	45
chr10	106994817	106994879	5	+	Pgs1	0	0.00745384	0.0961944	0.0296175	0.0453505	8.87406	1.5733	62
chr10	107320093	107323842	4	-	Usp36	0	0.278718	0.384386	0.332593	0.340948	10.5669	0.835594	3749
chr10	107445610	107445652	5	-	Cant1	0	0.00305734	0.0771011	0.039807	0.0457824	7.40438	0.597543	42
chr10	108055062	108055168	4	+	Ccdc40	103	0.108167	0.173537	0.147015	0.139616	6.53702	-0.739878	106
chr10	108132390	108132488	4	+	Cbx2	0	0.0499235	0.163858	0.112748	0.113229	11.3935	0.0480713	98
chr10	108145509	108151094	23	+	Ccdc40	0	0.471662	0.544653	0.454954	0.498344	7.29906	4.33892	5585
chr10	108166336	108166427	3	+	Ccdc40	0	0.138503	0.242779	0.128771	0.12152	10.4276	-0.725108	91
chr10	108166574	108175325	10	+	Ccdc40	0	0.24926	0.374549	0.400595	0.423056	12.5289	2.24605	8751
chr10	108396073	108396175	6	+	Gaa	0	0.00238919	0.112075	0.0660936	0.0661986	10.9686	0.0104987	102
chr10	108524963	108525002	3	+	Rnf213	16264	0.157144	0.223697	0.197679	0.202708	6.65527	0.50286	39
chr10	108691815	108691933	3	-	LOC102551433	0	0.00560356	0.0969378	0.0558028	0.0500492	9.13343	-0.575367	118
chr10	109107435	109107516	4	+	Baiap2	0	0.0318248	0.102285	0.0683197	0.0761855	7.04601	0.786573	81
chr10	109418773	109420067	6	+	Bahcc1	4242	0.00291764	0.125186	0.0836524	0.0735647	12.2268	-1.00877	1294
chr10	109420124	109420178	3	+	Bahcc1	4131	0.00180995	0.168336	0.0758482	0.0771328	16.6526	0.128458	54
chr10	109501093	109505070	3	+	LOC102546528	110	0.061675	0.180359	0.165097	0.132857	11.8684	-3.22405	3977
chr10	109629976	109630021	3	-	Oxld1	0	0.0464525	0.131662	0.0803755	0.0798908	8.52094	-0.0484768	45
chr10	109630054	109630152	5	+	Ccdc137	0	0.00368453	0.106319	0.0772884	0.0768332	10.2634	-0.0455189	98
chr10	109658184	109658869	7	+	Mrpl12	0	0.00624341	0.103292	0.057644	0.0475157	9.7049	-1.01283	685
chr10	109727602	109727631	3	-	Mcrip1	-57	0.00184162	0.0681957	0.0820896	0.069617	6.63541	-1.24726	29
chr10	109748166	109748366	6	-	P4hb	-205	0.0035205	0.0897513	0.0558976	0.0424558	8.62308	-1.34419	200
chr10	109795521	109795602	4	-	Pcyt2	0	0.00350111	0.0939607	0.0316794	0.0254302	9.04596	-0.624919	81
chr10	109802435	109802519	3	-	Sirt7	0	0.00668095	0.0997598	0.0565333	0.0576188	9.30789	0.108548	84
chr10	109908607	109909406	5	-	Dcxr	0	0.104795	0.16923	0.13774	0.149841	6.4435	1.21006	799
chr10	109966852	109966983	3	+	Gps1	0	0.00225994	0.145179	0.0790816	0.0934694	14.2919	1.43877	131
chr10	109966997	109967021	3	+	Gps1	0	0.00613559	0.0837966	0.0747158	0.0447529	7.7661	-2.99629	24
chr10	110181878	110181905	3	-	Csnk1d	0	0.00114679	0.108806	0.0761334	0.0559701	10.7659	-2.01632	27
chr10	110406492	110406541	3	+	Hexdc	0	0.00912157	0.165113	0.113658	0.0918507	15.5991	-2.1807	49
chr10	110585363	110614515	6	-	Rab40b	0	0.0457811	0.151475	0.148115	0.149059	10.5694	0.0944625	29152
chr11	1818725	1895364	8	-	MGC95208	0	0.00336883	0.108883	0.134252	0.131227	10.5514	-0.302541	76639
chr11	1895403	1895519	3	-	Zfp654	0	0.0429969	0.182294	0.137853	0.122335	13.9297	-1.55185	116
chr11	1895530	1895587	3	-	Zfp654	0	0.00256956	0.127691	0.0571451	0.0527092	12.5121	-0.443588	57
chr11	1896204	1896232	3	+	Cggbp1	0	0.0034188	0.120378	0	0	11.696	0	28
chr11	2691786	2691872	3	-	Chmp2b	0	0.00562481	0.1552	0.0789276	0.063981	14.9576	-1.49465	86
chr11	7210371	7226655	8	+	Gbe1	0	0.243982	0.348071	0.17452	0.18001	10.4089	0.549006	16284
chr11	15436272	15436288	3	+	Usp25	0	0.00502513	0.122045	0.0962783	0.0743243	11.702	-2.1954	16
chr11	16826374	16826535	7	+	Cxadr	0	0.00360988	0.0794912	0.0529528	0.0511287	7.58814	-0.182407	161
chr11	20221896	20221963	3	+	Ncam2	0	0.00523785	0.122022	0.0865261	0.0711358	11.6784	-1.53903	67
chr11	25351931	25419620	11	-	Adamts5	0	0.124544	0.207302	0.203806	0.194685	8.27582	-0.912049	67689
chr11	27094225	27101147	4	-	Rwdd2b	0	0.0361315	0.15723	0.111887	0.110428	12.1098	-0.1459	6922
chr11	27141557	27141612	3	-	Cct8	0	0.0496855	0.157005	0.251598	0.260698	10.7319	0.910007	55
chr11	30977175	30977261	6	-	Urb1	0	0.00492051	0.110997	0.0653905	0.0665746	10.6076	0.118413	86
chr11	31002502	31002791	9	+	Eva1c	0	0.00355411	0.0996864	0.0637745	0.059763	9.61323	-0.401152	289
chr11	31181789	31182020	3	-	Synj1	-217	0.128448	0.240623	0.0685849	0.0497698	11.2175	-1.88151	231
chr11	31213336	31213388	3	-	Paxbp1	0	0.00682957	0.100532	0.121951	0.0924171	9.37024	-2.95342	52
chr11	31213645	31213698	5	-	Paxbp1	0	0.00110622	0.0809049	0.0363189	0.0319333	7.97987	-0.438562	53
chr11	31386692	31386847	7	+	Olig2	2668	0.027206	0.129545	0.0935046	0.0924188	10.2339	-0.108583	155
chr11	31751992	31752021	4	-	Tmem50b	0	0.0880668	0.162232	0.135494	0.138803	7.41653	0.330813	29
chr11	31752095	31752181	5	-	Tmem50b	0	0.00301205	0.077301	0.036926	0.0373445	7.4289	0.041854	86
chr11	31752187	31752263	5	-	Tmem50b	0	0.00269636	0.121166	0.0747985	0.0662456	11.847	-0.855282	76
chr11	31806103	31806492	3	+	Son	109	0.0690652	0.164496	0.266949	0.242718	9.54311	-2.42307	389
chr11	31847287	31847370	6	-	Donson	0	0.00349207	0.100423	0.0652599	0.0499598	9.69308	-1.53001	83
chr11	31847514	31847558	5	-	Donson	-25	0.0627394	0.123416	0.0924219	0.0925089	6.06763	0.00869254	44
chr11	31847569	31847651	4	-	Donson	-80	0.015031	0.114544	0.119819	0.124097	9.95126	0.427843	82
chr11	32087907	32105396	5	-	Atp5o	0	0.243129	0.326278	0.189651	0.191606	8.31493	0.19551	17489
chr11	32211000	32211064	4	+	Mrps6	0	0.00274395	0.108069	0.0571462	0.0594684	10.5325	0.232223	64
chr11	33909913	33925504	10	+	Cbr3	0	0.0921916	0.209645	0.209257	0.189181	11.7453	-2.00763	15591
chr11	34052025	34052061	4	+	Morc3	0	0.00350963	0.0800784	0.0545236	0.0450552	7.65687	-0.946838	36
chr11	34101046	34101362	3	+	Chaf1b	0	0.00604909	0.156838	0.0649482	0.0690683	15.0789	0.412011	316
chr11	34316593	34317357	6	+	Sim2	0	0.0520289	0.152063	0.0657906	0.067251	10.0034	0.146039	764
chr11	34353806	34353865	3	+	Sim2	0	0.00596937	0.164167	0.108343	0.085027	15.8198	-2.33164	59
chr11	34558077	34558883	3	+	Ripply3	0	0.112447	0.145517	0.165051	0.113569	3.30706	-5.14825	806
chr11	36546630	36546871	5	-	Lca5l	0	0.00576062	0.14297	0.0957762	0.0807003	13.7209	-1.50759	241
chr11	36642290	36642437	6	+	B3galt5	0	0.00853712	0.142629	0.0953428	0.0970322	13.4092	0.168932	147
chr11	38103231	38103309	5	-	Tmprss2	0	0.00567433	0.0819975	0.078771	0.0744454	7.63232	-0.432559	78
chr11	38103376	38103509	4	-	Tmprss2	0	0.028527	0.145441	0.0971303	0.0963839	11.6914	-0.0746398	133
chr11	38273882	38274250	4	-	Ripk4	0	0.0879304	0.1676	0.092653	0.0985888	7.96698	0.593576	368
chr11	38351461	38351522	4	-	Prdm15	-422	0.038485	0.140079	0.141418	0.150685	10.1594	0.926647	61
chr11	38456950	38457480	3	-	Zfp295	0	0.00232746	0.0929653	0.0634534	0.0627152	9.06379	-0.073819	530
chr11	41868220	41868447	3	-	LOC102556000	6412	0.00699231	0.124476	0.0828782	0.063308	11.7484	-1.95702	227
chr11	41869243	41869745	5	-	LOC102556000	5114	0.00625673	0.0883841	0.0487814	0.040195	8.21274	-0.858641	502
chr11	42858785	42895554	7	+	Arl6	0	0.00749596	0.108719	0.0730007	0.0675057	10.1223	-0.5495	36769
chr11	43065534	43086379	3	-	Gabrr3	0	0.299164	0.453452	0.464837	0.474533	15.4288	0.96961	20845
chr11	43992245	43992625	3	-	Cldnd1	0	0.00438163	0.115144	0.0348415	0.033144	11.0762	-0.169751	380
chr11	44049437	44049468	3	-	Cpox	0	0.00609756	0.124656	0	0	11.8559	0	31
chr11	45510657	45511220	7	-	Tomm70	0	0.00531201	0.10862	0.073834	0.0620212	10.3308	-1.18128	563
chr11	47047329	47055660	8	+	LOC102552047	0	0.00777658	0.105645	0.0578002	0.0552871	9.78687	-0.25131	8331
chr11	47055989	47056178	7	+	Pcnp	0	0.00857135	0.11649	0.0856855	0.0904876	10.7918	0.480208	189
chr11	47122194	47146518	7	+	Cep97	0	0.0416994	0.15478	0.136379	0.126976	11.308	-0.940218	24324
chr11	53574664	53574878	3	-	Cd47	0	0.00128205	0.160267	0.0471723	0.0427306	15.8985	-0.444176	214
chr11	53731756	53731794	4	-	Ift57	0	0.0027972	0.0966117	0.0602666	0.0470309	9.38145	-1.32357	38
chr11	57993191	57993233	4	-	Nectin3	0	0.00241694	0.0807055	0.0526481	0.0493976	7.82886	-0.325049	42
chr11	58081984	58151482	5	+	LOC501780	0	0.0445133	0.131988	0.107982	0.067018	8.74747	-4.09641	69498
chr11	58959467	58959536	3	-	Lsamp	0	0.116347	0.185228	0.190146	0.13165	6.88808	-5.84961	69
chr11	60612974	60613441	6	-	Atg3	0	0.0228865	0.139128	0.10068	0.0895464	11.6242	-1.11336	467
chr11	60613646	60613740	3	-	Atg3	0	0.0555077	0.185083	0.142347	0.141924	12.9575	-0.0422539	94
chr11	60907489	60931385	5	+	Gtpbp8	0	0.00496853	0.0962192	0.0321257	0.0214599	9.12507	-1.06658	23896
chr11	61294224	61321367	3	+	Sidt1	0	0.00397732	0.141425	0.187965	0.196562	13.7448	0.859652	27143
chr11	61661933	61662003	5	+	Zdhhc23	0	0.00117436	0.12328	0.0870322	0.0683842	12.2106	-1.86479	70
chr11	61748854	61748900	3	+	Qtrt2	0	0.000954198	0.0886319	0.0601266	0.0866171	8.76777	2.64905	46
chr11	64421165	64421199	4	-	Igsf11	0	0.00458983	0.0856082	0	0	8.10183	0	34
chr11	65209495	65210515	4	-	Gsk3b	0	0.00391406	0.138867	0.116709	0.0985752	13.4953	-1.81335	1020
chr11	65759748	65759805	3	-	Lrrc58	-191	0.0905329	0.200337	0.150063	0.127022	10.9804	-2.30408	57
chr11	65759860	65759892	3	-	Lrrc58	-303	0.00480769	0.141831	0.101861	0.0902381	13.7023	-1.16226	32
chr11	65845402	65845483	3	-	Fstl1	-28	0.0033986	0.112176	0.120395	0.0933746	10.8777	-2.70209	81
chr11	66819008	66819420	3	-	Golgb1	0	0.0017027	0.106885	0.0696215	0.0687822	10.5182	-0.083933	412
chr11	66896677	67036930	21	+	Eaf2	0	0.355655	0.411019	0.428051	0.407235	5.53645	-2.08154	140253
chr11	67717307	67717329	3	-	Kpna1	0	0.00452464	0.108145	0.107796	0.106725	10.362	-0.107059	22
chr11	68434172	68434297	3	-	Sema5b	0	0.00521536	0.0849324	0.0378446	0.0383468	7.9717	0.0502273	125
chr11	68842939	68843225	4	-	Adcy5	-447	0.0658587	0.152059	0.0746113	0.0670369	8.62007	-0.757446	286
chr11	69914827	69917026	6	+	Kalrn	0	0.379924	0.474115	0.395119	0.38875	9.41904	-0.636894	2199
chr11	70834013	70841097	6	-	Osbpl11	0	0.238721	0.361521	0.316692	0.308575	12.28	-0.811677	7084
chr11	71143510	71151066	3	+	Rubcn	0	0.00389098	0.152111	0.100606	0.0771481	14.822	-2.34575	7556
chr11	71591716	71694350	9	-	Pcyt1a	0	0.159273	0.281741	0.230376	0.223023	12.2469	-0.735323	102634
chr11	72103175	72103735	5	-	Pigz	0	0.00693129	0.155721	0.0962317	0.0956575	14.879	-0.0574191	560
chr11	72521909	72532674	3	+	LOC102550974	5753	0.34322	0.495847	0.449349	0.444798	15.2627	-0.455031	10765
chr11	73079521	73079550	3	+	Acap2	0	0	0.100969	0.0592633	0.0560184	10.0969	-0.324485	29
chr11	73679481	73679508	3	-	Fam43a	-479	0.00261809	0.110877	0.172956	0.133065	10.8259	-3.98915	27
chr11	73904863	73936407	8	+	LOC103693592	0	0.545782	0.610623	0.52792	0.531321	6.48411	0.340117	31544
chr11	73937058	73937372	5	+	Atp13a3	0	0.010336	0.160265	0.111324	0.0970816	14.9929	-1.42425	314
chr11	74213970	74219210	7	-	LOC102554403	0	0.212018	0.317793	0.263824	0.257842	10.5775	-0.598259	5240
chr11	74313756	74314136	6	-	Hes1	0	0.0463726	0.192619	0.118371	0.113863	14.6246	-0.45079	380
chr11	74316262	74316453	3	-	Hes1	-1014	0.00648008	0.103297	0.0664678	0.0743156	9.68172	0.784782	191
chr11	74316478	74316504	4	-	Hes1	-1230	0.00687962	0.103126	0.0702012	0.0620496	9.62464	-0.815162	26
chr11	74994014	75144968	11	+	Atp13a5	0	0.305869	0.356324	0.350195	0.331502	5.04546	-1.86926	150954
chr11	75434979	75435165	3	+	Mb21d2	0	0.0063977	0.105422	0.133831	0.124299	9.90241	-0.953193	186
chr11	75606136	75606891	3	+	LOC103690579	0	0.0097084	0.120121	0.0575045	0.0534019	11.0413	-0.410264	755
chr11	75905402	76429731	21	+	Fgf12	0	0.339134	0.411583	0.372047	0.372375	7.24492	0.032776	524329
chr11	76429957	76429974	3	-	LOC102549362	-2068	0.00575344	0.0906317	0.10935	0.092233	8.48782	-1.71172	17
chr11	79827557	79827623	3	-	Lpp	0	0.00295751	0.0651508	0.0470654	0.0473376	6.21933	0.0272223	66
chr11	80255661	80255690	3	+	Bcl6	33	0.0027701	0.0974207	0.0614887	0.05579	9.46506	-0.569872	29
chr11	80256341	80256356	3	+	Bcl6	0	0.00620192	0.147419	0.0906576	0.100047	14.1217	0.938926	15
chr11	80257409	80262803	3	+	Bcl6	0	0.00852654	0.104231	0.0712976	0.0518202	9.57048	-1.94774	5394
chr11	80262877	80262921	3	+	Bcl6	0	0.00807255	0.0791369	0.04823	0.0501475	7.10644	0.191748	44
chr11	81358375	81358401	3	+	Rfc4	192	0.00294995	0.0839238	0.0537028	0.0406464	8.09739	-1.30565	26
chr11	81379672	81379701	3	-	Eif4a2	-20	0.00769548	0.107489	0.0590409	0.0627248	9.97933	0.368391	29
chr11	82193679	82194583	4	+	Etv5	75	0.0450264	0.176345	0.0825255	0.0793137	13.1318	-0.32118	904
chr11	82466144	82466263	8	+	Igf2bp2	0	0.00616187	0.0748395	0.0875646	0.0690178	6.86777	-1.85468	119
chr11	83412890	83412912	3	+	LOC681827	18839	0.00523261	0.0677012	0.140056	0.218543	6.24686	7.8487	22
chr11	83866894	83867024	5	+	Clcn2	0	0.00896469	0.0954347	0.0725146	0.0642552	8.647	-0.825939	130
chr11	83963672	83964213	7	-	Ece2	0	0.0751921	0.189883	0.19305	0.196236	11.4691	0.31856	541
chr11	83964278	83974358	7	-	Ece2	0	0.0112835	0.128253	0.0693247	0.0667076	11.6969	-0.261711	10080
chr11	83975401	83975504	4	-	Ece2	0	0.00656941	0.151372	0.0359482	0.0200814	14.4802	-1.58668	103
chr11	83976803	83976933	7	-	Ece2	0	0.00664692	0.0779036	0.047967	0.0429989	7.12567	-0.49681	130
chr11	83976941	83985266	6	-	Ece2	0	0.00845989	0.105682	0.06779	0.0668408	9.72224	-0.0949131	8325
chr11	84068248	84068379	5	-	Dvl3	0	0.0481199	0.138891	0.0540714	0.0537589	9.07709	-0.0312531	131
chr11	84395875	84395944	6	-	Yeats2	0	0.00320599	0.0778364	0.0517526	0.0476912	7.46304	-0.406147	69
chr11	84778883	84930267	15	+	Klhl6	0	0.411097	0.498754	0.494418	0.492814	8.76572	-0.16039	151384
chr11	84930326	84930471	4	-	B3gnt5	0	0.103892	0.168315	0.152733	0.142009	6.44232	-1.0724	145
chr11	86555864	86555885	3	+	Tbx1	0	0.00336864	0.0833858	0.0582797	0.0381879	8.00171	-2.00918	21
chr11	86655045	86655142	3	-	Gnb1l	0	0.011259	0.154196	0.101584	0.0954585	14.2937	-0.612503	97
chr11	86655612	86655701	4	-	Gnb1l	0	0.000913242	0.0949018	0.0447359	0.0430783	9.39885	-0.165758	89
chr11	86890927	86902974	3	+	Ranbp1	0	0	0.148183	0.102293	0.111111	14.8183	0.881834	12047
chr11	86903264	86903312	3	+	Zdhhc8	0	0.0870108	0.198746	0.100417	0.107023	11.1736	0.660665	48
chr11	87016998	87017073	5	-	Rtn4r	0	0.0577043	0.128149	0.120678	0.11436	7.04442	-0.631771	75
chr11	87220578	87220646	3	+	Gsc2	0	0.0032113	0.123601	0.106899	0.119046	12.039	1.21474	68
chr11	87317183	87365111	3	+	LOC103690296	0	0.230804	0.376282	0.286481	0.321751	14.5478	3.52699	47928
chr11	87402634	87402846	3	-	Thap7	0	0.0469755	0.159862	0.11036	0.105612	11.2886	-0.474812	212
chr11	87678358	87678501	5	+	Klhl22	0	0.0134638	0.0979896	0.0944989	0.0866416	8.45258	-0.785735	143
chr11	87722253	87722415	4	+	Scarf2	0	0.00181159	0.1462	0	0	14.4388	0	162
chr11	87814787	87814870	3	-	LOC100911248	0	0.0657573	0.160018	0.129158	0.12733	9.42611	-0.182822	83
chr11	87815176	87857994	8	-	Trnas-uga	0	0.469103	0.574838	0.654396	0.661787	10.5735	0.739082	42818
chr11	88122234	88122310	5	+	Sdf2l1	0	0.00402897	0.0982215	0.0293821	0.0184676	9.41926	-1.09146	76
chr11	88424457	88510392	8	+	Spag6l	0	0.483577	0.623347	0.468764	0.518121	13.977	4.93576	85935
chr11	88649673	88649807	6	+	Fgd4	0	0.017409	0.133368	0.0651903	0.0581404	11.5959	-0.704992	134
chr11	89008728	89511168	19	+	Cebpd	0	0.317777	0.412609	0.311255	0.314187	9.4832	0.293262	502440
chr11	89557578	89992760	11	+	Ube2v2	0	0.498025	0.619883	0.414072	0.409175	12.1858	-0.489773	435182
chr12	328569	503621	107	-	Zar1l	0	0.735008	0.807608	0.716793	0.768208	7.25998	5.14147	175052
chr12	1816056	1816143	3	-	Insr	0	0.0192061	0.150854	0.0881917	0.101422	13.1648	1.32301	87
chr12	1816289	1816476	3	-	Insr	0	0.00154911	0.0997747	0.0664036	0.0532627	9.82256	-1.31409	187
chr12	2221121	2221237	6	+	Mcemp1	-4117	0.0747538	0.138638	0.117656	0.107243	6.3884	-1.04134	116
chr12	2558530	2563993	14	-	Lrrc8e	0	0.365758	0.841214	0.39829	0.820719	47.5456	42.2429	5463
chr12	6342107	6342168	3	-	Hsph1	-210	0.00122549	0.129413	0.0843987	0.067468	12.8187	-1.69307	61
chr12	7032251	7081958	13	+	LOC102551796	0	0.479289	0.535449	0.473228	0.460177	5.61592	-1.30516	49707
chr12	7623693	7630723	17	-	LOC102555153	-62886	0.256868	0.3075	0.276277	0.270771	5.06318	-0.550656	7030
chr12	8492075	8725452	15	+	Slc46a3	29	0.141928	0.237825	0.195058	0.17502	9.58966	-2.00383	233377
chr12	9010989	9033807	6	+	Flt1	192	0.0141976	0.0656009	0.072139	0.048884	5.14033	-2.32549	22818
chr12	9033883	9034057	4	+	Flt1	0	0.00884097	0.105608	0.060764	0.0597106	9.6767	-0.105341	174
chr12	9464400	9464473	5	+	Cdx2	0	0.00441222	0.0823196	0.0508073	0.0527073	7.79073	0.189995	73
chr12	9471605	9496450	28	-	Pdx1	0	0.0442512	0.107513	0.102957	0.083045	6.32616	-1.99116	24845
chr12	9496476	9496656	8	-	Pdx1	0	0.0216826	0.134478	0.111411	0.0995382	11.2796	-1.18728	180
chr12	9499760	9500218	6	-	Pdx1	0	0.00801281	0.0931916	0.0594778	0.0599879	8.51788	0.0510113	458
chr12	9500249	9500829	7	-	Pdx1	0	0.00635803	0.118664	0.0659503	0.0692824	11.2306	0.333217	580
chr12	9607074	9607179	7	-	Gsx1	0	0.00396146	0.0864747	0.0712017	0.0664388	8.25133	-0.476284	105
chr12	9608659	9609680	5	-	Gsx1	-1492	0.025832	0.0950623	0.0717666	0.0636267	6.92303	-0.813991	1021
chr12	11144771	11144846	4	-	Zfp655	0	0.0251041	0.113558	0.0783282	0.073592	8.84535	-0.473625	75
chr12	11176134	11179700	9	+	Zfp394	0	0.00479323	0.107737	0.0613611	0.0625886	10.2944	0.122753	3566
chr12	11240353	11240405	3	-	Bud31	0	0.00223548	0.111691	0.0568159	0.0641096	10.9455	0.72937	52
chr12	11240699	11265292	12	+	Pdap1	0	0.171015	0.282249	0.179441	0.181341	11.1234	0.190077	24593
chr12	11265819	11265841	3	-	Arpc1b	0	0.00502672	0.0841537	0.0369618	0.0286885	7.9127	-0.827333	22
chr12	11294004	11294089	9	-	Arpc1a	0	0.00517063	0.0792101	0.0621842	0.0440769	7.40395	-1.81073	85
chr12	11433928	11433954	3	+	Smurf1	0	0.0397433	0.1003	0.0802632	0.0754953	6.05568	-0.476786	26
chr12	12330910	12331929	3	+	LOC102554669	0	0.192479	0.281581	0.169181	0.188438	8.91017	1.92571	1019
chr12	12374719	12374826	3	+	Tecpr1	0	0.00582602	0.13649	0.0645497	0.0627279	13.0664	-0.182179	107
chr12	12855133	12855239	4	+	Usp42	0	0.067733	0.173326	0.117831	0.124254	10.5593	0.64228	106
chr12	13067215	13067250	4	-	Fam220a	-173	0.00389421	0.0878539	0.059711	0.0550835	8.39596	-0.46275	35
chr12	13157204	13157463	5	-	Daglb	0	0.00670103	0.104437	0.0887444	0.0757164	9.77358	-1.3028	259
chr12	13157506	13157565	3	-	Daglb	0	0.0311027	0.160498	0.0679181	0.0662334	12.9395	-0.168479	59
chr12	13651226	13668039	9	-	Fscn1	0	0.0790374	0.140435	0.272686	0.267958	6.13979	-0.47283	16813
chr12	13715819	13715863	4	+	Actb	0	0.00172625	0.0810799	0.0247304	0.0273692	7.93536	0.26388	44
chr12	13716868	13728745	14	+	Actb	0	0.360854	0.410904	0.302229	0.318927	5.00499	1.6698	11877
chr12	13728795	13802229	22	+	Fbxl18	0	0.491887	0.560227	0.602181	0.622771	6.83395	2.05896	73434
chr12	13802245	13802650	4	+	Tnrc18	5170	0.0156358	0.108525	0.061033	0.0671238	9.28888	0.609082	405
chr12	13803983	13804284	5	+	Tnrc18	3536	0.00454052	0.0815887	0.05173	0.0559381	7.70482	0.420817	301
chr12	13806649	13807728	3	+	Tnrc18	92	0.097944	0.249977	0.136333	0.120839	15.2033	-1.54945	1079
chr12	13808450	13808719	3	+	Tnrc18	0	0.00534116	0.104235	0.052431	0.0592331	9.88938	0.680214	269
chr12	13808756	13810125	10	+	Tnrc18	0	0.0353125	0.146256	0.0990336	0.0907771	11.0944	-0.825645	1369
chr12	13997859	13998133	5	-	Wipi2	0	0.00395143	0.111598	0.0188711	0.0220144	10.7646	0.314327	274
chr12	14003689	14021779	6	+	Mmd2	0	0.212349	0.299933	0.451862	0.430458	8.75839	-2.14034	18090
chr12	14175936	14176112	5	-	Ap5z1	0	0.00668884	0.0655225	0.035281	0.0346653	5.88336	-0.0615743	176
chr12	14176137	14176189	3	-	Ap5z1	-77	0.00234742	0.0956443	0.0644653	0.06369	9.32968	-0.077522	52
chr12	14278910	14279454	4	-	Foxk1	-34277	0.270888	0.332613	0.322403	0.347341	6.17252	2.49375	544
chr12	14279471	14279526	3	-	Foxk1	-34838	0.00316194	0.115113	0.0519598	0.0462585	11.1951	-0.570131	55
chr12	15996618	16002527	7	-	Amz1	0	0.151331	0.251031	0.189973	0.227346	9.97007	3.73736	5909
chr12	16002549	16002664	5	-	Amz1	0	0.00508517	0.156021	0.104896	0.105215	15.0936	0.0318868	115
chr12	16083936	16084171	3	+	Ttyh3	0	0.110642	0.211165	0.175604	0.163413	10.0523	-1.21908	235
chr12	16126056	16126074	3	-	Lfng	0	0.00253579	0.0911309	0.0578602	0.047236	8.85951	-1.06242	18
chr12	16126420	16126451	3	-	Lfng	-210	0.00566043	0.0858383	0.0525179	0.0453869	8.01779	-0.713101	31
chr12	16127092	16218165	31	+	Grifin	0	0.655342	0.759784	0.651464	0.705581	10.4442	5.41171	91073
chr12	16340711	16340878	5	+	Snx8	45	0.00525602	0.0980686	0.043861	0.0428605	9.28126	-0.100048	167
chr12	16410222	16410361	5	+	Mad1l1	0	0.00188242	0.114881	0.0292272	0.0263378	11.2999	-0.288933	139
chr12	16809457	16809492	4	-	Elfn1	0	0.0125941	0.0950392	0.0662725	0.0612893	8.24452	-0.498325	35
chr12	16934365	16934393	3	-	Mafk	0	0.00299931	0.110368	0.0804341	0.0617284	10.7369	-1.87057	28
chr12	16988166	16988228	3	+	Micall2	0	0.00387518	0.0968508	0.0554577	0.06	9.29756	0.454234	62
chr12	17183208	17183236	3	-	Uncx	0	0.00459824	0.0618129	0.0561883	0.0599874	5.72146	0.379912	28
chr12	17185195	17185689	4	-	Uncx	0	0.0409549	0.156482	0.125565	0.10887	11.5527	-1.66945	494
chr12	17358417	17358503	3	-	Gpr146	0	0.055092	0.134867	0.100512	0.101706	7.97754	0.119348	86
chr12	17532793	17532945	3	-	Sun1	0	0.0439299	0.144197	0.117521	0.121538	10.0267	0.401712	152
chr12	17532969	17533278	11	-	Sun1	0	0.017982	0.10479	0.0758467	0.0689128	8.68076	-0.693387	309
chr12	17732816	17733127	7	+	Pdgfa	0	0.0447012	0.130714	0.0974196	0.110076	8.60131	1.26566	311
chr12	17733885	17735468	6	+	Pdgfa	0	0.0188966	0.111478	0.073674	0.0480748	9.25816	-2.55993	1583
chr12	17735531	17735670	6	+	Pdgfa	0	0.017828	0.110909	0.0813682	0.0755313	9.30807	-0.583689	139
chr12	17738111	17738154	3	+	Pdgfa	0	0.00815132	0.0979572	0.066886	0.0846642	8.98059	1.77782	43
chr12	17972938	17973036	3	-	Fam20c	-206	0.136171	0.189681	0.0520918	0.0538057	5.35108	0.171387	98
chr12	18530963	18531022	3	-	Akap17a	0	0.00599777	0.11292	0.109402	0.100309	10.6922	-0.909341	59
chr12	19336363	19336472	3	+	Mblac1	0	0.00479237	0.0871243	0.0494017	0.0409794	8.2332	-0.84223	109
chr12	19574128	19581735	8	+	Lamtor4	0	0.580107	0.639119	0.675663	0.666687	5.90117	-0.897592	7607
chr12	19581848	19582003	4	-	RGD1305455	0	0.0234722	0.109283	0.0656858	0.0780469	8.58109	1.23611	155
chr12	21860057	22082253	27	-	RGD1561143	0	0.443994	0.502943	0.445224	0.470904	5.8949	2.56794	222196
chr12	22082278	22082358	3	+	Agfg2	0	0.00194175	0.0859855	0.0317429	0.0275756	8.40438	-0.41673	80
chr12	22230516	22250957	24	+	Gnb2	0	0.289074	0.35529	0.34052	0.336364	6.62164	-0.415572	20441
chr12	22259227	22259744	5	+	Pop7	0	0.0966827	0.193642	0.142688	0.1404	9.69595	-0.228801	517
chr12	22434877	22440201	7	+	Slc12a9	0	0.313176	0.374955	0.346184	0.343275	6.17797	-0.290966	5324
chr12	22451306	22458154	11	+	Trip6	0	0.0177073	0.0957891	0.0781463	0.0634476	7.80818	-1.46987	6848
chr12	22458345	22458412	4	+	Srrt	0	0.0252267	0.102986	0.0694029	0.0746676	7.77591	0.526472	67
chr12	22458559	22472062	3	+	Srrt	0	0.209386	0.353842	0.506246	0.529531	14.4456	2.32855	13503
chr12	22678885	22678898	3	-	Vgf	0	0.00463931	0.0704261	0.0416099	0.0344457	6.57868	-0.71642	13
chr12	22765349	22799126	3	-	LOC100910802	0	0.00662097	0.153365	0.0945424	0.0995887	14.6744	0.504627	33777
chr12	22799148	22799368	4	-	LOC100910802	0	0.00535973	0.204057	0.138238	0.104709	19.8697	-3.3529	220
chr12	23089947	23090498	8	-	Myl10	-14390	0.0198815	0.0956681	0.0512722	0.0426761	7.57866	-0.859609	551
chr12	23123938	23149326	15	+	Cux1	1562	0.661409	0.774227	0.629525	0.664893	11.2818	3.53683	25388
chr12	23151268	23151400	8	+	Cux1	0	0.00212146	0.102702	0.0636095	0.0563157	10.0581	-0.729374	132
chr12	23574149	23574311	6	+	Lrwd1	0	0.00471842	0.0992734	0.0672207	0.0674028	9.4555	0.0182026	162
chr12	23861586	23861612	4	-	Srrm3	0	0.00382102	0.0851393	0.0931235	0.0971015	8.13183	0.397797	26
chr12	24238332	24238446	5	+	Hip1	0	0.00540568	0.120241	0.0358234	0.0388481	11.4836	0.302469	114
chr12	24346734	24346886	6	-	Nsun5	0	0.0667632	0.122746	0.101595	0.0995123	5.59833	-0.208284	152
chr12	24474009	24474034	3	+	Fzd9	0	0.00650325	0.0691642	0.0296926	0.0284698	6.2661	-0.122286	25
chr12	24511522	24536235	9	-	Baz1b	0	0.213449	0.316289	0.27369	0.277676	10.284	0.398641	24713
chr12	24536244	24536315	3	-	Baz1b	0	0.0890885	0.23181	0.160072	0.165982	14.2721	0.591009	71
chr12	24536566	24536593	3	-	Baz1b	0	0.00545062	0.0985962	0.0536084	0.0447173	9.31456	-0.88911	27
chr12	24578631	24579016	6	-	Tbl2	0	0.00370818	0.108778	0.0587873	0.0622091	10.5069	0.342177	385
chr12	24618295	24618481	4	-	Mlxipl	0	0.0122308	0.137982	0.103772	0.105573	12.5752	0.180087	186
chr12	24723200	24726304	10	-	Abhd11	0	0.289605	0.357619	0.303163	0.344172	6.80137	4.10089	3104
chr12	24732761	24739832	7	-	LOC686150	4286	0.16898	0.344797	0.156095	0.296503	17.5817	14.0408	7071
chr12	24775847	24779496	4	-	Wbscr27	0	0.130696	0.297515	0.133916	0.130712	16.6819	-0.320488	3649
chr12	24825262	24905584	29	+	Wbscr28	-16976	0.721004	0.83308	0.720692	0.810716	11.2075	9.00233	80322
chr12	25263895	25264104	4	+	Gtf2ird1	0	0.00904714	0.134825	0.0915607	0.0826055	12.5778	-0.895524	209
chr12	25264126	25264262	3	+	Gtf2ird1	0	0.0252712	0.117737	0.0715727	0.0552231	9.24653	-1.63496	136
chr12	25268753	25391651	7	+	Gtf2ird1	0	0.388582	0.476186	0.3872	0.370907	8.76042	-1.62924	122898
chr12	25412436	25412629	4	+	Gtf2i	0	0.00648301	0.138915	0.159573	0.169107	13.2432	0.953471	193
chr12	28155938	28156021	4	+	LOC103693638	0	0.00374404	0.108743	0.0532442	0.0460007	10.4998	-0.724353	83
chr12	28156204	28156223	3	+	LOC103693638	0	0.00540456	0.0967331	0.0460433	0.0452044	9.13285	-0.0838863	19
chr12	29921335	29921760	3	+	Sbds	0	0.00478731	0.0788879	0.0465388	0.0499344	7.41006	0.339555	425
chr12	30004681	30004761	3	-	Rabgef1	0	0.00323487	0.109482	0.096516	0.0777073	10.6247	-1.88087	80
chr12	30272033	30303843	7	-	Nupr2	0	0.179174	0.305413	0.0396775	0.00902763	12.6239	-3.06499	31810
chr12	31323735	31323998	4	-	Ran	0	0.00425484	0.155944	0.0384637	0.0388961	15.1689	0.0432401	263
chr12	31759841	31760121	3	-	Fzd10	0	0.00320513	0.0892798	0.0509407	0.0363019	8.60747	-1.46388	280
chr12	31760364	31760415	3	-	Fzd10	0	0.0741667	0.155795	0.0602069	0.0540524	8.16281	-0.615456	51
chr12	31934231	31934346	3	+	Tmem132d	0	0.0611628	0.143785	0.0843043	0.0704299	8.26221	-1.38744	115
chr12	33129878	33130012	7	-	Tmem132c	0	0.00663904	0.0836719	0.0554908	0.0552995	7.70329	-0.0191247	134
chr12	36477144	36492734	6	-	Aacs	19660	0.0935939	0.189837	0.144938	0.154933	9.62433	0.999484	15590
chr12	36594226	36594351	5	+	Dhx37	0	0.0419599	0.128814	0.0934872	0.0897363	8.68537	-0.375088	125
chr12	37209708	37209789	5	-	LOC102556092	0	0.0275938	0.105938	0.0857566	0.0779169	7.83438	-0.783977	81
chr12	37210429	37210448	3	-	LOC102556092	0	0.00297402	0.0990399	0.0592174	0.0577474	9.60659	-0.147002	19
chr12	37210560	37210627	4	-	LOC102556092	0	0.0880344	0.191073	0.03125	0.0220672	10.3039	-0.918283	67
chr12	37479788	37479960	3	-	Tmed2	0	0.00238095	0.0824996	0.0676329	0.0419426	8.01187	-2.56902	172
chr12	37581525	37593582	3	+	Sbno1	111	0.0126659	0.167877	0.117944	0.124867	15.5211	0.692339	12057
chr12	37668636	37668663	3	+	Cdk2ap1	0	0.00366972	0.0852138	0.0796716	0.0631741	8.15441	-1.64975	27
chr12	37669269	37699782	19	+	Cdk2ap1	0	0.141041	0.221523	0.275032	0.274188	8.04814	-0.0843717	30513
chr12	37771824	37771868	4	+	Mphosph9	-5338	0.00760083	0.0756503	0.0425576	0.0533333	6.80494	1.07758	44
chr12	37923986	37924065	6	+	Abcb9	0	0.00366921	0.0863921	0.0635792	0.0616264	8.27229	-0.195272	79
chr12	38117460	38117576	4	-	Denr	0	0.054734	0.141346	0.174322	0.160059	8.66115	-1.42627	116
chr12	38117631	38117658	3	-	Denr	0	0.00535704	0.0934239	0.0655185	0.0433604	8.80668	-2.21581	27
chr12	38489990	38490029	5	+	Diablo	202	0.00654379	0.0737518	0.0620991	0.0656109	6.7208	0.351173	39
chr12	38649213	38690069	18	-	Bcl7a	0	0.274636	0.341237	0.409022	0.407199	6.66003	-0.182225	40856
chr12	38690295	38690313	3	-	Bcl7a	0	0.0408111	0.125646	0.0964286	0.0944237	8.48349	-0.200492	18
chr12	38690663	38690710	4	-	Bcl7a	0	0.0480303	0.121389	0.0916409	0.0967972	7.33583	0.515629	47
chr12	38844714	38861010	33	-	Setd1b	0	0.796554	0.912758	0.763849	0.912909	11.6205	14.906	16296
chr12	38862399	38865609	12	-	Setd1b	0	0.396451	0.626142	0.345692	0.622058	22.9692	27.6367	3210
chr12	38870828	38870925	6	+	LOC102556093	0	0.00630742	0.103205	0.0701851	0.0632918	9.68978	-0.689326	97
chr12	38870949	38873018	7	+	LOC102556093	0	0.0596649	0.140314	0.105979	0.0955892	8.06491	-1.03896	2069
chr12	39130831	39131190	4	+	Kdm2b	0	0.0554768	0.178338	0.128129	0.121438	12.2861	-0.669057	359
chr12	39253865	39254098	4	+	Camkk2	0	0.0328783	0.116441	0.0830075	0.078131	8.35624	-0.487654	233
chr12	39258057	39295444	20	+	Camkk2	0	0.462822	0.528465	0.480876	0.531434	6.56432	5.05582	37387
chr12	39667701	39667769	3	-	Arpc3	0	0.0368569	0.138005	0.110819	0.0981558	10.1148	-1.26632	68
chr12	39679369	39679925	3	+	Fam216a	0	0.0301237	0.146073	0.106562	0.0935487	11.5949	-1.30138	556
chr12	40016938	40017274	5	+	Cux2	1664	0.0509378	0.150117	0.106567	0.121688	9.91794	1.51212	336
chr12	40226999	40230382	11	-	Fam109a	0	0.142403	0.269579	0.14364	0.207495	12.7176	6.38546	3383
chr12	40244307	40244368	3	-	Fam109a	-13750	0.00240096	0.112758	0.0797319	0.0660824	11.0357	-1.36495	61
chr12	40510212	40510462	3	+	Mapkapk5	0	0.108586	0.235562	0.166431	0.187364	12.6976	2.09326	250
chr12	40619299	40619332	3	+	Erp29	46	0.0027639	0.0849457	0.121196	0.127089	8.21818	0.589309	33
chr12	40680419	40695729	3	-	LOC100360290	0	0.458632	0.636105	0.545278	0.595272	17.7473	4.99938	15310
chr12	41384031	41384139	5	+	Dtx1	0	0.0402047	0.113118	0.0820988	0.0880556	7.29129	0.595674	108
chr12	41384384	41384573	3	+	Dtx1	0	0.00607109	0.120215	0.0607227	0.0579756	11.4144	-0.274707	189
chr12	41385486	41396991	8	+	Dtx1	0	0.644365	0.601608	0.60491	0.523295	-4.27566	-8.16154	11505
chr12	41399767	41404660	10	+	Dtx1	0	0.181277	0.265842	0.208037	0.238359	8.45653	3.03221	4893
chr12	41507292	41507902	4	-	Iqcd	0	0.0340496	0.166375	0.110021	0.0981869	13.2326	-1.18337	610
chr12	41599930	41600058	5	+	Plbd2	0	0.105038	0.216637	0.103301	0.101138	11.1598	-0.216307	128
chr12	41665489	41665738	3	-	Lhx5	0	0.0109129	0.126606	0.0463771	0.0492661	11.5693	0.288901	249
chr12	41667382	41667959	7	-	Lhx5	0	0.00204351	0.0645261	0.04863	0.0363635	6.24826	-1.22666	577
chr12	41675296	41675324	3	+	LOC102549553	0	0.00708242	0.0793713	0.0382309	0.0282861	7.22889	-0.994478	28
chr12	42059864	42060793	5	+	Tbx5	0	0.0415617	0.12973	0.10568	0.0796144	8.81678	-2.60657	929
chr12	42067445	42067544	7	+	Tbx5	0	0.00600495	0.0821408	0.0499665	0.0469048	7.61359	-0.306166	99
chr12	42477922	42478278	8	-	Tbx3	1241	0.00939741	0.116693	0.072116	0.0722135	10.7295	0.00974769	356
chr12	42483251	42483732	21	-	Tbx3	0	0.435633	0.640973	0.497707	0.631368	20.534	13.3661	481
chr12	42493053	42493139	3	-	Tbx3	0	0.00508138	0.114722	0.0658965	0.0635521	10.9641	-0.234436	86
chr12	43707527	43722033	20	+	LOC102553129	31339	0.146603	0.21799	0.184472	0.173167	7.13865	-1.13049	14506
chr12	43888235	43888412	4	-	RGD1562310	32153	0.00857491	0.0588608	0.0462918	0.0483884	5.02858	0.20966	177
chr12	44029121	44029406	4	-	Hrk	0	0.098724	0.204792	0.091333	0.0933218	10.6068	0.198874	285
chr12	44173284	44173529	4	-	Tesc	0	0.00571806	0.109874	0.0303832	0.0383667	10.4156	0.798346	245
chr12	44174075	44174101	3	-	Tesc	0	0.00916513	0.102946	0.0677827	0.0647686	9.37806	-0.301412	26
chr12	44174148	44174220	6	-	Tesc	0	0.00509775	0.0773417	0.0574737	0.0517687	7.22439	-0.570502	72
chr12	44174590	44174619	3	-	Tesc	0	0.00650367	0.0715459	0.029743	0.0405662	6.50422	1.08232	29
chr12	44912353	44912401	3	-	LOC102553753	0	0	0.0901728	0.0630406	0.0493537	9.01728	-1.36869	48
chr12	44963032	44963088	5	-	Wsb2	-354	0.00434691	0.0932612	0.0544283	0.0574109	8.89143	0.298255	56
chr12	44963206	44963278	4	-	Wsb2	-528	0.0018856	0.101033	0.0633965	0.0601948	9.9147	-0.320164	72
chr12	46615764	46615846	4	+	Bicdl1	0	0.0532259	0.121306	0.102642	0.0872185	6.80805	-1.54237	82
chr12	46717950	46718004	3	-	Rab35	0	0.00612036	0.0844849	0.0535874	0.0442032	7.83646	-0.938426	54
chr12	46718012	46718181	3	-	Rab35	0	0.00653486	0.107283	0.0540082	0.0651464	10.0748	1.11382	169
chr12	46718205	46718281	4	-	Rab35	0	0.00177054	0.098435	0.0659849	0.0554552	9.66644	-1.05297	76
chr12	46718365	46718486	5	-	Rab35	0	0.0369427	0.120074	0.105834	0.0976174	8.31314	-0.821682	121
chr12	46789690	46789885	7	-	Gcn1l1	0	0.0284427	0.101258	0.09647	0.0859571	7.28151	-1.05129	195
chr12	46844927	46845001	4	-	Pxn	0	0.0739855	0.141042	0.110946	0.12162	6.70562	1.0674	74
chr12	46957044	46972406	9	+	LOC102547958	-1596	0.35312	0.405628	0.390875	0.37965	5.25079	-1.12248	15362
chr12	47185413	47185605	3	+	Cabp1	0	0.00681461	0.127314	0.333333	0.275362	12.05	-5.7971	192
chr12	47218474	47218812	5	-	LOC102548245	0	0.00270189	0.12921	0.0729265	0.0736477	12.6508	0.0721215	338
chr12	47219589	47234259	6	+	Mlec	0	0.364442	0.457855	0.322771	0.324275	9.34128	0.150413	14670
chr12	47239942	47240026	6	+	Unc119b	0	0.0294535	0.0952121	0.0642344	0.0602037	6.57586	-0.403073	84
chr12	47407893	47408507	3	+	Hnf1a	0	0.153323	0.398976	0.0378722	0.106567	24.5653	6.86948	614
chr12	47552072	47552331	5	+	RGD1560398	0	0.03806	0.1431	0.0755538	0.0791698	10.504	0.361597	259
chr12	47587867	47588072	5	-	Ankrd13a	0	0.00670558	0.129271	0.0970166	0.0980593	12.2565	0.104267	205
chr12	47588471	47588751	6	-	Ankrd13a	0	0.000595238	0.107652	0.0592437	0.0605448	10.7057	0.130104	280
chr12	47667633	47667679	4	+	Gltp	0	0.00725119	0.119583	0.0804336	0.0837209	11.2332	0.328733	46
chr12	47682726	47689894	19	+	Gltp	0	0.656045	0.857318	0.66974	0.84862	20.1273	17.888	7168
chr12	47698864	47699017	3	+	Trpv4	0	0.045246	0.16728	0.136663	0.127678	12.2033	-0.898537	153
chr12	47793312	47793373	3	-	Fam222a	0	0.00302701	0.126452	0.079175	0.0706051	12.3425	-0.856992	61
chr12	47920444	47920535	3	-	Mvk	0	0.00302452	0.119709	0.0797092	0.0625625	11.6685	-1.71467	91
chr12	48101105	48101148	4	+	Foxn4	0	0.00845296	0.144843	0.0969758	0.0758469	13.639	-2.11289	43
chr12	48101210	48101473	5	+	Foxn4	0	0.00255777	0.0913001	0.0675721	0.065408	8.87423	-0.216408	263
chr12	48628501	48628704	4	+	Sart3	0	0.0535543	0.15842	0.111662	0.0941495	10.4865	-1.75128	203
chr12	48628724	48628824	5	+	Sart3	0	0.0790749	0.15043	0.147584	0.154866	7.13554	0.728244	100
chr12	49081355	49148881	13	+	LOC102551333	-7976	0.528063	0.580784	0.772247	0.781079	5.27215	0.883223	67526
chr12	50090512	50090777	7	+	Sez6l	0	0.0110858	0.118576	0.0946274	0.0829945	10.7491	-1.16329	265
chr12	50383500	50383523	3	-	Tpst2	0	0.00692321	0.103934	0.0764331	0.0639205	9.70103	-1.25127	23
chr12	50448558	50521833	26	+	Miat	0	0.338637	0.449107	0.393918	0.416672	11.047	2.27542	73275
chr12	51251003	51251082	4	-	Mn1	-774	0.0302392	0.132188	0.0981068	0.0884533	10.1949	-0.965357	79
chr12	51251421	51251471	3	-	Mn1	-1192	0.00862361	0.0888747	0.060169	0.0545163	8.02511	-0.565266	50
chr12	51341576	51341691	5	-	Pitpnb	0	0.0258767	0.119613	0.0862989	0.0760305	9.3736	-1.02685	115
chr12	51702730	51824228	3	-	Ttc28	0	0.683283	0.742482	0.724423	0.719858	5.91989	-0.456474	121498
chr12	51948188	51948226	4	+	Ep400	424	0.00150376	0.0638153	0.093834	0.0876289	6.23116	-0.620515	38
chr12	51948754	51948800	3	+	Ep400	0	0.00652173	0.139186	0.100263	0.0945693	13.2665	-0.569354	46
chr12	52072199	52072261	3	+	Noc4l	0	0.0723823	0.142981	0.0863023	0.0900574	7.05988	0.375512	62
chr12	52238525	52289405	14	+	Fbrsl1	244	0.28649	0.353586	0.363591	0.375626	6.70961	1.2035	50880
chr12	52290470	52306007	13	+	Fbrsl1	0	0.726834	0.792125	0.766319	0.769229	6.52909	0.291011	15537
chr12	52452043	52452351	4	-	Pole	0	0.0772403	0.188799	0.0864079	0.0754518	11.1559	-1.09561	308
chr12	52452421	52467429	7	+	Pxmp2	0	0.115019	0.180539	0.220521	0.218181	6.55206	-0.233978	15008
chr13	25262091	25262168	3	-	Rnf152	0	0.00663331	0.125654	0.0747956	0.0772106	11.9021	0.241501	77
chr13	26172946	26173048	3	+	Phlpp1	0	0.00355065	0.159088	0.0829155	0.0664763	15.5537	-1.64392	102
chr13	26173197	26173243	4	+	Phlpp1	0	0.00167504	0.0646931	0.0413022	0.0402788	6.30181	-0.102334	46
chr13	26173297	26173447	5	+	Phlpp1	0	0.0039814	0.0752124	0.0393493	0.0321421	7.1231	-0.72072	150
chr13	26812137	26812242	4	-	Kdsr	0	0.00267238	0.121966	0.0784027	0.0873632	11.9294	0.896045	105
chr13	31081738	31412942	4	+	Cdh7	0	0.727064	0.608201	0.206637	0.206189	-11.8863	-0.0447785	331204
chr13	34365177	34365398	4	+	Clasp1	0	0.0173462	0.132839	0.099999	0.0950131	11.5493	-0.498597	221
chr13	35048138	35048650	6	-	Gli2	-51130	0.055006	0.143652	0.110856	0.116646	8.86456	0.579027	512
chr13	35441968	35442045	4	-	Inhbb	0	0.00252051	0.126149	0.064248	0.0540851	12.3629	-1.01629	77
chr13	35531169	35531443	3	-	Ralb	0	0.000869565	0.139985	0.0765367	0.0656297	13.9116	-1.0907	274
chr13	36378426	36378589	4	+	C1ql2	0	0.0185941	0.129859	0.0904007	0.091077	11.1265	0.0676215	163
chr13	36529676	36530513	7	+	En1	2246	0.0109494	0.106128	0.0803587	0.0737357	9.5179	-0.662299	837
chr13	44345525	44347689	4	-	Tmem163	0	0.0177482	0.131213	0.0823942	0.0654016	11.3465	-1.69927	2164
chr13	44957275	44957325	3	+	Ubxn4	0	0.0812922	0.155754	0.151257	0.156883	7.44616	0.562588	50
chr13	46027156	46027220	3	+	Thsd7b	73842	0.00627136	0.0812728	0.0463052	0.0399927	7.50014	-0.631245	64
chr13	47441216	47441362	4	+	Yod1	0	0.0213575	0.102745	0.069481	0.0768855	8.13874	0.740456	146
chr13	48022193	48022263	4	-	Rassf5	0	0.00533308	0.124948	0.076796	0.0754246	11.9615	-0.137138	70
chr13	48285119	48285214	5	-	Srgap2	0	0.00755264	0.105824	0.00711538	0.0103281	9.82716	0.321276	95
chr13	48661035	48714620	9	-	LOC100363803	0	0.749354	0.804422	0.878255	0.896821	5.50683	1.85669	53585
chr13	48790838	48791002	4	+	Elk4	0	0.00535245	0.0842553	0.0459391	0.0493925	7.89029	0.345335	164
chr13	49074959	49075091	4	+	Klhdc8a	0	0.00296636	0.0841439	0.0486047	0.0544183	8.11775	0.581365	132
chr13	49075101	49075217	6	+	Klhdc8a	0	0.0279834	0.144574	0.104611	0.0996304	11.659	-0.49803	116
chr13	49092365	49092402	4	+	Nuak2	0	0.00655639	0.0614371	0.0717822	0.0631475	5.48807	-0.863464	37
chr13	49092504	49151285	49	+	Nuak2	0	0.759858	0.842352	0.766406	0.858818	8.24934	9.24116	58781
chr13	49169442	49169846	3	-	Tmcc2	0	0.00539673	0.128699	0.0508576	0.0342293	12.3302	-1.66284	404
chr13	49169943	49170109	3	-	Tmcc2	0	0.157442	0.261445	0.175348	0.17815	10.4002	0.280182	166
chr13	49170199	49170220	3	-	Tmcc2	-100	0.00409699	0.0975193	0.117662	0.0871369	9.34223	-3.0525	21
chr13	49522417	49522456	3	-	Nfasc	0	0.00203252	0.073517	0.0495317	0.0343673	7.14845	-1.51645	39
chr13	49660541	49660599	3	+	Lrrn2	0	0.00599569	0.12312	0.0590182	0.0544352	11.7124	-0.458296	58
chr13	49764596	49828733	3	+	LOC102549273	0	0.17862	0.271021	0.300142	0.282178	9.24018	-1.79639	64137
chr13	49933413	49933718	3	+	Ppp1r15b	0	0.00246987	0.122404	0.0373124	0.041576	11.9934	0.426361	305
chr13	50196241	50196486	3	+	Zbed6	0	0.00809385	0.180453	0.10859	0.0899634	17.2359	-1.86266	245
chr13	50372454	50384970	10	+	LOC103692077	0	0.673004	0.759512	0.754124	0.802277	8.65077	4.8153	12516
chr13	50434657	50434921	4	+	Sox13	0	0.00376889	0.14356	0.0781909	0.0993916	13.9791	2.12007	264
chr13	50435496	50436026	6	+	Sox13	0	0.07862	0.209833	0.116209	0.118312	13.1213	0.210261	530
chr13	50440178	50440485	5	+	Sox13	0	0.0608329	0.151874	0.147161	0.144689	9.10409	-0.247163	307
chr13	50916632	50916758	8	-	Btg2	0	0.00297342	0.101764	0.0915415	0.0844172	9.87909	-0.712429	126
chr13	50917162	50917241	5	-	Btg2	-219	0.00573237	0.158789	0.0886244	0.0718614	15.3056	-1.6763	79
chr13	51230329	51232180	8	+	Cyb5r1	0	0.248432	0.321363	0.286346	0.278872	7.29311	-0.747385	1851
chr13	51281051	51317343	5	+	Klhl12	0	0.00205468	0.124257	0.0756691	0.0730085	12.2202	-0.266059	36292
chr13	51336987	51337097	6	-	LOC685511	-3987	0.00810878	0.0874958	0.0693105	0.0599562	7.93871	-0.935433	110
chr13	51384658	51384718	3	+	Kdm5b	0	0.0413688	0.14497	0.103939	0.103507	10.3601	-0.0432768	60
chr13	51385644	51385715	4	+	Kdm5b	0	0.00684605	0.116018	0.0735701	0.0660947	10.9172	-0.74754	71
chr13	51469766	51469792	3	+	Kdm5b	-14375	0.0062291	0.100552	0.104495	0.106097	9.43232	0.160191	26
chr13	51790800	51790824	4	+	Ube2t	54	0.00612486	0.0852305	0.0614433	0.0463215	7.91056	-1.51218	24
chr13	52196944	52196985	3	-	Shisa4	0	0.00546842	0.0946712	0.0509677	0.0628613	8.92028	1.18936	41
chr13	52589167	52589472	6	+	Phlda3	0	0.00531625	0.125576	0.0581813	0.0514415	12.026	-0.673975	305
chr13	52645069	52645101	5	+	Lad1	157	0.00487966	0.0688673	0.0458459	0.0413091	6.39876	-0.453675	32
chr13	56015560	56015656	3	+	Dennd1b	0	0.00459207	0.0885125	0.14702	0.141935	8.39204	-0.50843	96
chr13	56513635	56546137	9	+	Zbtb41	0	0.0140154	0.143038	0.0991569	0.0832155	12.9023	-1.59414	32502
chr13	60568242	60568448	8	+	Uchl5	0	0.00377627	0.110036	0.0784028	0.0726899	10.626	-0.571286	206
chr13	60568464	60568703	5	+	LOC102549528	0	0.00441465	0.0989701	0.0573584	0.0568126	9.45554	-0.0545745	239
chr13	68360385	68360546	4	-	Hmcn1	0	0.00431851	0.150048	0.0912848	0.0854707	14.573	-0.581406	161
chr13	70019400	70019529	8	-	Rgl1	0	0.0443261	0.143244	0.110824	0.105397	9.8918	-0.542753	129
chr13	70321399	70321962	6	-	Smg7	0	0.00418913	0.120195	0.0923431	0.0909668	11.6006	-0.137623	563
chr13	71331144	71331205	4	+	Glul	0	0.00564523	0.0921517	0.0487843	0.0493529	8.65065	0.0568575	61
chr13	72743710	72743775	3	-	Ier5	0	0.0014881	0.0907697	0.0566659	0.0590843	8.92816	0.241848	65
chr13	74024434	74024479	3	-	Axdnd1	-272	0.0457793	0.135934	0.100189	0.0936893	9.01547	-0.649939	45
chr13	74276782	74276825	3	-	Tor3a	0	0.00325197	0.112188	0.116233	0.109524	10.8936	-0.670888	43
chr13	74333161	74333196	4	-	Fam20b	0	0.00199007	0.0863192	0.057411	0.050628	8.43292	-0.678295	35
chr13	75059735	75059873	6	+	LOC680254	317	0.0310339	0.102138	0.0797189	0.0669226	7.11037	-1.27963	138
chr13	77958956	77959001	3	-	Cacybp	0	0.0045083	0.0727463	0.0458638	0.042735	6.8238	-0.312872	45
chr13	82231033	82231118	4	+	Scyl3	0	0.00366138	0.150584	0.130343	0.116287	14.6923	-1.40567	85
chr13	82231418	82298185	5	+	Scyl3	0	0.266549	0.374902	0.352179	0.346367	10.8353	-0.581209	66767
chr13	82552698	82574912	9	+	Slc19a2	0	0.264684	0.329878	0.294904	0.292956	6.51934	-0.194811	22214
chr13	82575000	82607354	4	+	Ccdc181	0	0.0829842	0.207536	0.177455	0.154713	12.4552	-2.27413	32354
chr13	83679841	83679992	4	-	Dcaf6	0	0.0400414	0.126683	0.0603385	0.0588044	8.66416	-0.153406	151
chr13	83848687	83848714	3	-	Trnap-cgg	-149	0.00691359	0.103509	0.0635117	0.0577151	9.65952	-0.579663	27
chr13	85443733	85443841	4	+	LOC102548111	0	0.00456811	0.120129	0.0494993	0.0449792	11.5561	-0.452009	108
chr13	85917457	85917476	3	+	LOC103693681	0	0.0046729	0.144679	0.103693	0.0783999	14.0006	-2.52932	19
chr13	86671539	86671670	5	-	Pbx1	-80	0.00498876	0.122114	0.0770007	0.074674	11.7125	-0.232673	131
chr13	88294759	88307895	8	-	Hsd17b7	0	0.647377	0.709537	0.590235	0.587411	6.21597	-0.282431	13136
chr13	88943828	88943974	3	-	Nos1ap	0	0.110538	0.193034	0.176522	0.151283	8.24957	-2.52382	146
chr13	89449284	89449698	16	-	Trnag-ucc	-67	0.0395712	0.124973	0.0804571	0.0784443	8.54021	-0.201278	414
chr13	89644355	89660804	20	+	B4galt3	0	0.540349	0.65386	0.550521	0.628067	11.3511	7.7546	16449
chr13	89661002	89667990	6	-	Usp21	0	0.0113921	0.109552	0.168698	0.220217	9.81603	5.15194	6988
chr13	89756227	89765968	5	+	Nectin4	0	0.347111	0.401602	0.528017	0.578192	5.44902	5.01759	9741
chr13	90405458	90405532	5	-	Vangl2	0	0.0708047	0.151417	0.122281	0.111535	8.06124	-1.0746	74
chr13	90405569	90405680	4	-	Vangl2	0	0.00101626	0.148587	0.0889131	0.0893313	14.757	0.0418185	111
chr13	90439715	90467065	11	-	Nhlh1	0	0.422238	0.472825	0.456071	0.452382	5.05867	-0.368879	27350
chr13	90759171	90759326	3	+	Pigm	0	0.151651	0.31488	0.22644	0.223604	16.3228	-0.283613	155
chr13	91895645	91928066	8	+	Aim2	0	0.224974	0.28331	0.280319	0.251691	5.83359	-2.8628	32421
chr13	93395756	93535433	3	-	Rgs7	0	0.594709	0.664315	0.62248	0.631476	6.96053	0.899586	139677
chr13	93677166	93677214	3	-	Fh	0	0	0.118371	0.0754573	0.0673077	11.8371	-0.814962	48
chr13	95581186	95581249	3	+	Zfp238	988	0.00308121	0.0774561	0.04926	0.0370655	7.43748	-1.21945	63
chr13	95942817	95943267	4	-	Adss	0	0.13141	0.209132	0.159847	0.17122	7.77215	1.13727	450
chr13	96237379	96238074	4	-	Hnrnpu	0	0.0702599	0.183197	0.201869	0.183126	11.2937	-1.87434	695
chr13	96303858	96304316	6	+	Efcab2	0	0.00476658	0.107757	0.0480809	0.0363514	10.2991	-1.17296	458
chr13	97173696	97174032	5	-	Kif26b	-228	0.0110493	0.153431	0.0673348	0.0666135	14.2381	-0.0721237	336
chr13	98773130	98773172	3	-	Stum	0	0.00405103	0.108691	0.08552	0.0710016	10.464	-1.45184	42
chr13	99184561	99184692	4	+	Pycr2	0	0.00149567	0.12621	0.0894845	0.0752022	12.4715	-1.42823	131
chr13	99533977	99534727	3	-	LOC103693699	0	0.00254605	0.0840841	0.0637198	0.0479486	8.1538	-1.57712	750
chr13	100129634	100129665	3	+	Eif3el1	51	0.0042573	0.0953411	0.051868	0.0507937	9.10838	-0.10743	31
chr13	100817373	100817413	3	+	Tp53bp2	0	0.0688976	0.184438	0.152201	0.133803	11.554	-1.83986	40
chr13	100928489	100928529	4	-	Capn2	0	0.00369108	0.0948518	0.0595995	0.0547577	9.11607	-0.48418	40
chr13	101769985	101770082	4	-	Mia3	0	0.0298109	0.148743	0.149711	0.157741	11.8932	0.80303	97
chr13	101789254	101789353	5	+	Taf1a	0	0.0258311	0.102749	0.086024	0.0693719	7.69182	-1.66521	99
chr13	102631235	102642630	6	-	Hlx	0	0.096756	0.195371	0.157936	0.148808	9.86146	-0.912856	11395
chr13	102758684	102790391	20	+	LOC103692371	0	0.405104	0.45953	0.40193	0.428143	5.4426	2.62122	31707
chr13	102790592	102790637	4	-	RGD1310587	0	0.0455049	0.132557	0.0932614	0.101121	8.7052	0.785997	45
chr13	103660134	103660175	3	+	LOC103692374	-13858	0.0103506	0.0790488	0.0556728	0.0496157	6.86982	-0.605713	41
chr13	104080645	104080674	5	-	Lyplal1	0	0.00568142	0.0883375	0.0476115	0.0553518	8.26561	0.774025	29
chr13	104283594	104283695	3	-	LOC100912365	0	0.00395815	0.0888515	0.0596968	0.0478162	8.48934	-1.18806	101
chr13	105141221	105141383	3	-	Tgfb2	0	0.00539568	0.076087	0.0488591	0.0387972	7.06913	-1.00619	162
chr13	106066582	106110732	5	+	Esrrg	10871	0.36997	0.445133	0.420526	0.39364	7.51637	-2.68862	44150
chr13	106463505	106463673	4	+	Esrrg	0	0.00445132	0.108368	0.0513374	0.0472976	10.3917	-0.403988	168
chr13	108377302	108377460	3	+	Prox1	5077	0.00305482	0.11784	0.0766303	0.0708939	11.4785	-0.573637	158
chr13	108382731	108383840	9	+	Prox1	0	0.0212682	0.107876	0.0807422	0.0787335	8.66074	-0.200863	1109
chr13	108642025	108642053	4	+	Smyd2	104	0.00147493	0.110276	0.082032	0.0698833	10.8801	-1.21488	28
chr13	108642075	108642244	3	+	Smyd2	0	0.00729827	0.167698	0.123469	0.0975908	16.0399	-2.58785	169
chr13	108642411	108642452	5	+	Smyd2	0	0.00313593	0.0663257	0.0383117	0.0304199	6.31898	-0.789178	41
chr13	108841787	108841824	4	-	LOC103693701	0	0.00713143	0.10766	0.0669463	0.0643348	10.0529	-0.261149	37
chr13	109629215	109629282	5	-	Flvcr1	0	0.00557289	0.0963363	0.0695844	0.0692899	9.07634	-0.0294489	67
chr13	109669457	109669577	4	-	Tatdn3	0	0.00351446	0.088395	0.0569531	0.05096	8.48806	-0.599305	120
chr13	110077984	110078016	4	-	Ppp2r5a	-39	0.00310559	0.0685324	0.0489557	0.0313924	6.54268	-1.75633	32
chr13	110677996	110678077	3	+	Slc30a1	0	0.00296454	0.112149	0.0817836	0.0670781	10.9185	-1.47055	81
chr13	111488148	111504821	6	-	Hhat	0	0.0304684	0.162748	0.117612	0.081064	13.228	-3.65477	16673
chr13	113373699	113373867	5	+	Plxna2	0	0.0281918	0.141194	0.142099	0.138739	11.3003	-0.336006	168
chr13	113374503	113374663	5	+	Plxna2	0	0.0460291	0.141922	0.11177	0.101349	9.58929	-1.04215	160
chr14	1469429	1469507	3	+	Ppp2r3b	242	0.0130368	0.0746762	0.187192	0.184834	6.16394	-0.2358	78
chr14	1469720	1469796	3	+	Ppp2r3b	0	0.00115942	0.0881096	0.0581615	0.0637453	8.69502	0.558383	76
chr14	1470072	1470198	8	+	Ppp2r3b	0	0.0474328	0.141345	0.0792306	0.0764308	9.39118	-0.279981	126
chr14	2032860	2032895	3	-	Fgfrl1	-692	0.00602826	0.0944763	0.0498669	0.0489102	8.8448	-0.0956658	35
chr14	2069644	2069732	3	+	Dgkq	0	0.0667176	0.200274	0.149084	0.141334	13.3556	-0.774985	88
chr14	2194960	2195054	4	+	Cplx1	0	0.00584521	0.125215	0.0819687	0.0888297	11.937	0.686103	94
chr14	2296995	2297044	6	-	Pcgf3	0	0.00635866	0.0665871	0.0514555	0.0367777	6.02285	-1.46778	49
chr14	2389747	2390073	7	-	LOC102556249	0	0.00493404	0.0937204	0.0564991	0.0581522	8.87864	0.165313	326
chr14	2613466	2613560	3	+	Tmed5	0	0.00167945	0.0996445	0.0528099	0.0644158	9.7965	1.16059	94
chr14	2700993	2701105	6	-	Mtf2	0	0.00270797	0.0761939	0.0498485	0.0418013	7.34859	-0.804719	112
chr14	3058475	3059580	8	+	Gfi1	0	0.00644563	0.0871516	0.0597012	0.0570451	8.07059	-0.265618	1105
chr14	3059919	3059938	3	+	Gfi1	0	0.0119394	0.112508	0.0675689	0.0602093	10.0569	-0.735966	19
chr14	3060667	3060849	6	+	Gfi1	0	0.00512945	0.123322	0.0704631	0.0689095	11.8193	-0.155366	182
chr14	4251659	4251680	3	+	LOC102551276	0	0.0054382	0.0805403	0.0426587	0.0471817	7.51021	0.452297	21
chr14	4350699	4350796	5	+	Barhl2	11922	0.00815024	0.105736	0.0738078	0.0574068	9.75856	-1.6401	97
chr14	4351452	4351736	4	+	Barhl2	10982	0.00662902	0.112207	0.0848378	0.0735625	10.5578	-1.12753	284
chr14	4352982	4357592	5	+	Barhl2	5126	0.0122805	0.113603	0.0841077	0.0605931	10.1323	-2.35147	4610
chr14	4358628	4358772	4	+	Barhl2	3946	0.0601007	0.207001	0.166139	0.148279	14.6901	-1.786	144
chr14	4367338	4368550	5	+	Barhl2	0	0.0031093	0.10131	0.0363759	0.0299987	9.82003	-0.637717	1212
chr14	4978676	4978918	4	-	Zfp326	19613	0.146464	0.239609	0.216095	0.223321	9.31444	0.722601	242
chr14	5195181	5195330	3	-	Lrrc8d	-28491	0.189959	0.299198	0.268141	0.256145	10.9238	-1.19964	149
chr14	5480828	5480987	4	-	LOC102548248	0	0.02167	0.163351	0.11481	0.0899532	14.1681	-2.48572	159
chr14	6645211	6645361	10	-	Pkd2	0	0.0400338	0.120317	0.0515043	0.0392832	8.02831	-1.2221	150
chr14	7863861	7863930	3	-	Ptpn13	-183	0.00178571	0.110373	0.0630719	0.0760401	10.8587	1.29682	69
chr14	7911945	7937363	13	+	Ndufb4l1	11880	0.474603	0.526144	0.480288	0.48643	5.15418	0.61418	25418
chr14	9140888	9141876	3	+	Wdfy3	0	0.00395662	0.119532	0.0854075	0.0663768	11.5576	-1.90308	988
chr14	9456320	9456695	5	-	Cds1	0	0.00623819	0.11309	0.0674126	0.064378	10.6852	-0.303459	375
chr14	9552458	9554843	7	+	Nkx6-1	422	0.0156054	0.106233	0.0473354	0.04439	9.06272	-0.294539	2385
chr14	9555777	9555814	3	+	Nkx6-1	0	0.00193798	0.114959	0.0690811	0.0844594	11.3021	1.53783	37
chr14	9556235	9556284	3	+	Nkx6-1	0	0.00383418	0.124891	0.0785236	0.0687934	12.1056	-0.973014	49
chr14	10424884	10446960	14	+	Fam175a	0	0.100565	0.18793	0.147031	0.146831	8.7366	-0.0199471	22076
chr14	10446970	10447029	3	+	Helq	0	0.00164474	0.087611	0.0480586	0.0366292	8.59662	-1.14294	59
chr14	10447174	10447224	3	+	Helq	0	0.00375349	0.0835975	0.0541985	0.053082	7.9844	-0.111651	50
chr14	10581265	10581413	3	+	Coq2	0	0.0100846	0.119703	0.0288533	0.0412853	10.9619	1.2432	148
chr14	10770126	10770158	4	+	Lin54	0	0.00426682	0.0768421	0.0438932	0.0492951	7.25753	0.540197	32
chr14	10772158	10772189	3	+	Lin54	0	0.00324675	0.0945062	0.048105	0.0586735	9.12595	1.05685	31
chr14	10841759	10842016	13	+	LOC100911553	0	0.00330343	0.0959458	0.0577297	0.0578608	9.26424	0.0131195	257
chr14	11321843	11321888	3	-	LOC102557303	0	0.00611369	0.0957632	0.0802998	0.0570569	8.96495	-2.32429	45
chr14	11496315	11499938	7	+	LOC103692593	125019	0.193586	0.262093	0.299028	0.300237	6.85073	0.120911	3623
chr14	12370427	12386302	6	-	Bmp3	0	0.287625	0.392613	0.241863	0.225683	10.4988	-1.61804	15875
chr14	12386824	12386879	3	-	Bmp3	0	0.00596296	0.0845475	0.0547479	0.0450211	7.85845	-0.97268	55
chr14	12995871	12995975	4	-	Fgf5	-54	0.00451128	0.0923798	0.0589714	0.0505556	8.78685	-0.841587	104
chr14	13055506	13055535	3	-	Prdm8	0	0.00411734	0.0926719	0.0775012	0.0469061	8.85546	-3.05951	29
chr14	13056013	13056072	5	-	Prdm8	0	0.0229781	0.125107	0.0897116	0.088389	10.2129	-0.132251	59
chr14	13059893	13060746	14	-	Prdm8	0	0.00847844	0.101924	0.0820649	0.0672141	9.34459	-1.48507	853
chr14	13072378	13072449	5	-	Prdm8	-11761	0.0102151	0.108082	0.130142	0.127422	9.78669	-0.272009	71
chr14	16275833	16275967	4	-	Ccng2	0	0.00385885	0.113117	0.0464657	0.0614433	10.9259	1.49776	134
chr14	16365079	16368645	4	+	Ccni	-754	0.909006	0.744199	0.97416	0.975758	-16.4807	0.159737	3566
chr14	16453364	16453606	4	-	LOC103692656	34932	0.00514592	0.098253	0.0642057	0.0603694	9.3107	-0.383624	242
chr14	16453645	16490858	5	-	LOC103692656	0	0.252961	0.374595	0.178361	0.185566	12.1634	0.720427	37213
chr14	17247495	17247693	6	+	Sdad1	0	0.00768478	0.0730882	0.0935075	0.0712671	6.54034	-2.22403	198
chr14	17283106	17283304	4	+	Naaa	0	0.00730064	0.112157	0.0985857	0.0918897	10.4857	-0.669599	198
chr14	18079531	18265636	6	+	Btc	0	0.295436	0.385796	0.30489	0.292558	9.036	-1.23319	186105
chr14	19494776	19672248	8	+	Cox18	-48398	0.697927	0.689358	0.579269	0.527809	-0.856902	-5.14597	177472
chr14	21155728	21155783	4	-	Utp3	-77	0	0.0993113	0.0478873	0.0619883	9.93113	1.4101	55
chr14	29225236	29225477	5	-	Adgrl3	-368818	0.00840564	0.107605	0.080077	0.0726079	9.91996	-0.746918	241
chr14	34528081	34528127	3	-	Tmem165	0	0.00300478	0.0977724	0.0734166	0.0623924	9.47676	-1.10242	46
chr14	34528368	34570115	6	-	Srd5a3	0	0.2201	0.342799	0.334709	0.326007	12.2699	-0.870262	41747
chr14	34570176	34570424	7	-	Srd5a3	0	0.00619673	0.0969286	0.0523422	0.04962	9.07319	-0.272222	248
chr14	35576738	35576936	8	-	Pdgfra	0	0.0404569	0.130842	0.102284	0.0982414	9.03852	-0.404238	198
chr14	36208006	36208112	3	-	Fip1l1	0	0.0328794	0.205431	0.149239	0.14255	17.2551	-0.66892	106
chr14	36686943	36686963	3	+	Usp46	172	0.00316295	0.134152	0.00203252	0.00161812	13.0989	-0.0414397	20
chr14	37284540	37284773	7	-	Dcun1d4	0	0.00312347	0.0651495	0.0342932	0.0342803	6.2026	-0.00128685	233
chr14	37433187	37475141	8	+	Ociad2	0	0.292818	0.362563	0.331944	0.323595	6.97451	-0.834847	41954
chr14	37763676	37763748	5	-	Zar1	0	0.0720973	0.133652	0.0800978	0.076745	6.15547	-0.335289	72
chr14	37871119	37871269	3	-	Slain2	0	0.00162189	0.0925183	0.0845441	0.0740922	9.08964	-1.0452	150
chr14	42402200	42402255	5	+	Bend4	0	0.00482704	0.084068	0.0461516	0.0508355	7.9241	0.468388	55
chr14	42559090	42559191	3	-	Tmem33	0	0.00273529	0.155542	0.0917082	0.0888823	15.2807	-0.282591	101
chr14	42559277	42559350	4	-	Tmem33	0	0.00304422	0.0981347	0.0647923	0.0676875	9.50905	0.289519	73
chr14	42585720	42585809	5	-	Tmem33	-26141	0.00588748	0.0748891	0.0547473	0.0435533	6.90016	-1.11941	89
chr14	43072724	43072750	3	-	Limch1	0	0.046733	0.111132	0.199312	0.197438	6.43988	-0.187492	26
chr14	43072824	43072854	3	-	Limch1	0	0.00777972	0.139109	0.0866237	0.0806863	13.1329	-0.59374	30
chr14	43872431	43879200	4	-	Chrna9	4251	0.0299155	0.0972489	0.0739043	0.0792072	6.73334	0.530295	6769
chr14	44185203	44185264	3	+	Pds5a	182	0.188834	0.270351	0.195909	0.18274	8.15166	-1.31688	61
chr14	44348167	44348681	6	-	Ube2k	0	0.047241	0.133546	0.0766768	0.0597958	8.63054	-1.6881	514
chr14	44413159	44413470	3	+	Smim14	167	0.00400409	0.0937268	0.0556255	0.0584164	8.97227	0.279087	311
chr14	45174636	45174820	4	-	Klf3	-884	0.00226308	0.119213	0.0643219	0.0577022	11.695	-0.661974	184
chr14	45863768	45863824	4	-	Pgm2	0	0.00827016	0.067612	0.0439111	0.0397967	5.93418	-0.411435	56
chr14	46134574	46134710	3	-	LOC498368	0	0.000990099	0.121982	0.0781548	0.0479174	12.0992	-3.02374	136
chr14	59735662	59736129	4	-	Rbpj	0	0.0032353	0.0895515	0.0603044	0.0637694	8.63162	0.346502	467
chr14	59736219	59736606	3	-	Rbpj	-61	0.00204082	0.133382	0.0444363	0.0347358	13.1342	-0.970051	387
chr14	60122500	60122734	4	+	Sel1l3	251	0.0398705	0.130812	0.106452	0.0890726	9.09413	-1.73796	234
chr14	61212373	61212397	4	+	Dhx15	-37494	0.00592331	0.0858455	0.0552642	0.0481766	7.99222	-0.708756	24
chr14	61213302	61213603	3	+	Dhx15	-38423	0.0450677	0.129324	0.0927835	0.0725389	8.42562	-2.02446	301
chr14	62645981	62646025	4	-	Gnpda2	0	0.00365766	0.0778316	0.0511002	0.0545648	7.41739	0.346458	44
chr14	70218381	70655736	10	+	LOC102551743	0	0.289822	0.356048	0.305378	0.274535	6.62259	-3.08438	437355
chr14	71416769	71416802	3	+	Tapt1	0	0.0084596	0.115429	0.0746699	0.0609931	10.697	-1.36768	33
chr14	73738127	73809917	6	+	Bod1l1	0	0.23335	0.291405	0.0878541	0.0633291	5.80547	-2.4525	71790
chr14	73813099	73813152	4	+	Nkx3-2	380	0.00839488	0.131661	0.0994942	0.0861301	12.3266	-1.33642	53
chr14	73889139	73889297	5	+	Rab28	0	0.0383833	0.166229	0.105535	0.0910961	12.7845	-1.44391	158
chr14	75851806	75851899	7	+	LOC103693084	0	0.00525935	0.0870788	0.0609877	0.0504289	8.18194	-1.05588	93
chr14	76856798	76856874	7	+	Zfp518b	9445	0.00125786	0.0782531	0.0525096	0.0549482	7.69952	0.243852	76
chr14	76990303	76990486	5	+	Wdr1	0	0.00302269	0.0865743	0.0511929	0.0633516	8.35517	1.21588	183
chr14	78308892	78309014	4	-	Crmp1	0	0.00272723	0.20474	0.127018	0.135918	20.2013	0.890038	122
chr14	78310428	78312331	10	-	Crmp1	0	0.0104329	0.0697455	0.0406116	0.0361416	5.93126	-0.447006	1903
chr14	78522340	78522445	3	-	Jakmip1	-52861	0.00117371	0.138676	0.09674	0.0984115	13.7502	0.167146	105
chr14	78522761	78523076	4	-	Jakmip1	-53282	0.00142942	0.12399	0.0786895	0.0822614	12.256	0.357195	315
chr14	78523169	78523263	3	-	Jakmip1	-53690	0.0947725	0.227831	0.16648	0.158811	13.3059	-0.766846	94
chr14	78640183	78640373	5	+	Wfs1	335	0.0312841	0.10933	0.069311	0.070247	7.80462	0.0936049	190
chr14	78902070	78902334	12	-	LOC103693768	0	0.0170117	0.0928866	0.0336125	0.0298936	7.58749	-0.371886	264
chr14	78902407	78902449	3	-	LOC103693768	-62	0.00271461	0.0682015	0.0428891	0.0374818	6.54869	-0.540733	42
chr14	79445035	79445370	7	-	Ccdc96	0	0.00467425	0.0801914	0.0592756	0.0481617	7.55172	-1.11139	335
chr14	79538905	79538962	3	+	Sorcs2	0	0.0076281	0.0976444	0.0622963	0.0735242	9.00163	1.12278	57
chr14	80355419	80355526	5	-	Acox3	0	0.00255645	0.0636099	0.0788489	0.0701406	6.10535	-0.870828	107
chr14	80544356	80544407	3	-	Hmx1	0	0.00403321	0.0841905	0.0471325	0.0456094	8.01573	-0.152315	51
chr14	80544713	80544872	4	-	Hmx1	-101	0.213019	0.30986	0.115189	0.108517	9.68411	-0.667174	159
chr14	81069371	81069893	4	-	Rgs12	0	0.00419267	0.176671	0.0785021	0.0682692	17.2478	-1.02329	522
chr14	81254796	81339363	3	-	Grk4	0	0.00251281	0.191184	0.123288	0.119098	18.8672	-0.419001	84567
chr14	81339572	81339585	3	-	Grk4	-57	0.00216223	0.0737705	0.0627155	0.0393656	7.16083	-2.33499	13
chr14	81426214	81426282	4	-	Add1	0	0.0015846	0.109172	0.0716197	0.0627244	10.7587	-0.889537	68
chr14	81426857	81448154	12	-	Sh3bp2	0	0.0701931	0.150064	0.204504	0.193739	7.98707	-1.07648	21297
chr14	81819047	81819109	6	+	Mxd4	99	0.0231003	0.104583	0.0737123	0.0663033	8.14824	-0.740895	62
chr14	81837881	81837950	3	+	Poln	0	0.0865385	0.190103	0.186179	0.200983	10.3565	1.48039	69
chr14	82048423	82048738	4	-	Nat8l	-173	0.0043641	0.12221	0.0698274	0.0900395	11.7846	2.02121	315
chr14	82196212	82196241	3	-	Whsc1	0	0.00493827	0.0902687	0.0609867	0.042626	8.53304	-1.83607	29
chr14	82287038	82287148	7	-	Fgfr3	0	0.0049386	0.0883413	0.0434193	0.0482553	8.34027	0.483599	110
chr14	82287174	82287524	5	-	Fgfr3	0	0.0489817	0.148974	0.0958644	0.0859004	9.99925	-0.996401	350
chr14	82375258	82375290	3	+	Fam53a	0	0.00446429	0.0762433	0.0385076	0.0307836	7.1779	-0.7724	32
chr14	82375354	82375613	8	+	Fam53a	0	0.0417746	0.148817	0.103595	0.103587	10.7042	-0.000802958	259
chr14	82602539	82602688	3	+	Nkx1-1	851	0.00268425	0.0898468	0.0678419	0.0477674	8.71626	-2.00745	149
chr14	82602951	82603301	3	+	Nkx1-1	238	0.104552	0.244491	0.185344	0.166631	13.9939	-1.87129	350
chr14	82603845	82603893	3	+	Nkx1-1	0	0.00172188	0.0985762	0.0666579	0.0536069	9.68544	-1.30511	48
chr14	82606555	82606830	3	+	Nkx1-1	0	0.0103718	0.140968	0.00426136	0.00120192	13.0597	-0.305944	275
chr14	82697053	82697133	4	-	Maea	0	0.00823733	0.112157	0.0756041	0.0779196	10.3919	0.231552	80
chr14	82697647	82697698	3	-	Maea	0	0.0997501	0.158551	0.0573853	0.0625378	5.88007	0.515253	51
chr14	82762333	82762673	3	+	Ctbp1	0	0.0655931	0.184381	0.0886978	0.11138	11.8788	2.2682	340
chr14	83061890	83062064	4	-	Ywhah	0	0.00912015	0.0971444	0.0639837	0.0633376	8.80243	-0.0646158	174
chr14	83412515	83412558	3	+	Eif4enif1	329	0.0016715	0.105274	0.0416656	0.040146	10.3602	-0.151959	43
chr14	83412841	83412859	3	+	Eif4enif1	28	0.00664321	0.125	0.0885167	0.0812011	11.8357	-0.731566	18
chr14	83510536	83511796	9	+	Patz1	0	0.161187	0.220615	0.195805	0.184029	5.94289	-1.17755	1260
chr14	83512066	83561673	15	+	Patz1	0	0.401029	0.495857	0.443524	0.41583	9.4828	-2.76936	49607
chr14	83561680	83561740	5	+	Pik3ip1	0	0.00463855	0.0725714	0.0446619	0.045021	6.79329	0.0359051	60
chr14	83685173	83690472	8	-	Rnf185	0	0.28182	0.33634	0.293191	0.31173	5.45204	1.85388	5299
chr14	83773417	83773468	3	-	Smtn	0	0.0609281	0.130118	0.105616	0.0873817	6.91898	-1.82343	51
chr14	83776944	83777164	3	-	Smtn	-73	0.00269985	0.162983	0.101305	0.101688	16.0284	0.0382139	220
chr14	83887557	83887802	5	+	Morc2	1339	0.0285899	0.141179	0.099597	0.0771112	11.259	-2.24858	245
chr14	84015113	84015135	3	-	Osbp2	0	0.00211864	0.0923781	0.0591872	0.0423588	9.02594	-1.68284	22
chr14	84015145	84015185	3	-	Osbp2	0	0.00847132	0.0942037	0.0594507	0.0600331	8.57324	0.0582409	40
chr14	84335389	84335467	4	-	Sec14l2	128	0.00903835	0.0761818	0.0299315	0.0329625	6.71435	0.3031	78
chr14	84496913	84497041	6	+	Lif	0	0.00693334	0.134702	0.0794797	0.0617604	12.7768	-1.77192	128
chr14	84820014	84820130	3	-	Mtmr3	0	0.0423025	0.149227	0.106881	0.105761	10.6924	-0.111966	116
chr14	84977721	84977739	3	-	Cabp7	0	0.00805211	0.0886325	0.0921037	0.106719	8.05804	1.46156	18
chr14	85088480	85088528	5	-	Nf2	0	0.0069389	0.0629951	0.0312952	0.0246653	5.60562	-0.662992	48
chr14	85191358	85191406	3	-	Nefh	0	0.00273041	0.12567	0.102273	0.138702	12.294	3.64297	48
chr14	85312277	85314607	15	+	Rasl10a	0	0.0212156	0.114515	0.0855267	0.0757047	9.32998	-0.982199	2330
chr14	85314961	85316034	3	-	Gas2l1	0	0.127115	0.308644	0.201453	0.200243	18.1529	-0.120967	1073
chr14	85400237	85400332	3	-	Emid1	0	0.0478537	0.147622	0.126078	0.118308	9.97688	-0.776979	95
chr14	85676940	85677587	3	+	LOC102549967	53477	0.0050889	0.14346	0	0.00294118	13.8371	0.294118	647
chr14	85753450	85753580	5	+	Xbp1	157	0.00245128	0.103959	0.0580313	0.0551729	10.1507	-0.285839	130
chr14	85754196	85772336	4	+	Xbp1	0	0.00363741	0.0870949	0.0580312	0.0533079	8.34575	-0.472327	18140
chr14	85772720	85815427	9	-	Ccdc117	0	0.0221958	0.122627	0.0780637	0.0582489	10.0431	-1.98148	42707
chr14	85951786	85951811	3	-	Mrps24	0	0.00143885	0.0761687	0.0318531	0.0270537	7.47299	-0.479936	25
chr14	85982873	86001957	11	-	Urgcp	0	0.167845	0.230231	0.20235	0.193962	6.23857	-0.838776	19084
chr14	86001962	86029396	4	-	Urgcp	0	0.269603	0.335879	0.0976824	0.0952994	6.62758	-0.2383	27434
chr14	86078620	86100811	3	-	Polm	0	0.509912	0.605176	0.560791	0.545328	9.52637	-1.54628	22191
chr14	86297444	86297589	3	-	Camk2b	0	0.00532275	0.0772967	0.0448976	0.0339806	7.19739	-1.09171	145
chr14	86395168	86414890	10	-	Npc1l1	0	0.0788828	0.166647	0.192189	0.188046	8.77643	-0.414277	19722
chr14	86674154	86706234	3	+	Ppia	0	0.0084304	0.10094	0.161745	0.174069	9.25092	1.2324	32080
chr14	86706307	86706344	3	-	H2afv	0	0.00308642	0.107929	0.0576404	0.0523837	10.4842	-0.525666	37
chr14	86706392	86706440	3	-	H2afv	0	0.015722	0.158634	0.0789639	0.0552664	14.2912	-2.36975	48
chr14	88868230	88904316	27	-	Tns3	0	0.718052	0.81321	0.790729	0.881882	9.51581	9.11535	36086
chr14	88906028	88907086	10	-	LOC103693172	0	0.264449	0.060021	0.316652	0.0745919	-20.4428	-24.2061	1058
chr14	89314892	89337375	16	+	Upp1	0	0.516441	0.637193	0.626771	0.840646	12.0752	21.3875	22483
chr14	91202522	91203112	4	+	Vwc2	0	0.00746702	0.106611	0.0212561	0.024398	9.91438	0.31419	590
chr14	91203424	91203569	3	+	Vwc2	0	0.041964	0.147869	0.0856142	0.0671696	10.5905	-1.84446	145
chr14	91783387	91783451	4	+	Ikzf1	0	0.0670946	0.128397	0.148017	0.141144	6.13019	-0.687327	64
chr14	99813715	99863676	3	-	Sec61g	-32752	0.539037	0.607069	0.511246	0.600404	6.80315	8.91589	49961
chr14	99919811	99919954	4	+	Egfr	0	0.00365223	0.093248	0.0743002	0.0610527	8.95958	-1.32474	143
chr14	100323068	100323382	7	+	Ppp3r1	0	0.0955926	0.205661	0.129091	0.123451	11.0069	-0.56402	314
chr14	103173180	103176658	10	-	Meis1	5521	0.0528311	0.154782	0.123608	0.110289	10.195	-1.33193	3478
chr14	103322315	103322415	3	-	Meis1	0	0.00693232	0.120652	0.0508823	0.0756529	11.3719	2.47705	100
chr14	104186800	104186837	3	+	LOC103693205	-48521	0.0008	0.0871359	0.0438961	0.0400925	8.63359	-0.380361	37
chr14	104186960	104190758	3	+	LOC103693205	-48681	0.0289019	0.128265	0.0950932	0.0938266	9.93626	-0.126654	3798
chr14	104786454	104786827	5	+	Sertad2	0	0.00228469	0.136239	0.083999	0.0662991	13.3954	-1.76999	373
chr14	104975309	104975394	3	-	Aftph	0	0.0399435	0.135473	0.0765486	0.0653913	9.5529	-1.11573	85
chr14	104975463	104975659	3	-	Aftph	0	0.0662976	0.1963	0.0830792	0.0873873	13.0003	0.430802	196
chr14	104976112	104976202	5	-	Aftph	-352	0.00431469	0.0891386	0.0541091	0.0459016	8.48239	-0.820746	90
chr14	105054795	105054897	5	-	Lgalsl	0	0.00664785	0.131461	0.0971648	0.0796063	12.4814	-1.75585	102
chr14	106248746	106248933	7	-	Ugp2	0	0.0618737	0.122656	0.082399	0.0776033	6.07819	-0.479571	187
chr14	106866662	106867221	5	-	Otx1	-1730	0.0137428	0.0862602	0.044694	0.0503272	7.25174	0.563323	559
chr14	107303207	107303226	3	+	Tmem17	0	0.00480769	0.0779033	0.0478276	0.0457324	7.30956	-0.209518	19
chr14	107339289	107354764	6	+	LOC690096	0	0.59649	0.769753	0.895624	0.908139	17.3263	1.25143	15475
chr14	107767436	107767504	5	+	Cct4	0	0.00380493	0.0671379	0.0414964	0.0426739	6.3333	0.117751	68
chr14	107767641	107767679	4	+	Cct4	0	0.00523606	0.0807681	0.0636444	0.0431462	7.55321	-2.04982	38
chr14	108274162	108274220	4	-	Ahsa2	-174	0.0606762	0.138156	0.119146	0.107493	7.748	-1.16533	58
chr14	108411830	108411899	3	-	Pex13	0	0.00587336	0.112938	0.0826697	0.0576923	10.7064	-2.49774	69
chr14	108827819	108828648	4	+	Bcl11a	0	0.0279128	0.108023	0.179772	0.203212	8.01105	2.34402	829
chr14	108829640	108829840	3	+	Bcl11a	0	0.00714505	0.111698	0.0605867	0.0666664	10.4553	0.607971	200
chr14	110306077	110306092	3	-	LOC100361648	64356	0.00716536	0.127558	0.106047	0.0801048	12.0392	-2.59425	15
chr14	110306154	110306171	3	-	LOC100361648	64277	0.00762589	0.117415	0.0878027	0.0781931	10.9789	-0.960965	17
chr14	112946300	112946459	8	-	LOC103690141	-20	0.0055125	0.0611105	0.025573	0.0229098	5.5598	-0.266317	159
chr14	112946483	112947422	3	-	LOC103690141	-203	0.0344428	0.112367	0.0660816	0.0390133	7.79239	-2.70683	939
chr14	113530495	113530715	9	+	Pnpt1	0	0.00520801	0.101534	0.0714406	0.0657957	9.63262	-0.564493	220
chr14	113644772	113644821	3	-	Cfap36	0	0.00555593	0.0836673	0.039155	0.0422092	7.81114	0.305421	49
chr14	113644845	113770807	3	-	Cfap36	0	0.00418106	0.104519	0.0814179	0.0731264	10.0338	-0.829153	125962
chr14	113771464	113771541	3	+	Ccdc88a	0	0.0775856	0.187224	0.135248	0.116924	10.9638	-1.83242	77
chr14	114617971	114618157	4	-	Sptbn1	0	0.00866798	0.107794	0.0700384	0.0679001	9.91257	-0.213823	186
chr14	114665940	114699846	7	-	Sptbn1	0	0.163272	0.292579	0.265229	0.240684	12.9307	-2.45454	33906
chr14	115166646	115166705	5	+	Psme4	0	0.00244167	0.0793471	0.0521308	0.0570516	7.69055	0.492073	59
chr14	115166739	115166848	4	+	Psme4	0	0.00244118	0.0913914	0.0579618	0.0518892	8.89502	-0.607259	109
chr14	115352377	115352641	3	-	Erlec1	0	0.00288152	0.134809	0.0639062	0.0588009	13.1928	-0.510533	264
chr15	2368499	2371082	8	+	Zfp503	3501	0.059365	0.143479	0.116719	0.107406	8.41143	-0.931248	2583
chr15	2376314	2376349	3	+	Zfp503	0	0.00334325	0.1095	0.0839397	0.0507663	10.6157	-3.31734	35
chr15	2632821	2648347	5	+	Comtd1	0	0.00468213	0.107451	0.118242	0.114243	10.2769	-0.399873	15526
chr15	2982100	2982513	6	+	LOC102553460	0	0.00519691	0.0924254	0.0507781	0.0497684	8.72285	-0.100969	413
chr15	3410220	3410332	3	-	Adk	0	0.00613282	0.0711989	0.0446279	0.0251799	6.50661	-1.94481	112
chr15	4034867	4057031	8	-	Fut11	0	0.393517	0.476953	0.411882	0.408639	8.34351	-0.324258	22164
chr15	4092686	4254578	15	+	Usp54	0	0.509491	0.568499	0.474824	0.477305	5.9008	0.248161	161892
chr15	4356543	4356577	3	+	Dnajc9	0	0.00688207	0.106582	0.105049	0.0802072	9.96995	-2.48417	34
chr15	4454964	4482234	16	+	Kcnk16	0	0.47361	0.536601	0.506449	0.504739	6.29915	-0.171025	27270
chr15	4530793	4554416	10	-	LOC102554674	0	0.501045	0.569163	0.536036	0.562735	6.81177	2.66983	23623
chr15	4554893	4555553	3	+	Kcnk5	0	0.00808326	0.151764	0.0851069	0.0797894	14.3681	-0.531744	660
chr15	4658183	4658230	4	+	Saysd1	0	0.00258074	0.0730239	0.0454477	0.0339147	7.04432	-1.15329	47
chr15	8188940	8189001	4	+	Rpl15	0	0.00423274	0.116842	0.0611356	0.0597244	11.2609	-0.141117	61
chr15	9239323	9239779	10	-	Thrb	0	0.00442862	0.0888649	0.0461456	0.0430136	8.44363	-0.313205	456
chr15	9239785	9239831	3	-	Thrb	0	0.00629204	0.124931	0.0934698	0.0787644	11.8639	-1.47054	46
chr15	10320047	10320234	6	-	Top2b	-307	0.00439737	0.0690785	0.0477303	0.0414647	6.46812	-0.626561	187
chr15	11223365	11224441	6	+	Lrrc3b	0	0.0435339	0.174665	0.125471	0.122597	13.1131	-0.287344	1076
chr15	11912588	11912613	3	-	Slc4a7	0	0.0572698	0.21384	0.157176	0.134296	15.657	-2.28795	25
chr15	11919809	12407448	15	+	LOC100362082	0	0.536643	0.587293	0.485066	0.501594	5.06502	1.6528	487639
chr15	12570417	12570488	4	+	Thoc7	0	0.00189308	0.109367	0.0596763	0.0490324	10.7474	-1.06439	71
chr15	12827608	12828346	9	+	Fezf2	0	0.00505034	0.081732	0.0491757	0.0463985	7.66817	-0.277717	738
chr15	13634131	13634378	6	-	Ptprg	-293	0.0802172	0.164923	0.0803577	0.0771897	8.47057	-0.316795	247
chr15	13634963	13636007	4	-	Ptprg	-1125	0.00939694	0.12718	0.0497472	0.04977	11.7783	0.00227754	1044
chr15	15275441	15275478	4	+	Cadps	12	0.00622174	0.10151	0.0689662	0.0523061	9.52879	-1.66601	37
chr15	18391523	18391739	6	+	Fam107a	7995	0.0305075	0.108485	0.0803161	0.0721714	7.79771	-0.814476	216
chr15	19191629	19232150	3	+	Ptgdr	0	0.26676	0.363023	0.403366	0.376282	9.62628	-2.70844	40521
chr15	19655160	19655597	4	-	Ero1a	0	0.0791534	0.220188	0.1019	0.094683	14.1034	-0.72172	437
chr15	19667628	19667711	5	+	Psmc6	0	0.00254208	0.0881157	0.0537862	0.0432306	8.55737	-1.05556	83
chr15	19876039	19876101	6	-	Fermt2	0	0.00463346	0.0777381	0.0545031	0.0505071	7.31046	-0.3996	62
chr15	20032145	20032174	4	-	Ddhd1	0	0.00265784	0.0830518	0.0556767	0.0548611	8.0394	-0.0815513	29
chr15	20773069	20778376	18	-	Bmp4	0	0.231615	0.28303	0.29345	0.305807	5.14157	1.23566	5307
chr15	23580338	23580415	5	-	Cnih1	0	0.0448343	0.126706	0.131442	0.123648	8.18717	-0.779404	77
chr15	23968428	23968781	5	-	Gch1	0	0.0531804	0.189642	0.0923677	0.0954284	13.6462	0.306074	353
chr15	24055908	24055952	3	-	Wdhd1	0	0.00319149	0.130822	0.0986209	0.080434	12.763	-1.81869	44
chr15	24055977	24056047	3	-	Wdhd1	0	0.00329612	0.141604	0.131209	0.0902435	13.8307	-4.09653	70
chr15	24454475	24466509	4	+	Ktn1	0	0.0935888	0.247175	0.19765	0.177963	15.3586	-1.96875	12034
chr15	24467065	24467118	3	+	Ktn1	0	0.0430652	0.134477	0.0931951	0.0831127	9.14117	-1.00824	53
chr15	25294646	25294752	7	+	Tmem260	0	0.00373636	0.114042	0.0750023	0.0782297	11.0306	0.322737	106
chr15	26034115	26034414	5	+	Naa30	0	0.0757198	0.172414	0.104571	0.106913	9.6694	0.23419	299
chr15	28297320	28313377	8	+	Slc39a2	0	0.560617	0.61281	0.546523	0.539822	5.2193	-0.670181	16057
chr15	28378037	28378197	6	+	Arhgef40	0	0.0681541	0.181135	0.119261	0.106652	11.2981	-1.26097	160
chr15	28416380	28419618	5	-	Zfp219	0	0.0382988	0.191174	0.134779	0.126575	15.2875	-0.820338	3238
chr15	28748004	28748267	3	-	Sall2	-1963	0.0432472	0.169672	0.0689776	0.0668941	12.6425	-0.208348	263
chr15	33069637	33069752	5	+	Mrpl52	0	0.121971	0.213115	0.181602	0.18599	9.11444	0.43886	115
chr15	33108663	33108719	4	+	Lrp10	0	0.00577151	0.161961	0.0938063	0.104049	15.619	1.02432	56
chr15	33193422	33193499	4	-	Haus4	0	0.0305482	0.120097	0.0974547	0.103728	8.95489	0.627348	77
chr15	33250672	33263400	3	-	RGD1565222	0	0.213277	0.337711	0.134051	0.117547	12.4434	-1.65047	12728
chr15	33263460	33263495	3	-	Psmb5	0	0.00206931	0.08354	0.0518029	0.0552316	8.14707	0.342879	35
chr15	33263527	33263588	3	-	Psmb5	0	0.00368948	0.139988	0.0857093	0.0741317	13.6298	-1.15776	61
chr15	33428287	33428625	3	-	Slc7a8	0	0.00668007	0.106525	0.0609127	0.0457231	9.98452	-1.51896	338
chr15	33536293	33536321	3	-	Ppp1r3e	0	0.00243902	0.0738812	0.0281573	0.0249026	7.14422	-0.32547	28
chr15	33576110	33576147	4	-	Slc22a17	0	0.00361998	0.115705	0.0658767	0.0730502	11.2085	0.71735	37
chr15	34167827	34168029	3	+	Carmil3	0	0.00464463	0.0987829	0.0552486	0.0631515	9.41382	0.79029	202
chr15	34234772	34256148	15	+	Dcaf11	0	0.0237198	0.0895655	0.0839687	0.0714492	6.58457	-1.25195	21376
chr15	34447032	34447182	3	+	Ltb4r2	0	0.00545422	0.0594155	0.0229508	0.024012	5.39613	0.106121	150
chr15	34491561	34491653	3	+	Nfatc4	1511	0.00422515	0.140584	0.114943	0.127811	13.6359	1.2868	92
chr15	36551994	36565611	14	+	Atp12a	0	0.0575292	0.1638	0.136837	0.113579	10.6271	-2.32577	13617
chr15	36809522	36809605	5	+	Parp4	0	0.00570362	0.0987918	0.0421599	0.0320391	9.30882	-1.01207	83
chr15	37061324	37061495	6	-	Zmym5	0	0.0308413	0.131838	0.0775564	0.0711105	10.0997	-0.644587	171
chr15	37156151	37156276	7	+	Zmym2	30	0.0253694	0.0798802	0.0829424	0.0821608	5.45108	-0.0781609	125
chr15	37325001	37325073	4	-	Gja3	0	0.00500906	0.127058	0.0756322	0.0801847	12.2049	0.455247	72
chr15	37994656	37994776	4	-	Lats2	0	0.00204918	0.126592	0.0424459	0.0427673	12.4543	0.032139	120
chr15	38344383	38344930	6	+	Fgf9	0	0.00586803	0.0953711	0.055698	0.0640184	8.95031	0.83204	547
chr15	38345057	38345144	5	+	Fgf9	0	0.00409221	0.0985303	0.0560136	0.0485216	9.44381	-0.749203	87
chr15	39622613	39622652	3	+	Rcbtb1	0	0.0014881	0.0807473	0.0660975	0.0618507	7.92592	-0.424681	39
chr15	39744895	39744967	3	+	Cab39l	158	0.0800511	0.168315	0.149198	0.141997	8.82642	-0.720093	72
chr15	40665322	40665443	3	+	Amer2	0	0.00527064	0.0976946	0.0515351	0.0633047	9.24239	1.17696	121
chr15	41769638	41769669	4	-	Kpna3	0	0.00219948	0.0737866	0.0358839	0.041055	7.15871	0.517118	31
chr15	41890738	41927243	6	+	Trim13	0	0.679737	0.771484	0.602852	0.603552	9.17471	0.0700303	36505
chr15	41982142	41982222	3	-	LOC103693867	-13	0.00292561	0.121629	0.0981606	0.0846907	11.8704	-1.34699	80
chr15	42018746	42019133	3	+	LOC102547503	-9065	0.0039915	0.13262	0.0862777	0.0765878	12.8629	-0.96899	387
chr15	42489532	42518843	4	+	Pbk	0	0.370388	0.467243	0.280193	0.273196	9.68556	-0.699736	29311
chr15	42947593	42960215	9	-	Ptk2b	0	0.0292658	0.120273	0.0899663	0.0718503	9.10075	-1.8116	12622
chr15	43541769	43541982	7	-	Dpysl2	0	0.0114954	0.0796283	0.0465445	0.0439826	6.81329	-0.256188	213
chr15	43543299	43580935	4	-	Dpysl2	0	0.326327	0.449677	0.336345	0.334653	12.335	-0.169261	37636
chr15	43581900	43582225	6	+	Pnma2	0	0.00226641	0.10912	0.0694794	0.0691948	10.6853	-0.028464	325
chr15	43667303	43667332	3	-	Bnip3l	-275	0.00572264	0.0855202	0.0538894	0.0560836	7.97975	0.219427	29
chr15	43733202	43733294	3	+	LOC102555410	0	0.00568486	0.151489	0.104565	0.0883151	14.5804	-1.62503	92
chr15	43907541	43912397	19	+	Ebf2	0	0.279677	0.364018	0.246026	0.239453	8.43417	-0.657291	4856
chr15	44627955	44628032	4	-	Dock5	-180	0.00476763	0.09336	0.0614634	0.0566672	8.85923	-0.479626	77
chr15	45927669	45927700	3	-	Ints6	0	0.00208333	0.214641	0.240223	0.251572	21.2558	1.13489	31
chr15	46428457	46428489	4	-	Gata4	0	0.00966787	0.0672793	0.0441546	0.0374139	5.76114	-0.674063	32
chr15	46428515	46432728	16	-	Gata4	0	0.0320451	0.0932313	0.100722	0.0913239	6.11863	-0.939819	4213
chr15	46432780	46432869	3	-	Gata4	0	0.00367927	0.132522	0.090531	0.0949467	12.8843	0.441563	89
chr15	46442977	46453762	12	+	LOC102548615	-5995	0.236054	0.291642	0.371081	0.375283	5.55886	0.420188	10785
chr15	46726056	46784764	6	+	Xkr6	200	0.190425	0.31964	0.337722	0.326218	12.9216	-1.15034	58708
chr15	47294027	47294056	4	+	Sox7	0	0.0114568	0.0857479	0.0680369	0.0585857	7.42911	-0.94512	29
chr15	48669828	48669914	4	-	Fzd3	0	0.000677507	0.112178	0.063767	0.0623104	11.1501	-0.145661	86
chr15	51037448	51037618	9	+	Nkx2-6	0	0.00572221	0.0791649	0.053928	0.0492491	7.34427	-0.467884	170
chr15	51167652	51168079	8	-	Slc25a37	0	0.009061	0.152612	0.101702	0.0863157	14.3551	-1.53862	427
chr15	51223017	51223148	6	+	Entpd4	0	0.0884164	0.178141	0.132904	0.129713	8.97242	-0.319067	131
chr15	51400703	51401499	3	+	LOC103693694	0	0.0391406	0.153728	0.118076	0.104537	11.4588	-1.35391	796
chr15	51757951	51757965	3	+	Egr3	0	0.00393701	0.0940105	0.0580228	0.0672425	9.00735	0.921972	14
chr15	51758020	51758072	3	+	Egr3	0	0.200305	0.256656	0.247154	0.224154	5.63517	-2.29991	52
chr15	51758677	51759045	11	+	Egr3	0	0.0109684	0.114906	0.0753317	0.0653247	10.3938	-1.00069	368
chr15	51780221	51833589	13	-	Ccar2	0	0.522046	0.58827	0.578842	0.584159	6.62242	0.531613	53368
chr15	51884642	51884854	6	-	Sorbs3	0	0.00633978	0.10084	0.0725852	0.0655579	9.44999	-0.702721	212
chr15	52029532	52029643	3	-	Slc39a14	0	0.0700857	0.137941	0.112826	0.111135	6.7855	-0.169195	111
chr15	52210421	52210552	3	-	Bmp1	0	0.0790654	0.241341	0.160873	0.177016	16.2276	1.61431	131
chr15	52288585	52288713	8	-	Fam160b2	0	0.00413338	0.0683445	0.0563639	0.0551779	6.42111	-0.118604	128
chr15	52288721	52288828	3	-	Fam160b2	0	0.00380005	0.0788073	0.0521573	0.0421502	7.50073	-1.00071	107
chr15	52288853	52288935	4	-	Fam160b2	0	0.00507107	0.0934022	0.0630605	0.0546667	8.83311	-0.839381	82
chr15	52308875	52332393	20	-	Dmtn	0	0.177225	0.259342	0.230504	0.232988	8.21166	0.248394	23518
chr15	52351633	52351698	5	-	Npm2	-5788	0.00495785	0.0833364	0.0608928	0.0423247	7.83785	-1.85681	65
chr15	52351713	52442581	10	-	Xpo7	0	0.211187	0.329971	0.306112	0.299168	11.8784	-0.69437	90868
chr15	55423844	55461628	5	-	Nudt15	0	0.0041252	0.142727	0.0957889	0.0872201	13.8602	-0.856883	37784
chr15	57892116	57892209	5	+	Tpt1	0	0.00596252	0.0898166	0.0484572	0.0493666	8.38541	0.0909438	93
chr15	58170851	58170916	5	-	Gpalpp1	0	0.00445676	0.0918773	0.0511423	0.047785	8.74206	-0.335721	65
chr15	58171347	58171703	4	+	Nufip1	0	0.00631422	0.0856089	0.0555918	0.0396203	7.92946	-1.59714	356
chr15	58654856	58654927	6	+	Tsc22d1	0	0.00719487	0.106807	0.083729	0.0698014	9.96117	-1.39276	71
chr15	60056466	60056511	4	-	Dnajc15	0	0.00635662	0.0736854	0.0516842	0.0477757	6.73288	-0.39085	45
chr15	60967415	60967467	3	-	Dgkh	-6921	0.0738096	0.183389	0.178032	0.155394	10.9579	-2.26382	52
chr15	61069484	61069530	4	+	Vwa8	0	0.0479792	0.15389	0.123684	0.110853	10.5911	-1.28306	46
chr15	61872788	61872916	5	-	LOC100360244	0	0.00430629	0.0721172	0.0442558	0.0452332	6.78109	0.0977431	128
chr15	62199143	62199234	3	-	Pcdh8	0	0.0377521	0.105169	0.314607	0.336245	6.74173	2.16378	91
chr15	62200084	62200415	4	-	Pcdh8	0	0.00723125	0.0903836	0.0686522	0.0683544	8.31524	-0.029776	331
chr15	62200518	62200899	7	-	Pcdh8	0	0.00410157	0.0835847	0.0442745	0.0462875	7.94831	0.201297	381
chr15	63664279	63949613	7	+	LOC692015	0	0.343414	0.41983	0.254621	0.219809	7.64161	-3.48124	285334
chr15	67556275	67558616	3	+	Pcdh17	0	0.0155488	0.221602	0.103166	0.0871451	20.6054	-1.60208	2341
chr15	77103586	77548641	3	-	Pcdh9	0	0.108474	0.194996	0.518594	0.484175	8.65222	-3.44192	445055
chr15	77738976	77739397	3	-	Pcdh9	-336	0.0017525	0.18002	0.147452	0.132926	17.8268	-1.45269	421
chr15	80321210	80712479	4	-	Klhl1	0	0.211836	0.409019	0.197974	0.212572	19.7182	1.45975	391269
chr15	80712809	80713216	3	-	Klhl1	0	0.00373901	0.119309	0.097388	0.104203	11.557	0.681512	407
chr15	84748446	84749663	4	-	Klf12	0	0.00623521	0.136182	0.053709	0.0498415	12.9946	-0.386746	1217
chr15	86476391	86505031	6	-	LOC692034	0	0.568751	0.624624	0.906444	0.953331	5.58732	4.6887	28640
chr15	87389749	87389820	6	-	Kctd12	0	0.00304479	0.0798282	0.0493718	0.0456036	7.67834	-0.376826	71
chr15	87389848	87389940	3	-	Kctd12	0	0.0422658	0.205795	0.159567	0.134923	16.353	-2.46447	92
chr15	87847336	87847357	3	+	Slain1	15476	0.00490037	0.109917	0.0783118	0.0724762	10.5016	-0.583556	21
chr15	88628793	88669924	7	-	Rnf219	0	0.0170559	0.120411	0.0911219	0.0855247	10.3355	-0.559728	41131
chr15	89005185	89083419	5	+	LOC102550758	0	0.293216	0.358376	0.412598	0.395923	6.51596	-1.66747	78234
chr15	89339381	89407510	8	-	LOC692038	0	0.174656	0.23196	0.205276	0.176997	5.73047	-2.82793	68129
chr15	89407733	89407765	4	+	Ndfip2	0	0.00421053	0.0806277	0.0393056	0.0519071	7.64171	1.26015	32
chr15	89526518	89659226	18	+	LOC100364974	0	0.412288	0.467477	0.547706	0.541619	5.51894	-0.608745	132708
chr15	90175545	90175775	3	-	Spry2	0	0.00601884	0.127919	0.0700953	0.0775525	12.19	0.745717	230
chr15	90179605	90179644	3	-	Spry2	-1785	0.00638507	0.0858339	0.0618703	0.0575495	7.94488	-0.432076	39
chr15	93667615	93667722	5	-	Fbxl3	-221	0.00281864	0.0693429	0.0361235	0.0355313	6.65242	-0.0592171	107
chr15	96820787	96824499	3	+	Slitrk5	0	0.0303368	0.210904	0.160903	0.137554	18.0567	-2.33487	3712
chr15	100178683	100282855	6	+	Mir17	0	0.10282	0.21198	0.170339	0.156138	10.916	-1.4201	104172
chr15	102166136	102166195	3	+	Gpc6	0	0.00999128	0.114477	0.115865	0.110872	10.4486	-0.499259	59
chr15	102965204	102984127	13	+	Gpc6	0	0.422323	0.315233	0.462829	0.38211	-10.709	-8.07194	18923
chr15	103078571	103081316	4	+	Gpc6	0	0.331787	0.437182	0.419288	0.377781	10.5395	-4.15074	2745
chr15	103436472	103440302	15	-	Sox21	0	0.0141659	0.122567	0.080414	0.0733559	10.8401	-0.705811	3830
chr15	103927739	103927762	3	-	Abcc4	0	0.0683269	0.126099	0.15859	0.127303	5.7772	-3.12871	23
chr15	104404861	104404944	4	-	Uggt2	0	0.00936991	0.134503	0.0852711	0.0826387	12.5133	-0.263236	83
chr15	104448526	104448657	10	+	Hs6st3	0	0.00514869	0.0915565	0.0563187	0.0508985	8.64078	-0.542021	131
chr15	105555538	105673591	17	+	LOC102551086	0	0.401006	0.479841	0.476621	0.500502	7.88351	2.38807	118053
chr15	106257966	106317840	16	+	Ipo5	0	0.515301	0.591239	0.460758	0.461537	7.59384	0.0778955	59874
chr15	108645000	108662414	10	+	Clybl	0	0.258285	0.343299	0.203196	0.137025	8.50138	-6.61716	17414
chr15	108883544	108887189	16	-	Zic5	4804	0.0119778	0.0863523	0.0717331	0.0673854	7.43745	-0.434766	3645
chr15	108896827	108896962	4	-	Zic5	0	0.00440969	0.0807522	0.034377	0.0311929	7.63425	-0.318413	135
chr15	108908697	108908737	5	+	Zic2	0	0.00787355	0.0711271	0.0471197	0.0417011	6.32536	-0.541864	40
chr15	108908779	108908869	6	+	Zic2	0	0.00526252	0.122291	0.0762013	0.0716842	11.7029	-0.451711	90
chr15	108924340	108924394	5	-	LOC680926	0	0.00611586	0.083219	0.0677526	0.0508755	7.71031	-1.68771	54
chr16	755822	755865	3	-	Polr3a	0	0.00871424	0.0732161	0.0477754	0.0307183	6.45019	-1.70571	43
chr16	1671155	1671196	3	+	LOC103693861	24921	0.00645933	0.1215	0.0938814	0.0994178	11.5041	0.553645	41
chr16	1894655	1894686	3	+	Zmiz1	0	0.0145373	0.0832799	0.0558316	0.0500343	6.87425	-0.579729	31
chr16	2227070	2227120	3	-	Slmap	0	0.00208993	0.0727065	0.0513395	0.0422657	7.06166	-0.907387	50
chr16	2958300	2958341	3	+	Arhgef3	0	0.0440989	0.16313	0.110073	0.0970429	11.9032	-1.30303	41
chr16	3139211	3139296	3	-	Ccdc66	-25	0.00136519	0.121956	0.0819155	0.0668064	12.0591	-1.51091	85
chr16	3258754	3402471	7	-	LOC103693877	0	0.572265	0.63356	0.962668	0.967834	6.12952	0.516547	143717
chr16	4469449	4469482	3	+	Wnt5a	0	0.00466966	0.13106	0.109104	0.1	12.639	-0.910378	33
chr16	5949878	5950066	3	+	LOC100360125	9048	0.116945	0.217833	0.141874	0.154836	10.0888	1.29624	188
chr16	6077837	6078003	6	-	Il17rb	0	0.0377208	0.112236	0.0677876	0.0708886	7.45154	0.310098	166
chr16	6685048	6685257	3	-	Prkcd	-9303	0.0087035	0.0807348	0.0701152	0.0521606	7.20313	-1.79547	209
chr16	6903562	6903602	3	+	Tmem110	0	0.00785276	0.104814	0.0591338	0.0604366	9.69612	0.130276	40
chr16	7082133	7082180	3	-	Spcs1	-177	0.00253101	0.0754796	0.0403853	0.0475298	7.29486	0.71445	47
chr16	7588907	7588981	3	+	Eaf1	0	0.00396419	0.15735	0.106364	0.0923734	15.3386	-1.3991	74
chr16	7952122	7952414	3	+	LOC103693898	-26731	0.00245702	0.139743	0.146414	0.106722	13.7286	-3.96916	292
chr16	8303009	8303100	5	+	Ncoa4	0	0.00512337	0.102912	0.063053	0.0723007	9.77888	0.924766	91
chr16	8303144	8309263	3	+	Ncoa4	0	0.0290666	0.162473	0.118204	0.111643	13.3406	-0.656043	6119
chr16	8822092	8822233	3	+	Drgx	1640	0.0823646	0.250215	0.203456	0.167611	16.785	-3.58447	141
chr16	8822319	8823936	11	+	Drgx	0	0.0209419	0.158555	0.115212	0.103322	13.7613	-1.18894	1617
chr16	8824577	8830219	11	+	Drgx	0	0.0218852	0.121521	0.0892389	0.0731244	9.96354	-1.61145	5642
chr16	9563255	9563324	3	+	Arhgap22	0	0.0798115	0.161024	0.0608482	0.0675841	8.12122	0.673594	69
chr16	9563389	9563418	6	+	Arhgap22	0	0.00608246	0.0701925	0.0506856	0.0450719	6.411	-0.561373	29
chr16	10534556	10534584	3	-	Gprin2	0	0.00310459	0.0742459	0.0353797	0.0423767	7.11413	0.699697	28
chr16	10534617	10537356	7	-	Gprin2	0	0.134846	0.219736	0.0348239	0.0304386	8.489	-0.438532	2739
chr16	10554135	10554369	3	+	Syt15	0	0.0091545	0.134077	0.0553036	0.0513074	12.4922	-0.399617	234
chr16	10851647	10851690	3	-	Ldb3	26666	0.00821524	0.0959779	0.0686275	0.0629992	8.77626	-0.562825	43
chr16	10851737	10851796	4	-	Ldb3	26560	0.0226583	0.0974305	0.0695018	0.061039	7.47722	-0.846275	59
chr16	10903201	10924091	12	-	Ldb3	0	0.265509	0.323325	0.31151	0.3147	5.78163	0.31902	20890
chr16	11028868	11028937	3	+	Wapl	513	0.00426804	0.10927	0.0667033	0.0788527	10.5002	1.21494	69
chr16	11029217	11029569	9	+	Wapl	0	0.016697	0.119118	0.0526033	0.0547097	10.2421	0.210646	352
chr16	11030015	11117898	10	+	Wapl	0	0.636272	0.73479	0.69554	0.778657	9.85181	8.31174	87883
chr16	14210172	14210268	4	-	Ccser2	0	0.152873	0.239743	0.208706	0.214659	8.68701	0.595366	96
chr16	14383845	14385107	4	-	Ghitm	-1199	0.605286	0.538578	0.557316	0.558505	-6.67081	0.118893	1262
chr16	18975905	19000723	7	+	Smim7	0	0.155312	0.269588	0.101933	0.0971749	11.4276	-0.475778	24818
chr16	19001719	19051768	12	+	Med26	0	0.662149	0.798783	0.696463	0.793522	13.6635	9.7059	50049
chr16	19225214	19225263	3	-	Klf2	-178	0.0383016	0.125901	0.0985521	0.0809129	8.75997	-1.76393	49
chr16	19377540	19398756	10	-	Tpm4	0	0.531193	0.596351	0.541603	0.542254	6.51579	0.065101	21216
chr16	19777468	19777559	4	-	Nr2f6	-55	0.0275491	0.132287	0.103628	0.101625	10.4738	-0.200281	91
chr16	19793544	19800855	4	+	Babam1	0	0.147331	0.273164	0.198393	0.215377	12.5834	1.69837	7311
chr16	19800922	19855433	19	+	Ankle1	0	0.135622	0.216937	0.208775	0.201005	8.13147	-0.777029	54511
chr16	19877777	19877996	6	+	Dda1	0	0.0031668	0.119568	0.080305	0.0823284	11.6401	0.20234	219
chr16	19897474	19897538	3	+	Gtpbp3	0	0.0052356	0.12145	0.0855717	0.0758895	11.6214	-0.968224	64
chr16	19993118	19999790	3	-	Nxnl1	0	0.00547133	0.0940514	0.240307	0.229093	8.85801	-1.12146	6672
chr16	20040302	20057080	14	+	Colgalt1	0	0.430374	0.512539	0.3554	0.380992	8.2165	2.55926	16778
chr16	20153143	20190094	3	-	Fcho1	0	0.58482	0.684193	0.366423	0.38122	9.9373	1.47973	36951
chr16	20317555	20317946	3	+	Ccdc124	0	0.068459	0.202416	0.145052	0.145401	13.3957	0.0348327	391
chr16	20317977	20325326	9	+	Ccdc124	0	0.116768	0.23432	0.156949	0.172424	11.7551	1.54751	7349
chr16	20325589	20325678	4	+	Ccdc124	-2325	0.00517525	0.129915	0.0982407	0.0986295	12.474	0.0388717	89
chr16	20326146	20327602	8	+	Ccdc124	-2882	0.0159528	0.12418	0.0520349	0.0280635	10.8227	-2.39714	1456
chr16	20377220	20387360	10	-	Il12rb1	0	0.284303	0.389353	0.308586	0.423611	10.5051	11.5025	10140
chr16	20400735	20415546	26	+	Mast3	0	0.445636	0.565576	0.515946	0.608067	11.9939	9.21209	14811
chr16	20416243	20416524	3	+	Pik3r2	0	0.00169408	0.123553	0.0706326	0.0680281	12.1859	-0.260449	281
chr16	20502413	20511472	6	-	Lsm4	0	0.319541	0.420701	0.37663	0.385105	10.1161	0.847453	9059
chr16	20511508	20511554	3	-	Lsm4	0	0.0056304	0.104056	0.0544702	0.0535381	9.84253	-0.0932156	46
chr16	20577057	20577918	4	+	Ssbp4	199	0.0143869	0.10368	0.03897	0.0277972	8.92932	-1.11728	861
chr16	20592291	20641872	11	-	Isyna1	0	0.152886	0.208779	0.177155	0.174737	5.58926	-0.241819	49581
chr16	20656352	20656958	4	+	Kxd1	0	0.453704	0.576788	0.612252	0.781672	12.3084	16.942	606
chr16	20668921	20668966	3	+	Uba52	0	0.00304609	0.150032	0.104418	0.100408	14.6986	-0.401005	45
chr16	20684935	20685384	3	-	Crlf1	0	0.00689992	0.142146	0.0867234	0.082706	13.5246	-0.401734	449
chr16	20685571	20685631	4	-	Crlf1	0	0.006406	0.113658	0.0693856	0.0608344	10.7252	-0.855124	60
chr16	20804145	20804189	4	-	Comp	0	0.00521511	0.0710549	0.0422935	0.0292117	6.58398	-1.30818	44
chr16	20804205	20804419	4	-	Comp	0	0.00429464	0.0746089	0.0460393	0.0457804	7.03143	-0.0258914	214
chr16	20806239	20806336	4	-	Comp	0	0.00356104	0.0681468	0.0369689	0.0427855	6.45858	0.581665	97
chr16	20806356	20806553	3	-	Comp	0	0.102923	0.183617	0.13609	0.145811	8.06944	0.972149	197
chr16	21017209	21029090	14	-	Mef2b	0	0.247168	0.338811	0.300611	0.308678	9.16427	0.80668	11881
chr16	21038812	21038886	3	-	Nr2c2ap	0	0.0452461	0.122295	0.0942228	0.0927998	7.70489	-0.142299	74
chr16	21079701	21083969	20	-	Hapln4	0	0.367549	0.421681	0.464824	0.469374	5.41321	0.454979	4268
chr16	21198068	21198211	3	+	Gatad2a	0	0.114458	0.178854	0.115324	0.108529	6.43962	-0.679482	143
chr16	21273198	21273617	5	-	Tssk6	0	0.0425322	0.161424	0.110164	0.103038	11.8892	-0.712617	419
chr16	21338561	21362708	26	-	Pbx4	0	0.238753	0.291178	0.247043	0.241689	5.24248	-0.535388	24147
chr16	21379827	21379865	3	-	Atp13a1	0	0.00730458	0.0756944	0.0498866	0.0480931	6.83899	-0.179349	38
chr16	21379908	21379942	3	-	Atp13a1	0	0.0191048	0.0872601	0.0508784	0.0420712	6.81553	-0.880724	34
chr16	22250818	22317092	11	+	Lzts1	0	0.15206	0.215579	0.320698	0.322331	6.35187	0.163254	66274
chr16	22561079	22561197	3	-	Lpl	0	0.00475943	0.0817385	0.0481067	0.0465498	7.6979	-0.155687	118
chr16	22561367	22647068	5	-	Lpl	0	0.475456	0.568505	0.574656	0.58484	9.3049	1.01844	85701
chr16	24612303	24612345	3	-	Naf1	0	0.00592109	0.161511	0.100384	0.0908296	15.559	-0.955449	42
chr16	26859422	26859465	3	+	Msmo1	0	0.00130208	0.124804	0.0710619	0.078024	12.3502	0.696213	43
chr16	27399790	27399821	4	+	Tll1	0	0.00385185	0.100216	0.0706453	0.0732673	9.63646	0.262205	31
chr16	31313881	31687070	5	-	LOC100911190	0	0.293066	0.411826	0.358445	0.35207	11.876	-0.637433	373189
chr16	31866505	31866738	7	+	Palld	0	0.00749913	0.114792	0.0683336	0.0615343	10.7292	-0.679932	233
chr16	31972251	31972386	5	-	Cbr4	0	0.00546987	0.0673383	0.0389509	0.0334403	6.18684	-0.551063	135
chr16	32227945	32250599	6	-	Sh3rf1	-2169	0.0713278	0.152751	0.126492	0.111358	8.14233	-1.51338	22654
chr16	32448989	32449097	4	+	Clcn3	0	0.00591741	0.119178	0.0760384	0.0637174	11.3261	-1.2321	108
chr16	32777136	32777200	3	-	Mfap3l	-23859	0.00773681	0.0836847	0.0381443	0.039648	7.59479	0.150371	64
chr16	34083644	34552730	9	-	LOC103693940	0	0.586128	0.699195	0.558387	0.625804	11.3067	6.74163	469086
chr16	34552756	34552900	3	+	Galntl6	1067	0.00735033	0.136286	0.139282	0.149679	12.8936	1.03966	144
chr16	35935891	35935917	3	+	Galnt7	0	0.00404878	0.121096	0.0967078	0.0984552	11.7047	0.174736	26
chr16	36116089	36116117	3	+	Sap30	0	0	0.117386	0.262857	0.294118	11.7386	3.12605	28
chr16	36116182	36116208	3	+	Sap30	0	0.00350877	0.0645421	0.0447364	0.033913	6.10333	-1.08233	26
chr16	36288674	36295573	14	+	LOC103693946	171	0.0557288	0.146966	0.152798	0.155459	9.12373	0.266085	6899
chr16	36300755	36300888	6	-	LOC103693947	0	0.00381577	0.128867	0.0743281	0.0772261	12.5051	0.289798	133
chr16	36300952	36301195	4	-	LOC103693947	0	0.00362917	0.20968	0.117632	0.112466	20.605	-0.516633	243
chr16	36382520	36444629	11	-	Hand2	-8887	0.151896	0.260418	0.188189	0.194411	10.8522	0.622159	62109
chr16	36450638	37097785	24	+	LOC103693950	0	0.393513	0.475401	0.497124	0.495388	8.18876	-0.173606	647147
chr16	37097940	37172620	6	-	Fbxo8	0	0.402386	0.491772	0.35503	0.362365	8.93863	0.733458	74680
chr16	40820296	41079612	3	+	Neil3	0	0.619035	0.73617	0.72033	0.736097	11.7136	1.57669	259316
chr16	41581362	41939643	5	-	Pabpc1-ps1	0	0.437756	0.562606	0.572131	0.574153	12.4851	0.202165	358281
chr16	42202840	42939224	9	-	RGD1560648	0	0.710191	0.803107	0.679125	0.775715	9.29162	9.65901	736384
chr16	47369021	47369103	3	+	Wwc2	0	0.00163765	0.138094	0.0509428	0.0492802	13.6457	-0.166268	82
chr16	47718752	47718851	4	+	Ing2	0	0.0161314	0.104102	0.051947	0.0408497	8.79708	-1.10973	99
chr16	47719006	47719308	3	+	Ing2	0	0.0311618	0.153781	0.100677	0.0882749	12.2619	-1.24021	302
chr16	48920967	48921121	5	-	Cenpu	0	0.00254435	0.132437	0.0787148	0.0794187	12.9892	0.0703977	154
chr16	49003598	49003691	10	-	Acsl1	0	0.00620062	0.0825601	0.0605842	0.0624453	7.63595	0.186108	93
chr16	50082253	50111692	9	+	Fam149a	0	0.248461	0.362952	0.370076	0.385746	11.449	1.567	29439
chr16	50498633	50498775	6	-	Fat1	0	0.00358471	0.0965604	0.0695811	0.0722577	9.29757	0.267656	142
chr16	50501094	50501601	4	-	Fat1	0	0.0059165	0.105755	0.0768987	0.0750635	9.98385	-0.183517	507
chr16	51860568	52015390	9	+	Zfp42	1191	0.423391	0.484188	0.42931	0.408393	6.07971	-2.09168	154822
chr16	54898997	54899063	3	-	Vps37a	0	0.00324328	0.188203	0.128288	0.100496	18.496	-2.77923	66
chr16	54899113	54899184	3	-	Vps37a	0	0.00543881	0.198365	0.0701884	0.0649759	19.2926	-0.521249	71
chr16	54899262	54899409	4	-	Vps37a	0	0.0374912	0.112836	0.118429	0.108107	7.53453	-1.03225	147
chr16	57137109	57148991	3	+	Sgcz	0	0.0371021	0.155418	0.108875	0.109461	11.8315	0.0585895	11882
chr16	59366578	59366592	3	-	RGD1304810	0	0.00493142	0.103249	0.0685786	0.057987	9.83173	-1.05917	14
chr16	60208648	60208688	4	-	Mfhas1	-104	0.00511684	0.0922478	0.0602131	0.0565915	8.7131	-0.362163	40
chr16	60307329	60307656	4	+	Eri1	0	0.00111509	0.147221	0.0411629	0.0404466	14.6106	-0.0716244	327
chr16	60426750	60514445	11	-	Ppp1r3b	0	0.324985	0.421285	0.460505	0.450366	9.63005	-1.01388	87695
chr16	61089718	61090566	9	-	Dusp4	0	0.00309682	0.112142	0.0671749	0.0629772	10.9046	-0.419767	848
chr16	61091665	61091999	4	-	Dusp4	-693	0.00361881	0.111822	0.0269219	0.0192466	10.8203	-0.767531	334
chr16	61092065	61093584	6	-	Dusp4	-1093	0.0124486	0.152974	0.112355	0.101879	14.0526	-1.04757	1519
chr16	61759193	61759292	4	+	Leprotl1	0	0.0887364	0.176082	0.147655	0.142055	8.73453	-0.560035	99
chr16	61782905	61795452	10	-	Mboat4	0	0.27415	0.332288	0.357298	0.347674	5.81381	-0.962413	12547
chr16	61954828	61955043	3	+	Rbpms	0	0.00364078	0.11293	0.0245399	0.0251396	10.9289	0.0599713	215
chr16	62164319	62164342	3	-	Gtf2e2	0	0.00125	0.0812053	0.0564491	0.0402526	7.99553	-1.61965	23
chr16	62252794	62252880	7	+	Ubxn8	0	0.00351482	0.0694729	0.0441017	0.0433065	6.59581	-0.0795192	86
chr16	62969916	62969938	3	+	Nrg1	51	0.00083612	0.0669413	0.0406336	0.0392487	6.61052	-0.138491	22
chr16	68814379	68833056	4	-	Poteg	0	0.21984	0.328837	0.220264	0.20572	10.8997	-1.45437	18677
chr16	68968129	68968337	5	-	Eif4ebp1	0	0.00348856	0.0900281	0.0389271	0.0422486	8.65395	0.332148	208
chr16	68968494	69005127	5	+	Adrb3	0	0.0077794	0.115132	0.173301	0.165822	10.7353	-0.747898	36633
chr16	69132401	69132483	5	-	Adgra2	0	0.00324469	0.0847643	0.0614143	0.0572022	8.15196	-0.421209	82
chr16	69132552	69132576	3	-	Adgra2	0	0.00435969	0.132351	0.0840548	0.0770302	12.7992	-0.702467	24
chr16	69236992	69237263	3	-	Zfp703	595	0.0369672	0.142589	0.0838919	0.0527071	10.5622	-3.11848	271
chr16	69241741	69242352	3	-	Zfp703	0	0.156228	0.290752	0.250668	0.243573	13.4524	-0.709506	611
chr16	70709843	70709860	3	-	Rnf170	0	0.00446429	0.0669479	0.0391779	0.0350984	6.24836	-0.407949	17
chr16	70710100	70710173	4	-	Rnf170	0	0.0388123	0.113305	0.136415	0.130968	7.44926	-0.54469	73
chr16	70710552	70710760	5	+	Hook3	0	0.15163	0.233366	0.205169	0.198049	8.17357	-0.712025	208
chr16	71057881	71058068	3	+	Bag4	0	0.00806867	0.095546	0.0841685	0.0545244	8.74773	-2.96441	187
chr16	71236801	71236926	3	-	Whsc1l1	0	0.00155823	0.133544	0.0831188	0.0722969	13.1985	-1.08219	125
chr16	71237180	71241600	6	+	Letm2	0	0.00319458	0.089405	0.0470437	0.0579838	8.62104	1.09401	4420
chr16	71724775	71724809	3	+	Plekha2	851	0.00290698	0.0875595	0.050613	0.0460669	8.46526	-0.454614	34
chr16	71788542	71809520	6	+	Htra4	0	0.571787	0.501297	0.751002	0.666686	-7.04897	-8.43157	20978
chr16	73912469	73912546	3	-	Ank1	0	0.00641026	0.104359	0.00925926	0	9.79487	-0.925926	77
chr16	74072763	74073973	6	-	LOC102556951	0	0.0974866	0.189436	0.163461	0.138269	9.19489	-2.51918	1210
chr16	74407900	74407973	5	-	Slc20a2	0	0.101402	0.177167	0.162183	0.159978	7.57645	-0.220487	73
chr16	75855522	75855847	3	-	Agpat5	0	0.105308	0.247246	0.114094	0.105313	14.1938	-0.878105	325
chr16	77152498	77152637	6	+	Csmd1	187	0.00724726	0.127208	0.0900025	0.0627116	11.9961	-2.7291	139
chr16	77152966	77153258	5	+	Csmd1	0	0.0435434	0.165186	0.0831146	0.0773293	12.1642	-0.57853	292
chr16	77153293	77153627	4	+	Csmd1	0	0.00568651	0.0922592	0.0488775	0.0529212	8.65727	0.404377	334
chr16	77154977	77274372	4	+	Csmd1	0	0.498471	0.561735	0.0816993	0.0653846	6.32636	-1.63147	119395
[truncated: 3,329 more rows]

## Sheet: S3
Supplemental Table 3. Gene ontology enrichment for significant DMRs (q < 0.05) with ≥ 10x coverage depth, ≥ 3 CpGs, and window length < 1kb (3,866) identified between PND65 and PND120 among control and/or BDE-47 exposed animals.
GroupID	Category	Term	Description	LogP	Log(q-value)	InTerm_InList	Genes	Symbols
1_Summary	GO Biological Processes	GO:0009792	embryo development ending in birth or egg hatching	-32.3976	-28.4351	207/744	24165,24170,24209,24252,24329,24517,24577,24628,24705,24771,24817,24851,25022,25099,25267,25444,25478,25484,25495,25497,25509,25546,25631,25636,25640,29154,29203,29258,29349,29560,29577,54254,54284,58823,58976,60443,60584,64547,64566,64865,65165,66019,78963,79433,81504,81519,81640,81809,81810,83476,83611,83807,84010,84399,84584,85471,89830,113984,114029,114109,114208,114487,114502,114561,114634,1…	Ada,Add1,Ascl2,Cebpa,Egfr,Junb,Myc,Pdgfb,Rara,Sdc4,Hnf1a,Tpm1,Fgfr2,Foxa2,Pdgfra,Fgf9,Man2a1,Myo1e,Nog,Nup50,Pax6,Shox2,Smad3,Prkaca,Hnf1b,Capn2,Foxd3,Rps7,Fgf8,Hif1a,Hes1,Gata4,Pitx2,Nckap1,Slc30a1,Epn2,Lif,Bcl2l11,Wnt5a,Pcdh8,Tmed2,Cdx2,Apaf1,Myh10,Grb2,Mgat1,Amd1,Tgfb2,Tgfbr2,Cyr61,Apba3,Ybx3,Dll1,Ihh,Ncoa3,Gata3,Ptch1,Nr2f2,Megf8,Nkx2-5,Skil,Wnt2,Pax3,Pitpnb,Six1,Cdk5r1,Bhlhe41,Wnt11,Gli3,Lef…
1_Member	GO Biological Processes	GO:0009792	embryo development ending in birth or egg hatching	-32.3976	-28.4351	207/744	24165,24170,24209,24252,24329,24517,24577,24628,24705,24771,24817,24851,25022,25099,25267,25444,25478,25484,25495,25497,25509,25546,25631,25636,25640,29154,29203,29258,29349,29560,29577,54254,54284,58823,58976,60443,60584,64547,64566,64865,65165,66019,78963,79433,81504,81519,81640,81809,81810,83476,83611,83807,84010,84399,84584,85471,89830,113984,114029,114109,114208,114487,114502,114561,114634,1…	Ada,Add1,Ascl2,Cebpa,Egfr,Junb,Myc,Pdgfb,Rara,Sdc4,Hnf1a,Tpm1,Fgfr2,Foxa2,Pdgfra,Fgf9,Man2a1,Myo1e,Nog,Nup50,Pax6,Shox2,Smad3,Prkaca,Hnf1b,Capn2,Foxd3,Rps7,Fgf8,Hif1a,Hes1,Gata4,Pitx2,Nckap1,Slc30a1,Epn2,Lif,Bcl2l11,Wnt5a,Pcdh8,Tmed2,Cdx2,Apaf1,Myh10,Grb2,Mgat1,Amd1,Tgfb2,Tgfbr2,Cyr61,Apba3,Ybx3,Dll1,Ihh,Ncoa3,Gata3,Ptch1,Nr2f2,Megf8,Nkx2-5,Skil,Wnt2,Pax3,Pitpnb,Six1,Cdk5r1,Bhlhe41,Wnt11,Gli3,Lef…
1_Member	GO Biological Processes	GO:0043009	chordate embryonic development	-32.3914	-28.4351	204/728	24165,24170,24209,24252,24329,24517,24577,24628,24705,24771,24817,24851,25022,25099,25267,25444,25478,25484,25495,25497,25509,25546,25631,25636,25640,29154,29203,29258,29349,29560,29577,54254,54284,58823,58976,60443,60584,64547,64566,64865,65165,66019,78963,79433,81504,81519,81640,81809,81810,83476,83611,83807,84010,84399,84584,85471,89830,113984,114029,114109,114208,114487,114502,114561,114634,1…	Ada,Add1,Ascl2,Cebpa,Egfr,Junb,Myc,Pdgfb,Rara,Sdc4,Hnf1a,Tpm1,Fgfr2,Foxa2,Pdgfra,Fgf9,Man2a1,Myo1e,Nog,Nup50,Pax6,Shox2,Smad3,Prkaca,Hnf1b,Capn2,Foxd3,Rps7,Fgf8,Hif1a,Hes1,Gata4,Pitx2,Nckap1,Slc30a1,Epn2,Lif,Bcl2l11,Wnt5a,Pcdh8,Tmed2,Cdx2,Apaf1,Myh10,Grb2,Mgat1,Amd1,Tgfb2,Tgfbr2,Cyr61,Apba3,Ybx3,Dll1,Ihh,Ncoa3,Gata3,Ptch1,Nr2f2,Megf8,Nkx2-5,Skil,Wnt2,Pax3,Pitpnb,Six1,Bhlhe41,Wnt11,Gli3,Lef1,Icmt,…
1_Member	GO Biological Processes	GO:0048598	embryonic morphogenesis	-30.9189	-27.1833	188/659	24388,24577,24705,24771,24817,25022,25099,25267,25444,25495,25497,25509,25546,25631,25636,25640,25661,25724,25744,29258,29349,29535,29560,29577,50566,54251,54254,54264,54284,58819,58823,58853,59114,59312,64547,64566,64865,65165,78963,81008,81504,81666,81809,81810,83476,83727,84010,84017,84399,84577,84584,85471,85490,89830,113983,114029,114109,114487,114502,114523,114634,116466,116499,140433,14058…	Gfi1,Myc,Rara,Sdc4,Hnf1a,Fgfr2,Foxa2,Pdgfra,Fgf9,Nog,Nup50,Pax6,Shox2,Smad3,Prkaca,Hnf1b,Fn1,Itgb4,Nf2,Rps7,Fgf8,Pdx1,Hif1a,Hes1,Grem1,Flt1,Gata4,Mafb,Pitx2,Txnrd1,Nckap1,Nr4a3,Slc9a3r1,Shank3,Bcl2l11,Wnt5a,Pcdh8,Tmed2,Apaf1,Itga7,Grb2,Gnaq,Tgfb2,Tgfbr2,Cyr61,Fbn1,Dll1,Hmga2,Ihh,Hdac2,Ncoa3,Gata3,Col5a1,Ptch1,Pitx1,Megf8,Nkx2-5,Wnt2,Pax3,Ntn1,Six1,Wnt2b,Fgf4,Lama5,Wnt11,Gli3,Lef1,Syf2,Foxc2,Ipmk,…
1_Member	GO Biological Processes	GO:0002009	morphogenesis of an epithelium	-30.8386	-27.1833	166/546	24329,24373,24577,24628,24695,24705,24771,24883,25022,25099,25266,25267,25495,25497,25628,25631,25636,25640,25697,29146,29258,29349,29535,29560,29577,29748,50566,54231,54251,54254,54284,56718,58823,59114,59312,60584,64373,64566,64826,64865,65165,78963,78965,81504,81809,81810,83466,83476,83629,83718,84010,84017,84399,84489,84584,85471,85490,89830,114029,114109,114487,114502,114523,114634,116466,14…	Egfr,Fst,Myc,Pdgfb,Pthlh,Rara,Sdc4,Wt1,Fgfr2,Foxa2,Pdgfa,Pdgfra,Nog,Nup50,Nkx2-1,Smad3,Prkaca,Hnf1b,Ctsl,Jag1,Rps7,Fgf8,Pdx1,Hif1a,Hes1,Ppp3r1,Grem1,Car2,Flt1,Gata4,Pitx2,Mtor,Nckap1,Slc9a3r1,Shank3,Lif,Rhob,Wnt5a,Foxq1,Pcdh8,Tmed2,Apaf1,Csf1,Grb2,Tgfb2,Tgfbr2,Celsr3,Cyr61,Slc12a2,Clic4,Dll1,Hmga2,Ihh,Fgfr3,Ncoa3,Gata3,Col5a1,Ptch1,Megf8,Nkx2-5,Wnt2,Pax3,Ntn1,Six1,Wnt2b,Lama5,Wnt11,Gli3,Runx3,Lef…
1_Member	GO Biological Processes	GO:0048729	tissue morphogenesis	-29.3325	-25.7742	187/671	24329,24373,24577,24628,24695,24705,24771,24817,24851,24883,25022,25099,25266,25267,25495,25497,25546,25628,25631,25636,25640,25697,25724,25744,29146,29258,29349,29535,29560,29577,29748,50566,54231,54251,54254,54284,56718,58819,58823,58853,59114,59312,60584,64373,64566,64826,64865,65165,78963,78965,81504,81516,81527,81809,81810,83466,83476,83629,83718,84010,84017,84399,84489,84584,85471,85490,898…	Egfr,Fst,Myc,Pdgfb,Pthlh,Rara,Sdc4,Hnf1a,Tpm1,Wt1,Fgfr2,Foxa2,Pdgfa,Pdgfra,Nog,Nup50,Shox2,Nkx2-1,Smad3,Prkaca,Hnf1b,Ctsl,Itgb4,Nf2,Jag1,Rps7,Fgf8,Pdx1,Hif1a,Hes1,Ppp3r1,Grem1,Car2,Flt1,Gata4,Pitx2,Mtor,Txnrd1,Nckap1,Nr4a3,Slc9a3r1,Shank3,Lif,Rhob,Wnt5a,Foxq1,Pcdh8,Tmed2,Apaf1,Csf1,Grb2,Smad7,Nrp2,Tgfb2,Tgfbr2,Celsr3,Cyr61,Slc12a2,Clic4,Dll1,Hmga2,Ihh,Fgfr3,Ncoa3,Gata3,Col5a1,Ptch1,Megf8,Nkx2-5,W…
1_Member	GO Biological Processes	GO:0060562	epithelial tube morphogenesis	-28.6754	-25.1962	127/374	24577,24695,24705,24771,24883,25022,25099,25267,25495,25497,25628,25631,25636,25640,25697,29258,29349,29560,29577,29748,50566,54251,54254,54284,58823,59312,64373,64566,65165,78963,78965,81809,81810,83629,83718,84010,84017,84399,84584,85471,89830,114029,114109,114487,114502,114523,114634,116466,140433,140584,140588,161452,171287,171293,171299,171356,171458,252833,266715,282581,287715,287867,289229…	Myc,Pthlh,Rara,Sdc4,Wt1,Fgfr2,Foxa2,Pdgfra,Nog,Nup50,Nkx2-1,Smad3,Prkaca,Hnf1b,Ctsl,Rps7,Fgf8,Hif1a,Hes1,Ppp3r1,Grem1,Flt1,Gata4,Pitx2,Nckap1,Shank3,Rhob,Wnt5a,Tmed2,Apaf1,Csf1,Tgfb2,Tgfbr2,Slc12a2,Clic4,Dll1,Hmga2,Ihh,Ncoa3,Gata3,Ptch1,Megf8,Nkx2-5,Wnt2,Pax3,Ntn1,Six1,Wnt2b,Lama5,Wnt11,Gli3,Lef1,Epha7,Ctsd,Foxd1,Foxc2,Ipmk,Gdf7,Fzd3,Fzd6,Wnk4,Ccdc40,Vangl2,Gatad2a,Col4a1,Hhip,Pax2,Ovol2,Foxp1,Ar…
1_Member	GO Biological Processes	GO:0048568	embryonic organ development	-25.5576	-22.1454	148/506	24165,24209,24252,24329,24388,24517,24577,24628,24705,24831,25022,25257,25266,25267,25444,25495,25509,25546,25585,25628,25631,25640,29203,29349,29560,29577,54254,54264,54284,58823,58853,59114,60443,60584,64566,65165,66019,81504,81809,81810,83476,83727,84010,84399,84584,85471,89830,113984,114029,114109,114487,114523,114634,140584,140588,161452,170933,171356,192274,266715,282581,287662,287745,28786…	Ada,Ascl2,Cebpa,Egfr,Gfi1,Junb,Myc,Pdgfb,Rara,Thrb,Fgfr2,Gamt,Pdgfa,Pdgfra,Fgf9,Nog,Pax6,Shox2,Id3,Nkx2-1,Smad3,Hnf1b,Foxd3,Fgf8,Hif1a,Hes1,Gata4,Mafb,Pitx2,Nckap1,Nr4a3,Slc9a3r1,Epn2,Lif,Wnt5a,Tmed2,Cdx2,Grb2,Tgfb2,Tgfbr2,Cyr61,Fbn1,Dll1,Ihh,Ncoa3,Gata3,Ptch1,Nr2f2,Megf8,Nkx2-5,Wnt2,Ntn1,Six1,Wnt11,Gli3,Lef1,Syf2,Foxc2,Foxe1,Fzd3,Fzd6,Pcgf2,Plcd3,Ccdc40,Hoxd4,Vangl2,Gtpbp3,Eya4,Erf,Hmx3,Hmx2,Phl…
1_Member	GO Biological Processes	GO:0048562	embryonic organ morphogenesis	-19.5502	-16.372	100/321	24388,24577,25022,25267,25444,25495,25509,25546,25631,25640,29349,29560,29577,54254,54264,54284,58823,58853,59114,64566,65165,81809,81810,83727,84010,84399,85471,114029,114109,114523,114634,140584,140588,171356,192274,266715,282581,287662,287867,288153,289229,292172,293537,293538,293992,296201,296499,296511,297867,298496,298555,298878,299138,300128,303181,303586,303811,303968,304495,306141,306782…	Gfi1,Myc,Fgfr2,Pdgfra,Fgf9,Nog,Pax6,Shox2,Smad3,Hnf1b,Fgf8,Hif1a,Hes1,Gata4,Mafb,Pitx2,Nckap1,Nr4a3,Slc9a3r1,Wnt5a,Tmed2,Tgfb2,Tgfbr2,Fbn1,Dll1,Ihh,Gata3,Megf8,Nkx2-5,Ntn1,Six1,Wnt11,Gli3,Foxc2,Foxe1,Fzd3,Fzd6,Pcgf2,Ccdc40,Hoxd4,Vangl2,Eya4,Hmx3,Hmx2,Pax2,Ovol2,Dlx2,Alx4,Arid1a,Kcnq4,Grhl3,Osr1,Six4,Celsr1,Wnt3a,Wnt9b,Dvl3,Ift57,Kdm2b,Spry2,Ror2,Tfap2a,Ripor2,Mib1,Sall1,Mesp1,Sobp,Sox17,Chd7,Whrn…
1_Member	GO Biological Processes	GO:0016331	morphogenesis of embryonic epithelium	-18.2137	-15.1605	67/177	24705,24771,25022,25495,25497,25636,25640,29258,29349,29535,29560,50566,58823,59312,64566,64865,65165,78963,81809,85471,89830,114487,114502,114634,116466,140433,171458,252833,266715,282581,289229,290669,293992,296201,297867,298555,298878,299138,300128,301042,301346,303586,303811,303968,304495,306659,306862,307594,307740,308739,309377,310552,311245,311860,313757,315196,315870,353252,361095,361096,…	Rara,Sdc4,Fgfr2,Nog,Nup50,Prkaca,Hnf1b,Rps7,Fgf8,Pdx1,Hif1a,Grem1,Nckap1,Shank3,Wnt5a,Pcdh8,Tmed2,Apaf1,Tgfb2,Gata3,Ptch1,Wnt2,Pax3,Six1,Wnt2b,Lama5,Ipmk,Gdf7,Fzd3,Fzd6,Vangl2,Gatad2a,Pax2,Ovol2,Arid1a,Grhl3,Osr1,Six4,Celsr1,Trim71,Sema4c,Wnt9b,Dvl3,Ift57,Kdm2b,Irx1,Tfap2a,Mib1,Sall1,Rgma,Sfrp5,Sfrp2,Traf6,Abl1,Ski,Wnt7b,Tbx18,Rdh10,Zic5,Zic2,Vasp,Kdm2a,Hectd1,Scrib,Cluap1,Sox4,Phactr4
1_Member	GO Biological Processes	GO:0035148	tube formation	-16.4852	-13.6258	63/171	24705,24771,25022,25495,25497,25636,25640,29227,29258,29349,29560,50566,58823,59312,64547,64566,65165,78963,81809,85471,89830,114502,114634,171458,192126,252833,266715,282581,289229,290669,293992,296201,297867,298555,298878,299138,300128,301042,301346,303586,303811,303968,304495,306659,306862,307594,307740,308739,309377,310552,311245,311860,313757,361095,361096,361517,361700,362736,362938,363544,…	Rara,Sdc4,Fgfr2,Nog,Nup50,Prkaca,Hnf1b,Nfib,Rps7,Fgf8,Hif1a,Grem1,Nckap1,Shank3,Bcl2l11,Wnt5a,Tmed2,Apaf1,Tgfb2,Gata3,Ptch1,Pax3,Six1,Ipmk,Dab2ip,Gdf7,Fzd3,Fzd6,Vangl2,Gatad2a,Pax2,Ovol2,Arid1a,Grhl3,Osr1,Six4,Celsr1,Trim71,Sema4c,Wnt9b,Dvl3,Ift57,Kdm2b,Irx1,Tfap2a,Mib1,Sall1,Rgma,Sfrp5,Sfrp2,Traf6,Abl1,Ski,Zic5,Zic2,Vasp,Kdm2a,Hectd1,Scrib,Cluap1,Sox4,Atoh8,Phactr4
1_Member	GO Biological Processes	GO:0072175	epithelial tube formation	-15.948	-13.153	59/157	24705,24771,25022,25495,25497,25636,25640,29258,29349,29560,50566,58823,59312,64566,65165,78963,81809,85471,89830,114502,114634,171458,252833,266715,282581,289229,290669,293992,296201,297867,298555,298878,299138,300128,301042,301346,303586,303811,303968,304495,306659,306862,307594,307740,308739,309377,310552,311245,311860,313757,361095,361096,361517,361700,362736,362938,363544,364712,682920	Rara,Sdc4,Fgfr2,Nog,Nup50,Prkaca,Hnf1b,Rps7,Fgf8,Hif1a,Grem1,Nckap1,Shank3,Wnt5a,Tmed2,Apaf1,Tgfb2,Gata3,Ptch1,Pax3,Six1,Ipmk,Gdf7,Fzd3,Fzd6,Vangl2,Gatad2a,Pax2,Ovol2,Arid1a,Grhl3,Osr1,Six4,Celsr1,Trim71,Sema4c,Wnt9b,Dvl3,Ift57,Kdm2b,Irx1,Tfap2a,Mib1,Sall1,Rgma,Sfrp5,Sfrp2,Traf6,Abl1,Ski,Zic5,Zic2,Vasp,Kdm2a,Hectd1,Scrib,Cluap1,Sox4,Phactr4
1_Member	GO Biological Processes	GO:0001838	embryonic epithelial tube formation	-15.6862	-12.9474	57/150	24705,24771,25495,25497,25636,25640,29258,29560,50566,58823,59312,64566,65165,78963,81809,85471,89830,114502,114634,171458,252833,266715,282581,289229,290669,293992,296201,297867,298555,298878,299138,300128,301042,301346,303586,303811,303968,304495,306659,306862,307594,307740,308739,309377,310552,311245,311860,313757,361095,361096,361517,361700,362736,362938,363544,364712,682920	Rara,Sdc4,Nog,Nup50,Prkaca,Hnf1b,Rps7,Hif1a,Grem1,Nckap1,Shank3,Wnt5a,Tmed2,Apaf1,Tgfb2,Gata3,Ptch1,Pax3,Six1,Ipmk,Gdf7,Fzd3,Fzd6,Vangl2,Gatad2a,Pax2,Ovol2,Arid1a,Grhl3,Osr1,Six4,Celsr1,Trim71,Sema4c,Wnt9b,Dvl3,Ift57,Kdm2b,Irx1,Tfap2a,Mib1,Sall1,Rgma,Sfrp5,Sfrp2,Traf6,Abl1,Ski,Zic5,Zic2,Vasp,Kdm2a,Hectd1,Scrib,Cluap1,Sox4,Phactr4
1_Member	GO Biological Processes	GO:0021915	neural tube development	-15.3906	-12.6647	65/188	24705,24771,25099,25495,25497,25509,25636,29258,29349,29560,29577,58823,64566,65165,78963,81809,89830,114502,140588,171458,252833,266715,282581,289229,289392,290669,293992,296201,297867,298555,300128,301042,301346,303181,303811,303968,304495,306862,307594,307740,308739,309377,310552,311245,311860,312936,313757,361095,361096,361517,361700,361938,362736,362938,363544,363595,364712,367106,498328,500…	Rara,Sdc4,Foxa2,Nog,Nup50,Pax6,Prkaca,Rps7,Fgf8,Hif1a,Hes1,Nckap1,Wnt5a,Tmed2,Apaf1,Tgfb2,Ptch1,Pax3,Gli3,Ipmk,Gdf7,Fzd3,Fzd6,Vangl2,Plxna2,Gatad2a,Pax2,Ovol2,Arid1a,Grhl3,Celsr1,Trim71,Sema4c,Wnt3a,Dvl3,Ift57,Kdm2b,Tfap2a,Mib1,Sall1,Rgma,Sfrp5,Sfrp2,Traf6,Abl1,Sox17,Ski,Zic5,Zic2,Vasp,Kdm2a,Intu,Hectd1,Scrib,Cluap1,Tcf7,Sox4,Foxb1,Pkd2,Pax7,Tcf7l2,Mnx1,Phactr4,Gas1,Tbc1d32
1_Member	GO Biological Processes	GO:0001701	in utero embryonic development	-14.0323	-11.4281	110/436	24165,24170,24209,24252,24329,24517,24577,24628,24817,24851,25022,25099,25267,25478,25484,25495,25631,25640,29154,29203,29560,29577,54254,54284,58823,58976,60443,60584,64547,65165,66019,79433,81504,81519,81640,81810,83476,83611,83807,84399,84584,85471,89830,113984,114208,114487,114561,140588,161452,170818,170933,259270,282635,287662,287745,288615,290669,292721,293184,293637,296201,296302,297480,2…	Ada,Add1,Ascl2,Cebpa,Egfr,Junb,Myc,Pdgfb,Hnf1a,Tpm1,Fgfr2,Foxa2,Pdgfra,Man2a1,Myo1e,Nog,Smad3,Hnf1b,Capn2,Foxd3,Hif1a,Hes1,Gata4,Pitx2,Nckap1,Slc30a1,Epn2,Lif,Bcl2l11,Tmed2,Cdx2,Myh10,Grb2,Mgat1,Amd1,Tgfbr2,Cyr61,Apba3,Ybx3,Ihh,Ncoa3,Gata3,Ptch1,Nr2f2,Skil,Wnt2,Pitpnb,Gli3,Lef1,Icmt,Syf2,Zfp335,Mbnl1,Pcgf2,Plcd3,Sbds,Gatad2a,Erf,Ctr9,Phlda2,Ovol2,Eif2s2,Foxp1,G2e3,Wnt3a,Wnt9b,Polg2,Klf1,Tapt1,Lat…
1_Member	GO Biological Processes	GO:0001841	neural tube formation	-13.0644	-10.5705	48/128	24705,24771,25495,25497,25636,29258,29560,58823,64566,65165,78963,81809,89830,114502,171458,252833,266715,282581,289229,290669,293992,296201,297867,298555,300128,301042,301346,303811,303968,304495,306862,307594,307740,308739,309377,310552,311245,311860,313757,361095,361096,361517,361700,362736,362938,363544,364712,682920	Rara,Sdc4,Nog,Nup50,Prkaca,Rps7,Hif1a,Nckap1,Wnt5a,Tmed2,Apaf1,Tgfb2,Ptch1,Pax3,Ipmk,Gdf7,Fzd3,Fzd6,Vangl2,Gatad2a,Pax2,Ovol2,Arid1a,Grhl3,Celsr1,Trim71,Sema4c,Dvl3,Ift57,Kdm2b,Tfap2a,Mib1,Sall1,Rgma,Sfrp5,Sfrp2,Traf6,Abl1,Ski,Zic5,Zic2,Vasp,Kdm2a,Hectd1,Scrib,Cluap1,Sox4,Phactr4
1_Member	GO Biological Processes	GO:0048754	branching morphogenesis of an epithelial tube	-12.8456	-10.3876	60/185	24577,24883,25022,25099,25267,25495,25628,25640,25697,29349,29748,50566,54251,54284,64566,78965,81810,83629,83718,84017,84399,84584,89830,114487,114634,116466,140433,140588,161452,171293,171299,171356,252833,289229,290905,291936,293992,299138,300128,303586,304809,304947,306141,307740,310341,310552,311332,311860,314785,353252,353305,360635,360820,362280,497985,498328,500863,684233,686753,100361818	Myc,Wt1,Fgfr2,Foxa2,Pdgfra,Nog,Nkx2-1,Hnf1b,Ctsl,Fgf8,Ppp3r1,Grem1,Flt1,Pitx2,Wnt5a,Csf1,Tgfbr2,Slc12a2,Clic4,Hmga2,Ihh,Ncoa3,Ptch1,Wnt2,Six1,Wnt2b,Lama5,Gli3,Lef1,Ctsd,Foxd1,Foxc2,Gdf7,Vangl2,Col4a1,Hhip,Pax2,Six4,Celsr1,Wnt9b,Kdm5b,Pbx1,Spry2,Sall1,Fat4,Sfrp2,Dll4,Abl1,Tmtc3,Rdh10,Tbx3,Etv4,Pxn,Tfap2c,Hoxb7,Pkd2,Rspo2,Rbm15,Npnt,Nfatc1
1_Member	GO Biological Processes	GO:0001763	morphogenesis of a branching structure	-12.3086	-9.90256	70/240	24318,24577,24628,24883,25022,25099,25266,25267,25495,25546,25628,25640,25697,29349,29748,50566,54251,54284,64566,78965,81504,81810,83629,83718,84017,84399,84584,89830,114487,114634,116466,117282,140433,140588,161452,171287,171293,171299,171356,252833,288154,289229,290905,291936,293992,296499,299138,300128,303586,304809,304947,305589,306141,307740,310341,310552,311332,311860,314785,353252,353305,…	Drd2,Myc,Pdgfb,Wt1,Fgfr2,Foxa2,Pdgfa,Pdgfra,Nog,Shox2,Nkx2-1,Hnf1b,Ctsl,Fgf8,Ppp3r1,Grem1,Flt1,Pitx2,Wnt5a,Csf1,Grb2,Tgfbr2,Slc12a2,Clic4,Hmga2,Ihh,Ncoa3,Ptch1,Wnt2,Six1,Wnt2b,Hnrnpk,Lama5,Gli3,Lef1,Epha7,Ctsd,Foxd1,Foxc2,Gdf7,Hoxd13,Vangl2,Col4a1,Hhip,Pax2,Dlx2,Six4,Celsr1,Wnt9b,Kdm5b,Pbx1,Bcl11a,Spry2,Sall1,Fat4,Sfrp2,Dll4,Abl1,Tmtc3,Rdh10,Tbx3,Etv4,Pxn,Tfap2c,Hoxb7,Pkd2,Rspo2,Rbm15,Npnt,Nfatc1
1_Member	GO Biological Processes	GO:0014020	primary neural tube formation	-11.8776	-9.50109	43/114	24705,24771,25495,25636,29258,29560,58823,64566,65165,78963,81809,89830,114502,266715,282581,289229,290669,293992,296201,297867,298555,300128,301042,301346,303811,303968,304495,306862,307740,308739,309377,310552,311245,311860,313757,361095,361096,361517,361700,362736,362938,363544,682920	Rara,Sdc4,Nog,Prkaca,Rps7,Hif1a,Nckap1,Wnt5a,Tmed2,Apaf1,Tgfb2,Ptch1,Pax3,Fzd3,Fzd6,Vangl2,Gatad2a,Pax2,Ovol2,Arid1a,Grhl3,Celsr1,Trim71,Sema4c,Dvl3,Ift57,Kdm2b,Tfap2a,Sall1,Rgma,Sfrp5,Sfrp2,Traf6,Abl1,Ski,Zic5,Zic2,Vasp,Kdm2a,Hectd1,Scrib,Cluap1,Phactr4
1_Member	GO Biological Processes	GO:0001843	neural tube closure	-11.6187	-9.26448	41/107	24705,24771,25495,25636,29258,58823,64566,65165,78963,81809,89830,114502,266715,282581,289229,290669,293992,297867,298555,300128,301042,301346,303811,303968,304495,306862,307740,308739,309377,310552,311245,311860,313757,361095,361096,361517,361700,362736,362938,363544,682920	Rara,Sdc4,Nog,Prkaca,Rps7,Nckap1,Wnt5a,Tmed2,Apaf1,Tgfb2,Ptch1,Pax3,Fzd3,Fzd6,Vangl2,Gatad2a,Pax2,Arid1a,Grhl3,Celsr1,Trim71,Sema4c,Dvl3,Ift57,Kdm2b,Tfap2a,Sall1,Rgma,Sfrp5,Sfrp2,Traf6,Abl1,Ski,Zic5,Zic2,Vasp,Kdm2a,Hectd1,Scrib,Cluap1,Phactr4
1_Member	GO Biological Processes	GO:0060606	tube closure	-11.4643	-9.13633	41/108	24705,24771,25495,25636,29258,58823,64566,65165,78963,81809,89830,114502,266715,282581,289229,290669,293992,297867,298555,300128,301042,301346,303811,303968,304495,306862,307740,308739,309377,310552,311245,311860,313757,361095,361096,361517,361700,362736,362938,363544,682920	Rara,Sdc4,Nog,Prkaca,Rps7,Nckap1,Wnt5a,Tmed2,Apaf1,Tgfb2,Ptch1,Pax3,Fzd3,Fzd6,Vangl2,Gatad2a,Pax2,Arid1a,Grhl3,Celsr1,Trim71,Sema4c,Dvl3,Ift57,Kdm2b,Tfap2a,Sall1,Rgma,Sfrp5,Sfrp2,Traf6,Abl1,Ski,Zic5,Zic2,Vasp,Kdm2a,Hectd1,Scrib,Cluap1,Phactr4
1_Member	GO Biological Processes	GO:2000027	regulation of animal organ morphogenesis	-11.2141	-8.911	60/200	24225,24577,24883,25022,25266,25267,25495,25640,29227,29349,29577,50566,60584,64566,78965,81809,81810,83466,84017,85471,114487,114634,116466,140584,171356,266715,282581,288154,289229,293976,293992,298555,299138,300128,303181,303586,303811,304514,306782,306862,307740,308766,309377,310552,311642,311860,312936,313713,315196,317346,360635,360737,362741,363026,364706,364952,497985,499443,500863,679028	Bdnf,Myc,Wt1,Fgfr2,Pdgfa,Pdgfra,Nog,Hnf1b,Nfib,Fgf8,Hes1,Grem1,Lif,Wnt5a,Csf1,Tgfb2,Tgfbr2,Celsr3,Hmga2,Gata3,Wnt2,Six1,Wnt2b,Wnt11,Foxc2,Fzd3,Fzd6,Hoxd13,Vangl2,Dmrt3,Pax2,Grhl3,Six4,Celsr1,Wnt3a,Wnt9b,Dvl3,Tbx5,Ror2,Tfap2a,Sall1,Mesp1,Sfrp5,Sfrp2,Sulf2,Abl1,Sox17,Casz1,Wnt7b,Bcor,Etv4,Tbx1,Pax9,Carm1,Foxc1,Nkd1,Hoxb7,Lims1,Rspo2,Rbpj
1_Member	GO Biological Processes	GO:0061138	morphogenesis of a branching epithelium	-11.0679	-8.7883	64/222	24577,24628,24883,25022,25099,25266,25267,25495,25628,25640,25697,29349,29748,50566,54251,54284,64566,78965,81504,81810,83629,83718,84017,84399,84584,89830,114487,114634,116466,140433,140588,161452,171293,171299,171356,252833,288154,289229,290905,291936,293992,299138,300128,303586,304809,304947,306141,307740,310341,310552,311332,311860,314785,353252,353305,360635,360820,362280,497985,498328,50086…	Myc,Pdgfb,Wt1,Fgfr2,Foxa2,Pdgfa,Pdgfra,Nog,Nkx2-1,Hnf1b,Ctsl,Fgf8,Ppp3r1,Grem1,Flt1,Pitx2,Wnt5a,Csf1,Grb2,Tgfbr2,Slc12a2,Clic4,Hmga2,Ihh,Ncoa3,Ptch1,Wnt2,Six1,Wnt2b,Lama5,Gli3,Lef1,Ctsd,Foxd1,Foxc2,Gdf7,Hoxd13,Vangl2,Col4a1,Hhip,Pax2,Six4,Celsr1,Wnt9b,Kdm5b,Pbx1,Spry2,Sall1,Fat4,Sfrp2,Dll4,Abl1,Tmtc3,Rdh10,Tbx3,Etv4,Pxn,Tfap2c,Hoxb7,Pkd2,Rspo2,Rbm15,Npnt,Nfatc1
1_Member	GO Biological Processes	GO:1905330	regulation of morphogenesis of an epithelium	-8.80864	-6.69743	37/109	25022,25266,25267,25495,25640,50566,56718,60584,64566,83466,85471,114487,114634,116466,140584,266715,282581,288154,289229,293992,297480,298555,299138,300128,303586,303811,304740,306782,306873,307740,309377,310552,311860,315196,360635,364952,497985	Fgfr2,Pdgfa,Pdgfra,Nog,Hnf1b,Grem1,Mtor,Lif,Wnt5a,Celsr3,Gata3,Wnt2,Six1,Wnt2b,Wnt11,Fzd3,Fzd6,Hoxd13,Vangl2,Pax2,Foxp1,Grhl3,Six4,Celsr1,Wnt9b,Dvl3,Clasp1,Ror2,Rreb1,Sall1,Sfrp5,Sfrp2,Abl1,Wnt7b,Etv4,Nkd1,Hoxb7
2_Summary	GO Biological Processes	GO:0007423	sensory organ development	-22.4763	-19.1221	164/627	24166,24225,24252,24329,24337,24388,24400,24419,24516,24577,24628,24705,24771,24874,24883,24919,25022,25266,25267,25444,25478,25495,25509,25631,25744,29146,29232,29349,29496,29553,29560,29577,29598,29609,29616,54251,54264,54267,54284,58853,59114,60584,60661,64547,64566,64571,79433,81809,81810,81822,83718,83720,83727,84010,84399,84489,84577,85425,85471,85490,114208,114213,114494,114523,114634,1166…	Adcyap1,Bdnf,Cebpa,Egfr,Erbb2,Gfi1,Gnb1,Grm6,Jun,Myc,Pdgfb,Rara,Sdc4,Vhl,Wt1,Yy1,Fgfr2,Pdgfa,Pdgfra,Fgf9,Man2a1,Nog,Pax6,Smad3,Nf2,Jag1,Clcn2,Fgf8,Erbb3,Kcnk3,Hif1a,Hes1,Atp2b1,Pitx3,Ptprm,Flt1,Mafb,Maf,Pitx2,Nr4a3,Slc9a3r1,Lif,Max,Bcl2l11,Wnt5a,Vax1,Myh10,Tgfb2,Tgfbr2,Actb,Clic4,Fat1,Fbn1,Dll1,Ihh,Fgfr3,Hdac2,Tdrd7,Gata3,Col5a1,Skil,Rax,Ccna2,Ntn1,Six1,Cux1,Hnrnpk,Slc4a7,Gli3,Lef1,Lhx3,Anp32b,Po…
2_Member	GO Biological Processes	GO:0007423	sensory organ development	-22.4763	-19.1221	164/627	24166,24225,24252,24329,24337,24388,24400,24419,24516,24577,24628,24705,24771,24874,24883,24919,25022,25266,25267,25444,25478,25495,25509,25631,25744,29146,29232,29349,29496,29553,29560,29577,29598,29609,29616,54251,54264,54267,54284,58853,59114,60584,60661,64547,64566,64571,79433,81809,81810,81822,83718,83720,83727,84010,84399,84489,84577,85425,85471,85490,114208,114213,114494,114523,114634,1166…	Adcyap1,Bdnf,Cebpa,Egfr,Erbb2,Gfi1,Gnb1,Grm6,Jun,Myc,Pdgfb,Rara,Sdc4,Vhl,Wt1,Yy1,Fgfr2,Pdgfa,Pdgfra,Fgf9,Man2a1,Nog,Pax6,Smad3,Nf2,Jag1,Clcn2,Fgf8,Erbb3,Kcnk3,Hif1a,Hes1,Atp2b1,Pitx3,Ptprm,Flt1,Mafb,Maf,Pitx2,Nr4a3,Slc9a3r1,Lif,Max,Bcl2l11,Wnt5a,Vax1,Myh10,Tgfb2,Tgfbr2,Actb,Clic4,Fat1,Fbn1,Dll1,Ihh,Fgfr3,Hdac2,Tdrd7,Gata3,Col5a1,Skil,Rax,Ccna2,Ntn1,Six1,Cux1,Hnrnpk,Slc4a7,Gli3,Lef1,Lhx3,Anp32b,Po…
2_Member	GO Biological Processes	GO:0090596	sensory organ morphogenesis	-14.6705	-12.0152	86/298	24225,24388,24577,24628,24874,24919,25022,25444,25478,25495,25509,29146,29349,29560,29609,29616,54251,54264,54284,58853,59114,64566,83720,83727,84010,84399,84489,84577,85425,85471,85490,114523,114634,117955,140588,191571,192183,266715,282581,288124,288736,289229,292172,293537,293538,293992,297867,297893,298496,298555,298878,299138,300128,301285,303181,303811,304495,305501,306141,306238,306782,306…	Bdnf,Gfi1,Myc,Pdgfb,Vhl,Yy1,Fgfr2,Fgf9,Man2a1,Nog,Pax6,Jag1,Fgf8,Hif1a,Pitx3,Ptprm,Flt1,Mafb,Pitx2,Nr4a3,Slc9a3r1,Wnt5a,Fat1,Fbn1,Dll1,Ihh,Fgfr3,Hdac2,Tdrd7,Gata3,Col5a1,Ntn1,Six1,Slc4a7,Gli3,Fat3,Nectin1,Fzd3,Fzd6,Nectin3,Foxn4,Vangl2,Eya4,Hmx3,Hmx2,Pax2,Arid1a,Hdac1,Kcnq4,Grhl3,Osr1,Six4,Celsr1,Tfap2b,Wnt3a,Dvl3,Kdm2b,Ikzf1,Spry2,Ccdc66,Ror2,Tfap2a,Ripor2,Sall1,Sobp,Cyp26b1,Chd7,Whrn,Ephb2,Casz…
2_Member	GO Biological Processes	GO:0043010	camera-type eye development	-13.8225	-11.2464	96/361	24166,24329,24400,24419,24516,24628,24705,24874,24883,24919,25022,25267,25478,25509,25631,25744,29146,29232,29560,29598,29609,29616,54251,54267,54284,60584,60661,64571,79433,81809,81810,81822,83718,83720,83727,84010,84399,84489,84577,85425,85471,114208,114213,117282,117955,140588,171355,171356,191571,192183,246294,246771,288124,288736,290905,291960,293992,296499,297867,297893,298555,301285,304495…	Adcyap1,Egfr,Gnb1,Grm6,Jun,Pdgfb,Rara,Vhl,Wt1,Yy1,Fgfr2,Pdgfra,Man2a1,Pax6,Smad3,Nf2,Jag1,Clcn2,Hif1a,Atp2b1,Pitx3,Ptprm,Flt1,Maf,Pitx2,Lif,Max,Vax1,Myh10,Tgfb2,Tgfbr2,Actb,Clic4,Fat1,Fbn1,Dll1,Ihh,Fgfr3,Hdac2,Tdrd7,Gata3,Skil,Rax,Hnrnpk,Slc4a7,Gli3,Pou4f2,Foxc2,Fat3,Nectin1,Optn,Slc25a25,Nectin3,Foxn4,Col4a1,Hsf4,Pax2,Dlx2,Arid1a,Hdac1,Grhl3,Tfap2b,Kdm2b,Kdm5b,Ikzf1,Ccdc66,Tfap2a,Celf4,Six5,Dll4…
2_Member	GO Biological Processes	GO:0001654	eye development	-13.8038	-11.2455	105/411	24166,24225,24329,24400,24419,24516,24628,24705,24874,24883,24919,25022,25267,25444,25478,25509,25631,25744,29146,29232,29560,29598,29609,29616,54251,54267,54284,60584,60661,64571,79433,81809,81810,81822,83718,83720,83727,84010,84399,84489,84577,85425,85471,85490,114208,114213,117282,117955,140588,171355,171356,191571,192183,246294,246771,288124,288736,290905,291960,293992,296499,297867,297893,29…	Adcyap1,Bdnf,Egfr,Gnb1,Grm6,Jun,Pdgfb,Rara,Vhl,Wt1,Yy1,Fgfr2,Pdgfra,Fgf9,Man2a1,Pax6,Smad3,Nf2,Jag1,Clcn2,Hif1a,Atp2b1,Pitx3,Ptprm,Flt1,Maf,Pitx2,Lif,Max,Vax1,Myh10,Tgfb2,Tgfbr2,Actb,Clic4,Fat1,Fbn1,Dll1,Ihh,Fgfr3,Hdac2,Tdrd7,Gata3,Col5a1,Skil,Rax,Hnrnpk,Slc4a7,Gli3,Pou4f2,Foxc2,Fat3,Nectin1,Optn,Slc25a25,Nectin3,Foxn4,Col4a1,Hsf4,Pax2,Dlx2,Arid1a,Hdac1,Grhl3,Tfap2b,Kdm2b,Kdm5b,Ikzf1,Ccdc66,Tfap2…
2_Member	GO Biological Processes	GO:0150063	visual system development	-13.8038	-11.2455	105/411	24166,24225,24329,24400,24419,24516,24628,24705,24874,24883,24919,25022,25267,25444,25478,25509,25631,25744,29146,29232,29560,29598,29609,29616,54251,54267,54284,60584,60661,64571,79433,81809,81810,81822,83718,83720,83727,84010,84399,84489,84577,85425,85471,85490,114208,114213,117282,117955,140588,171355,171356,191571,192183,246294,246771,288124,288736,290905,291960,293992,296499,297867,297893,29…	Adcyap1,Bdnf,Egfr,Gnb1,Grm6,Jun,Pdgfb,Rara,Vhl,Wt1,Yy1,Fgfr2,Pdgfra,Fgf9,Man2a1,Pax6,Smad3,Nf2,Jag1,Clcn2,Hif1a,Atp2b1,Pitx3,Ptprm,Flt1,Maf,Pitx2,Lif,Max,Vax1,Myh10,Tgfb2,Tgfbr2,Actb,Clic4,Fat1,Fbn1,Dll1,Ihh,Fgfr3,Hdac2,Tdrd7,Gata3,Col5a1,Skil,Rax,Hnrnpk,Slc4a7,Gli3,Pou4f2,Foxc2,Fat3,Nectin1,Optn,Slc25a25,Nectin3,Foxn4,Col4a1,Hsf4,Pax2,Dlx2,Arid1a,Hdac1,Grhl3,Tfap2b,Kdm2b,Kdm5b,Ikzf1,Ccdc66,Tfap2…
2_Member	GO Biological Processes	GO:0048880	sensory system development	-13.5071	-10.9657	105/415	24166,24225,24329,24400,24419,24516,24628,24705,24874,24883,24919,25022,25267,25444,25478,25509,25631,25744,29146,29232,29560,29598,29609,29616,54251,54267,54284,60584,60661,64571,79433,81809,81810,81822,83718,83720,83727,84010,84399,84489,84577,85425,85471,85490,114208,114213,117282,117955,140588,171355,171356,191571,192183,246294,246771,288124,288736,290905,291960,293992,296499,297867,297893,29…	Adcyap1,Bdnf,Egfr,Gnb1,Grm6,Jun,Pdgfb,Rara,Vhl,Wt1,Yy1,Fgfr2,Pdgfra,Fgf9,Man2a1,Pax6,Smad3,Nf2,Jag1,Clcn2,Hif1a,Atp2b1,Pitx3,Ptprm,Flt1,Maf,Pitx2,Lif,Max,Vax1,Myh10,Tgfb2,Tgfbr2,Actb,Clic4,Fat1,Fbn1,Dll1,Ihh,Fgfr3,Hdac2,Tdrd7,Gata3,Col5a1,Skil,Rax,Hnrnpk,Slc4a7,Gli3,Pou4f2,Foxc2,Fat3,Nectin1,Optn,Slc25a25,Nectin3,Foxn4,Col4a1,Hsf4,Pax2,Dlx2,Arid1a,Hdac1,Grhl3,Tfap2b,Kdm2b,Kdm5b,Ikzf1,Ccdc66,Tfap2…
2_Member	GO Biological Processes	GO:0048593	camera-type eye morphogenesis	-7.53103	-5.56149	38/125	24874,24919,25478,25509,29146,29560,29609,29616,54251,54284,83720,84010,84399,84489,85425,117955,140588,191571,192183,288124,288736,293992,297867,301285,304495,305501,306238,306862,313633,313713,313757,360652,365895,366140,498918,682920,686117,691517	Vhl,Yy1,Man2a1,Pax6,Jag1,Hif1a,Pitx3,Ptprm,Flt1,Pitx2,Fat1,Dll1,Ihh,Fgfr3,Tdrd7,Slc4a7,Gli3,Fat3,Nectin1,Nectin3,Foxn4,Pax2,Arid1a,Tfap2b,Kdm2b,Ikzf1,Ccdc66,Tfap2a,Ephb2,Casz1,Ski,Sdk2,Hipk1,Fjx1,Irx5,Phactr4,Meis1,Megf11
2_Member	GO Biological Processes	GO:0060041	retina development in camera-type eye	-7.05315	-5.14411	48/183	24400,24419,24628,25267,25478,25509,29232,29560,29598,29616,60584,60661,79433,81809,81822,83718,84010,84399,117955,171355,191571,192183,246294,288124,288736,290905,293992,296499,301285,305501,306238,306862,307540,311332,312974,313713,313757,360652,360665,362229,365564,365895,366140,498918,499929,684085,691517,100359595	Gnb1,Grm6,Pdgfb,Pdgfra,Man2a1,Pax6,Clcn2,Hif1a,Atp2b1,Ptprm,Lif,Max,Myh10,Tgfb2,Actb,Clic4,Dll1,Ihh,Slc4a7,Pou4f2,Fat3,Nectin1,Optn,Nectin3,Foxn4,Col4a1,Pax2,Dlx2,Tfap2b,Ikzf1,Ccdc66,Tfap2a,Celf4,Dll4,Chd7,Casz1,Ski,Sdk2,Jmjd6,Xrn2,Atoh7,Hipk1,Fjx1,Irx5,Tgif2,Nr2e1,Megf11,Tbc1d32
2_Member	GO Biological Processes	GO:0048592	eye morphogenesis	-6.70017	-4.84766	45/171	24225,24628,24874,24919,25478,25509,29146,29560,29609,29616,54251,54284,83720,83727,84010,84399,84489,85425,85490,117955,140588,191571,192183,288124,288736,293992,297867,301285,304495,305501,306238,306862,313633,313713,313757,360630,360652,365895,366140,367152,498918,682920,683470,686117,691517	Bdnf,Pdgfb,Vhl,Yy1,Man2a1,Pax6,Jag1,Hif1a,Pitx3,Ptprm,Flt1,Pitx2,Fat1,Fbn1,Dll1,Ihh,Fgfr3,Tdrd7,Col5a1,Slc4a7,Gli3,Fat3,Nectin1,Nectin3,Foxn4,Pax2,Arid1a,Tfap2b,Kdm2b,Ikzf1,Ccdc66,Tfap2a,Ephb2,Casz1,Ski,Naglu,Sdk2,Hipk1,Fjx1,Foxl2,Irx5,Phactr4,Gas1,Meis1,Megf11
2_Member	GO Biological Processes	GO:0003407	neural retina development	-4.06348	-2.55355	21/73	29598,29616,81809,84399,117955,171355,191571,246294,288736,296499,301285,305501,306862,311332,313713,360652,365564,365895,366140,498918,691517	Atp2b1,Ptprm,Tgfb2,Ihh,Slc4a7,Pou4f2,Fat3,Optn,Foxn4,Dlx2,Tfap2b,Ikzf1,Tfap2a,Dll4,Casz1,Sdk2,Atoh7,Hipk1,Fjx1,Irx5,Megf11
2_Member	GO Biological Processes	GO:0060042	retina morphogenesis in camera-type eye	-3.92582	-2.44663	18/59	25478,29616,84010,84399,117955,191571,288124,288736,301285,305501,306238,306862,313713,360652,365895,366140,498918,691517	Man2a1,Ptprm,Dll1,Ihh,Slc4a7,Fat3,Nectin3,Foxn4,Tfap2b,Ikzf1,Ccdc66,Tfap2a,Casz1,Sdk2,Hipk1,Fjx1,Irx5,Megf11
2_Member	GO Biological Processes	GO:0010842	retina layer formation	-3.2463	-1.91065	9/22	29616,191571,288736,301285,306862,360652,365895,366140,691517	Ptprm,Fat3,Foxn4,Tfap2b,Tfap2a,Sdk2,Hipk1,Fjx1,Megf11
3_Summary	GO Biological Processes	GO:0007389	pattern specification process	-22.0352	-18.7321	134/470	24373,24883,24919,25022,25099,25495,25509,25628,25631,25636,25640,29349,29375,29560,29577,29619,50566,50594,54254,54264,54284,58823,59323,59328,64566,64618,64865,65165,65193,66019,81527,81810,84010,84399,89830,113984,114029,114109,114213,114487,114502,114634,116466,117095,140588,154985,161452,170671,170905,170915,171299,171356,192117,287647,287662,287867,288153,288154,288239,288736,289229,289392,…	Fst,Wt1,Yy1,Fgfr2,Foxa2,Nog,Pax6,Nkx2-1,Smad3,Prkaca,Hnf1b,Fgf8,Uncx,Hif1a,Hes1,Btg2,Grem1,Nbl1,Gata4,Mafb,Pitx2,Nckap1,Erbb4,Smad5,Wnt5a,Zic1,Pcdh8,Tmed2,Nkx6-1,Cdx2,Nrp2,Tgfbr2,Dll1,Ihh,Ptch1,Nr2f2,Megf8,Nkx2-5,Rax,Wnt2,Pax3,Six1,Wnt2b,Bhlhe41,Gli3,Cyp26a1,Lef1,Lhx3,Lfng,Ep300,Foxd1,Foxc2,Syngap1,Hoxb9,Pcgf2,Ccdc40,Hoxd4,Hoxd13,Ripply3,Foxn4,Vangl2,Plxna2,Hhip,Dbx1,Dmrt3,Pax2,Ttc21b,Ovol2,Tcf15…
3_Member	GO Biological Processes	GO:0007389	pattern specification process	-22.0352	-18.7321	134/470	24373,24883,24919,25022,25099,25495,25509,25628,25631,25636,25640,29349,29375,29560,29577,29619,50566,50594,54254,54264,54284,58823,59323,59328,64566,64618,64865,65165,65193,66019,81527,81810,84010,84399,89830,113984,114029,114109,114213,114487,114502,114634,116466,117095,140588,154985,161452,170671,170905,170915,171299,171356,192117,287647,287662,287867,288153,288154,288239,288736,289229,289392,…	Fst,Wt1,Yy1,Fgfr2,Foxa2,Nog,Pax6,Nkx2-1,Smad3,Prkaca,Hnf1b,Fgf8,Uncx,Hif1a,Hes1,Btg2,Grem1,Nbl1,Gata4,Mafb,Pitx2,Nckap1,Erbb4,Smad5,Wnt5a,Zic1,Pcdh8,Tmed2,Nkx6-1,Cdx2,Nrp2,Tgfbr2,Dll1,Ihh,Ptch1,Nr2f2,Megf8,Nkx2-5,Rax,Wnt2,Pax3,Six1,Wnt2b,Bhlhe41,Gli3,Cyp26a1,Lef1,Lhx3,Lfng,Ep300,Foxd1,Foxc2,Syngap1,Hoxb9,Pcgf2,Ccdc40,Hoxd4,Hoxd13,Ripply3,Foxn4,Vangl2,Plxna2,Hhip,Dbx1,Dmrt3,Pax2,Ttc21b,Ovol2,Tcf15…
3_Member	GO Biological Processes	GO:0003002	regionalization	-18.3906	-15.3094	108/373	24883,24919,25022,25099,25495,25509,25628,25631,25636,25640,29349,29577,29619,50566,50594,54254,54264,54284,58823,64566,64865,65165,65193,66019,81527,84010,89830,113984,114029,114109,114487,114502,114634,116466,117095,140588,154985,161452,170671,170905,170915,171299,171356,287647,287662,288153,288154,288736,289229,289392,291936,292934,293976,293992,295654,296201,296272,296499,296511,298878,299499…	Wt1,Yy1,Fgfr2,Foxa2,Nog,Pax6,Nkx2-1,Smad3,Prkaca,Hnf1b,Fgf8,Hes1,Btg2,Grem1,Nbl1,Gata4,Mafb,Pitx2,Nckap1,Wnt5a,Pcdh8,Tmed2,Nkx6-1,Cdx2,Nrp2,Dll1,Ptch1,Nr2f2,Megf8,Nkx2-5,Wnt2,Pax3,Six1,Wnt2b,Bhlhe41,Gli3,Cyp26a1,Lef1,Lhx3,Lfng,Ep300,Foxd1,Foxc2,Hoxb9,Pcgf2,Hoxd4,Hoxd13,Foxn4,Vangl2,Plxna2,Hhip,Dbx1,Dmrt3,Pax2,Ttc21b,Ovol2,Tcf15,Dlx2,Alx4,Osr1,Sp8,Celsr1,Wnt3a,Ift57,Kdm2b,Pbx1,Fezf2,Irx1,Ror2,Mib1…
3_Member	GO Biological Processes	GO:0009952	anterior/posterior pattern specification	-11.1993	-8.90103	66/231	24883,24919,25099,25495,25509,25631,25640,29349,29577,29619,54254,58823,64566,64865,65165,66019,84010,113984,114487,114502,116466,117095,140588,154985,161452,170905,170915,171356,287647,287662,288153,288154,289229,289392,296272,296511,298878,300128,303181,304495,304947,305719,306782,307594,308766,309430,310552,311505,312451,312936,313757,315606,315870,316626,353305,360737,363111,364706,365895,367…	Wt1,Yy1,Foxa2,Nog,Pax6,Smad3,Hnf1b,Fgf8,Hes1,Btg2,Gata4,Nckap1,Wnt5a,Pcdh8,Tmed2,Cdx2,Dll1,Nr2f2,Wnt2,Pax3,Wnt2b,Bhlhe41,Gli3,Cyp26a1,Lef1,Lfng,Ep300,Foxc2,Hoxb9,Pcgf2,Hoxd4,Hoxd13,Vangl2,Plxna2,Tcf15,Alx4,Osr1,Celsr1,Wnt3a,Kdm2b,Pbx1,Fezf2,Ror2,Mib1,Mesp1,Dmrt2,Sfrp2,Pax1,Tcf7l1,Sox17,Ski,Kmt2a,Tbx18,Hes6,Tbx3,Tbx1,Ripply2,Foxc1,Hipk1,Foxb1,Hoxb7,Rbpj,Hoxd9,Hoxb2,LOC100911248,Hoxa3
3_Member	GO Biological Processes	GO:0061053	somite development	-9.74556	-7.54891	37/102	25099,25495,25631,29577,58823,64566,64865,65165,66019,84010,84399,89830,114502,114634,117095,140584,161452,170905,170915,171356,289392,296272,299138,303181,306782,307594,308766,308968,309430,310552,311505,315870,316626,363111,364706,367106,679028	Foxa2,Nog,Smad3,Hes1,Nckap1,Wnt5a,Pcdh8,Tmed2,Cdx2,Dll1,Ihh,Ptch1,Pax3,Six1,Bhlhe41,Wnt11,Lef1,Lfng,Ep300,Foxc2,Plxna2,Tcf15,Six4,Wnt3a,Ror2,Mib1,Mesp1,Rbbp6,Dmrt2,Sfrp2,Pax1,Tbx18,Hes6,Ripply2,Foxc1,Foxb1,Rbpj
3_Member	GO Biological Processes	GO:0035282	segmentation	-9.40886	-7.2307	38/109	24883,25099,25631,29577,54264,58823,64566,64865,65165,66019,81527,84010,114502,117095,161452,170905,170915,171356,289392,296272,298878,303181,306659,306782,307594,308766,309430,310552,311505,312451,315870,316626,353305,360905,363111,364706,367106,679028	Wt1,Foxa2,Smad3,Hes1,Mafb,Nckap1,Wnt5a,Pcdh8,Tmed2,Cdx2,Nrp2,Dll1,Pax3,Bhlhe41,Lef1,Lfng,Ep300,Foxc2,Plxna2,Tcf15,Osr1,Wnt3a,Irx1,Ror2,Mib1,Mesp1,Dmrt2,Sfrp2,Pax1,Tcf7l1,Tbx18,Hes6,Tbx3,Mtf2,Ripply2,Foxc1,Foxb1,Rbpj
3_Member	GO Biological Processes	GO:0001756	somitogenesis	-7.98988	-5.97058	30/83	25099,25631,29577,58823,64566,64865,65165,66019,84010,114502,117095,161452,170905,170915,171356,289392,296272,303181,306782,307594,308766,309430,310552,311505,315870,316626,363111,364706,367106,679028	Foxa2,Smad3,Hes1,Nckap1,Wnt5a,Pcdh8,Tmed2,Cdx2,Dll1,Pax3,Bhlhe41,Lef1,Lfng,Ep300,Foxc2,Plxna2,Tcf15,Wnt3a,Ror2,Mib1,Mesp1,Dmrt2,Sfrp2,Pax1,Tbx18,Hes6,Ripply2,Foxc1,Foxb1,Rbpj
4_Summary	GO Biological Processes	GO:0045596	negative regulation of cell differentiation	-20.7483	-17.491	182/753	24166,24209,24225,24329,24337,24373,24388,24508,24577,24628,24672,24674,24695,24705,24874,24929,25084,25099,25164,25414,25415,25418,25495,25509,25513,25529,25576,25585,25628,25631,25664,29141,29146,29338,29497,29577,29609,29657,50566,54264,58919,59323,64031,64532,64566,64571,65193,66026,78969,79121,79426,81516,81809,83576,83619,83727,83838,84010,84017,84399,84482,84489,84577,84584,84609,85471,854…	Adcyap1,Ascl2,Bdnf,Egfr,Erbb2,Fst,Gfi1,Irf1,Myc,Pdgfb,Ppp2ca,Ppp3ca,Pthlh,Rara,Vhl,Ptger3,Il4r,Foxa2,Cdkn2b,Bcar1,Crmp1,Dpysl3,Nog,Pax6,Pik3r1,Ptprs,Ywhah,Id3,Nkx2-1,Smad3,Pparg,Gal,Jag1,Prdx2,Ptbp1,Hes1,Pitx3,Arntl,Grem1,Mafb,Ccnd1,Erbb4,Pdcd4,Adcy5,Wnt5a,Vax1,Nkx6-1,Trpv4,Trib1,Arf6,Zfp36,Smad7,Tgfb2,Sort1,Nfe2l2,Fbn1,Ltbp3,Dll1,Hmga2,Ihh,Foxo1,Fgfr3,Hdac2,Ncoa3,Sema6b,Gata3,Col5a1,Enpp1,Ptch1,…
4_Member	GO Biological Processes	GO:0045596	negative regulation of cell differentiation	-20.7483	-17.491	182/753	24166,24209,24225,24329,24337,24373,24388,24508,24577,24628,24672,24674,24695,24705,24874,24929,25084,25099,25164,25414,25415,25418,25495,25509,25513,25529,25576,25585,25628,25631,25664,29141,29146,29338,29497,29577,29609,29657,50566,54264,58919,59323,64031,64532,64566,64571,65193,66026,78969,79121,79426,81516,81809,83576,83619,83727,83838,84010,84017,84399,84482,84489,84577,84584,84609,85471,854…	Adcyap1,Ascl2,Bdnf,Egfr,Erbb2,Fst,Gfi1,Irf1,Myc,Pdgfb,Ppp2ca,Ppp3ca,Pthlh,Rara,Vhl,Ptger3,Il4r,Foxa2,Cdkn2b,Bcar1,Crmp1,Dpysl3,Nog,Pax6,Pik3r1,Ptprs,Ywhah,Id3,Nkx2-1,Smad3,Pparg,Gal,Jag1,Prdx2,Ptbp1,Hes1,Pitx3,Arntl,Grem1,Mafb,Ccnd1,Erbb4,Pdcd4,Adcy5,Wnt5a,Vax1,Nkx6-1,Trpv4,Trib1,Arf6,Zfp36,Smad7,Tgfb2,Sort1,Nfe2l2,Fbn1,Ltbp3,Dll1,Hmga2,Ihh,Foxo1,Fgfr3,Hdac2,Ncoa3,Sema6b,Gata3,Col5a1,Enpp1,Ptch1,…
4_Member	GO Biological Processes	GO:0010721	negative regulation of cell development	-12.8811	-10.4091	96/373	24166,24209,24225,24388,24674,24929,25099,25164,25414,25415,25418,25495,25509,25529,25576,25585,29141,29146,29577,29609,59323,64532,64566,64571,65193,66026,79121,83727,84010,84017,84489,84577,84609,93667,113912,114523,114593,116564,116671,116683,116744,117045,140588,171287,171355,171357,191571,192117,266611,287534,291023,291414,292820,294515,296499,297480,301346,303181,303206,303901,304017,304947…	Adcyap1,Ascl2,Bdnf,Gfi1,Ppp3ca,Ptger3,Foxa2,Cdkn2b,Bcar1,Crmp1,Dpysl3,Nog,Pax6,Ptprs,Ywhah,Id3,Gal,Jag1,Hes1,Pitx3,Erbb4,Adcy5,Wnt5a,Vax1,Nkx6-1,Trpv4,Arf6,Fbn1,Dll1,Hmga2,Fgfr3,Hdac2,Sema6b,Olfm1,Rtn4r,Ntn1,Nppc,Npr2,Cdk5r1,Efna5,Lpar1,Eif4e,Gli3,Epha7,Pou4f2,Ptprg,Fat3,Syngap1,Ptpn9,Rflnb,Id4,Ctdp1,Zfp536,Foxo3,Dlx2,Foxp1,Sema4c,Wnt3a,Ulk2,Sema5b,Tomm70,Pbx1,Bcl11a,Fezf2,Hook3,S1pr3,Mib1,Rgma,D…
4_Member	GO Biological Processes	GO:0050768	negative regulation of neurogenesis	-11.3036	-8.9858	84/327	24166,24209,24225,24388,24674,24929,25099,25164,25415,25418,25495,25509,25529,25576,25585,29146,29577,29609,59323,64532,64566,64571,65193,66026,79121,84010,84017,84489,84577,84609,93667,113912,114523,116671,116744,117045,140588,171287,171355,171357,191571,192117,266611,291023,292820,294515,296499,301346,303181,303206,303901,304947,305589,305719,306548,307594,308739,308942,309095,310533,310635,311…	Adcyap1,Ascl2,Bdnf,Gfi1,Ppp3ca,Ptger3,Foxa2,Cdkn2b,Crmp1,Dpysl3,Nog,Pax6,Ptprs,Ywhah,Id3,Jag1,Hes1,Pitx3,Erbb4,Adcy5,Wnt5a,Vax1,Nkx6-1,Trpv4,Arf6,Dll1,Hmga2,Fgfr3,Hdac2,Sema6b,Olfm1,Rtn4r,Ntn1,Cdk5r1,Lpar1,Eif4e,Gli3,Epha7,Pou4f2,Ptprg,Fat3,Syngap1,Ptpn9,Id4,Zfp536,Foxo3,Dlx2,Sema4c,Wnt3a,Ulk2,Sema5b,Pbx1,Bcl11a,Fezf2,Hook3,Mib1,Rgma,Dennd5a,Nkx6-2,Rapgef2,Arhgef2,Rtn4rl2,Ephb2,Casz1,Ski,Mdm2,Zhx…
4_Member	GO Biological Processes	GO:0051961	negative regulation of nervous system development	-11.2608	-8.94797	88/350	24166,24209,24225,24388,24674,24929,25099,25164,25415,25418,25495,25509,25529,25576,25585,25636,29146,29577,29609,54276,59323,64532,64566,64571,65193,66026,79121,84010,84017,84489,84577,84609,93667,113912,114523,116671,116744,117045,117282,140588,171287,171355,171357,191571,192117,266611,291023,292820,294515,296499,301346,303181,303206,303901,304947,305589,305719,306548,307594,308739,308942,30909…	Adcyap1,Ascl2,Bdnf,Gfi1,Ppp3ca,Ptger3,Foxa2,Cdkn2b,Crmp1,Dpysl3,Nog,Pax6,Ptprs,Ywhah,Id3,Prkaca,Jag1,Hes1,Pitx3,Neurod2,Erbb4,Adcy5,Wnt5a,Vax1,Nkx6-1,Trpv4,Arf6,Dll1,Hmga2,Fgfr3,Hdac2,Sema6b,Olfm1,Rtn4r,Ntn1,Cdk5r1,Lpar1,Eif4e,Hnrnpk,Gli3,Epha7,Pou4f2,Ptprg,Fat3,Syngap1,Ptpn9,Id4,Zfp536,Foxo3,Dlx2,Sema4c,Wnt3a,Ulk2,Sema5b,Pbx1,Bcl11a,Fezf2,Hook3,Mib1,Rgma,Dennd5a,Nkx6-2,Rapgef2,Tlr2,Arhgef2,Rtn4r…
4_Member	GO Biological Processes	GO:0045665	negative regulation of neuron differentiation	-7.47823	-5.5131	62/256	24388,24674,24929,25099,25415,25418,25509,25529,25576,25585,29146,29577,64532,64566,66026,79121,84010,84577,84609,113912,114523,116671,116744,117045,140588,171287,171355,171357,191571,192117,266611,291023,292820,294515,296499,301346,303181,303206,303901,304947,305589,305719,307594,308739,308942,310533,311169,313633,313713,314856,314988,316539,363026,363062,366214,497881,499362,500988,679028,68408…	Gfi1,Ppp3ca,Ptger3,Foxa2,Crmp1,Dpysl3,Pax6,Ptprs,Ywhah,Id3,Jag1,Hes1,Adcy5,Wnt5a,Trpv4,Arf6,Dll1,Hdac2,Sema6b,Rtn4r,Ntn1,Cdk5r1,Lpar1,Eif4e,Gli3,Epha7,Pou4f2,Ptprg,Fat3,Syngap1,Ptpn9,Id4,Zfp536,Foxo3,Dlx2,Sema4c,Wnt3a,Ulk2,Sema5b,Pbx1,Bcl11a,Fezf2,Mib1,Rgma,Dennd5a,Rapgef2,Rtn4rl2,Ephb2,Casz1,Mdm2,Zhx2,Epha4,Carm1,Dixdc1,Nkx2-2,Tlx3,Lbx1,Ddx6,Rbpj,Nr2e1,Meis1,Dtx1
4_Member	GO Biological Processes	GO:0048640	negative regulation of developmental growth	-6.91871	-5.03552	37/126	24925,25495,25529,29141,64566,81810,84489,84577,84609,89830,89843,113912,114523,116671,171287,291414,297480,301346,303039,303181,303188,303206,303901,304017,304514,305589,308739,309377,310552,316539,364952,365460,498630,679869,681740,686117,689314	Adrb1,Nog,Ptprs,Gal,Wnt5a,Tgfbr2,Fgfr3,Hdac2,Sema6b,Ptch1,Cxadr,Rtn4r,Ntn1,Cdk5r1,Epha7,Ctdp1,Foxp1,Sema4c,Wwc1,Wnt3a,Rai1,Ulk2,Sema5b,Tomm70,Tbx5,Bcl11a,Rgma,Sfrp5,Sfrp2,Epha4,Nkd1,Tll2,Wwc2,Tcf7l2,Jarid2,Meis1,Mapk11
4_Member	GO Biological Processes	GO:0051129	negative regulation of cellular component organization	-3.81004	-2.36293	120/729	24170,24388,24674,24851,24944,25022,25414,25415,25418,25529,25558,25576,29151,29382,29402,29477,29577,29884,54276,56227,58814,59312,60460,60568,60584,63840,64532,64566,66026,78957,79121,81653,84023,84489,84577,84609,89816,113912,114498,114523,114558,116636,116671,116683,116744,117280,155812,170915,171287,171357,171415,191571,192117,266608,266611,287721,290370,290577,293155,294287,297176,299611,30…	Add1,Gfi1,Ppp3ca,Tpm1,Lamp2,Fgfr2,Bcar1,Crmp1,Dpysl3,Ptprs,Stxbp1,Ywhah,Ucn,Ctbp1,Unc119,Mapt,Hes1,Bok,Neurod2,Espn,Tmod2,Shank3,Hspa2,Syt11,Lif,Per2,Adcy5,Wnt5a,Trpv4,Shank1,Arf6,Dbn1,Ptger4,Fgfr3,Hdac2,Sema6b,Picalm,Rtn4r,Dmrt1,Ntn1,Becn1,Eif4ebp1,Cdk5r1,Efna5,Lpar1,Hnrnpu,Trim9,Ep300,Epha7,Ptprg,Atg3,Fat3,Syngap1,Fzd9,Ptpn9,Vat1,Dnajc15,Wapl,Anapc15,Phf1,Mad2l1,Apc2,Kdm4b,Sema4c,Wnt3a,Ulk2,Lig…
4_Member	GO Biological Processes	GO:0010977	negative regulation of neuron projection development	-3.12348	-1.80963	36/175	24388,24674,25415,25418,25529,25576,29577,64532,64566,66026,79121,84577,84609,113912,114523,116671,116744,171287,171357,191571,192117,266611,301346,303181,303206,303901,305589,308739,308942,310533,311169,313633,314856,316539,363026,679028	Gfi1,Ppp3ca,Crmp1,Dpysl3,Ptprs,Ywhah,Hes1,Adcy5,Wnt5a,Trpv4,Arf6,Hdac2,Sema6b,Rtn4r,Ntn1,Cdk5r1,Lpar1,Epha7,Ptprg,Fat3,Syngap1,Ptpn9,Sema4c,Wnt3a,Ulk2,Sema5b,Bcl11a,Rgma,Dennd5a,Rapgef2,Rtn4rl2,Ephb2,Mdm2,Epha4,Carm1,Rbpj
4_Member	GO Biological Processes	GO:0031345	negative regulation of cell projection organization	-2.26602	-1.14261	38/209	24388,24674,25415,25418,25529,25576,29577,64532,64566,66026,79121,84577,84609,113912,114523,116671,116744,171287,171357,191571,192117,266611,301346,303181,303206,303901,305589,306141,308739,308942,310533,311169,313633,314856,316539,360606,363026,679028	Gfi1,Ppp3ca,Crmp1,Dpysl3,Ptprs,Ywhah,Hes1,Adcy5,Wnt5a,Trpv4,Arf6,Hdac2,Sema6b,Rtn4r,Ntn1,Cdk5r1,Lpar1,Epha7,Ptprg,Fat3,Syngap1,Ptpn9,Sema4c,Wnt3a,Ulk2,Sema5b,Bcl11a,Spry2,Rgma,Dennd5a,Rapgef2,Rtn4rl2,Ephb2,Mdm2,Epha4,Itga3,Carm1,Rbpj
4_Member	GO Biological Processes	GO:0010771	negative regulation of cell morphogenesis involved in differentiation	-2.22981	-1.11704	22/105	24674,25414,25529,25576,64566,84609,113912,114523,116671,116683,171287,192117,301346,303181,303206,303901,305589,308739,310533,313633,316539,362037	Ppp3ca,Bcar1,Ptprs,Ywhah,Wnt5a,Sema6b,Rtn4r,Ntn1,Cdk5r1,Efna5,Epha7,Syngap1,Sema4c,Wnt3a,Ulk2,Sema5b,Bcl11a,Rgma,Rapgef2,Ephb2,Epha4,Ap1ar
4_Member	GO Biological Processes	GO:0050771	negative regulation of axonogenesis	-2.00528	-0.970914	16/72	25529,64566,84609,113912,114523,116671,171287,192117,301346,303181,303206,303901,305589,308739,313633,316539	Ptprs,Wnt5a,Sema6b,Rtn4r,Ntn1,Cdk5r1,Epha7,Syngap1,Sema4c,Wnt3a,Ulk2,Sema5b,Bcl11a,Rgma,Ephb2,Epha4
5_Summary	GO Biological Processes	GO:0030900	forebrain development	-20.4218	-17.2058	134/488	24166,24318,24329,24408,24520,24577,24587,24654,24705,24898,24929,24954,25022,25033,25196,25275,25327,25416,25495,25509,25529,25628,25696,25744,26955,29227,29349,29375,29560,29577,29619,29753,54239,54284,54286,58853,59265,59312,59323,60329,64354,64566,64624,78963,79049,79433,81527,81643,81666,83467,83501,84017,84489,84509,84577,85496,113912,113983,113984,114120,114213,116466,116671,116744,117282,…	Adcyap1,Drd2,Egfr,Grin1,Kcna1,Myc,Nefh,Plcb1,Rara,Slc6a3,Ptger3,Insr,Fgfr2,Sstr1,Inhbb,Cnp,Kcnc1,Dpysl2,Nog,Pax6,Ptprs,Nkx2-1,Vldlr,Nf2,Afdn,Nfib,Fgf8,Uncx,Hif1a,Hes1,Btg2,Ywhae,Chrnb2,Pitx2,Prkg1,Nr4a3,Phlpp1,Shank3,Erbb4,Neurog3,Htr6,Wnt5a,Cul5,Apaf1,Secisbp2,Myh10,Nrp2,Atic,Gnaq,Slit3,Cdh2,Hmga2,Fgfr3,Ran,Hdac2,Enpp1,Rtn4r,Pitx1,Nr2f2,Gng12,Rax,Wnt2b,Cdk5r1,Lpar1,Hnrnpk,Lhx5,Gli3,Lef1,Lhx3,Eif…
5_Member	GO Biological Processes	GO:0030900	forebrain development	-20.4218	-17.2058	134/488	24166,24318,24329,24408,24520,24577,24587,24654,24705,24898,24929,24954,25022,25033,25196,25275,25327,25416,25495,25509,25529,25628,25696,25744,26955,29227,29349,29375,29560,29577,29619,29753,54239,54284,54286,58853,59265,59312,59323,60329,64354,64566,64624,78963,79049,79433,81527,81643,81666,83467,83501,84017,84489,84509,84577,85496,113912,113983,113984,114120,114213,116466,116671,116744,117282,…	Adcyap1,Drd2,Egfr,Grin1,Kcna1,Myc,Nefh,Plcb1,Rara,Slc6a3,Ptger3,Insr,Fgfr2,Sstr1,Inhbb,Cnp,Kcnc1,Dpysl2,Nog,Pax6,Ptprs,Nkx2-1,Vldlr,Nf2,Afdn,Nfib,Fgf8,Uncx,Hif1a,Hes1,Btg2,Ywhae,Chrnb2,Pitx2,Prkg1,Nr4a3,Phlpp1,Shank3,Erbb4,Neurog3,Htr6,Wnt5a,Cul5,Apaf1,Secisbp2,Myh10,Nrp2,Atic,Gnaq,Slit3,Cdh2,Hmga2,Fgfr3,Ran,Hdac2,Enpp1,Rtn4r,Pitx1,Nr2f2,Gng12,Rax,Wnt2b,Cdk5r1,Lpar1,Hnrnpk,Lhx5,Gli3,Lef1,Lhx3,Eif…
5_Member	GO Biological Processes	GO:0021537	telencephalon development	-13.7826	-11.2328	90/329	24318,24329,24408,24520,24587,24654,24705,24954,25416,25495,25509,25529,25628,25696,25744,26955,29227,29349,29375,29560,29577,29619,29753,58853,59265,59312,59323,64354,64566,64624,79049,79433,81527,81643,83467,83501,84509,84577,85496,113912,114120,116671,116744,117282,124451,140588,161452,171145,171438,192126,291023,296499,297480,297893,298504,299117,299907,303181,303477,304495,305198,305581,3057…	Drd2,Egfr,Grin1,Kcna1,Nefh,Plcb1,Rara,Insr,Dpysl2,Nog,Pax6,Ptprs,Nkx2-1,Vldlr,Nf2,Afdn,Nfib,Fgf8,Uncx,Hif1a,Hes1,Btg2,Ywhae,Nr4a3,Phlpp1,Shank3,Erbb4,Htr6,Wnt5a,Cul5,Secisbp2,Myh10,Nrp2,Atic,Slit3,Cdh2,Ran,Hdac2,Enpp1,Rtn4r,Gng12,Cdk5r1,Lpar1,Hnrnpk,Lhx5,Gli3,Lef1,Eif2b3,Crtac1,Dab2ip,Id4,Dlx2,Foxp1,Hdac1,Mfsd2a,Nin,Ext1,Wnt3a,Igf2bp1,Kdm2b,Prdm8,Pex13,Fezf2,Cep120,Csnk2a2,Sall1,Wdr62,Fat4,Rtn4rl…
5_Member	GO Biological Processes	GO:0021543	pallium development	-9.79041	-7.58615	63/231	24329,24408,24520,24587,24654,24705,24954,25495,25509,25529,25628,25696,25744,26955,29349,29560,29619,29753,58853,59265,64354,64624,81527,81643,83501,84509,84577,85496,114120,116671,117282,124451,140588,161452,171145,192126,291023,296499,297893,298504,303181,303477,305581,305719,307302,307641,308492,310341,312299,313471,315059,315135,316052,360773,360840,362229,362280,363062,498949,500453,500987,…	Egfr,Grin1,Kcna1,Nefh,Plcb1,Rara,Insr,Nog,Pax6,Ptprs,Nkx2-1,Vldlr,Nf2,Afdn,Fgf8,Hif1a,Btg2,Ywhae,Nr4a3,Phlpp1,Htr6,Cul5,Nrp2,Atic,Cdh2,Ran,Hdac2,Enpp1,Gng12,Cdk5r1,Hnrnpk,Lhx5,Gli3,Lef1,Eif2b3,Dab2ip,Id4,Dlx2,Hdac1,Mfsd2a,Wnt3a,Igf2bp1,Pex13,Fezf2,Cep120,Csnk2a2,Wdr62,Fat4,Ezh2,Dmrta2,Trappc9,Sun2,Eomes,Sun1,Srgap2,Xrn2,Tfap2c,Dixdc1,Phlpp2,Pax5,H2afx,Nr2e1,Ccdc85c
5_Member	GO Biological Processes	GO:0021761	limbic system development	-6.93216	-5.04589	42/152	24318,24520,24577,24587,24705,24954,25022,25495,25529,25628,25744,29619,29753,54284,58853,59265,81527,84509,84577,85496,114213,116671,117282,124451,140588,161452,171145,288457,291023,296499,297893,298504,303181,305719,312299,353305,362229,364418,367106,498949,679158,684085	Drd2,Kcna1,Myc,Nefh,Rara,Insr,Fgfr2,Nog,Ptprs,Nkx2-1,Nf2,Btg2,Ywhae,Pitx2,Nr4a3,Phlpp1,Nrp2,Ran,Hdac2,Enpp1,Rax,Cdk5r1,Hnrnpk,Lhx5,Gli3,Lef1,Eif2b3,Gsx1,Id4,Dlx2,Hdac1,Mfsd2a,Wnt3a,Fezf2,Ezh2,Tbx3,Xrn2,Nkx2-6,Foxb1,Phlpp2,Sox3,Nr2e1
5_Member	GO Biological Processes	GO:0021987	cerebral cortex development	-6.15811	-4.35865	39/145	24329,24408,24587,24654,25509,25529,25628,25696,26955,29560,29753,64354,64624,81527,81643,83501,85496,114120,116671,117282,140588,192126,305581,307302,307641,308492,310341,313471,315059,315135,316052,360773,360840,362280,363062,500453,500987,684085,690965	Egfr,Grin1,Nefh,Plcb1,Pax6,Ptprs,Nkx2-1,Vldlr,Afdn,Hif1a,Ywhae,Htr6,Cul5,Nrp2,Atic,Cdh2,Enpp1,Gng12,Cdk5r1,Hnrnpk,Gli3,Dab2ip,Pex13,Cep120,Csnk2a2,Wdr62,Fat4,Dmrta2,Trappc9,Sun2,Eomes,Sun1,Srgap2,Tfap2c,Dixdc1,Pax5,H2afx,Nr2e1,Ccdc85c
5_Member	GO Biological Processes	GO:0021766	hippocampus development	-4.65235	-3.04265	31/120	24520,24587,24705,24954,25495,25529,25628,25744,29619,29753,58853,59265,84509,84577,85496,116671,117282,124451,140588,161452,171145,291023,296499,297893,298504,303181,305719,312299,362229,498949,684085	Kcna1,Nefh,Rara,Insr,Nog,Ptprs,Nkx2-1,Nf2,Btg2,Ywhae,Nr4a3,Phlpp1,Ran,Hdac2,Enpp1,Cdk5r1,Hnrnpk,Lhx5,Gli3,Lef1,Eif2b3,Id4,Dlx2,Hdac1,Mfsd2a,Wnt3a,Fezf2,Ezh2,Xrn2,Phlpp2,Nr2e1
6_Summary	GO Biological Processes	GO:0060070	canonical Wnt signaling pathway	-19.2575	-16.1141	89/270	24329,24577,25022,25216,25444,25495,25631,29349,29466,29657,50566,50677,54254,58822,58919,59114,64462,64566,81649,81666,81736,83501,84424,84482,84489,84577,85471,114109,114487,116466,116477,116643,116777,140584,140588,140593,161452,192126,192270,246768,266608,266715,282581,287647,290317,294515,297893,298696,299611,299802,303181,303586,303811,305922,306782,308068,308265,308703,308766,308896,309377…	Egfr,Myc,Fgfr2,Sdc1,Fgf9,Nog,Smad3,Fgf8,Aes,Arntl,Grem1,Ptpro,Gata4,Csnk1e,Ccnd1,Slc9a3r1,Csnk1d,Wnt5a,Mapk14,Gnaq,Nfkb1,Cdh2,Tle3,Foxo1,Fgfr3,Hdac2,Gata3,Nkx2-5,Wnt2,Wnt2b,Wnk1,Vcp,Cdh3,Wnt11,Gli3,Siah2,Lef1,Dab2ip,Plpp3,Cby1,Fzd9,Fzd3,Fzd6,Hoxb9,Sox7,Foxo3,Hdac1,Pin1,Apc2,Lgr5,Wnt3a,Wnt9b,Dvl3,Lats2,Ror2,Nkd2,Lats1,Lrrk1,Mesp1,Usp47,Sfrp5,Jade1,Sfrp2,Sulf2,Tcf7l1,Sox17,Cyld,Rspo1,Stk11,Scyl2,Jr…
6_Member	GO Biological Processes	GO:0060070	canonical Wnt signaling pathway	-19.2575	-16.1141	89/270	24329,24577,25022,25216,25444,25495,25631,29349,29466,29657,50566,50677,54254,58822,58919,59114,64462,64566,81649,81666,81736,83501,84424,84482,84489,84577,85471,114109,114487,116466,116477,116643,116777,140584,140588,140593,161452,192126,192270,246768,266608,266715,282581,287647,290317,294515,297893,298696,299611,299802,303181,303586,303811,305922,306782,308068,308265,308703,308766,308896,309377…	Egfr,Myc,Fgfr2,Sdc1,Fgf9,Nog,Smad3,Fgf8,Aes,Arntl,Grem1,Ptpro,Gata4,Csnk1e,Ccnd1,Slc9a3r1,Csnk1d,Wnt5a,Mapk14,Gnaq,Nfkb1,Cdh2,Tle3,Foxo1,Fgfr3,Hdac2,Gata3,Nkx2-5,Wnt2,Wnt2b,Wnk1,Vcp,Cdh3,Wnt11,Gli3,Siah2,Lef1,Dab2ip,Plpp3,Cby1,Fzd9,Fzd3,Fzd6,Hoxb9,Sox7,Foxo3,Hdac1,Pin1,Apc2,Lgr5,Wnt3a,Wnt9b,Dvl3,Lats2,Ror2,Nkd2,Lats1,Lrrk1,Mesp1,Usp47,Sfrp5,Jade1,Sfrp2,Sulf2,Tcf7l1,Sox17,Cyld,Rspo1,Stk11,Scyl2,Jr…
6_Member	GO Biological Processes	GO:0016055	Wnt signaling pathway	-18.1053	-15.1032	112/397	24318,24329,24577,24817,25022,25216,25444,25495,25631,25640,27080,29349,29466,29657,50566,50677,54254,54284,58822,58919,59114,60328,64462,64566,65157,81649,81666,81736,83466,83501,84017,84424,84482,84489,84577,85471,114109,114487,116466,116477,116643,116777,140584,140588,140593,161452,192126,192270,246768,266608,266715,282581,287102,287647,289229,289992,290317,294515,297893,298555,298696,299611,2…	Drd2,Egfr,Myc,Hnf1a,Fgfr2,Sdc1,Fgf9,Nog,Smad3,Hnf1b,Hbp1,Fgf8,Aes,Arntl,Grem1,Ptpro,Gata4,Pitx2,Csnk1e,Ccnd1,Slc9a3r1,Mark2,Csnk1d,Wnt5a,Amotl2,Mapk14,Gnaq,Nfkb1,Celsr3,Cdh2,Hmga2,Tle3,Foxo1,Fgfr3,Hdac2,Gata3,Nkx2-5,Wnt2,Wnt2b,Wnk1,Vcp,Cdh3,Wnt11,Gli3,Siah2,Lef1,Dab2ip,Plpp3,Cby1,Fzd9,Fzd3,Fzd6,Kremen2,Hoxb9,Vangl2,Fermt2,Sox7,Foxo3,Hdac1,Grhl3,Pin1,Apc2,Lgr5,Celsr1,Wnt3a,Hic1,Wnt9b,Dvl3,Lats2,Ro…
6_Member	GO Biological Processes	GO:0198738	cell-cell signaling by wnt	-17.9245	-14.946	112/399	24318,24329,24577,24817,25022,25216,25444,25495,25631,25640,27080,29349,29466,29657,50566,50677,54254,54284,58822,58919,59114,60328,64462,64566,65157,81649,81666,81736,83466,83501,84017,84424,84482,84489,84577,85471,114109,114487,116466,116477,116643,116777,140584,140588,140593,161452,192126,192270,246768,266608,266715,282581,287102,287647,289229,289992,290317,294515,297893,298555,298696,299611,2…	Drd2,Egfr,Myc,Hnf1a,Fgfr2,Sdc1,Fgf9,Nog,Smad3,Hnf1b,Hbp1,Fgf8,Aes,Arntl,Grem1,Ptpro,Gata4,Pitx2,Csnk1e,Ccnd1,Slc9a3r1,Mark2,Csnk1d,Wnt5a,Amotl2,Mapk14,Gnaq,Nfkb1,Celsr3,Cdh2,Hmga2,Tle3,Foxo1,Fgfr3,Hdac2,Gata3,Nkx2-5,Wnt2,Wnt2b,Wnk1,Vcp,Cdh3,Wnt11,Gli3,Siah2,Lef1,Dab2ip,Plpp3,Cby1,Fzd9,Fzd3,Fzd6,Kremen2,Hoxb9,Vangl2,Fermt2,Sox7,Foxo3,Hdac1,Grhl3,Pin1,Apc2,Lgr5,Celsr1,Wnt3a,Hic1,Wnt9b,Dvl3,Lats2,Ro…
6_Member	GO Biological Processes	GO:1905114	cell surface receptor signaling pathway involved in cell-cell signaling	-16.9276	-14.0319	131/515	24225,24318,24329,24408,24411,24577,24674,24817,24925,25022,25216,25444,25495,25590,25631,25640,27080,29349,29415,29466,29657,50566,50677,54239,54254,54284,58822,58919,59114,59312,60328,64462,64566,65157,78957,81649,81653,81666,81736,83466,83501,84017,84424,84482,84489,84556,84577,85471,114109,114487,116466,116477,116643,116777,117096,117542,140584,140588,140593,161452,192126,192270,246768,266608…	Bdnf,Drd2,Egfr,Grin1,Grin2c,Myc,Ppp3ca,Hnf1a,Adrb1,Fgfr2,Sdc1,Fgf9,Nog,Chrna4,Smad3,Hnf1b,Hbp1,Fgf8,S1pr2,Aes,Arntl,Grem1,Ptpro,Chrnb2,Gata4,Pitx2,Csnk1e,Ccnd1,Slc9a3r1,Shank3,Mark2,Csnk1d,Wnt5a,Amotl2,Shank1,Mapk14,Dbn1,Gnaq,Nfkb1,Celsr3,Cdh2,Hmga2,Tle3,Foxo1,Fgfr3,Rims1,Hdac2,Gata3,Nkx2-5,Wnt2,Wnt2b,Wnk1,Vcp,Cdh3,Nlgn2,Baiap2,Wnt11,Gli3,Siah2,Lef1,Dab2ip,Plpp3,Cby1,Fzd9,Fzd3,Fzd6,Kremen2,Hoxb9,…
6_Member	GO Biological Processes	GO:0060828	regulation of canonical Wnt signaling pathway	-16.4929	-13.6258	72/212	24329,25022,25444,25495,25631,29466,29657,50566,50677,58822,59114,64462,64566,81649,81666,81736,83501,84424,84482,84489,84577,114109,114487,116466,116477,116643,140584,140588,140593,161452,192126,246768,266608,282581,290317,294515,297893,298696,299611,299802,303181,305922,306782,308068,308265,308703,308766,308896,309377,310352,310552,311642,312936,312937,313589,314717,315073,315870,361261,362316,…	Egfr,Fgfr2,Fgf9,Nog,Smad3,Aes,Arntl,Grem1,Ptpro,Csnk1e,Slc9a3r1,Csnk1d,Wnt5a,Mapk14,Gnaq,Nfkb1,Cdh2,Tle3,Foxo1,Fgfr3,Hdac2,Nkx2-5,Wnt2,Wnt2b,Wnk1,Vcp,Wnt11,Gli3,Siah2,Lef1,Dab2ip,Cby1,Fzd9,Fzd6,Sox7,Foxo3,Hdac1,Pin1,Apc2,Lgr5,Wnt3a,Lats2,Ror2,Nkd2,Lats1,Lrrk1,Mesp1,Usp47,Sfrp5,Jade1,Sfrp2,Sulf2,Sox17,Cyld,Rspo1,Scyl2,Jrk,Tbx18,Ccny,Cdk14,Gskip,Dixdc1,Sox4,Nkd1,Shisa6,Amer2,Rspo2,Rbpj,Tcf7l2,Zfp70…
6_Member	GO Biological Processes	GO:0030111	regulation of Wnt signaling pathway	-16.1574	-13.3472	86/283	24329,24817,25022,25444,25495,25631,25640,29466,29657,50566,50677,58822,58919,59114,64462,64566,81649,81666,81736,83501,84017,84424,84482,84489,84577,114109,114487,116466,116477,116643,140584,140588,140593,161452,192126,192270,246768,266608,282581,289229,290317,294515,297893,298696,299611,299802,303181,303310,305922,306782,307740,308068,308265,308703,308766,308896,309377,310352,310552,310553,3116…	Egfr,Hnf1a,Fgfr2,Fgf9,Nog,Smad3,Hnf1b,Aes,Arntl,Grem1,Ptpro,Csnk1e,Ccnd1,Slc9a3r1,Csnk1d,Wnt5a,Mapk14,Gnaq,Nfkb1,Cdh2,Hmga2,Tle3,Foxo1,Fgfr3,Hdac2,Nkx2-5,Wnt2,Wnt2b,Wnk1,Vcp,Wnt11,Gli3,Siah2,Lef1,Dab2ip,Plpp3,Cby1,Fzd9,Fzd6,Vangl2,Sox7,Foxo3,Hdac1,Pin1,Apc2,Lgr5,Wnt3a,Hic1,Lats2,Ror2,Sall1,Nkd2,Lats1,Lrrk1,Mesp1,Usp47,Sfrp5,Jade1,Sfrp2,Tlr2,Sulf2,Abl1,Sox17,Cyld,Rspo1,Stk11,Scyl2,Jrk,Tbx18,Itga3,…
6_Member	GO Biological Processes	GO:0090090	negative regulation of canonical Wnt signaling pathway	-8.41339	-6.34357	38/117	25495,29466,50566,50677,59114,64566,81649,83501,84424,84482,84577,114109,140584,140588,140593,161452,192126,246768,282581,294515,297893,299611,305922,306782,308068,308265,308766,309377,310352,310552,312936,312937,314717,315870,364952,497926,498529,679869	Nog,Aes,Grem1,Ptpro,Slc9a3r1,Wnt5a,Mapk14,Cdh2,Tle3,Foxo1,Hdac2,Nkx2-5,Wnt11,Gli3,Siah2,Lef1,Dab2ip,Cby1,Fzd6,Foxo3,Hdac1,Apc2,Lats2,Ror2,Nkd2,Lats1,Mesp1,Sfrp5,Jade1,Sfrp2,Sox17,Cyld,Scyl2,Tbx18,Nkd1,Shisa6,Amer2,Tcf7l2
6_Member	GO Biological Processes	GO:0090263	positive regulation of canonical Wnt signaling pathway	-7.53287	-5.56149	31/91	24329,25022,25444,25631,29657,58822,64462,64566,81736,84489,114487,116466,116477,116643,266608,298696,299802,303181,306782,308703,308896,310552,311642,313589,315073,362778,363062,364712,500863,679028,686779	Egfr,Fgfr2,Fgf9,Smad3,Arntl,Csnk1e,Csnk1d,Wnt5a,Nfkb1,Fgfr3,Wnt2,Wnt2b,Wnk1,Vcp,Fzd9,Pin1,Lgr5,Wnt3a,Ror2,Lrrk1,Usp47,Sfrp2,Sulf2,Rspo1,Jrk,Gskip,Dixdc1,Sox4,Rspo2,Rbpj,Caprin2
6_Member	GO Biological Processes	GO:0030178	negative regulation of Wnt signaling pathway	-7.40323	-5.44255	43/152	25444,25495,29466,50566,50677,58822,58919,59114,64566,81649,83501,84017,84424,84482,84577,114109,140584,140588,140593,161452,192126,246768,282581,294515,297893,299611,303310,305922,306782,308068,308265,308766,309377,310352,310552,312936,312937,314717,315870,364952,497926,498529,679869	Fgf9,Nog,Aes,Grem1,Ptpro,Csnk1e,Ccnd1,Slc9a3r1,Wnt5a,Mapk14,Cdh2,Hmga2,Tle3,Foxo1,Hdac2,Nkx2-5,Wnt11,Gli3,Siah2,Lef1,Dab2ip,Cby1,Fzd6,Foxo3,Hdac1,Apc2,Hic1,Lats2,Ror2,Nkd2,Lats1,Mesp1,Sfrp5,Jade1,Sfrp2,Sox17,Cyld,Scyl2,Tbx18,Nkd1,Shisa6,Amer2,Tcf7l2
6_Member	GO Biological Processes	GO:0030177	positive regulation of Wnt signaling pathway	-6.71076	-4.85281	36/123	24329,25022,25444,25631,29657,58822,64462,64566,81736,84489,114487,116466,116477,116643,266608,298696,299802,303181,306782,307740,308703,308896,310552,310553,311642,311860,313589,315073,362778,362802,363062,364712,364952,500863,679028,686779	Egfr,Fgfr2,Fgf9,Smad3,Arntl,Csnk1e,Csnk1d,Wnt5a,Nfkb1,Fgfr3,Wnt2,Wnt2b,Wnk1,Vcp,Fzd9,Pin1,Lgr5,Wnt3a,Ror2,Sall1,Lrrk1,Usp47,Sfrp2,Tlr2,Sulf2,Abl1,Rspo1,Jrk,Gskip,Atp6v1c2,Dixdc1,Sox4,Nkd1,Rspo2,Rbpj,Caprin2
7_Summary	GO Biological Processes	GO:0001501	skeletal system development	-18.8388	-15.7276	136/518	24162,24373,24577,24680,24695,24705,24831,25022,25266,25267,25304,25339,25444,25495,25546,25631,25667,29227,29345,29349,29375,29466,29560,50566,54267,54284,56813,59328,64060,64468,64566,66026,81649,81666,81809,81810,83470,83476,83727,83838,84017,84023,84399,84489,113983,114029,114593,114634,116466,116499,116564,116723,140584,140588,156726,170915,171356,252834,287534,287644,287647,287662,288153,28…	Acp2,Fst,Myc,Prkca,Pthlh,Rara,Thrb,Fgfr2,Pdgfa,Pdgfra,Comp,Npr3,Fgf9,Nog,Shox2,Smad3,Bmp3,Nfib,Serpinh1,Fgf8,Uncx,Aes,Hif1a,Grem1,Maf,Pitx2,Pth1r,Smad5,Vps33b,Hyal2,Wnt5a,Trpv4,Mapk14,Gnaq,Tgfb2,Tgfbr2,Bmp1,Cyr61,Fbn1,Ltbp3,Hmga2,Ptger4,Ihh,Fgfr3,Pitx1,Megf8,Nppc,Six1,Wnt2b,Fgf4,Npr2,Pip4k2a,Wnt11,Gli3,Runx3,Ep300,Foxc2,Gdf6,Rflnb,Phospho1,Hoxb9,Pcgf2,Hoxd4,Hoxd13,Sbds,Tesc,Hhip,Papss2,Hexb,Tcf15…
7_Member	GO Biological Processes	GO:0001501	skeletal system development	-18.8388	-15.7276	136/518	24162,24373,24577,24680,24695,24705,24831,25022,25266,25267,25304,25339,25444,25495,25546,25631,25667,29227,29345,29349,29375,29466,29560,50566,54267,54284,56813,59328,64060,64468,64566,66026,81649,81666,81809,81810,83470,83476,83727,83838,84017,84023,84399,84489,113983,114029,114593,114634,116466,116499,116564,116723,140584,140588,156726,170915,171356,252834,287534,287644,287647,287662,288153,28…	Acp2,Fst,Myc,Prkca,Pthlh,Rara,Thrb,Fgfr2,Pdgfa,Pdgfra,Comp,Npr3,Fgf9,Nog,Shox2,Smad3,Bmp3,Nfib,Serpinh1,Fgf8,Uncx,Aes,Hif1a,Grem1,Maf,Pitx2,Pth1r,Smad5,Vps33b,Hyal2,Wnt5a,Trpv4,Mapk14,Gnaq,Tgfb2,Tgfbr2,Bmp1,Cyr61,Fbn1,Ltbp3,Hmga2,Ptger4,Ihh,Fgfr3,Pitx1,Megf8,Nppc,Six1,Wnt2b,Fgf4,Npr2,Pip4k2a,Wnt11,Gli3,Runx3,Ep300,Foxc2,Gdf6,Rflnb,Phospho1,Hoxb9,Pcgf2,Hoxd4,Hoxd13,Sbds,Tesc,Hhip,Papss2,Hexb,Tcf15…
7_Member	GO Biological Processes	GO:0048705	skeletal system morphogenesis	-9.80022	-7.59209	68/258	24577,24695,24705,25022,25267,25304,25495,25546,25631,29345,29375,50566,64468,66026,81649,81809,81810,83838,84399,84489,114029,114593,114634,116499,140588,171356,287534,287644,287662,288153,291936,296272,296358,296499,296511,298878,299138,303399,303586,306782,306862,310467,310552,311505,312495,313757,313922,314694,314910,315039,315615,353252,360737,362735,363026,363111,363165,364706,365793,497985…	Myc,Pthlh,Rara,Fgfr2,Pdgfra,Comp,Nog,Shox2,Smad3,Serpinh1,Uncx,Grem1,Hyal2,Trpv4,Mapk14,Tgfb2,Tgfbr2,Ltbp3,Ihh,Fgfr3,Megf8,Nppc,Six1,Fgf4,Gli3,Foxc2,Rflnb,Phospho1,Pcgf2,Hoxd4,Hhip,Tcf15,Matn4,Dlx2,Alx4,Osr1,Six4,Tbx4,Wnt9b,Ror2,Tfap2a,Tiparp,Sfrp2,Pax1,Cyp26b1,Ski,Asxl2,Chst11,Nab2,Osr2,Dscaml1,Rdh10,Tbx1,Coch,Carm1,Ripply2,Csrnp1,Foxc1,Rab33b,Hoxb7,Irx5,Scube2,Pax5,Gas1,Flvcr1,Hoxd9,Hoxb2,Hoxa3
7_Member	GO Biological Processes	GO:0051216	cartilage development	-9.44843	-7.26664	57/203	24680,24695,24705,24831,25304,25444,25495,25546,25631,25667,29227,29345,29375,29560,50566,54267,56813,59328,64468,64566,66026,81649,81809,81810,83470,83476,83838,84017,84399,84489,113983,114593,116466,116499,140588,156726,252834,287534,296358,296499,298878,306782,310552,311642,314694,315039,315196,315478,315879,362735,363026,499241,500574,500863,683007,100910434,103690130	Prkca,Pthlh,Rara,Thrb,Comp,Fgf9,Nog,Shox2,Smad3,Bmp3,Nfib,Serpinh1,Uncx,Hif1a,Grem1,Maf,Pth1r,Smad5,Hyal2,Wnt5a,Trpv4,Mapk14,Tgfb2,Tgfbr2,Bmp1,Cyr61,Ltbp3,Hmga2,Ihh,Fgfr3,Pitx1,Nppc,Wnt2b,Fgf4,Gli3,Runx3,Gdf6,Rflnb,Matn4,Dlx2,Osr1,Ror2,Sfrp2,Sulf2,Chst11,Osr2,Wnt7b,Snx19,Adamts7,Coch,Carm1,Scube2,Pax7,Rspo2,Mia3,Chadl,Hoxa3
7_Member	GO Biological Processes	GO:0061448	connective tissue development	-9.19766	-7.04412	70/277	24628,24680,24695,24705,24831,24883,25099,25266,25304,25444,25495,25546,25631,25667,29227,29345,29375,29560,50566,54267,56813,59328,64468,64566,66026,78965,81649,81809,81810,83470,83476,83838,84017,84399,84489,85490,113983,114593,116466,116499,140588,156726,171299,171356,246771,252833,252834,287534,291023,296358,296499,297508,298878,306782,309945,310552,311642,314694,315039,315196,315478,315879,3…	Pdgfb,Prkca,Pthlh,Rara,Thrb,Wt1,Foxa2,Pdgfa,Comp,Fgf9,Nog,Shox2,Smad3,Bmp3,Nfib,Serpinh1,Uncx,Hif1a,Grem1,Maf,Pth1r,Smad5,Hyal2,Wnt5a,Trpv4,Csf1,Mapk14,Tgfb2,Tgfbr2,Bmp1,Cyr61,Ltbp3,Hmga2,Ihh,Fgfr3,Col5a1,Pitx1,Nppc,Wnt2b,Fgf4,Gli3,Runx3,Foxd1,Foxc2,Slc25a25,Gdf7,Gdf6,Rflnb,Id4,Matn4,Dlx2,Nampt,Osr1,Ror2,Arrdc3,Sfrp2,Sulf2,Chst11,Osr2,Wnt7b,Snx19,Adamts7,Coch,Carm1,Scube2,Pax7,Rspo2,Mia3,Chadl,Ho…
7_Member	GO Biological Processes	GO:0060348	bone development	-7.18103	-5.25002	56/226	24695,24705,25022,25266,25304,25546,29345,29349,50566,54284,59328,64060,66026,81809,81810,83727,83838,84023,84399,84489,114029,114593,116499,116564,116723,140588,170915,287534,287644,288615,288689,294103,296358,297480,304334,306862,308703,310341,310552,311505,311642,312495,313757,313922,314910,315039,362735,363026,363058,363111,364706,499241,500689,680537,686117,691504	Pthlh,Rara,Fgfr2,Pdgfa,Comp,Shox2,Serpinh1,Fgf8,Grem1,Pitx2,Smad5,Vps33b,Trpv4,Tgfb2,Tgfbr2,Fbn1,Ltbp3,Ptger4,Ihh,Fgfr3,Megf8,Nppc,Fgf4,Npr2,Pip4k2a,Gli3,Ep300,Rflnb,Phospho1,Sbds,Tesc,Papss2,Matn4,Foxp1,Fam20c,Tfap2a,Lrrk1,Fat4,Sfrp2,Pax1,Sulf2,Cyp26b1,Ski,Asxl2,Nab2,Osr2,Coch,Carm1,Cadm1,Ripply2,Foxc1,Scube2,Ttc9,Nsd2,Meis1,Zfpm1
7_Member	GO Biological Processes	GO:0002062	chondrocyte differentiation	-6.29534	-4.48204	34/117	24680,24695,24831,25444,25546,25631,29227,29345,50566,54267,56813,81649,81810,83838,84017,84399,114593,116466,140588,156726,252834,287534,296358,298878,310552,311642,314694,315039,315478,315879,362735,499241,683007,100910434	Prkca,Pthlh,Thrb,Fgf9,Shox2,Smad3,Nfib,Serpinh1,Grem1,Maf,Pth1r,Mapk14,Tgfbr2,Ltbp3,Hmga2,Ihh,Nppc,Wnt2b,Gli3,Runx3,Gdf6,Rflnb,Matn4,Osr1,Sfrp2,Sulf2,Chst11,Osr2,Snx19,Adamts7,Coch,Scube2,Mia3,Chadl
7_Member	GO Biological Processes	GO:0060349	bone morphogenesis	-4.53309	-2.94413	30/116	24695,24705,25022,25304,25546,29345,66026,81809,81810,83838,84399,84489,114029,114593,116499,140588,287644,296358,306862,310552,311505,312495,313757,314910,315039,362735,363026,363111,364706,499241	Pthlh,Rara,Fgfr2,Comp,Shox2,Serpinh1,Trpv4,Tgfb2,Tgfbr2,Ltbp3,Ihh,Fgfr3,Megf8,Nppc,Fgf4,Gli3,Phospho1,Matn4,Tfap2a,Sfrp2,Pax1,Cyp26b1,Ski,Nab2,Osr2,Coch,Carm1,Ripply2,Foxc1,Scube2
7_Member	GO Biological Processes	GO:0060351	cartilage development involved in endochondral bone morphogenesis	-2.18344	-1.09872	12/46	24705,25304,25546,29345,66026,81810,84399,114593,296358,362735,363026,499241	Rara,Comp,Shox2,Serpinh1,Trpv4,Tgfbr2,Ihh,Nppc,Matn4,Coch,Carm1,Scube2
7_Member	GO Biological Processes	GO:0060350	endochondral bone morphogenesis	-2.06469	-1.00699	16/71	24695,24705,25304,25546,29345,66026,81810,84399,114593,287644,296358,314910,362735,363026,364706,499241	Pthlh,Rara,Comp,Shox2,Serpinh1,Trpv4,Tgfbr2,Ihh,Nppc,Phospho1,Matn4,Nab2,Coch,Carm1,Foxc1,Scube2
8_Summary	GO Biological Processes	GO:0045165	cell fate commitment	-18.1231	-15.1032	87/270	24388,24705,24883,25022,25099,25509,25628,25640,25664,29146,29349,29577,54254,56718,59323,59328,64566,65193,81809,84010,84399,84489,85471,89830,113983,113984,114109,114486,114487,114502,114634,116466,140584,140588,170671,171356,246271,252833,288457,288736,289026,292934,293184,293976,293992,294299,296499,299611,300807,303181,303586,305719,305922,306141,306782,307376,307579,308265,308766,309095,310…	Gfi1,Rara,Wt1,Fgfr2,Foxa2,Pax6,Nkx2-1,Hnf1b,Pparg,Jag1,Fgf8,Hes1,Gata4,Mtor,Erbb4,Smad5,Wnt5a,Nkx6-1,Tgfb2,Dll1,Ihh,Fgfr3,Gata3,Ptch1,Pitx1,Nr2f2,Nkx2-5,Braf,Wnt2,Pax3,Six1,Wnt2b,Wnt11,Gli3,Lhx3,Foxc2,Fev,Gdf7,Gsx1,Foxn4,Sox13,Dbx1,Ctr9,Dmrt3,Pax2,Tead3,Dlx2,Apc2,Rora,Wnt3a,Wnt9b,Fezf2,Lats2,Spry2,Ror2,Onecut2,Zfp521,Lats1,Mesp1,Nkx6-2,Sfrp2,Arhgef2,Dll4,Cyp26b1,Sox17,Cyld,Dmrta2,Casz1,Wnt7b,Eome…
8_Member	GO Biological Processes	GO:0045165	cell fate commitment	-18.1231	-15.1032	87/270	24388,24705,24883,25022,25099,25509,25628,25640,25664,29146,29349,29577,54254,56718,59323,59328,64566,65193,81809,84010,84399,84489,85471,89830,113983,113984,114109,114486,114487,114502,114634,116466,140584,140588,170671,171356,246271,252833,288457,288736,289026,292934,293184,293976,293992,294299,296499,299611,300807,303181,303586,305719,305922,306141,306782,307376,307579,308265,308766,309095,310…	Gfi1,Rara,Wt1,Fgfr2,Foxa2,Pax6,Nkx2-1,Hnf1b,Pparg,Jag1,Fgf8,Hes1,Gata4,Mtor,Erbb4,Smad5,Wnt5a,Nkx6-1,Tgfb2,Dll1,Ihh,Fgfr3,Gata3,Ptch1,Pitx1,Nr2f2,Nkx2-5,Braf,Wnt2,Pax3,Six1,Wnt2b,Wnt11,Gli3,Lhx3,Foxc2,Fev,Gdf7,Gsx1,Foxn4,Sox13,Dbx1,Ctr9,Dmrt3,Pax2,Tead3,Dlx2,Apc2,Rora,Wnt3a,Wnt9b,Fezf2,Lats2,Spry2,Ror2,Onecut2,Zfp521,Lats1,Mesp1,Nkx6-2,Sfrp2,Arhgef2,Dll4,Cyp26b1,Sox17,Cyld,Dmrta2,Casz1,Wnt7b,Eome…
8_Member	GO Biological Processes	GO:0048663	neuron fate commitment	-9.95707	-7.72911	32/79	25099,25509,25628,29577,65193,81809,84010,84399,114502,114634,140588,170671,246271,288457,288736,292934,293976,296499,305719,307579,309095,311332,313471,313713,362280,366214,497881,499362,500574,679028,682076,691153	Foxa2,Pax6,Nkx2-1,Hes1,Nkx6-1,Tgfb2,Dll1,Ihh,Pax3,Six1,Gli3,Lhx3,Fev,Gsx1,Foxn4,Dbx1,Dmrt3,Dlx2,Fezf2,Zfp521,Nkx6-2,Dll4,Dmrta2,Casz1,Tfap2c,Nkx2-2,Tlx3,Lbx1,Pax7,Rbpj,Mnx1,Epop
8_Member	GO Biological Processes	GO:0021510	spinal cord development	-8.05675	-6.02729	40/130	24587,25398,25416,25495,25509,25529,25696,29375,56718,60329,64618,65193,83467,84010,89830,114502,117018,124451,140588,170671,252833,288457,288736,292934,293976,297480,303181,309095,311332,314180,361938,364712,366214,367106,498328,499211,499362,500574,682076,689988	Nefh,Cacna1a,Dpysl2,Nog,Pax6,Ptprs,Vldlr,Uncx,Mtor,Neurog3,Zic1,Nkx6-1,Slit3,Dll1,Ptch1,Pax3,Kcnh2,Lhx5,Gli3,Lhx3,Gdf7,Gsx1,Foxn4,Dbx1,Dmrt3,Foxp1,Wnt3a,Nkx6-2,Dll4,Mdga2,Intu,Sox4,Nkx2-2,Foxb1,Pkd2,Gdpd5,Lbx1,Pax7,Mnx1,Sox12
8_Member	GO Biological Processes	GO:0021515	cell differentiation in spinal cord	-7.47819	-5.5131	23/56	25398,25509,65193,89830,114502,124451,140588,170671,252833,288457,288736,292934,293976,303181,309095,311332,314180,364712,366214,499211,499362,500574,682076	Cacna1a,Pax6,Nkx6-1,Ptch1,Pax3,Lhx5,Gli3,Lhx3,Gdf7,Gsx1,Foxn4,Dbx1,Dmrt3,Wnt3a,Nkx6-2,Dll4,Mdga2,Sox4,Nkx2-2,Gdpd5,Lbx1,Pax7,Mnx1
8_Member	GO Biological Processes	GO:0001708	cell fate specification	-7.31992	-5.3668	30/88	24388,25099,25509,25640,65193,84010,84399,89830,114634,140588,170671,246271,292934,293976,293992,299611,303181,308766,309095,310552,312936,313471,316052,360737,366214,497881,499362,679028,682076,100360552	Gfi1,Foxa2,Pax6,Hnf1b,Nkx6-1,Dll1,Ihh,Ptch1,Six1,Gli3,Lhx3,Fev,Dbx1,Dmrt3,Pax2,Apc2,Wnt3a,Mesp1,Nkx6-2,Sfrp2,Sox17,Dmrta2,Eomes,Tbx1,Nkx2-2,Tlx3,Lbx1,Rbpj,Mnx1,Fzd7
8_Member	GO Biological Processes	GO:0048665	neuron fate specification	-5.94027	-4.17007	16/36	25099,25509,65193,84010,114634,140588,170671,246271,292934,293976,309095,313471,366214,497881,499362,682076	Foxa2,Pax6,Nkx6-1,Dll1,Six1,Gli3,Lhx3,Fev,Dbx1,Dmrt3,Nkx6-2,Dmrta2,Nkx2-2,Tlx3,Lbx1,Mnx1
8_Member	GO Biological Processes	GO:0021517	ventral spinal cord development	-5.67377	-3.92563	19/50	25398,25509,25696,65193,89830,140588,170671,288736,292934,293976,297480,309095,311332,314180,364712,366214,499211,499362,682076	Cacna1a,Pax6,Vldlr,Nkx6-1,Ptch1,Gli3,Lhx3,Foxn4,Dbx1,Dmrt3,Foxp1,Nkx6-2,Dll4,Mdga2,Sox4,Nkx2-2,Gdpd5,Lbx1,Mnx1
8_Member	GO Biological Processes	GO:0060579	ventral spinal cord interneuron fate commitment	-5.62586	-3.88966	10/16	25509,65193,140588,170671,288736,292934,293976,309095,311332,366214	Pax6,Nkx6-1,Gli3,Lhx3,Foxn4,Dbx1,Dmrt3,Nkx6-2,Dll4,Nkx2-2
8_Member	GO Biological Processes	GO:0060581	cell fate commitment involved in pattern specification	-5.62586	-3.88966	10/16	25509,65193,140588,170671,288736,292934,293976,309095,311332,366214	Pax6,Nkx6-1,Gli3,Lhx3,Foxn4,Dbx1,Dmrt3,Nkx6-2,Dll4,Nkx2-2
8_Member	GO Biological Processes	GO:0021514	ventral spinal cord interneuron differentiation	-4.98718	-3.32863	10/18	25509,65193,140588,170671,288736,292934,293976,309095,311332,366214	Pax6,Nkx6-1,Gli3,Lhx3,Foxn4,Dbx1,Dmrt3,Nkx6-2,Dll4,Nkx2-2
8_Member	GO Biological Processes	GO:0021513	spinal cord dorsal/ventral patterning	-4.20499	-2.66781	11/25	25509,65193,140588,170671,288736,292934,293976,309095,311332,361938,366214	Pax6,Nkx6-1,Gli3,Lhx3,Foxn4,Dbx1,Dmrt3,Nkx6-2,Dll4,Intu,Nkx2-2
8_Member	GO Biological Processes	GO:0060850	regulation of transcription involved in cell fate commitment	-4.06194	-2.55294	9/18	25509,25664,65193,113984,296499,300807,309095,312936,499362	Pax6,Pparg,Nkx6-1,Nr2f2,Dlx2,Rora,Nkx6-2,Sox17,Lbx1
8_Member	GO Biological Processes	GO:0021522	spinal cord motor neuron differentiation	-3.94534	-2.46179	13/35	25398,25509,65193,89830,140588,170671,309095,314180,364712,366214,499211,499362,682076	Cacna1a,Pax6,Nkx6-1,Ptch1,Gli3,Lhx3,Nkx6-2,Mdga2,Sox4,Nkx2-2,Gdpd5,Lbx1,Mnx1
8_Member	GO Biological Processes	GO:0021511	spinal cord patterning	-3.83785	-2.3826	11/27	25509,65193,140588,170671,288736,292934,293976,309095,311332,361938,366214	Pax6,Nkx6-1,Gli3,Lhx3,Foxn4,Dbx1,Dmrt3,Nkx6-2,Dll4,Intu,Nkx2-2
8_Member	GO Biological Processes	GO:0021521	ventral spinal cord interneuron specification	-3.80001	-2.35969	7/12	25509,65193,140588,170671,292934,293976,309095	Pax6,Nkx6-1,Gli3,Lhx3,Dbx1,Dmrt3,Nkx6-2
8_Member	GO Biological Processes	GO:0060573	cell fate specification involved in pattern specification	-3.80001	-2.35969	7/12	25509,65193,140588,170671,292934,293976,309095	Pax6,Nkx6-1,Gli3,Lhx3,Dbx1,Dmrt3,Nkx6-2
8_Member	GO Biological Processes	GO:0021912	regulation of transcription from RNA polymerase II promoter involved in spinal cord motor neuron fat	-2.76778	-1.53025	3/3	25509,65193,309095	Pax6,Nkx6-1,Nkx6-2
8_Member	GO Biological Processes	GO:0021520	spinal cord motor neuron cell fate specification	-2.62788	-1.42092	6/13	25509,65193,140588,170671,309095,682076	Pax6,Nkx6-1,Gli3,Lhx3,Nkx6-2,Mnx1
8_Member	GO Biological Processes	GO:0021913	regulation of transcription from RNA polymerase II promoter involved in ventral spinal cord interneu	-2.20647	-1.11154	3/4	25509,65193,309095	Pax6,Nkx6-1,Nkx6-2
9_Summary	GO Biological Processes	GO:0071363	cellular response to growth factor stimulus	-17.6268	-14.6705	164/695	24225,24240,24329,24337,24373,24516,24577,24628,24954,25022,25129,25148,25164,25266,25267,25414,25444,25467,25495,25509,25628,25631,25661,29349,29560,29577,29609,50566,50594,50678,54251,54254,58822,58935,59106,59107,59323,59328,60443,60662,64018,64031,64462,64468,64566,64831,78963,79426,81504,81516,81527,81649,81653,81736,81809,81810,83476,83576,83727,83838,83840,84010,84489,84577,85421,85471,854…	Bdnf,Cad,Egfr,Erbb2,Fst,Jun,Myc,Pdgfb,Insr,Fgfr2,Egr4,Egr3,Cdkn2b,Pdgfa,Pdgfra,Bcar1,Fgf9,Irs1,Nog,Pax6,Nkx2-1,Smad3,Fn1,Fgf8,Hif1a,Hes1,Pitx3,Grem1,Nbl1,Pde3a,Flt1,Gata4,Csnk1e,Gas6,Ltbp2,Ltbp1,Erbb4,Smad5,Epn2,Fgf5,Slc33a1,Pdcd4,Csnk1d,Hyal2,Wnt5a,Ireb2,Apaf1,Zfp36,Grb2,Smad7,Nrp2,Mapk14,Dbn1,Nfkb1,Tgfb2,Tgfbr2,Cyr61,Sort1,Fbn1,Ltbp3,Rps6kb1,Dll1,Fgfr3,Hdac2,Prkd1,Gata3,Enpp1,Rab14,Megf8,Nkx2-5…
9_Member	GO Biological Processes	GO:0071363	cellular response to growth factor stimulus	-17.6268	-14.6705	164/695	24225,24240,24329,24337,24373,24516,24577,24628,24954,25022,25129,25148,25164,25266,25267,25414,25444,25467,25495,25509,25628,25631,25661,29349,29560,29577,29609,50566,50594,50678,54251,54254,58822,58935,59106,59107,59323,59328,60443,60662,64018,64031,64462,64468,64566,64831,78963,79426,81504,81516,81527,81649,81653,81736,81809,81810,83476,83576,83727,83838,83840,84010,84489,84577,85421,85471,854…	Bdnf,Cad,Egfr,Erbb2,Fst,Jun,Myc,Pdgfb,Insr,Fgfr2,Egr4,Egr3,Cdkn2b,Pdgfa,Pdgfra,Bcar1,Fgf9,Irs1,Nog,Pax6,Nkx2-1,Smad3,Fn1,Fgf8,Hif1a,Hes1,Pitx3,Grem1,Nbl1,Pde3a,Flt1,Gata4,Csnk1e,Gas6,Ltbp2,Ltbp1,Erbb4,Smad5,Epn2,Fgf5,Slc33a1,Pdcd4,Csnk1d,Hyal2,Wnt5a,Ireb2,Apaf1,Zfp36,Grb2,Smad7,Nrp2,Mapk14,Dbn1,Nfkb1,Tgfb2,Tgfbr2,Cyr61,Sort1,Fbn1,Ltbp3,Rps6kb1,Dll1,Fgfr3,Hdac2,Prkd1,Gata3,Enpp1,Rab14,Megf8,Nkx2-5…
9_Member	GO Biological Processes	GO:0070848	response to growth factor	-17.4708	-14.5559	170/733	24225,24240,24329,24337,24373,24516,24577,24628,24954,25022,25129,25148,25164,25266,25267,25327,25414,25444,25467,25495,25509,25513,25628,25631,25661,25663,29349,29560,29577,29609,50566,50594,50678,54251,54254,58822,58935,59106,59107,59323,59328,60443,60662,64018,64031,64462,64468,64566,64831,78963,79426,81504,81516,81527,81649,81653,81736,81809,81810,83476,83576,83727,83838,83840,84010,84489,845…	Bdnf,Cad,Egfr,Erbb2,Fst,Jun,Myc,Pdgfb,Insr,Fgfr2,Egr4,Egr3,Cdkn2b,Pdgfa,Pdgfra,Kcnc1,Bcar1,Fgf9,Irs1,Nog,Pax6,Pik3r1,Nkx2-1,Smad3,Fn1,Il1r1,Fgf8,Hif1a,Hes1,Pitx3,Grem1,Nbl1,Pde3a,Flt1,Gata4,Csnk1e,Gas6,Ltbp2,Ltbp1,Erbb4,Smad5,Epn2,Fgf5,Slc33a1,Pdcd4,Csnk1d,Hyal2,Wnt5a,Ireb2,Apaf1,Zfp36,Grb2,Smad7,Nrp2,Mapk14,Dbn1,Nfkb1,Tgfb2,Tgfbr2,Cyr61,Sort1,Fbn1,Ltbp3,Rps6kb1,Dll1,Fgfr3,Hdac2,Prkd1,Gata3,Enpp1…
9_Member	GO Biological Processes	GO:0007169	transmembrane receptor protein tyrosine kinase signaling pathway	-5.67719	-3.92771	103/550	24225,24329,24337,24628,24654,24680,24827,24954,25022,25266,25267,25414,25444,25467,25484,25495,25513,29349,29496,29560,29645,29741,50566,54251,58853,59114,59323,60443,60662,64457,64566,66023,78965,81504,81527,81649,83576,83840,84010,84482,84489,85421,85471,85496,94197,116499,116636,116671,116683,116777,117255,140942,170901,171287,171356,192126,192154,290905,291936,292130,292156,292925,294515,294…	Bdnf,Egfr,Erbb2,Pdgfb,Plcb1,Prkca,Tgfa,Insr,Fgfr2,Pdgfa,Pdgfra,Bcar1,Fgf9,Irs1,Myo1e,Nog,Pik3r1,Fgf8,Erbb3,Hif1a,Ptprj,Pik3r2,Grem1,Flt1,Nr4a3,Slc9a3r1,Erbb4,Epn2,Fgf5,Ndrg4,Wnt5a,Gfra4,Csf1,Grb2,Nrp2,Mapk14,Sort1,Rps6kb1,Dll1,Foxo1,Fgfr3,Prkd1,Gata3,Enpp1,Rab14,Fgf4,Eif4ebp1,Cdk5r1,Efna5,Cdh3,Ptpn12,Ddit4,Efna3,Epha7,Foxc2,Dab2ip,Hip1,Col4a1,Hhip,Afap1l2,Sh3glb1,Tsg101,Foxo3,Wasf1,Nampt,Trim71,C…
10_Summary	GO Biological Processes	GO:0048589	developmental growth	-17.5834	-14.6482	175/761	24170,24225,24318,24654,24695,24705,24883,24898,24925,24954,25022,25257,25267,25304,25416,25444,25495,25529,25631,25640,25661,29141,29349,29477,54254,54286,56718,58935,59312,59323,64353,64547,64566,65165,65193,66025,78957,78965,81527,81649,81653,81809,81810,81830,83467,83629,83718,83791,83807,83840,84010,84017,84023,84399,84489,84556,84577,84584,84609,85471,89816,89830,89843,93667,113912,114029,1…	Add1,Bdnf,Drd2,Plcb1,Pthlh,Rara,Wt1,Slc6a3,Adrb1,Insr,Fgfr2,Gamt,Pdgfra,Comp,Dpysl2,Fgf9,Nog,Ptprs,Smad3,Hnf1b,Fn1,Gal,Fgf8,Mapt,Gata4,Prkg1,Mtor,Gas6,Shank3,Erbb4,Pdlim5,Bcl2l11,Wnt5a,Tmed2,Nkx6-1,Lpar3,Shank1,Csf1,Nrp2,Mapk14,Dbn1,Tgfb2,Tgfbr2,Rab11a,Slit3,Slc12a2,Clic4,Fdps,Ybx3,Rps6kb1,Dll1,Hmga2,Ptger4,Ihh,Fgfr3,Rims1,Hdac2,Ncoa3,Sema6b,Gata3,Picalm,Ptch1,Cxadr,Olfm1,Rtn4r,Megf8,Nkx2-5,Wnt2,…
10_Member	GO Biological Processes	GO:0048589	developmental growth	-17.5834	-14.6482	175/761	24170,24225,24318,24654,24695,24705,24883,24898,24925,24954,25022,25257,25267,25304,25416,25444,25495,25529,25631,25640,25661,29141,29349,29477,54254,54286,56718,58935,59312,59323,64353,64547,64566,65165,65193,66025,78957,78965,81527,81649,81653,81809,81810,81830,83467,83629,83718,83791,83807,83840,84010,84017,84023,84399,84489,84556,84577,84584,84609,85471,89816,89830,89843,93667,113912,114029,1…	Add1,Bdnf,Drd2,Plcb1,Pthlh,Rara,Wt1,Slc6a3,Adrb1,Insr,Fgfr2,Gamt,Pdgfra,Comp,Dpysl2,Fgf9,Nog,Ptprs,Smad3,Hnf1b,Fn1,Gal,Fgf8,Mapt,Gata4,Prkg1,Mtor,Gas6,Shank3,Erbb4,Pdlim5,Bcl2l11,Wnt5a,Tmed2,Nkx6-1,Lpar3,Shank1,Csf1,Nrp2,Mapk14,Dbn1,Tgfb2,Tgfbr2,Rab11a,Slit3,Slc12a2,Clic4,Fdps,Ybx3,Rps6kb1,Dll1,Hmga2,Ptger4,Ihh,Fgfr3,Rims1,Hdac2,Ncoa3,Sema6b,Gata3,Picalm,Ptch1,Cxadr,Olfm1,Rtn4r,Megf8,Nkx2-5,Wnt2,…
10_Member	GO Biological Processes	GO:0048638	regulation of developmental growth	-14.0956	-11.4817	101/385	24225,24318,24654,24883,24898,24925,24954,25022,25257,25416,25444,25495,25529,25640,25661,29141,29349,29477,54254,56718,59323,64547,64566,65193,66025,78965,81649,81653,81810,81830,83791,83807,83840,84010,84017,84023,84489,84556,84577,84609,89816,89830,89843,93667,113912,114029,114109,114487,114523,114593,114634,116671,116683,117282,140941,170915,171287,171355,171356,171572,192189,291414,292156,29…	Bdnf,Drd2,Plcb1,Wt1,Slc6a3,Adrb1,Insr,Fgfr2,Gamt,Dpysl2,Fgf9,Nog,Ptprs,Hnf1b,Fn1,Gal,Fgf8,Mapt,Gata4,Mtor,Erbb4,Bcl2l11,Wnt5a,Nkx6-1,Lpar3,Csf1,Mapk14,Dbn1,Tgfbr2,Rab11a,Fdps,Ybx3,Rps6kb1,Dll1,Hmga2,Ptger4,Fgfr3,Rims1,Hdac2,Sema6b,Picalm,Ptch1,Cxadr,Olfm1,Rtn4r,Megf8,Nkx2-5,Wnt2,Ntn1,Nppc,Six1,Cdk5r1,Efna5,Hnrnpk,Siah1,Ep300,Epha7,Pou4f2,Foxc2,Ttl,Syt17,Ctdp1,Sh3glb1,Phlda2,Foxp1,Pin1,Six4,Cacna2…
10_Member	GO Biological Processes	GO:0040008	regulation of growth	-13.1962	-10.6948	152/698	24225,24318,24329,24337,24654,24883,24898,24925,24954,25022,25257,25416,25444,25495,25529,25621,25631,25640,25661,25664,25744,29141,29151,29349,29466,29477,29560,29645,50566,54254,56718,58935,59323,64468,64547,64566,65193,66025,78965,81649,81653,81809,81810,81830,83467,83476,83791,83807,83840,84010,84017,84023,84399,84489,84556,84577,84584,84609,85496,89816,89830,89843,93667,113912,114029,114109,…	Bdnf,Drd2,Egfr,Erbb2,Plcb1,Wt1,Slc6a3,Adrb1,Insr,Fgfr2,Gamt,Dpysl2,Fgf9,Nog,Ptprs,Cd81,Smad3,Hnf1b,Fn1,Pparg,Nf2,Gal,Ucn,Fgf8,Aes,Mapt,Hif1a,Ptprj,Grem1,Gata4,Mtor,Gas6,Erbb4,Hyal2,Bcl2l11,Wnt5a,Nkx6-1,Lpar3,Csf1,Mapk14,Dbn1,Tgfb2,Tgfbr2,Rab11a,Slit3,Cyr61,Fdps,Ybx3,Rps6kb1,Dll1,Hmga2,Ptger4,Ihh,Fgfr3,Rims1,Hdac2,Ncoa3,Sema6b,Enpp1,Picalm,Ptch1,Cxadr,Olfm1,Rtn4r,Megf8,Nkx2-5,Wnt2,Ntn1,Nppc,Six1,C…
10_Member	GO Biological Processes	GO:0016049	cell growth	-7.68632	-5.6938	104/508	24225,24329,24337,24883,24925,25416,25529,25631,25661,25664,25744,29141,29151,29477,29645,50566,54254,54286,56718,64353,64468,64566,65193,66025,81527,81653,81809,81810,81830,83467,83476,83791,84556,84584,84609,85496,89816,93667,113912,114029,114523,114700,114851,116456,116671,116683,116724,116743,117282,140584,161452,170897,170915,171073,171287,171355,171572,192126,192189,291414,292156,292925,294…	Bdnf,Egfr,Erbb2,Wt1,Adrb1,Dpysl2,Ptprs,Smad3,Fn1,Pparg,Nf2,Gal,Ucn,Mapt,Ptprj,Grem1,Gata4,Prkg1,Mtor,Pdlim5,Hyal2,Wnt5a,Nkx6-1,Lpar3,Nrp2,Dbn1,Tgfb2,Tgfbr2,Rab11a,Slit3,Cyr61,Fdps,Rims1,Ncoa3,Sema6b,Enpp1,Picalm,Olfm1,Rtn4r,Megf8,Ntn1,Cyp27b1,Cdkn1a,Dnajc2,Cdk5r1,Efna5,Epb41l3,Sh3gl2,Hnrnpk,Wnt11,Lef1,Sphk1,Ep300,Hdgfl2,Epha7,Pou4f2,Ttl,Dab2ip,Syt17,Ctdp1,Sh3glb1,Tsg101,Sesn1,Wasf1,Foxp1,Ncbp1,Pi…
10_Member	GO Biological Processes	GO:0045926	negative regulation of growth	-7.30138	-5.35154	66/282	24883,24925,25495,25529,25631,25664,25744,29141,29560,29645,50566,64468,64566,81809,81810,83467,84489,84577,84609,85496,89830,89843,113912,114523,114700,114851,116456,116671,140584,171287,192126,291414,294518,297480,300514,301346,303039,303181,303188,303206,303836,303901,304017,304514,305589,308739,309377,310552,310553,312936,314621,316539,360992,364952,365460,498423,498630,499108,502916,502988,6…	Wt1,Adrb1,Nog,Ptprs,Smad3,Pparg,Nf2,Gal,Hif1a,Ptprj,Grem1,Hyal2,Wnt5a,Tgfb2,Tgfbr2,Slit3,Fgfr3,Hdac2,Sema6b,Enpp1,Ptch1,Cxadr,Rtn4r,Ntn1,Cyp27b1,Cdkn1a,Dnajc2,Cdk5r1,Wnt11,Epha7,Dab2ip,Ctdp1,Sesn1,Foxp1,Ei24,Sema4c,Wwc1,Wnt3a,Rai1,Ulk2,Bcl6,Sema5b,Tomm70,Tbx5,Bcl11a,Rgma,Sfrp5,Sfrp2,Tlr2,Sox17,Stk11,Epha4,Pnpt1,Nkd1,Tll2,Sertad2,Wwc2,Sertad3,Rerg,Sesn2,Tcf7l2,Jarid2,Gas1,Meis1,Caprin2,Mapk11
10_Member	GO Biological Processes	GO:0001558	regulation of cell growth	-7.04999	-5.14289	90/433	24225,24329,24337,24883,24925,25416,25529,25631,25661,25664,25744,29141,29151,29477,29645,50566,56718,64468,64566,65193,66025,81653,81809,81830,83467,83476,83791,84556,84584,84609,85496,89816,93667,113912,114029,114523,114700,114851,116456,116671,116683,116724,117282,140584,161452,170897,170915,171073,171287,171355,171572,192126,192189,291414,292156,292925,294518,297480,298075,298696,300514,30134…	Bdnf,Egfr,Erbb2,Wt1,Adrb1,Dpysl2,Ptprs,Smad3,Fn1,Pparg,Nf2,Gal,Ucn,Mapt,Ptprj,Grem1,Mtor,Hyal2,Wnt5a,Nkx6-1,Lpar3,Dbn1,Tgfb2,Rab11a,Slit3,Cyr61,Fdps,Rims1,Ncoa3,Sema6b,Enpp1,Picalm,Olfm1,Rtn4r,Megf8,Ntn1,Cyp27b1,Cdkn1a,Dnajc2,Cdk5r1,Efna5,Epb41l3,Hnrnpk,Wnt11,Lef1,Sphk1,Ep300,Hdgfl2,Epha7,Pou4f2,Ttl,Dab2ip,Syt17,Ctdp1,Sh3glb1,Tsg101,Sesn1,Foxp1,Ncbp1,Pin1,Ei24,Sema4c,Tnfrsf12a,Wnt3a,Ulk2,Bcl6,Sem…
10_Member	GO Biological Processes	GO:0048639	positive regulation of developmental growth	-6.12764	-4.33119	50/207	24225,24318,24654,24883,24898,24925,24954,25022,25444,25661,29349,29477,54254,56718,59323,66025,78965,81649,81653,81810,81830,83791,83807,83840,84010,84017,84023,84556,89816,114029,114487,114523,116683,117282,170915,171355,192189,292156,298696,300992,302965,303181,304514,305501,305589,308458,312974,501069,679028,690516	Bdnf,Drd2,Plcb1,Wt1,Slc6a3,Adrb1,Insr,Fgfr2,Fgf9,Fn1,Fgf8,Mapt,Gata4,Mtor,Erbb4,Lpar3,Csf1,Mapk14,Dbn1,Tgfbr2,Rab11a,Fdps,Ybx3,Rps6kb1,Dll1,Hmga2,Ptger4,Rims1,Picalm,Megf8,Wnt2,Ntn1,Efna5,Hnrnpk,Ep300,Pou4f2,Syt17,Sh3glb1,Pin1,Cacna2d2,Tnfrsf12a,Wnt3a,Tbx5,Ikzf1,Bcl11a,Sptbn4,Chd7,Golga4,Rbpj,Smurf1
10_Member	GO Biological Processes	GO:0045927	positive regulation of growth	-5.9654	-4.18518	64/293	24225,24318,24329,24337,24654,24883,24898,24925,24954,25022,25444,25661,29151,29349,29477,54254,56718,59323,66025,78965,81649,81653,81809,81810,81830,83791,83807,83840,84010,84017,84023,84556,84584,89816,114029,114487,114523,116683,117282,161452,170897,170915,171073,171355,192189,292156,298075,298696,300992,302965,303181,304495,304514,305501,305589,308458,308896,310552,312974,501069,679028,683504…	Bdnf,Drd2,Egfr,Erbb2,Plcb1,Wt1,Slc6a3,Adrb1,Insr,Fgfr2,Fgf9,Fn1,Ucn,Fgf8,Mapt,Gata4,Mtor,Erbb4,Lpar3,Csf1,Mapk14,Dbn1,Tgfb2,Tgfbr2,Rab11a,Fdps,Ybx3,Rps6kb1,Dll1,Hmga2,Ptger4,Rims1,Ncoa3,Picalm,Megf8,Wnt2,Ntn1,Efna5,Hnrnpk,Lef1,Sphk1,Ep300,Hdgfl2,Pou4f2,Syt17,Sh3glb1,Ncbp1,Pin1,Cacna2d2,Tnfrsf12a,Wnt3a,Kdm2b,Tbx5,Ikzf1,Bcl11a,Sptbn4,Usp47,Sfrp2,Chd7,Golga4,Rbpj,Zfp639,Smurf1,Slc25a33
10_Member	GO Biological Processes	GO:0030308	negative regulation of cell growth	-4.96605	-3.31233	45/196	24883,25529,25631,25664,25744,29141,29645,50566,64468,64566,81809,83467,84609,85496,113912,114523,114700,114851,116456,116671,140584,171287,192126,291414,294518,297480,300514,301346,303181,303206,303836,303901,304017,305589,308739,310552,312936,314621,316539,498423,499108,502916,502988,683470,686779	Wt1,Ptprs,Smad3,Pparg,Nf2,Gal,Ptprj,Grem1,Hyal2,Wnt5a,Tgfb2,Slit3,Sema6b,Enpp1,Rtn4r,Ntn1,Cyp27b1,Cdkn1a,Dnajc2,Cdk5r1,Wnt11,Epha7,Dab2ip,Ctdp1,Sesn1,Foxp1,Ei24,Sema4c,Wnt3a,Ulk2,Bcl6,Sema5b,Tomm70,Bcl11a,Rgma,Sfrp2,Sox17,Stk11,Epha4,Sertad2,Sertad3,Rerg,Sesn2,Gas1,Caprin2
10_Member	GO Biological Processes	GO:0030307	positive regulation of cell growth	-3.65813	-2.2409	39/183	24225,24329,24337,24925,25661,29151,29477,56718,66025,81653,81809,81830,83791,84556,84584,89816,114029,114523,116683,117282,161452,170897,170915,171073,171355,192189,292156,298075,298696,302965,303181,304495,305589,308896,310552,501069,683504,690516,691431	Bdnf,Egfr,Erbb2,Adrb1,Fn1,Ucn,Mapt,Mtor,Lpar3,Dbn1,Tgfb2,Rab11a,Fdps,Rims1,Ncoa3,Picalm,Megf8,Ntn1,Efna5,Hnrnpk,Lef1,Sphk1,Ep300,Hdgfl2,Pou4f2,Syt17,Sh3glb1,Ncbp1,Pin1,Tnfrsf12a,Wnt3a,Kdm2b,Bcl11a,Usp47,Sfrp2,Golga4,Zfp639,Smurf1,Slc25a33
11_Summary	GO Biological Processes	GO:0000904	cell morphogenesis involved in differentiation	-16.4461	-13.6038	171/756	24225,24245,24318,24337,24408,24587,24674,24680,25022,25275,25398,25414,25415,25416,25495,25509,25529,25546,25558,25576,25603,25628,25661,25696,25715,29227,29349,29457,29477,29496,29577,29616,50677,54239,58853,59114,59312,60328,60329,64353,64566,64571,64666,65178,65193,66025,78957,79433,81527,81634,81653,81677,81809,81822,81830,83466,83467,83501,83718,83720,84399,84407,84489,84609,85471,89816,898…	Bdnf,Camk2b,Drd2,Erbb2,Grin1,Nefh,Ppp3ca,Prkca,Fgfr2,Cnp,Cacna1a,Bcar1,Crmp1,Dpysl2,Nog,Pax6,Ptprs,Shox2,Stxbp1,Ywhah,Marcks,Nkx2-1,Fn1,Vldlr,Slc11a2,Nfib,Fgf8,Map6,Mapt,Erbb3,Hes1,Ptprm,Ptpro,Chrnb2,Nr4a3,Slc9a3r1,Shank3,Mark2,Neurog3,Pdlim5,Wnt5a,Vax1,Taok2,Snap91,Nkx6-1,Lpar3,Shank1,Myh10,Nrp2,Actn1,Dbn1,Itpka,Tgfb2,Actb,Rab11a,Celsr3,Slit3,Cdh2,Clic4,Fat1,Ihh,Cdh11,Fgfr3,Sema6b,Gata3,Picalm,P…
11_Member	GO Biological Processes	GO:0000904	cell morphogenesis involved in differentiation	-16.4461	-13.6038	171/756	24225,24245,24318,24337,24408,24587,24674,24680,25022,25275,25398,25414,25415,25416,25495,25509,25529,25546,25558,25576,25603,25628,25661,25696,25715,29227,29349,29457,29477,29496,29577,29616,50677,54239,58853,59114,59312,60328,60329,64353,64566,64571,64666,65178,65193,66025,78957,79433,81527,81634,81653,81677,81809,81822,81830,83466,83467,83501,83718,83720,84399,84407,84489,84609,85471,89816,898…	Bdnf,Camk2b,Drd2,Erbb2,Grin1,Nefh,Ppp3ca,Prkca,Fgfr2,Cnp,Cacna1a,Bcar1,Crmp1,Dpysl2,Nog,Pax6,Ptprs,Shox2,Stxbp1,Ywhah,Marcks,Nkx2-1,Fn1,Vldlr,Slc11a2,Nfib,Fgf8,Map6,Mapt,Erbb3,Hes1,Ptprm,Ptpro,Chrnb2,Nr4a3,Slc9a3r1,Shank3,Mark2,Neurog3,Pdlim5,Wnt5a,Vax1,Taok2,Snap91,Nkx6-1,Lpar3,Shank1,Myh10,Nrp2,Actn1,Dbn1,Itpka,Tgfb2,Actb,Rab11a,Celsr3,Slit3,Cdh2,Clic4,Fat1,Ihh,Cdh11,Fgfr3,Sema6b,Gata3,Picalm,P…
11_Member	GO Biological Processes	GO:0048812	neuron projection morphogenesis	-15.9303	-13.15	151/645	24225,24245,24318,24329,24337,24408,24587,24674,24680,25022,25275,25398,25415,25416,25495,25509,25529,25546,25558,25576,25603,25628,25661,25696,25715,29227,29349,29457,29477,29496,29616,50594,50677,54239,58823,58853,59312,60328,60329,64353,64566,64571,64666,65178,65193,66025,78957,79433,81527,81653,81677,81809,81822,81830,83466,83467,83501,84407,84489,84556,84609,85246,85471,89816,89830,93667,113…	Bdnf,Camk2b,Drd2,Egfr,Erbb2,Grin1,Nefh,Ppp3ca,Prkca,Fgfr2,Cnp,Cacna1a,Crmp1,Dpysl2,Nog,Pax6,Ptprs,Shox2,Stxbp1,Ywhah,Marcks,Nkx2-1,Fn1,Vldlr,Slc11a2,Nfib,Fgf8,Map6,Mapt,Erbb3,Ptprm,Nbl1,Ptpro,Chrnb2,Nckap1,Nr4a3,Shank3,Mark2,Neurog3,Pdlim5,Wnt5a,Vax1,Taok2,Snap91,Nkx6-1,Lpar3,Shank1,Myh10,Nrp2,Dbn1,Itpka,Tgfb2,Actb,Rab11a,Celsr3,Slit3,Cdh2,Cdh11,Fgfr3,Rims1,Sema6b,Gas7,Gata3,Picalm,Ptch1,Olfm1,Rt…
11_Member	GO Biological Processes	GO:0120039	plasma membrane bounded cell projection morphogenesis	-15.3695	-12.6645	152/660	24225,24245,24318,24329,24337,24408,24587,24674,24680,25022,25275,25398,25415,25416,25495,25509,25529,25546,25558,25576,25603,25628,25661,25696,25715,29227,29349,29457,29477,29496,29616,50594,50677,54239,58823,58853,59312,60328,60329,64353,64566,64571,64666,65178,65193,66025,78957,79433,81527,81653,81677,81809,81822,81830,83466,83467,83501,84407,84489,84556,84609,85246,85471,89816,89830,93667,113…	Bdnf,Camk2b,Drd2,Egfr,Erbb2,Grin1,Nefh,Ppp3ca,Prkca,Fgfr2,Cnp,Cacna1a,Crmp1,Dpysl2,Nog,Pax6,Ptprs,Shox2,Stxbp1,Ywhah,Marcks,Nkx2-1,Fn1,Vldlr,Slc11a2,Nfib,Fgf8,Map6,Mapt,Erbb3,Ptprm,Nbl1,Ptpro,Chrnb2,Nckap1,Nr4a3,Shank3,Mark2,Neurog3,Pdlim5,Wnt5a,Vax1,Taok2,Snap91,Nkx6-1,Lpar3,Shank1,Myh10,Nrp2,Dbn1,Itpka,Tgfb2,Actb,Rab11a,Celsr3,Slit3,Cdh2,Cdh11,Fgfr3,Rims1,Sema6b,Gas7,Gata3,Picalm,Ptch1,Olfm1,Rt…
11_Member	GO Biological Processes	GO:0032990	cell part morphogenesis	-15.3655	-12.6645	156/684	24225,24245,24318,24329,24337,24408,24587,24674,24680,25022,25275,25398,25415,25416,25495,25509,25529,25546,25558,25576,25603,25628,25661,25696,25715,29227,29349,29457,29477,29496,29616,50594,50677,54239,58823,58853,59312,60328,60329,64353,64566,64571,64666,65178,65193,66025,78957,79433,81527,81653,81677,81809,81822,81830,83466,83467,83501,84407,84489,84556,84609,85246,85471,89816,89830,93667,113…	Bdnf,Camk2b,Drd2,Egfr,Erbb2,Grin1,Nefh,Ppp3ca,Prkca,Fgfr2,Cnp,Cacna1a,Crmp1,Dpysl2,Nog,Pax6,Ptprs,Shox2,Stxbp1,Ywhah,Marcks,Nkx2-1,Fn1,Vldlr,Slc11a2,Nfib,Fgf8,Map6,Mapt,Erbb3,Ptprm,Nbl1,Ptpro,Chrnb2,Nckap1,Nr4a3,Shank3,Mark2,Neurog3,Pdlim5,Wnt5a,Vax1,Taok2,Snap91,Nkx6-1,Lpar3,Shank1,Myh10,Nrp2,Dbn1,Itpka,Tgfb2,Actb,Rab11a,Celsr3,Slit3,Cdh2,Cdh11,Fgfr3,Rims1,Sema6b,Gas7,Gata3,Picalm,Ptch1,Olfm1,Rt…
11_Member	GO Biological Processes	GO:0048858	cell projection morphogenesis	-15.2483	-12.5592	152/662	24225,24245,24318,24329,24337,24408,24587,24674,24680,25022,25275,25398,25415,25416,25495,25509,25529,25546,25558,25576,25603,25628,25661,25696,25715,29227,29349,29457,29477,29496,29616,50594,50677,54239,58823,58853,59312,60328,60329,64353,64566,64571,64666,65178,65193,66025,78957,79433,81527,81653,81677,81809,81822,81830,83466,83467,83501,84407,84489,84556,84609,85246,85471,89816,89830,93667,113…	Bdnf,Camk2b,Drd2,Egfr,Erbb2,Grin1,Nefh,Ppp3ca,Prkca,Fgfr2,Cnp,Cacna1a,Crmp1,Dpysl2,Nog,Pax6,Ptprs,Shox2,Stxbp1,Ywhah,Marcks,Nkx2-1,Fn1,Vldlr,Slc11a2,Nfib,Fgf8,Map6,Mapt,Erbb3,Ptprm,Nbl1,Ptpro,Chrnb2,Nckap1,Nr4a3,Shank3,Mark2,Neurog3,Pdlim5,Wnt5a,Vax1,Taok2,Snap91,Nkx6-1,Lpar3,Shank1,Myh10,Nrp2,Dbn1,Itpka,Tgfb2,Actb,Rab11a,Celsr3,Slit3,Cdh2,Cdh11,Fgfr3,Rims1,Sema6b,Gas7,Gata3,Picalm,Ptch1,Olfm1,Rt…
11_Member	GO Biological Processes	GO:0048667	cell morphogenesis involved in neuron differentiation	-14.9327	-12.2551	139/590	24225,24245,24318,24337,24408,24587,24674,24680,25022,25275,25398,25415,25416,25495,25509,25529,25546,25558,25576,25603,25628,25661,25696,25715,29227,29349,29457,29477,29496,29577,29616,50677,54239,58853,59114,59312,60328,60329,64353,64566,64571,64666,65178,65193,66025,78957,79433,81527,81653,81677,81809,81822,81830,83466,83467,83501,84407,84489,84609,85471,89816,89830,93667,113912,114029,114208,…	Bdnf,Camk2b,Drd2,Erbb2,Grin1,Nefh,Ppp3ca,Prkca,Fgfr2,Cnp,Cacna1a,Crmp1,Dpysl2,Nog,Pax6,Ptprs,Shox2,Stxbp1,Ywhah,Marcks,Nkx2-1,Fn1,Vldlr,Slc11a2,Nfib,Fgf8,Map6,Mapt,Erbb3,Hes1,Ptprm,Ptpro,Chrnb2,Nr4a3,Slc9a3r1,Shank3,Mark2,Neurog3,Pdlim5,Wnt5a,Vax1,Taok2,Snap91,Nkx6-1,Lpar3,Shank1,Myh10,Nrp2,Dbn1,Itpka,Tgfb2,Actb,Rab11a,Celsr3,Slit3,Cdh2,Cdh11,Fgfr3,Sema6b,Gata3,Picalm,Ptch1,Olfm1,Rtn4r,Megf8,Skil…
11_Member	GO Biological Processes	GO:0045664	regulation of neuron differentiation	-14.5013	-11.8567	166/760	24166,24174,24225,24245,24336,24388,24408,24674,24705,24929,25099,25398,25415,25416,25418,25509,25529,25546,25576,25585,25603,25661,25696,29146,29457,29477,29497,29577,50594,54239,54276,56718,58822,58840,58950,59312,60328,60329,60584,64353,64457,64532,64566,65178,65193,66025,66026,78957,79121,81653,81677,81830,83501,83619,84010,84556,84577,84609,85421,85471,89816,93667,113912,114029,114109,114208…	Adcyap1,Adra2b,Bdnf,Camk2b,Epor,Gfi1,Grin1,Ppp3ca,Rara,Ptger3,Foxa2,Cacna1a,Crmp1,Dpysl2,Dpysl3,Pax6,Ptprs,Shox2,Ywhah,Id3,Marcks,Fn1,Vldlr,Jag1,Map6,Mapt,Ptbp1,Hes1,Nbl1,Chrnb2,Neurod2,Mtor,Csnk1e,Mapk6,Fkbp1b,Shank3,Mark2,Neurog3,Lif,Pdlim5,Ndrg4,Adcy5,Wnt5a,Snap91,Nkx6-1,Lpar3,Trpv4,Shank1,Arf6,Dbn1,Itpka,Rab11a,Cdh2,Nfe2l2,Dll1,Rims1,Hdac2,Sema6b,Prkd1,Gata3,Picalm,Olfm1,Rtn4r,Megf8,Nkx2-5,Sk…
11_Member	GO Biological Processes	GO:0007409	axonogenesis	-14.4472	-11.8131	111/436	24225,24318,24337,24408,24587,24680,25022,25275,25398,25415,25416,25495,25509,25529,25546,25558,25628,25661,29227,29349,29457,29477,29496,29616,50677,54239,58853,60328,64566,64571,64666,65178,65193,66025,79433,81527,81653,81809,81822,81830,83466,83467,83501,84407,84489,84609,85471,89816,89830,93667,113912,114029,114208,114486,114523,116671,116683,116690,140588,156726,170671,170901,170915,171287,1…	Bdnf,Drd2,Erbb2,Grin1,Nefh,Prkca,Fgfr2,Cnp,Cacna1a,Crmp1,Dpysl2,Nog,Pax6,Ptprs,Shox2,Stxbp1,Nkx2-1,Fn1,Nfib,Fgf8,Map6,Mapt,Erbb3,Ptprm,Ptpro,Chrnb2,Nr4a3,Mark2,Wnt5a,Vax1,Taok2,Snap91,Nkx6-1,Lpar3,Myh10,Nrp2,Dbn1,Tgfb2,Actb,Rab11a,Celsr3,Slit3,Cdh2,Cdh11,Fgfr3,Sema6b,Gata3,Picalm,Ptch1,Olfm1,Rtn4r,Megf8,Skil,Braf,Ntn1,Cdk5r1,Efna5,Nfasc,Gli3,Runx3,Lhx3,Efna3,Ep300,Epha7,Foxd1,Pou4f2,Ttl,Syngap1,N…
11_Member	GO Biological Processes	GO:0061564	axon development	-13.3522	-10.8352	116/480	24225,24318,24337,24408,24516,24587,24680,25022,25275,25398,25415,25416,25495,25509,25529,25546,25558,25628,25661,29227,29349,29457,29477,29496,29616,50677,54239,58853,58950,60328,64566,64571,64666,65178,65193,66025,79433,81527,81653,81809,81822,81830,83466,83467,83501,84407,84468,84489,84609,85471,89816,89830,93667,113912,114029,114208,114486,114523,116671,116683,116690,140588,156726,170671,1709…	Bdnf,Drd2,Erbb2,Grin1,Jun,Nefh,Prkca,Fgfr2,Cnp,Cacna1a,Crmp1,Dpysl2,Nog,Pax6,Ptprs,Shox2,Stxbp1,Nkx2-1,Fn1,Nfib,Fgf8,Map6,Mapt,Erbb3,Ptprm,Ptpro,Chrnb2,Nr4a3,Fkbp1b,Mark2,Wnt5a,Vax1,Taok2,Snap91,Nkx6-1,Lpar3,Myh10,Nrp2,Dbn1,Tgfb2,Actb,Rab11a,Celsr3,Slit3,Cdh2,Cdh11,Chst3,Fgfr3,Sema6b,Gata3,Picalm,Ptch1,Olfm1,Rtn4r,Megf8,Skil,Braf,Ntn1,Cdk5r1,Efna5,Nfasc,Gli3,Runx3,Lhx3,Efna3,Ep300,Epha7,Foxd1,Pou…
11_Member	GO Biological Processes	GO:0051962	positive regulation of nervous system development	-11.83	-9.45919	136/625	24166,24174,24225,24245,24318,24336,24577,24680,24705,25099,25418,25478,25495,25509,25546,25603,25661,25663,25664,25696,29457,29477,29497,29560,29577,29609,50594,54251,54276,56718,58822,58840,58950,59312,60328,60329,60584,64457,64566,65178,65193,66025,78957,78965,81653,81677,81749,81830,83619,83684,84556,84577,85238,85421,89816,114029,114109,114208,114486,114523,116639,116683,116744,117096,117282…	Adcyap1,Adra2b,Bdnf,Camk2b,Drd2,Epor,Myc,Prkca,Rara,Foxa2,Dpysl3,Man2a1,Nog,Pax6,Shox2,Marcks,Fn1,Il1r1,Pparg,Vldlr,Map6,Mapt,Ptbp1,Hif1a,Hes1,Pitx3,Nbl1,Flt1,Neurod2,Mtor,Csnk1e,Mapk6,Fkbp1b,Shank3,Mark2,Neurog3,Lif,Ndrg4,Wnt5a,Snap91,Nkx6-1,Lpar3,Shank1,Csf1,Dbn1,Itpka,Prkch,Rab11a,Nfe2l2,Tpbg,Rims1,Hdac2,Synj1,Prkd1,Picalm,Megf8,Nkx2-5,Skil,Braf,Ntn1,Cux1,Efna5,Lpar1,Nlgn2,Hnrnpk,Baiap2,Lhx5,G…
11_Member	GO Biological Processes	GO:0010720	positive regulation of cell development	-11.7323	-9.36702	137/633	24166,24170,24174,24225,24245,24318,24336,24577,24705,24925,25099,25418,25478,25495,25509,25546,25603,25661,25663,25664,25696,29415,29457,29477,29497,29560,29577,50594,50678,54251,54276,56718,58822,58840,58950,59312,60328,60329,60584,64457,64566,65178,65193,66025,78957,78965,78969,81653,81677,81749,81830,83619,83791,84556,84577,85238,85421,89816,114029,114109,114208,114486,114523,116639,116683,11…	Adcyap1,Add1,Adra2b,Bdnf,Camk2b,Drd2,Epor,Myc,Rara,Adrb1,Foxa2,Dpysl3,Man2a1,Nog,Pax6,Shox2,Marcks,Fn1,Il1r1,Pparg,Vldlr,S1pr2,Map6,Mapt,Ptbp1,Hif1a,Hes1,Nbl1,Pde3a,Flt1,Neurod2,Mtor,Csnk1e,Mapk6,Fkbp1b,Shank3,Mark2,Neurog3,Lif,Ndrg4,Wnt5a,Snap91,Nkx6-1,Lpar3,Shank1,Csf1,Trib1,Dbn1,Itpka,Prkch,Rab11a,Nfe2l2,Fdps,Rims1,Hdac2,Synj1,Prkd1,Picalm,Megf8,Nkx2-5,Skil,Braf,Ntn1,Cux1,Efna5,Lpar1,Nlgn2,Hnr…
11_Member	GO Biological Processes	GO:0050769	positive regulation of neurogenesis	-11.4815	-9.14839	124/558	24166,24174,24225,24245,24318,24336,24577,24705,25099,25418,25478,25495,25509,25546,25603,25661,25663,25664,25696,29457,29477,29497,29560,29577,50594,54251,54276,56718,58822,58840,58950,59312,60328,60329,60584,64457,64566,65178,65193,66025,78957,78965,81653,81677,81749,81830,83619,84556,84577,85238,85421,89816,114029,114109,114208,114486,114523,116639,116683,116744,117096,117282,117542,140588,170…	Adcyap1,Adra2b,Bdnf,Camk2b,Drd2,Epor,Myc,Rara,Foxa2,Dpysl3,Man2a1,Nog,Pax6,Shox2,Marcks,Fn1,Il1r1,Pparg,Vldlr,Map6,Mapt,Ptbp1,Hif1a,Hes1,Nbl1,Flt1,Neurod2,Mtor,Csnk1e,Mapk6,Fkbp1b,Shank3,Mark2,Neurog3,Lif,Ndrg4,Wnt5a,Snap91,Nkx6-1,Lpar3,Shank1,Csf1,Dbn1,Itpka,Prkch,Rab11a,Nfe2l2,Rims1,Hdac2,Synj1,Prkd1,Picalm,Megf8,Nkx2-5,Skil,Braf,Ntn1,Cux1,Efna5,Lpar1,Nlgn2,Hnrnpk,Baiap2,Gli3,Sphk1,Ep300,Pou4f2…
11_Member	GO Biological Processes	GO:0060560	developmental growth involved in morphogenesis	-11.0902	-8.80597	72/264	24225,24695,25022,25416,25529,25640,25661,29141,29477,64566,65193,66025,78965,81527,81653,81810,81830,83467,83629,84556,84609,89816,93667,113912,114029,114523,114634,116671,116683,116743,117282,140584,170915,171287,171355,171572,192189,288154,289229,292156,294568,299117,299138,301252,301346,302965,303113,303181,303206,303901,304809,305012,305589,306141,307740,308739,308766,309377,310552,311860,31…	Bdnf,Pthlh,Fgfr2,Dpysl2,Ptprs,Hnf1b,Fn1,Gal,Mapt,Wnt5a,Nkx6-1,Lpar3,Csf1,Nrp2,Dbn1,Tgfbr2,Rab11a,Slit3,Slc12a2,Rims1,Sema6b,Picalm,Olfm1,Rtn4r,Megf8,Ntn1,Six1,Cdk5r1,Efna5,Sh3gl2,Hnrnpk,Wnt11,Ep300,Epha7,Pou4f2,Ttl,Syt17,Hoxd13,Vangl2,Sh3glb1,Wasf1,Nin,Six4,Hsp90ab1,Sema4c,Tnfrsf12a,Jade2,Wnt3a,Ulk2,Sema5b,Kdm5b,Kif26b,Bcl11a,Spry2,Sall1,Rgma,Mesp1,Sfrp5,Sfrp2,Abl1,RGD1359108,Stk11,Tmtc3,Wnt7b,Ep…
11_Member	GO Biological Processes	GO:0010975	regulation of neuron projection development	-10.3633	-8.10597	125/585	24166,24225,24245,24336,24388,24408,24674,25398,25415,25416,25418,25509,25529,25546,25576,25603,25661,25696,29457,29477,29497,29577,54239,56718,58840,58950,59312,60328,60329,60584,64353,64457,64532,64566,65178,65193,66025,66026,78957,79121,81653,81677,81830,83501,83619,84556,84577,84609,85421,85471,89816,93667,113912,114029,114208,114486,114523,116639,116671,116683,116744,117096,117282,117542,170…	Adcyap1,Bdnf,Camk2b,Epor,Gfi1,Grin1,Ppp3ca,Cacna1a,Crmp1,Dpysl2,Dpysl3,Pax6,Ptprs,Shox2,Ywhah,Marcks,Fn1,Vldlr,Map6,Mapt,Ptbp1,Hes1,Chrnb2,Mtor,Mapk6,Fkbp1b,Shank3,Mark2,Neurog3,Lif,Pdlim5,Ndrg4,Adcy5,Wnt5a,Snap91,Nkx6-1,Lpar3,Trpv4,Shank1,Arf6,Dbn1,Itpka,Rab11a,Cdh2,Nfe2l2,Rims1,Hdac2,Sema6b,Prkd1,Gata3,Picalm,Olfm1,Rtn4r,Megf8,Skil,Braf,Ntn1,Cux1,Cdk5r1,Efna5,Lpar1,Nlgn2,Hnrnpk,Baiap2,Sphk1,Ep3…
11_Member	GO Biological Processes	GO:0045666	positive regulation of neuron differentiation	-9.2077	-7.05073	100/453	24166,24174,24225,24245,24336,24705,25099,25418,25509,25546,25603,25661,25696,29457,29477,29497,50594,54276,56718,58822,58840,58950,59312,60328,60329,60584,64457,64566,65178,65193,66025,78957,81653,81677,81830,83619,84556,85421,89816,114029,114109,114208,114486,114523,116639,116683,116744,117096,117282,117542,170897,170915,171355,192126,192189,252833,252834,289392,292156,293056,293692,294674,2953…	Adcyap1,Adra2b,Bdnf,Camk2b,Epor,Rara,Foxa2,Dpysl3,Pax6,Shox2,Marcks,Fn1,Vldlr,Map6,Mapt,Ptbp1,Nbl1,Neurod2,Mtor,Csnk1e,Mapk6,Fkbp1b,Shank3,Mark2,Neurog3,Lif,Ndrg4,Wnt5a,Snap91,Nkx6-1,Lpar3,Shank1,Dbn1,Itpka,Rab11a,Nfe2l2,Rims1,Prkd1,Picalm,Megf8,Nkx2-5,Skil,Braf,Ntn1,Cux1,Efna5,Lpar1,Nlgn2,Hnrnpk,Baiap2,Sphk1,Ep300,Pou4f2,Dab2ip,Syt17,Gdf7,Gdf6,Plxna2,Sh3glb1,Cpeb1,Ehd1,Enc1,Rap1a,Dlx2,Nin,Tmem30…
11_Member	GO Biological Processes	GO:0022604	regulation of cell morphogenesis	-8.50617	-6.4278	108/516	24225,24245,24408,24674,24851,25398,25414,25416,25464,25529,25546,25576,25603,25661,29457,29477,50685,54239,59114,59312,60328,60329,64353,64373,64566,64666,65178,65193,66025,79433,81008,81653,81677,81830,83501,84556,84609,85246,89816,93667,113912,114029,114208,114486,114523,116639,116671,116683,116724,116744,117282,117542,170915,171287,171355,171572,192117,192189,246174,287433,289392,292156,29467…	Bdnf,Camk2b,Grin1,Ppp3ca,Tpm1,Cacna1a,Bcar1,Dpysl2,Icam1,Ptprs,Shox2,Ywhah,Marcks,Fn1,Map6,Mapt,Myl12b,Chrnb2,Slc9a3r1,Shank3,Mark2,Neurog3,Pdlim5,Rhob,Wnt5a,Taok2,Snap91,Nkx6-1,Lpar3,Myh10,Itga7,Dbn1,Itpka,Rab11a,Cdh2,Rims1,Sema6b,Gas7,Picalm,Olfm1,Rtn4r,Megf8,Skil,Braf,Ntn1,Cux1,Cdk5r1,Efna5,Epb41l3,Lpar1,Hnrnpk,Baiap2,Ep300,Epha7,Pou4f2,Ttl,Syngap1,Syt17,Fgd4,Fxr2,Plxna2,Sh3glb1,Hexb,Sh3d19,Rn…
11_Member	GO Biological Processes	GO:0007411	axon guidance	-8.39256	-6.32834	56/210	24225,24337,25415,25416,25495,25509,25628,29227,29349,29616,50677,58853,64566,64571,79433,81527,81809,83466,83467,84609,85471,89830,114029,114523,116671,116683,116690,140588,156726,170671,170901,171287,171299,171355,192183,252833,266715,289229,289392,297480,299907,301346,303181,303901,305719,311024,313633,315196,316539,360635,361096,361517,361833,493574,682076,683470	Bdnf,Erbb2,Crmp1,Dpysl2,Nog,Pax6,Nkx2-1,Nfib,Fgf8,Ptprm,Ptpro,Nr4a3,Wnt5a,Vax1,Myh10,Nrp2,Tgfb2,Celsr3,Slit3,Sema6b,Gata3,Ptch1,Megf8,Ntn1,Cdk5r1,Efna5,Nfasc,Gli3,Runx3,Lhx3,Efna3,Epha7,Foxd1,Pou4f2,Nectin1,Gdf7,Fzd3,Vangl2,Plxna2,Foxp1,Ext1,Sema4c,Wnt3a,Sema5b,Fezf2,Kif5c,Ephb2,Wnt7b,Epha4,Etv4,Zic2,Vasp,Ank3,Ispd,Mnx1,Gas1
11_Member	GO Biological Processes	GO:0097485	neuron projection guidance	-8.31158	-6.25564	56/211	24225,24337,25415,25416,25495,25509,25628,29227,29349,29616,50677,58853,64566,64571,79433,81527,81809,83466,83467,84609,85471,89830,114029,114523,116671,116683,116690,140588,156726,170671,170901,171287,171299,171355,192183,252833,266715,289229,289392,297480,299907,301346,303181,303901,305719,311024,313633,315196,316539,360635,361096,361517,361833,493574,682076,683470	Bdnf,Erbb2,Crmp1,Dpysl2,Nog,Pax6,Nkx2-1,Nfib,Fgf8,Ptprm,Ptpro,Nr4a3,Wnt5a,Vax1,Myh10,Nrp2,Tgfb2,Celsr3,Slit3,Sema6b,Gata3,Ptch1,Megf8,Ntn1,Cdk5r1,Efna5,Nfasc,Gli3,Runx3,Lhx3,Efna3,Epha7,Foxd1,Pou4f2,Nectin1,Gdf7,Fzd3,Vangl2,Plxna2,Foxp1,Ext1,Sema4c,Wnt3a,Sema5b,Fezf2,Kif5c,Ephb2,Wnt7b,Epha4,Etv4,Zic2,Vasp,Ank3,Ispd,Mnx1,Gas1
11_Member	GO Biological Processes	GO:0031344	regulation of cell projection organization	-7.99414	-5.97233	147/781	24166,24225,24245,24336,24388,24408,24674,25398,25415,25416,25418,25464,25509,25529,25546,25576,25603,25661,25696,29457,29477,29497,29577,54239,56227,56718,58823,58840,58950,59312,60328,60329,60584,64353,64457,64532,64566,65178,65193,66025,66026,78957,79121,81653,81677,81830,83501,83619,84556,84577,84609,85421,85471,89816,93667,113912,114029,114208,114486,114523,116639,116671,116677,116683,116744…	Adcyap1,Bdnf,Camk2b,Epor,Gfi1,Grin1,Ppp3ca,Cacna1a,Crmp1,Dpysl2,Dpysl3,Icam1,Pax6,Ptprs,Shox2,Ywhah,Marcks,Fn1,Vldlr,Map6,Mapt,Ptbp1,Hes1,Chrnb2,Espn,Mtor,Nckap1,Mapk6,Fkbp1b,Shank3,Mark2,Neurog3,Lif,Pdlim5,Ndrg4,Adcy5,Wnt5a,Snap91,Nkx6-1,Lpar3,Trpv4,Shank1,Arf6,Dbn1,Itpka,Rab11a,Cdh2,Nfe2l2,Rims1,Hdac2,Sema6b,Prkd1,Gata3,Picalm,Olfm1,Rtn4r,Megf8,Skil,Braf,Ntn1,Cux1,Cdk5r1,F2rl1,Efna5,Lpar1,Nlgn2…
11_Member	GO Biological Processes	GO:0120035	regulation of plasma membrane bounded cell projection organization	-7.83197	-5.82748	145/772	24166,24225,24245,24336,24388,24408,24674,25398,25415,25416,25418,25464,25509,25529,25546,25576,25603,25661,25696,29457,29477,29497,29577,54239,56227,56718,58823,58840,58950,59312,60328,60329,60584,64353,64457,64532,64566,65178,65193,66025,66026,78957,79121,81653,81677,81830,83501,83619,84556,84577,84609,85421,85471,89816,93667,113912,114029,114208,114486,114523,116639,116671,116677,116683,116744…	Adcyap1,Bdnf,Camk2b,Epor,Gfi1,Grin1,Ppp3ca,Cacna1a,Crmp1,Dpysl2,Dpysl3,Icam1,Pax6,Ptprs,Shox2,Ywhah,Marcks,Fn1,Vldlr,Map6,Mapt,Ptbp1,Hes1,Chrnb2,Espn,Mtor,Nckap1,Mapk6,Fkbp1b,Shank3,Mark2,Neurog3,Lif,Pdlim5,Ndrg4,Adcy5,Wnt5a,Snap91,Nkx6-1,Lpar3,Trpv4,Shank1,Arf6,Dbn1,Itpka,Rab11a,Cdh2,Nfe2l2,Rims1,Hdac2,Sema6b,Prkd1,Gata3,Picalm,Olfm1,Rtn4r,Megf8,Skil,Braf,Ntn1,Cux1,Cdk5r1,F2rl1,Efna5,Lpar1,Nlgn2…
11_Member	GO Biological Processes	GO:0010769	regulation of cell morphogenesis involved in differentiation	-7.22681	-5.28753	76/343	24225,24245,24408,24674,25398,25414,25416,25529,25546,25576,25603,25661,29457,29477,54239,59312,60328,60329,64353,64566,65178,65193,66025,81653,81677,81830,83501,84609,89816,93667,113912,114029,114208,114486,114523,116639,116671,116683,117542,170915,171287,171355,171572,192117,287433,289392,292156,299117,301309,301346,302965,303181,303206,303901,305589,305719,305987,306873,308739,309081,310533,31…	Bdnf,Camk2b,Grin1,Ppp3ca,Cacna1a,Bcar1,Dpysl2,Ptprs,Shox2,Ywhah,Marcks,Fn1,Map6,Mapt,Chrnb2,Shank3,Mark2,Neurog3,Pdlim5,Wnt5a,Snap91,Nkx6-1,Lpar3,Dbn1,Itpka,Rab11a,Cdh2,Sema6b,Picalm,Olfm1,Rtn4r,Megf8,Skil,Braf,Ntn1,Cux1,Cdk5r1,Efna5,Baiap2,Ep300,Epha7,Pou4f2,Ttl,Syngap1,Fxr2,Plxna2,Sh3glb1,Nin,Adgrb3,Sema4c,Tnfrsf12a,Wnt3a,Ulk2,Sema5b,Bcl11a,Fezf2,Dock5,Rreb1,Rgma,Dock1,Rapgef2,Abl1,Ephb2,Stk11,…
11_Member	GO Biological Processes	GO:0010976	positive regulation of neuron projection development	-7.18129	-5.25002	78/356	24166,24225,24245,24336,25418,25546,25603,25661,25696,29457,29477,29497,56718,58840,58950,59312,60328,60584,64457,64566,65178,66025,78957,81653,81677,81830,83619,84556,85421,89816,114029,114208,114486,114523,116639,116683,116744,117096,117282,117542,170897,170915,171355,192126,192189,289392,292156,293056,293692,294674,295347,299117,300857,302965,303181,303811,305589,307938,308578,308739,309459,31…	Adcyap1,Bdnf,Camk2b,Epor,Dpysl3,Shox2,Marcks,Fn1,Vldlr,Map6,Mapt,Ptbp1,Mtor,Mapk6,Fkbp1b,Shank3,Mark2,Lif,Ndrg4,Wnt5a,Snap91,Lpar3,Shank1,Dbn1,Itpka,Rab11a,Nfe2l2,Rims1,Prkd1,Picalm,Megf8,Skil,Braf,Ntn1,Cux1,Efna5,Lpar1,Nlgn2,Hnrnpk,Baiap2,Sphk1,Ep300,Pou4f2,Dab2ip,Syt17,Plxna2,Sh3glb1,Cpeb1,Ehd1,Enc1,Rap1a,Nin,Tmem30a,Tnfrsf12a,Wnt3a,Dvl3,Bcl11a,Trim67,Ap2a1,Rgma,Neurl1,Rapgef2,Plppr5,Abl1,Ezh2,…
11_Member	GO Biological Processes	GO:0031346	positive regulation of cell projection organization	-6.52835	-4.69261	92/457	24166,24225,24245,24336,24408,25418,25546,25603,25661,25696,29457,29477,29497,56227,56718,58823,58840,58950,59312,60328,60584,64457,64566,65178,66025,78957,81653,81677,81830,83619,84556,85421,89816,114029,114208,114486,114523,116639,116677,116683,116744,117096,117282,117542,170897,170915,171355,192126,192189,266688,289392,292156,293056,293621,293692,294674,295347,299117,300857,302965,303181,30381…	Adcyap1,Bdnf,Camk2b,Epor,Grin1,Dpysl3,Shox2,Marcks,Fn1,Vldlr,Map6,Mapt,Ptbp1,Espn,Mtor,Nckap1,Mapk6,Fkbp1b,Shank3,Mark2,Lif,Ndrg4,Wnt5a,Snap91,Lpar3,Shank1,Dbn1,Itpka,Rab11a,Nfe2l2,Rims1,Prkd1,Picalm,Megf8,Skil,Braf,Ntn1,Cux1,F2rl1,Efna5,Lpar1,Nlgn2,Hnrnpk,Baiap2,Sphk1,Ep300,Pou4f2,Dab2ip,Syt17,Rab8b,Plxna2,Sh3glb1,Cpeb1,Hras,Ehd1,Enc1,Rap1a,Nin,Tmem30a,Tnfrsf12a,Wnt3a,Dvl3,Tapt1,Bcl11a,Ccdc88a,R…
11_Member	GO Biological Processes	GO:0048588	developmental cell growth	-6.47593	-4.64672	60/260	24225,24925,25416,25529,25661,29141,29477,54254,54286,56718,64353,64566,65193,66025,81527,81653,81810,81830,83467,83791,84556,84609,89816,93667,113912,114029,114523,116671,116683,116743,117282,170915,171287,171355,171572,192189,291414,292156,294568,297480,298696,299117,301252,301346,302965,303113,303181,303206,303901,304017,305589,308739,311860,313155,314621,316539,363239,367152,501069,690516	Bdnf,Adrb1,Dpysl2,Ptprs,Fn1,Gal,Mapt,Gata4,Prkg1,Mtor,Pdlim5,Wnt5a,Nkx6-1,Lpar3,Nrp2,Dbn1,Tgfbr2,Rab11a,Slit3,Fdps,Rims1,Sema6b,Picalm,Olfm1,Rtn4r,Megf8,Ntn1,Cdk5r1,Efna5,Sh3gl2,Hnrnpk,Ep300,Epha7,Pou4f2,Ttl,Syt17,Ctdp1,Sh3glb1,Wasf1,Foxp1,Pin1,Nin,Hsp90ab1,Sema4c,Tnfrsf12a,Jade2,Wnt3a,Ulk2,Sema5b,Tomm70,Bcl11a,Rgma,Abl1,RGD1359108,Stk11,Epha4,Raph1,Foxl2,Golga4,Smurf1
11_Member	GO Biological Processes	GO:0050770	regulation of axonogenesis	-6.1949	-4.39088	50/206	24225,24408,25398,25416,25529,25546,25661,29457,29477,60328,64566,65178,65193,66025,81653,81830,83501,84609,89816,93667,113912,114029,114208,114486,114523,116671,116683,170915,171287,171355,171572,192117,289392,299117,301346,302965,303181,303206,303901,305589,305719,308739,311860,313633,314621,316539,361450,363062,501069,690516	Bdnf,Grin1,Cacna1a,Dpysl2,Ptprs,Shox2,Fn1,Map6,Mapt,Mark2,Wnt5a,Snap91,Nkx6-1,Lpar3,Dbn1,Rab11a,Cdh2,Sema6b,Picalm,Olfm1,Rtn4r,Megf8,Skil,Braf,Ntn1,Cdk5r1,Efna5,Ep300,Epha7,Pou4f2,Ttl,Syngap1,Plxna2,Nin,Sema4c,Tnfrsf12a,Wnt3a,Ulk2,Sema5b,Bcl11a,Fezf2,Rgma,Abl1,Ephb2,Stk11,Epha4,Ust,Dixdc1,Golga4,Smurf1
11_Member	GO Biological Processes	GO:0008361	regulation of cell size	-4.84883	-3.21782	48/216	24170,24225,25416,25529,25661,29151,29477,29560,56718,59114,59312,64566,65193,66025,81653,81830,83629,84360,84609,93667,113912,114029,114523,116671,116683,170915,171287,171355,171373,171572,296603,301252,301346,302965,303181,303206,303901,305589,308739,311846,311860,312927,313020,314979,315655,316539,501069,690516	Add1,Bdnf,Dpysl2,Ptprs,Fn1,Ucn,Mapt,Hif1a,Mtor,Slc9a3r1,Shank3,Wnt5a,Nkx6-1,Lpar3,Dbn1,Rab11a,Slc12a2,Clcn3,Sema6b,Olfm1,Rtn4r,Megf8,Ntn1,Cdk5r1,Efna5,Ep300,Epha7,Pou4f2,Slc12a5,Ttl,Vav2,Hsp90ab1,Sema4c,Tnfrsf12a,Wnt3a,Ulk2,Sema5b,Bcl11a,Rgma,Lrrc8a,Abl1,Rb1cc1,Wdtc1,Deptor,Rdx,Epha4,Golga4,Smurf1
11_Member	GO Biological Processes	GO:0061387	regulation of extent of cell growth	-4.47349	-2.89347	32/128	24225,25416,25529,25661,29477,64566,65193,66025,81653,81830,84609,93667,113912,114029,114523,116671,116683,170915,171287,171355,171572,301346,302965,303181,303206,303901,305589,308739,311860,316539,501069,690516	Bdnf,Dpysl2,Ptprs,Fn1,Mapt,Wnt5a,Nkx6-1,Lpar3,Dbn1,Rab11a,Sema6b,Olfm1,Rtn4r,Megf8,Ntn1,Cdk5r1,Efna5,Ep300,Epha7,Pou4f2,Ttl,Sema4c,Tnfrsf12a,Wnt3a,Ulk2,Sema5b,Bcl11a,Rgma,Abl1,Epha4,Golga4,Smurf1
11_Member	GO Biological Processes	GO:1990138	neuron projection extension	-4.21383	-2.67582	42/191	24225,25416,25529,25661,29477,64566,65193,81527,81653,81830,83467,84556,84609,89816,93667,113912,114029,114523,116671,116743,117282,170915,171355,171572,192189,292156,294568,301252,301346,302965,303113,303181,303206,303901,305589,311860,313155,314621,316539,363239,501069,690516	Bdnf,Dpysl2,Ptprs,Fn1,Mapt,Wnt5a,Nkx6-1,Nrp2,Dbn1,Rab11a,Slit3,Rims1,Sema6b,Picalm,Olfm1,Rtn4r,Megf8,Ntn1,Cdk5r1,Sh3gl2,Hnrnpk,Ep300,Pou4f2,Ttl,Syt17,Sh3glb1,Wasf1,Hsp90ab1,Sema4c,Tnfrsf12a,Jade2,Wnt3a,Ulk2,Sema5b,Bcl11a,Abl1,RGD1359108,Stk11,Epha4,Raph1,Golga4,Smurf1
11_Member	GO Biological Processes	GO:0010770	positive regulation of cell morphogenesis involved in differentiation	-4.09421	-2.57644	40/181	24225,24245,25546,25603,25661,29457,29477,65178,66025,81653,81677,81830,89816,114029,114208,114486,114523,116639,116683,117542,170915,171355,289392,292156,299117,302965,303181,305589,305987,306873,309081,311860,314621,316539,363062,363259,499443,501069,686779,100911248	Bdnf,Camk2b,Shox2,Marcks,Fn1,Map6,Mapt,Snap91,Lpar3,Dbn1,Itpka,Rab11a,Picalm,Megf8,Skil,Braf,Ntn1,Cux1,Efna5,Baiap2,Ep300,Pou4f2,Plxna2,Sh3glb1,Nin,Tnfrsf12a,Wnt3a,Bcl11a,Dock5,Rreb1,Dock1,Abl1,Stk11,Epha4,Dixdc1,Obsl1,Lims1,Golga4,Caprin2,LOC100911248
11_Member	GO Biological Processes	GO:0048675	axon extension	-3.80341	-2.35969	32/138	24225,25416,25529,25661,29477,64566,65193,81527,81653,81830,83467,84609,93667,113912,114029,114523,116671,170915,171355,171572,301252,301346,302965,303181,303206,303901,311860,313155,316539,363239,501069,690516	Bdnf,Dpysl2,Ptprs,Fn1,Mapt,Wnt5a,Nkx6-1,Nrp2,Dbn1,Rab11a,Slit3,Sema6b,Olfm1,Rtn4r,Megf8,Ntn1,Cdk5r1,Ep300,Pou4f2,Ttl,Hsp90ab1,Sema4c,Tnfrsf12a,Wnt3a,Ulk2,Sema5b,Abl1,RGD1359108,Epha4,Raph1,Golga4,Smurf1
11_Member	GO Biological Processes	GO:0042330	taxis	-3.70745	-2.28134	91/528	24225,24337,24628,24680,25148,25266,25267,25414,25415,25416,25495,25509,25628,25631,25661,29227,29349,29616,29645,50566,50594,50677,54251,58853,58935,64566,64571,66026,78965,79433,81527,81649,81809,83466,83467,83476,84609,85421,85471,89830,89843,114029,114523,116499,116671,116677,116683,116690,116744,117096,140588,156726,161452,170671,170901,171287,171299,171355,192183,252833,266715,287647,288615…	Bdnf,Erbb2,Pdgfb,Prkca,Egr3,Pdgfa,Pdgfra,Bcar1,Crmp1,Dpysl2,Nog,Pax6,Nkx2-1,Smad3,Fn1,Nfib,Fgf8,Ptprm,Ptprj,Grem1,Nbl1,Ptpro,Flt1,Nr4a3,Gas6,Wnt5a,Vax1,Trpv4,Csf1,Myh10,Nrp2,Mapk14,Tgfb2,Celsr3,Slit3,Cyr61,Sema6b,Prkd1,Gata3,Ptch1,Cxadr,Megf8,Ntn1,Fgf4,Cdk5r1,F2rl1,Efna5,Nfasc,Lpar1,Nlgn2,Gli3,Runx3,Lef1,Lhx3,Efna3,Epha7,Foxd1,Pou4f2,Nectin1,Gdf7,Fzd3,Hoxb9,Sbds,Vangl2,Plxna2,Itgav,Foxp1,Ext1,Sem…
11_Member	GO Biological Processes	GO:0050772	positive regulation of axonogenesis	-3.70591	-2.28044	25/99	24225,25546,25661,29457,29477,65178,66025,81653,81830,89816,114029,114208,114486,114523,116683,170915,171355,289392,299117,302965,303181,305589,314621,363062,501069	Bdnf,Shox2,Fn1,Map6,Mapt,Snap91,Lpar3,Dbn1,Rab11a,Picalm,Megf8,Skil,Braf,Ntn1,Efna5,Ep300,Pou4f2,Plxna2,Nin,Tnfrsf12a,Wnt3a,Bcl11a,Stk11,Dixdc1,Golga4
11_Member	GO Biological Processes	GO:0006935	chemotaxis	-3.56417	-2.16005	90/526	24225,24337,24628,24680,25148,25266,25267,25414,25415,25416,25495,25509,25628,25631,25661,29227,29349,29616,29645,50566,50594,50677,54251,58853,58935,64566,64571,66026,78965,79433,81527,81649,81809,83466,83467,83476,84609,85421,85471,89830,89843,114029,114523,116499,116671,116677,116683,116690,116744,140588,156726,161452,170671,170901,171287,171299,171355,192183,252833,266715,287647,288615,289229…	Bdnf,Erbb2,Pdgfb,Prkca,Egr3,Pdgfa,Pdgfra,Bcar1,Crmp1,Dpysl2,Nog,Pax6,Nkx2-1,Smad3,Fn1,Nfib,Fgf8,Ptprm,Ptprj,Grem1,Nbl1,Ptpro,Flt1,Nr4a3,Gas6,Wnt5a,Vax1,Trpv4,Csf1,Myh10,Nrp2,Mapk14,Tgfb2,Celsr3,Slit3,Cyr61,Sema6b,Prkd1,Gata3,Ptch1,Cxadr,Megf8,Ntn1,Fgf4,Cdk5r1,F2rl1,Efna5,Nfasc,Lpar1,Gli3,Runx3,Lef1,Lhx3,Efna3,Epha7,Foxd1,Pou4f2,Nectin1,Gdf7,Fzd3,Hoxb9,Sbds,Vangl2,Plxna2,Itgav,Foxp1,Ext1,Sema4c,Wn…
11_Member	GO Biological Processes	GO:0030516	regulation of axon extension	-3.1515	-1.83067	26/113	24225,25416,25529,25661,29477,64566,65193,81653,81830,84609,93667,113912,114029,114523,116671,170915,171355,171572,301346,302965,303181,303901,311860,316539,501069,690516	Bdnf,Dpysl2,Ptprs,Fn1,Mapt,Wnt5a,Nkx6-1,Dbn1,Rab11a,Sema6b,Olfm1,Rtn4r,Megf8,Ntn1,Cdk5r1,Ep300,Pou4f2,Ttl,Sema4c,Tnfrsf12a,Wnt3a,Sema5b,Abl1,Epha4,Golga4,Smurf1
12_Summary	GO Biological Processes	GO:0007507	heart development	-16.1838	-13.3578	151/641	24240,24329,24336,24337,24516,24628,24672,24705,24851,24883,24925,24954,25022,25267,25444,25495,25546,25585,25603,25631,25664,25696,29146,29349,29496,29497,29560,29577,29645,29748,50566,54254,54284,54286,56718,58823,59107,59323,59329,64026,64031,64353,64457,64532,64566,65165,79433,81516,81527,81649,81666,81728,81809,81810,83476,83727,83791,84010,84399,84577,85471,85490,89830,89843,93667,114029,11…	Cad,Egfr,Epor,Erbb2,Jun,Pdgfb,Ppp2ca,Rara,Tpm1,Wt1,Adrb1,Insr,Fgfr2,Pdgfra,Fgf9,Nog,Shox2,Id3,Marcks,Smad3,Pparg,Vldlr,Jag1,Fgf8,Erbb3,Ptbp1,Hif1a,Hes1,Ptprj,Ppp3r1,Grem1,Gata4,Pitx2,Prkg1,Mtor,Nckap1,Ltbp1,Erbb4,Sik1,Casp7,Pdcd4,Pdlim5,Ndrg4,Adcy5,Wnt5a,Tmed2,Myh10,Smad7,Nrp2,Mapk14,Gnaq,Ndufv2,Tgfb2,Tgfbr2,Cyr61,Fbn1,Fdps,Dll1,Ihh,Hdac2,Gata3,Col5a1,Ptch1,Cxadr,Olfm1,Megf8,Nkx2-5,Wnt2,Pax3,Six1…
12_Member	GO Biological Processes	GO:0007507	heart development	-16.1838	-13.3578	151/641	24240,24329,24336,24337,24516,24628,24672,24705,24851,24883,24925,24954,25022,25267,25444,25495,25546,25585,25603,25631,25664,25696,29146,29349,29496,29497,29560,29577,29645,29748,50566,54254,54284,54286,56718,58823,59107,59323,59329,64026,64031,64353,64457,64532,64566,65165,79433,81516,81527,81649,81666,81728,81809,81810,83476,83727,83791,84010,84399,84577,85471,85490,89830,89843,93667,114029,11…	Cad,Egfr,Epor,Erbb2,Jun,Pdgfb,Ppp2ca,Rara,Tpm1,Wt1,Adrb1,Insr,Fgfr2,Pdgfra,Fgf9,Nog,Shox2,Id3,Marcks,Smad3,Pparg,Vldlr,Jag1,Fgf8,Erbb3,Ptbp1,Hif1a,Hes1,Ptprj,Ppp3r1,Grem1,Gata4,Pitx2,Prkg1,Mtor,Nckap1,Ltbp1,Erbb4,Sik1,Casp7,Pdcd4,Pdlim5,Ndrg4,Adcy5,Wnt5a,Tmed2,Myh10,Smad7,Nrp2,Mapk14,Gnaq,Ndufv2,Tgfb2,Tgfbr2,Cyr61,Fbn1,Fdps,Dll1,Ihh,Hdac2,Gata3,Col5a1,Ptch1,Cxadr,Olfm1,Megf8,Nkx2-5,Wnt2,Pax3,Six1…
12_Member	GO Biological Processes	GO:0003007	heart morphogenesis	-12.8499	-10.3876	74/255	24516,24705,24851,24954,25022,25495,25546,25631,29146,29349,29560,29577,54254,54284,56718,64031,64566,65165,81516,81527,81809,81810,83476,84010,84399,85471,85490,89830,93667,114029,114109,114487,114634,140584,171356,287867,289229,296201,303181,303811,303968,304514,306862,307594,308376,308766,310341,310552,311332,312936,312974,313845,313922,314856,353305,360737,360903,361103,361700,362934,363259,3…	Jun,Rara,Tpm1,Insr,Fgfr2,Nog,Shox2,Smad3,Jag1,Fgf8,Hif1a,Hes1,Gata4,Pitx2,Mtor,Pdcd4,Wnt5a,Tmed2,Smad7,Nrp2,Tgfb2,Tgfbr2,Cyr61,Dll1,Ihh,Gata3,Col5a1,Ptch1,Olfm1,Megf8,Nkx2-5,Wnt2,Six1,Wnt11,Foxc2,Ccdc40,Vangl2,Ovol2,Wnt3a,Dvl3,Ift57,Tbx5,Tfap2a,Mib1,Adgrg6,Mesp1,Fat4,Sfrp2,Dll4,Sox17,Chd7,Sos1,Asxl2,Mdm2,Tbx3,Tbx1,Fgfrl1,Zmiz1,Kdm2a,Ly6e,Obsl1,Cluap1,Foxc1,Sox4,Mical2,Col4a3bp,Gaa,Pkd2,Lbx1,Rbpj,…
12_Member	GO Biological Processes	GO:0035050	embryonic heart tube development	-8.57777	-6.48811	30/79	25631,29349,29560,29577,54254,58823,64566,65165,81810,84010,84399,114029,114109,171356,287867,289229,296201,303181,303968,307594,308766,312936,353305,361700,363544,364418,364706,365352,498328,499362	Smad3,Fgf8,Hif1a,Hes1,Gata4,Nckap1,Wnt5a,Tmed2,Tgfbr2,Dll1,Ihh,Megf8,Nkx2-5,Foxc2,Ccdc40,Vangl2,Ovol2,Wnt3a,Ift57,Mib1,Mesp1,Sox17,Tbx3,Kdm2a,Cluap1,Nkx2-6,Foxc1,Mical2,Pkd2,Lbx1
12_Member	GO Biological Processes	GO:0003143	embryonic heart tube morphogenesis	-8.24816	-6.19494	26/64	25631,29349,29560,29577,54254,64566,65165,81810,84010,84399,114029,114109,287867,289229,296201,303181,303968,307594,308766,312936,353305,361700,363544,365352,498328,499362	Smad3,Fgf8,Hif1a,Hes1,Gata4,Wnt5a,Tmed2,Tgfbr2,Dll1,Ihh,Megf8,Nkx2-5,Ccdc40,Vangl2,Ovol2,Wnt3a,Ift57,Mib1,Mesp1,Sox17,Tbx3,Kdm2a,Cluap1,Mical2,Pkd2,Lbx1
12_Member	GO Biological Processes	GO:0001947	heart looping	-8.03174	-6.00485	24/57	25631,29349,29560,54254,64566,65165,81810,84010,84399,114109,287867,289229,296201,303181,303968,307594,308766,312936,353305,361700,363544,365352,498328,499362	Smad3,Fgf8,Hif1a,Gata4,Wnt5a,Tmed2,Tgfbr2,Dll1,Ihh,Nkx2-5,Ccdc40,Vangl2,Ovol2,Wnt3a,Ift57,Mib1,Mesp1,Sox17,Tbx3,Kdm2a,Cluap1,Mical2,Pkd2,Lbx1
12_Member	GO Biological Processes	GO:0061371	determination of heart left/right asymmetry	-7.70995	-5.71505	25/63	25631,29349,29560,54254,64566,65165,81810,84010,84399,114029,114109,287867,289229,296201,303181,303968,307594,308766,312936,353305,361700,363544,365352,498328,499362	Smad3,Fgf8,Hif1a,Gata4,Wnt5a,Tmed2,Tgfbr2,Dll1,Ihh,Megf8,Nkx2-5,Ccdc40,Vangl2,Ovol2,Wnt3a,Ift57,Mib1,Mesp1,Sox17,Tbx3,Kdm2a,Cluap1,Mical2,Pkd2,Lbx1
12_Member	GO Biological Processes	GO:0009855	determination of bilateral symmetry	-4.593	-2.99439	33/132	25631,29349,29560,50566,50594,54254,54284,64566,65165,81810,84010,84399,114029,114109,287867,289229,296201,303181,303968,307594,308766,312936,353305,360737,361096,361700,363111,363544,364993,365352,498328,499362,100359595	Smad3,Fgf8,Hif1a,Grem1,Nbl1,Gata4,Pitx2,Wnt5a,Tmed2,Tgfbr2,Dll1,Ihh,Megf8,Nkx2-5,Ccdc40,Vangl2,Ovol2,Wnt3a,Ift57,Mib1,Mesp1,Sox17,Tbx3,Tbx1,Zic2,Kdm2a,Ripply2,Cluap1,Pskh1,Mical2,Pkd2,Lbx1,Tbc1d32
12_Member	GO Biological Processes	GO:0009799	specification of symmetry	-4.52135	-2.93518	33/133	25631,29349,29560,50566,50594,54254,54284,64566,65165,81810,84010,84399,114029,114109,287867,289229,296201,303181,303968,307594,308766,312936,353305,360737,361096,361700,363111,363544,364993,365352,498328,499362,100359595	Smad3,Fgf8,Hif1a,Grem1,Nbl1,Gata4,Pitx2,Wnt5a,Tmed2,Tgfbr2,Dll1,Ihh,Megf8,Nkx2-5,Ccdc40,Vangl2,Ovol2,Wnt3a,Ift57,Mib1,Mesp1,Sox17,Tbx3,Tbx1,Zic2,Kdm2a,Ripply2,Cluap1,Pskh1,Mical2,Pkd2,Lbx1,Tbc1d32
12_Member	GO Biological Processes	GO:0007368	determination of left/right symmetry	-4.4267	-2.8551	31/123	25631,29349,29560,54254,54284,64566,65165,81810,84010,84399,114029,114109,287867,289229,296201,303181,303968,307594,308766,312936,353305,360737,361096,361700,363111,363544,364993,365352,498328,499362,100359595	Smad3,Fgf8,Hif1a,Gata4,Pitx2,Wnt5a,Tmed2,Tgfbr2,Dll1,Ihh,Megf8,Nkx2-5,Ccdc40,Vangl2,Ovol2,Wnt3a,Ift57,Mib1,Mesp1,Sox17,Tbx3,Tbx1,Zic2,Kdm2a,Ripply2,Cluap1,Pskh1,Mical2,Pkd2,Lbx1,Tbc1d32
13_Summary	GO Biological Processes	GO:0061061	muscle structure development	-15.7895	-13.0236	155/671	24225,24337,24577,24628,24654,24674,24705,24771,24851,24883,24925,25022,25084,25216,25267,25444,25495,25513,25546,25585,25631,25675,29154,29349,29496,29497,29577,29619,29657,50566,54254,54284,54286,56718,58814,59323,59329,60584,64031,64353,64566,64571,79433,81008,81516,81634,81649,81809,81810,83501,83514,83576,83791,83807,83840,84010,84577,89843,113983,113984,114109,114208,114487,114502,114634,11…	Bdnf,Erbb2,Myc,Pdgfb,Plcb1,Ppp3ca,Rara,Sdc4,Tpm1,Wt1,Adrb1,Fgfr2,Il4r,Sdc1,Pdgfra,Fgf9,Nog,Pik3r1,Shox2,Id3,Smad3,Hmgcr,Capn2,Fgf8,Erbb3,Ptbp1,Hes1,Btg2,Arntl,Grem1,Gata4,Pitx2,Prkg1,Mtor,Tmod2,Erbb4,Sik1,Lif,Pdcd4,Pdlim5,Wnt5a,Vax1,Myh10,Itga7,Smad7,Actn1,Mapk14,Tgfb2,Tgfbr2,Cdh2,Tsc22d3,Sort1,Fdps,Ybx3,Rps6kb1,Dll1,Hdac2,Cxadr,Pitx1,Nr2f2,Nkx2-5,Skil,Wnt2,Pax3,Six1,Bhlhe41,Hnrnpu,Lama5,Lef1,Ep3…
13_Member	GO Biological Processes	GO:0061061	muscle structure development	-15.7895	-13.0236	155/671	24225,24337,24577,24628,24654,24674,24705,24771,24851,24883,24925,25022,25084,25216,25267,25444,25495,25513,25546,25585,25631,25675,29154,29349,29496,29497,29577,29619,29657,50566,54254,54284,54286,56718,58814,59323,59329,60584,64031,64353,64566,64571,79433,81008,81516,81634,81649,81809,81810,83501,83514,83576,83791,83807,83840,84010,84577,89843,113983,113984,114109,114208,114487,114502,114634,11…	Bdnf,Erbb2,Myc,Pdgfb,Plcb1,Ppp3ca,Rara,Sdc4,Tpm1,Wt1,Adrb1,Fgfr2,Il4r,Sdc1,Pdgfra,Fgf9,Nog,Pik3r1,Shox2,Id3,Smad3,Hmgcr,Capn2,Fgf8,Erbb3,Ptbp1,Hes1,Btg2,Arntl,Grem1,Gata4,Pitx2,Prkg1,Mtor,Tmod2,Erbb4,Sik1,Lif,Pdcd4,Pdlim5,Wnt5a,Vax1,Myh10,Itga7,Smad7,Actn1,Mapk14,Tgfb2,Tgfbr2,Cdh2,Tsc22d3,Sort1,Fdps,Ybx3,Rps6kb1,Dll1,Hdac2,Cxadr,Pitx1,Nr2f2,Nkx2-5,Skil,Wnt2,Pax3,Six1,Bhlhe41,Hnrnpu,Lama5,Lef1,Ep3…
13_Member	GO Biological Processes	GO:0060537	muscle tissue development	-13.4876	-10.9546	112/455	24225,24337,24577,24674,24705,24851,24883,24925,25022,25267,25444,25495,25546,25603,25631,25675,29349,29496,29619,29657,50566,54254,54284,54286,56718,59323,59329,64353,64566,64571,79433,81008,81516,81634,81649,81728,81809,81810,83514,83791,83807,83840,84010,84399,84577,89843,113983,113984,114109,114208,114487,114634,117280,161452,170915,171356,246768,261736,282635,287765,289144,291414,297480,2978…	Bdnf,Erbb2,Myc,Ppp3ca,Rara,Tpm1,Wt1,Adrb1,Fgfr2,Pdgfra,Fgf9,Nog,Shox2,Marcks,Smad3,Hmgcr,Fgf8,Erbb3,Btg2,Arntl,Grem1,Gata4,Pitx2,Prkg1,Mtor,Erbb4,Sik1,Pdlim5,Wnt5a,Vax1,Myh10,Itga7,Smad7,Actn1,Mapk14,Ndufv2,Tgfb2,Tgfbr2,Tsc22d3,Fdps,Ybx3,Rps6kb1,Dll1,Ihh,Hdac2,Cxadr,Pitx1,Nr2f2,Nkx2-5,Skil,Wnt2,Six1,Hnrnpu,Lef1,Ep300,Foxc2,Cby1,Cops2,Mbnl1,Ddx5,Cacybp,Ctdp1,Foxp1,Arid1a,Pin1,Osr1,Six4,Wnt3a,Tomm7…
13_Member	GO Biological Processes	GO:0014706	striated muscle tissue development	-13.2187	-10.7095	108/436	24225,24337,24577,24674,24705,24851,24883,24925,25022,25267,25444,25495,25546,25603,25631,25675,29349,29496,29619,29657,50566,54254,54284,54286,56718,59323,59329,64353,64566,64571,79433,81008,81516,81634,81649,81728,81809,81810,83514,83791,83807,83840,84010,84577,89843,113983,113984,114109,114208,114487,114634,117280,161452,170915,171356,246768,261736,282635,287765,289144,291414,297480,297867,298…	Bdnf,Erbb2,Myc,Ppp3ca,Rara,Tpm1,Wt1,Adrb1,Fgfr2,Pdgfra,Fgf9,Nog,Shox2,Marcks,Smad3,Hmgcr,Fgf8,Erbb3,Btg2,Arntl,Grem1,Gata4,Pitx2,Prkg1,Mtor,Erbb4,Sik1,Pdlim5,Wnt5a,Vax1,Myh10,Itga7,Smad7,Actn1,Mapk14,Ndufv2,Tgfb2,Tgfbr2,Tsc22d3,Fdps,Ybx3,Rps6kb1,Dll1,Hdac2,Cxadr,Pitx1,Nr2f2,Nkx2-5,Skil,Wnt2,Six1,Hnrnpu,Lef1,Ep300,Foxc2,Cby1,Cops2,Mbnl1,Ddx5,Cacybp,Ctdp1,Foxp1,Arid1a,Pin1,Six4,Wnt3a,Tomm70,Tbx5,Ri…
13_Member	GO Biological Processes	GO:0007517	muscle organ development	-12.8102	-10.359	101/402	24225,24337,24577,24674,24851,24883,24925,25022,25444,25495,25546,25585,25631,25675,29349,29496,29619,29657,50566,54254,54284,56718,59323,60584,64566,64571,81008,81516,81634,81649,81809,81810,83514,83791,83807,83840,84010,84577,89843,113983,113984,114109,114208,114487,114502,114634,140433,161452,170915,171356,261736,282635,287765,289229,291414,296272,296511,297480,297748,298696,299138,303181,3040…	Bdnf,Erbb2,Myc,Ppp3ca,Tpm1,Wt1,Adrb1,Fgfr2,Fgf9,Nog,Shox2,Id3,Smad3,Hmgcr,Fgf8,Erbb3,Btg2,Arntl,Grem1,Gata4,Pitx2,Mtor,Erbb4,Lif,Wnt5a,Vax1,Itga7,Smad7,Actn1,Mapk14,Tgfb2,Tgfbr2,Tsc22d3,Fdps,Ybx3,Rps6kb1,Dll1,Hdac2,Cxadr,Pitx1,Nr2f2,Nkx2-5,Skil,Wnt2,Pax3,Six1,Lama5,Lef1,Ep300,Foxc2,Cops2,Mbnl1,Ddx5,Vangl2,Ctdp1,Tcf15,Alx4,Foxp1,Jph1,Pin1,Six4,Wnt3a,Tomm70,Tbx5,Ripor2,Neurl1,Dll4,Cyp26b1,Msc,Sox17…
13_Member	GO Biological Processes	GO:0042692	muscle cell differentiation	-8.32172	-6.26303	86/384	24225,24628,24674,24705,24771,24851,24883,24925,25022,25084,25216,25267,25546,29154,29497,29577,50566,54254,54284,54286,56718,58814,59329,64031,64353,79433,81634,81649,83501,83576,83791,84010,84577,89843,114109,114634,117095,117280,170915,246768,289144,291414,293692,294408,297480,297867,297893,298696,299138,300807,300992,301309,301346,303181,304017,304514,306934,307305,308766,312299,312495,313757…	Bdnf,Pdgfb,Ppp3ca,Rara,Sdc4,Tpm1,Wt1,Adrb1,Fgfr2,Il4r,Sdc1,Pdgfra,Shox2,Capn2,Ptbp1,Hes1,Grem1,Gata4,Pitx2,Prkg1,Mtor,Tmod2,Sik1,Pdcd4,Pdlim5,Myh10,Actn1,Mapk14,Cdh2,Sort1,Fdps,Dll1,Hdac2,Cxadr,Nkx2-5,Six1,Bhlhe41,Hnrnpu,Ep300,Cby1,Cacybp,Ctdp1,Ehd1,Asf1a,Foxp1,Arid1a,Hdac1,Pin1,Six4,Rora,Cacna2d2,Adgrb3,Sema4c,Wnt3a,Tomm70,Tbx5,Ripor2,Prdm6,Mesp1,Ezh2,Cyp26b1,Ski,Olfm2,Tmtc3,Mrtfa,Wnt7b,Tbx18,Tb…
13_Member	GO Biological Processes	GO:0048738	cardiac muscle tissue development	-8.17768	-6.13782	62/246	24705,24851,24883,24925,25022,25267,25444,25495,25603,29349,29496,50566,54254,54284,54286,56718,59323,59329,64353,64566,79433,81516,81649,81728,81809,81810,83791,84010,84577,89843,114109,114487,117280,171356,246768,289144,291414,297480,297867,298696,303181,304017,304514,308766,311332,312974,315870,315891,353305,361801,362934,363256,363259,364418,364706,365601,679028,681740,686117,689314,691504,10…	Rara,Tpm1,Wt1,Adrb1,Fgfr2,Pdgfra,Fgf9,Nog,Marcks,Fgf8,Erbb3,Grem1,Gata4,Pitx2,Prkg1,Mtor,Erbb4,Sik1,Pdlim5,Wnt5a,Myh10,Smad7,Mapk14,Ndufv2,Tgfb2,Tgfbr2,Fdps,Dll1,Hdac2,Cxadr,Nkx2-5,Wnt2,Hnrnpu,Foxc2,Cby1,Cacybp,Ctdp1,Foxp1,Arid1a,Pin1,Wnt3a,Tomm70,Tbx5,Mesp1,Dll4,Chd7,Tbx18,RGD1309079,Tbx3,Rxrb,Ly6e,Speg,Obsl1,Nkx2-6,Foxc1,Atg5,Rbpj,Jarid2,Meis1,Mapk11,Zfpm1,Fzd7
13_Member	GO Biological Processes	GO:0060538	skeletal muscle organ development	-7.2311	-5.28973	54/214	24337,24577,24674,24883,25546,25675,29496,29619,29657,54284,64571,81008,81634,81649,81809,83514,83807,83840,84010,113983,113984,114208,114502,114634,170915,261736,282635,287765,297480,299138,303181,306934,309459,312495,312897,312936,313471,313757,314322,316052,360737,360903,361256,362895,363287,365460,367152,500453,500574,679869,680066,680122,682076,688999	Erbb2,Myc,Ppp3ca,Wt1,Shox2,Hmgcr,Erbb3,Btg2,Arntl,Pitx2,Vax1,Itga7,Actn1,Mapk14,Tgfb2,Tsc22d3,Ybx3,Rps6kb1,Dll1,Pitx1,Nr2f2,Skil,Pax3,Six1,Ep300,Cops2,Mbnl1,Ddx5,Foxp1,Six4,Wnt3a,Ripor2,Neurl1,Cyp26b1,Msc,Sox17,Dmrta2,Ski,Fos,Eomes,Tbx1,Fgfrl1,Svil,Stac3,Hdac4,Tll2,Foxl2,Pax5,Pax7,Tcf7l2,Lemd3,Sap30,Mnx1,Hoxd9
13_Member	GO Biological Processes	GO:0007519	skeletal muscle tissue development	-6.47071	-4.64312	50/202	24337,24577,24674,25546,25675,29496,29619,29657,54284,64571,81008,81634,81649,81809,83514,83807,83840,84010,113983,113984,114208,114634,170915,261736,282635,287765,297480,299138,303181,306934,309459,312495,312897,312936,313471,313757,314322,316052,360737,361256,362895,363287,365460,367152,500453,500574,679869,680066,680122,688999	Erbb2,Myc,Ppp3ca,Shox2,Hmgcr,Erbb3,Btg2,Arntl,Pitx2,Vax1,Itga7,Actn1,Mapk14,Tgfb2,Tsc22d3,Ybx3,Rps6kb1,Dll1,Pitx1,Nr2f2,Skil,Six1,Ep300,Cops2,Mbnl1,Ddx5,Foxp1,Six4,Wnt3a,Ripor2,Neurl1,Cyp26b1,Msc,Sox17,Dmrta2,Ski,Fos,Eomes,Tbx1,Svil,Stac3,Hdac4,Tll2,Foxl2,Pax5,Pax7,Tcf7l2,Lemd3,Sap30,Hoxd9
13_Member	GO Biological Processes	GO:0051146	striated muscle cell differentiation	-5.98706	-4.20393	67/311	24225,24674,24705,24851,24883,24925,25084,25216,25267,25546,29154,50566,54254,54284,54286,56718,58814,59329,64353,79433,81634,81649,83501,83576,83791,84010,84577,89843,114109,114634,117095,117280,170915,246768,289144,291414,293692,297480,297867,297893,298696,299138,300992,301309,303181,304017,304514,306934,308766,312299,312495,313757,314785,353305,360737,360950,361801,362895,363256,363259,363287,…	Bdnf,Ppp3ca,Rara,Tpm1,Wt1,Adrb1,Il4r,Sdc1,Pdgfra,Shox2,Capn2,Grem1,Gata4,Pitx2,Prkg1,Mtor,Tmod2,Sik1,Pdlim5,Myh10,Actn1,Mapk14,Cdh2,Sort1,Fdps,Dll1,Hdac2,Cxadr,Nkx2-5,Six1,Bhlhe41,Hnrnpu,Ep300,Cby1,Cacybp,Ctdp1,Ehd1,Foxp1,Arid1a,Hdac1,Pin1,Six4,Cacna2d2,Adgrb3,Wnt3a,Tomm70,Tbx5,Ripor2,Mesp1,Ezh2,Cyp26b1,Ski,Tmtc3,Tbx3,Tbx1,Wdr1,Rxrb,Stac3,Speg,Obsl1,Hdac4,Nkx2-6,Atg5,Ybx1,Rbpj,Myef2,Fzd7
13_Member	GO Biological Processes	GO:0035051	cardiocyte differentiation	-5.50208	-3.77237	43/176	24329,24705,24883,24925,25267,29146,29577,50566,54254,54284,54286,56718,59329,64031,64353,79433,81809,83791,84010,84577,89843,114109,117280,246768,289144,291414,297480,297867,298696,303181,304017,304514,308766,312936,316052,353305,361801,363256,363259,364418,365601,679028,100360552	Egfr,Rara,Wt1,Adrb1,Pdgfra,Jag1,Hes1,Grem1,Gata4,Pitx2,Prkg1,Mtor,Sik1,Pdcd4,Pdlim5,Myh10,Tgfb2,Fdps,Dll1,Hdac2,Cxadr,Nkx2-5,Hnrnpu,Cby1,Cacybp,Ctdp1,Foxp1,Arid1a,Pin1,Wnt3a,Tomm70,Tbx5,Mesp1,Sox17,Eomes,Tbx3,Rxrb,Speg,Obsl1,Nkx2-6,Atg5,Rbpj,Fzd7
13_Member	GO Biological Processes	GO:0055007	cardiac muscle cell differentiation	-4.95087	-3.29991	36/144	24705,24883,24925,25267,50566,54254,54284,54286,56718,59329,64353,79433,83791,84010,84577,89843,114109,117280,246768,289144,291414,297480,297867,298696,303181,304017,304514,308766,353305,361801,363256,363259,364418,365601,679028,100360552	Rara,Wt1,Adrb1,Pdgfra,Grem1,Gata4,Pitx2,Prkg1,Mtor,Sik1,Pdlim5,Myh10,Fdps,Dll1,Hdac2,Cxadr,Nkx2-5,Hnrnpu,Cby1,Cacybp,Ctdp1,Foxp1,Arid1a,Pin1,Wnt3a,Tomm70,Tbx5,Mesp1,Tbx3,Rxrb,Speg,Obsl1,Nkx2-6,Atg5,Rbpj,Fzd7
13_Member	GO Biological Processes	GO:0055001	muscle cell development	-3.42285	-2.04746	40/194	24674,24851,24925,25216,25267,25546,29577,54254,54284,54286,56718,58814,64353,79433,81634,83791,84577,89843,114109,114634,117280,170915,291414,297480,298696,299138,300992,304017,306934,313757,314785,353305,360950,362708,362895,363256,363259,363287,364418,365601	Ppp3ca,Tpm1,Adrb1,Sdc1,Pdgfra,Shox2,Hes1,Gata4,Pitx2,Prkg1,Mtor,Tmod2,Pdlim5,Myh10,Actn1,Fdps,Hdac2,Cxadr,Nkx2-5,Six1,Hnrnpu,Ep300,Ctdp1,Foxp1,Pin1,Six4,Cacna2d2,Tomm70,Ripor2,Ski,Tmtc3,Tbx3,Wdr1,Trim54,Stac3,Speg,Obsl1,Hdac4,Nkx2-6,Atg5
13_Member	GO Biological Processes	GO:0055002	striated muscle cell development	-3.3456	-1.98808	38/183	24674,24851,24925,25216,25267,25546,54254,54284,54286,56718,58814,64353,79433,81634,83791,84577,89843,114109,114634,117280,170915,291414,297480,298696,299138,300992,304017,306934,313757,314785,353305,360950,362895,363256,363259,363287,364418,365601	Ppp3ca,Tpm1,Adrb1,Sdc1,Pdgfra,Shox2,Gata4,Pitx2,Prkg1,Mtor,Tmod2,Pdlim5,Myh10,Actn1,Fdps,Hdac2,Cxadr,Nkx2-5,Six1,Hnrnpu,Ep300,Ctdp1,Foxp1,Pin1,Six4,Cacna2d2,Tomm70,Ripor2,Ski,Tmtc3,Tbx3,Wdr1,Stac3,Speg,Obsl1,Hdac4,Nkx2-6,Atg5
13_Member	GO Biological Processes	GO:0055006	cardiac cell development	-3.03643	-1.74128	24/103	24925,25267,29146,54254,54284,54286,56718,64031,64353,79433,83791,84577,89843,114109,117280,291414,297480,298696,304017,353305,363256,363259,364418,365601	Adrb1,Pdgfra,Jag1,Gata4,Pitx2,Prkg1,Mtor,Pdcd4,Pdlim5,Myh10,Fdps,Hdac2,Cxadr,Nkx2-5,Hnrnpu,Ctdp1,Foxp1,Pin1,Tomm70,Tbx3,Speg,Obsl1,Nkx2-6,Atg5
13_Member	GO Biological Processes	GO:0055013	cardiac muscle cell development	-2.61299	-1.41217	22/98	24925,25267,54254,54284,54286,56718,64353,79433,83791,84577,89843,114109,117280,291414,297480,298696,304017,353305,363256,363259,364418,365601	Adrb1,Pdgfra,Gata4,Pitx2,Prkg1,Mtor,Pdlim5,Myh10,Fdps,Hdac2,Cxadr,Nkx2-5,Hnrnpu,Ctdp1,Foxp1,Pin1,Tomm70,Tbx3,Speg,Obsl1,Nkx2-6,Atg5
14_Summary	KEGG Pathway	rno05200	Pathways in cancer	-15.6968	-12.9474	107/398	24252,24329,24337,24368,24400,24516,24577,24628,24654,24680,24705,24827,24874,24929,25022,25031,25164,25266,25267,25444,25513,25631,25636,25661,25664,25686,29349,29382,29560,29741,54355,56718,58919,58979,60661,60662,64508,64532,64566,66025,81504,81666,81736,81809,81810,84023,84482,84489,84577,84598,89830,114120,114483,114486,114487,114517,114851,116466,116499,116546,116744,117557,140433,140584,14…	Cebpa,Egfr,Erbb2,Fh,Gnb1,Jun,Myc,Pdgfb,Plcb1,Prkca,Rara,Tgfa,Vhl,Ptger3,Fgfr2,Plcb4,Cdkn2b,Pdgfa,Pdgfra,Fgf9,Pik3r1,Smad3,Prkaca,Fn1,Pparg,Gnai1,Fgf8,Ctbp1,Hif1a,Pik3r2,Rassf5,Mtor,Ccnd1,Gng7,Max,Fgf5,Adcy3,Adcy5,Wnt5a,Lpar3,Grb2,Gnaq,Nfkb1,Tgfb2,Tgfbr2,Ptger4,Foxo1,Fgfr3,Hdac2,Jak1,Ptch1,Gng12,Cdk6,Braf,Wnt2,Itga6,Cdkn1a,Wnt2b,Fgf4,Ralb,Lpar1,Tpm3,Lama5,Wnt11,Gli3,Lef1,Ep300,Fzd9,Fzd3,Fzd6,Col4a…
14_Member	KEGG Pathway	rno05200	Pathways in cancer	-15.6968	-12.9474	107/398	24252,24329,24337,24368,24400,24516,24577,24628,24654,24680,24705,24827,24874,24929,25022,25031,25164,25266,25267,25444,25513,25631,25636,25661,25664,25686,29349,29382,29560,29741,54355,56718,58919,58979,60661,60662,64508,64532,64566,66025,81504,81666,81736,81809,81810,84023,84482,84489,84577,84598,89830,114120,114483,114486,114487,114517,114851,116466,116499,116546,116744,117557,140433,140584,14…	Cebpa,Egfr,Erbb2,Fh,Gnb1,Jun,Myc,Pdgfb,Plcb1,Prkca,Rara,Tgfa,Vhl,Ptger3,Fgfr2,Plcb4,Cdkn2b,Pdgfa,Pdgfra,Fgf9,Pik3r1,Smad3,Prkaca,Fn1,Pparg,Gnai1,Fgf8,Ctbp1,Hif1a,Pik3r2,Rassf5,Mtor,Ccnd1,Gng7,Max,Fgf5,Adcy3,Adcy5,Wnt5a,Lpar3,Grb2,Gnaq,Nfkb1,Tgfb2,Tgfbr2,Ptger4,Foxo1,Fgfr3,Hdac2,Jak1,Ptch1,Gng12,Cdk6,Braf,Wnt2,Itga6,Cdkn1a,Wnt2b,Fgf4,Ralb,Lpar1,Tpm3,Lama5,Wnt11,Gli3,Lef1,Ep300,Fzd9,Fzd3,Fzd6,Col4a…
14_Member	KEGG Pathway	rno05224	Breast cancer	-9.5395	-7.35404	46/146	24329,24337,24516,24577,25444,25513,29146,29349,29577,29741,56718,58919,60662,64566,81504,83840,84010,84584,114483,114486,114487,114851,116466,116499,140584,161452,266608,266715,282581,291105,293621,299611,303181,303586,303811,311332,312451,313845,314322,314612,315196,363595,363913,679110,679869,100360552	Egfr,Erbb2,Jun,Myc,Fgf9,Pik3r1,Jag1,Fgf8,Hes1,Pik3r2,Mtor,Ccnd1,Fgf5,Wnt5a,Grb2,Rps6kb1,Dll1,Ncoa3,Cdk6,Braf,Wnt2,Cdkn1a,Wnt2b,Fgf4,Wnt11,Lef1,Fzd9,Fzd3,Fzd6,E2f3,Hras,Apc2,Wnt3a,Wnt9b,Dvl3,Dll4,Tcf7l1,Sos1,Fos,Shc2,Wnt7b,Tcf7,Fzd10,Frat2,Tcf7l2,Fzd7
14_Member	KEGG Pathway	rno05205	Proteoglycans in cancer	-9.09609	-6.9626	57/207	24245,24329,24337,24577,24680,24771,25216,25513,25636,25661,25697,29496,29513,29560,29741,56718,58919,59323,64031,64566,81504,81649,81809,81822,83840,84399,89830,114486,114487,114633,114851,116466,116670,140584,266608,266715,282581,287765,293621,296456,296603,303181,303586,306570,310553,313845,314856,315196,315655,360482,360820,361388,361833,363913,367072,689314,100360552	Camk2b,Egfr,Erbb2,Myc,Prkca,Sdc4,Sdc1,Pik3r1,Prkaca,Fn1,Ctsl,Erbb3,Mapk13,Hif1a,Pik3r2,Mtor,Ccnd1,Erbb4,Pdcd4,Wnt5a,Grb2,Mapk14,Tgfb2,Actb,Rps6kb1,Ihh,Ptch1,Braf,Wnt2,Plce1,Cdkn1a,Wnt2b,Ppp1r12a,Wnt11,Fzd9,Fzd3,Fzd6,Ddx5,Hras,Itgav,Vav2,Wnt3a,Wnt9b,Ank1,Tlr2,Sos1,Mdm2,Wnt7b,Rdx,Tfap4,Pxn,Gab1,Ank3,Fzd10,Arhgef12,Mapk11,Fzd7
14_Member	KEGG Pathway	rno04310	Wnt signaling pathway	-8.58259	-6.4896	44/145	24245,24516,24577,24654,24674,24680,25031,25631,25636,29382,29748,58822,58919,64566,114487,116466,140584,140941,161452,170915,266608,266715,282581,289144,289229,299611,303181,303586,303811,307641,308068,309377,310552,312451,312936,315196,362356,363595,363913,364952,679110,679869,100360552,100361818	Camk2b,Jun,Myc,Plcb1,Ppp3ca,Prkca,Plcb4,Smad3,Prkaca,Ctbp1,Ppp3r1,Csnk1e,Ccnd1,Wnt5a,Wnt2,Wnt2b,Wnt11,Siah1,Lef1,Ep300,Fzd9,Fzd3,Fzd6,Cacybp,Vangl2,Apc2,Wnt3a,Wnt9b,Dvl3,Csnk2a2,Nkd2,Sfrp5,Sfrp2,Tcf7l1,Sox17,Wnt7b,Cul1,Tcf7,Fzd10,Nkd1,Frat2,Tcf7l2,Fzd7,Nfatc1
14_Member	KEGG Pathway	rno04390	Hippo signaling pathway	-8.49588	-6.42038	46/156	24577,24672,25576,25578,25631,25744,29753,56011,58822,58919,64462,64566,81516,81809,81810,81822,114487,116466,140584,161452,252833,252834,257646,266608,266715,282581,294299,297357,299611,303039,303181,303586,303811,305025,305922,308265,312451,314259,315196,362279,362938,363595,363913,364952,679869,100360552	Myc,Ppp2ca,Ywhah,Ywhaz,Smad3,Nf2,Ywhae,Ywhab,Csnk1e,Ccnd1,Csnk1d,Wnt5a,Smad7,Tgfb2,Tgfbr2,Actb,Wnt2,Wnt2b,Wnt11,Lef1,Gdf7,Gdf6,Frmd6,Fzd9,Fzd3,Fzd6,Tead3,Ctnna2,Apc2,Wwc1,Wnt3a,Wnt9b,Dvl3,Tp53bp2,Lats2,Lats1,Tcf7l1,Mpp5,Wnt7b,Pard6b,Scrib,Tcf7,Fzd10,Nkd1,Tcf7l2,Fzd7
14_Member	KEGG Pathway	rno04550	Signaling pathways regulating pluripotency of stem cells	-7.55505	-5.58101	41/140	24577,24817,25022,25196,25509,25513,25585,25631,29513,29741,59328,60584,64566,81504,81649,84489,84598,114208,114487,116466,124451,140584,266608,266715,282581,287662,291023,293621,299611,303181,303586,303811,305624,315196,353305,363913,681178,681740,686117,689314,100360552	Myc,Hnf1a,Fgfr2,Inhbb,Pax6,Pik3r1,Id3,Smad3,Mapk13,Pik3r2,Smad5,Lif,Wnt5a,Grb2,Mapk14,Fgfr3,Jak1,Skil,Wnt2,Wnt2b,Lhx5,Wnt11,Fzd9,Fzd3,Fzd6,Pcgf2,Id4,Hras,Apc2,Wnt3a,Wnt9b,Dvl3,Pcgf3,Wnt7b,Tbx3,Fzd10,Pcgf5,Jarid2,Meis1,Mapk11,Fzd7
14_Member	KEGG Pathway	rno05217	Basal cell carcinoma	-6.24635	-4.44079	21/55	64566,89830,114487,116466,140584,140588,161452,266608,266715,282581,291936,299611,303181,303586,303811,312451,315196,363595,363913,679869,100360552	Wnt5a,Ptch1,Wnt2,Wnt2b,Wnt11,Gli3,Lef1,Fzd9,Fzd3,Fzd6,Hhip,Apc2,Wnt3a,Wnt9b,Dvl3,Tcf7l1,Wnt7b,Tcf7,Fzd10,Tcf7l2,Fzd7
14_Member	KEGG Pathway	rno01522	Endocrine resistance	-6.16312	-4.36214	29/93	24329,24337,24516,25513,25636,29146,29513,29741,56718,58919,64508,64532,81504,81649,83840,84010,84584,114486,114851,291105,293621,302950,311332,313845,314322,314612,314856,363026,689314	Egfr,Erbb2,Jun,Pik3r1,Prkaca,Jag1,Mapk13,Pik3r2,Mtor,Ccnd1,Adcy3,Adcy5,Grb2,Mapk14,Rps6kb1,Dll1,Ncoa3,Braf,Cdkn1a,E2f3,Hras,Adcy9,Dll4,Sos1,Fos,Shc2,Mdm2,Carm1,Mapk11
14_Member	KEGG Pathway	rno04916	Melanogenesis	-5.95324	-4.17734	30/100	24244,24245,24654,24680,25031,25636,25686,64508,64532,64566,81666,114487,116466,140584,161452,170915,266608,266715,282581,293621,302950,303181,303586,303811,312451,315196,363595,363913,679869,100360552	Calm3,Camk2b,Plcb1,Prkca,Plcb4,Prkaca,Gnai1,Adcy3,Adcy5,Wnt5a,Gnaq,Wnt2,Wnt2b,Wnt11,Lef1,Ep300,Fzd9,Fzd3,Fzd6,Hras,Adcy9,Wnt3a,Wnt9b,Dvl3,Tcf7l1,Wnt7b,Tcf7,Fzd10,Tcf7l2,Fzd7
14_Member	KEGG Pathway	rno04150	mTOR signaling pathway	-5.23641	-3.53777	39/157	24680,24954,25467,25513,29741,50719,56718,64226,64566,81504,83840,114486,114487,116466,116636,117045,140584,140942,266608,266715,282581,293561,293621,301574,303181,303206,303586,303811,313845,314621,314979,315189,315196,362324,362802,363913,501146,502988,100360552	Prkca,Insr,Irs1,Pik3r1,Pik3r2,Slc7a5,Mtor,Mlst8,Wnt5a,Grb2,Rps6kb1,Braf,Wnt2,Wnt2b,Eif4ebp1,Eif4e,Wnt11,Ddit4,Fzd9,Fzd3,Fzd6,Rnf152,Hras,Cab39,Wnt3a,Ulk2,Wnt9b,Dvl3,Sos1,Stk11,Deptor,Prr5,Wnt7b,Mios,Atp6v1c2,Fzd10,Stradb,Sesn2,Fzd7
14_Member	KEGG Pathway	rno05166	HTLV-I infection	-3.07533	-1.77416	54/294	24516,24577,24628,24674,25164,25266,25267,25464,25513,25620,25631,25636,25663,29741,29748,58919,64508,64532,64566,79255,79426,81736,81809,81810,83791,84509,84598,114487,114851,116466,140584,170915,266608,266715,282581,291105,293621,297176,299611,302950,303181,303586,303811,304573,304786,314322,315196,363913,365297,501281,689030,100360552,100360982,100361818	Jun,Myc,Pdgfb,Ppp3ca,Cdkn2b,Pdgfa,Pdgfra,Icam1,Pik3r1,Crem,Smad3,Prkaca,Il1r1,Pik3r2,Ppp3r1,Ccnd1,Adcy3,Adcy5,Wnt5a,Atf4,Zfp36,Nfkb1,Tgfb2,Tgfbr2,Fdps,Ran,Jak1,Wnt2,Cdkn1a,Wnt2b,Wnt11,Ep300,Fzd9,Fzd3,Fzd6,E2f3,Hras,Mad2l1,Apc2,Adcy9,Wnt3a,Wnt9b,Dvl3,Pole,Elk4,Fos,Wnt7b,Fzd10,Crtc3,Ranbp3,Tbpl1,Fzd7,Relb,Nfatc1
15_Summary	GO Biological Processes	GO:0030855	epithelial cell differentiation	-14.892	-12.2257	148/644	24170,24388,24516,24628,24695,24705,24831,24874,24883,25022,25099,25100,25164,25216,25464,25484,25509,25529,25585,25628,25631,25640,25664,25697,25744,26955,29146,29227,29349,29415,29535,29560,29577,29609,29657,29748,50566,50677,54254,54267,58919,59114,59323,60329,60584,64160,64566,65193,66019,79426,81749,83501,83718,83720,84010,84399,84481,84489,84577,84584,85425,85471,89830,113984,114208,114483,…	Add1,Gfi1,Jun,Pdgfb,Pthlh,Rara,Thrb,Vhl,Wt1,Fgfr2,Foxa2,Foxa3,Cdkn2b,Sdc1,Icam1,Myo1e,Pax6,Ptprs,Id3,Nkx2-1,Smad3,Hnf1b,Pparg,Ctsl,Nf2,Afdn,Jag1,Nfib,Fgf8,S1pr2,Pdx1,Hif1a,Hes1,Pitx3,Arntl,Ppp3r1,Grem1,Ptpro,Gata4,Maf,Ccnd1,Slc9a3r1,Erbb4,Neurog3,Lif,Basp1,Wnt5a,Nkx6-1,Cdx2,Zfp36,Prkch,Cdh2,Clic4,Fat1,Dll1,Ihh,Arid4b,Fgfr3,Hdac2,Ncoa3,Tdrd7,Gata3,Ptch1,Nr2f2,Skil,Cdk6,Dmrt1,Six1,Cyp27b1,Cdkn1a,Cu…
15_Member	GO Biological Processes	GO:0030855	epithelial cell differentiation	-14.892	-12.2257	148/644	24170,24388,24516,24628,24695,24705,24831,24874,24883,25022,25099,25100,25164,25216,25464,25484,25509,25529,25585,25628,25631,25640,25664,25697,25744,26955,29146,29227,29349,29415,29535,29560,29577,29609,29657,29748,50566,50677,54254,54267,58919,59114,59323,60329,60584,64160,64566,65193,66019,79426,81749,83501,83718,83720,84010,84399,84481,84489,84577,84584,85425,85471,89830,113984,114208,114483,…	Add1,Gfi1,Jun,Pdgfb,Pthlh,Rara,Thrb,Vhl,Wt1,Fgfr2,Foxa2,Foxa3,Cdkn2b,Sdc1,Icam1,Myo1e,Pax6,Ptprs,Id3,Nkx2-1,Smad3,Hnf1b,Pparg,Ctsl,Nf2,Afdn,Jag1,Nfib,Fgf8,S1pr2,Pdx1,Hif1a,Hes1,Pitx3,Arntl,Ppp3r1,Grem1,Ptpro,Gata4,Maf,Ccnd1,Slc9a3r1,Erbb4,Neurog3,Lif,Basp1,Wnt5a,Nkx6-1,Cdx2,Zfp36,Prkch,Cdh2,Clic4,Fat1,Dll1,Ihh,Arid4b,Fgfr3,Hdac2,Ncoa3,Tdrd7,Gata3,Ptch1,Nr2f2,Skil,Cdk6,Dmrt1,Six1,Cyp27b1,Cdkn1a,Cu…
15_Member	GO Biological Processes	GO:0002064	epithelial cell development	-4.01803	-2.52186	51/251	24170,24628,24705,24883,25022,25216,25464,25484,25509,25529,26955,29146,29415,29560,29657,59114,64566,65193,83718,83720,84010,84399,84481,84489,114483,114498,114851,116670,116677,117955,171120,171356,245960,257646,287615,295347,306792,306862,306934,307376,310460,310533,313255,315196,315655,362280,362938,365657,366214,679158,100912563	Add1,Pdgfb,Rara,Wt1,Fgfr2,Sdc1,Icam1,Myo1e,Pax6,Ptprs,Afdn,Jag1,S1pr2,Hif1a,Arntl,Slc9a3r1,Wnt5a,Nkx6-1,Clic4,Fat1,Dll1,Ihh,Arid4b,Fgfr3,Cdk6,Dmrt1,Cdkn1a,Ppp1r12a,F2rl1,Slc4a7,Jmjd1c,Foxc2,Alg10,Frmd6,Vezf1,Rap1a,S1pr3,Tfap2a,Ripor2,Onecut2,Arhgef26,Rapgef2,Whrn,Wnt7b,Rdx,Tfap2c,Scrib,Marveld2,Nkx2-2,Sox3,Insm1
15_Member	GO Biological Processes	GO:0003158	endothelium development	-3.2679	-1.92649	29/129	24170,24628,24874,25464,25529,26955,29146,29415,64373,83718,84010,113984,116670,116677,171356,287615,295347,297480,306792,308766,310460,310533,311332,312936,315196,315655,365657,500200,679028	Add1,Pdgfb,Vhl,Icam1,Ptprs,Afdn,Jag1,S1pr2,Rhob,Clic4,Dll1,Nr2f2,Ppp1r12a,F2rl1,Foxc2,Vezf1,Rap1a,Foxp1,S1pr3,Mesp1,Arhgef26,Rapgef2,Dll4,Sox17,Wnt7b,Rdx,Marveld2,Atoh8,Rbpj
15_Member	GO Biological Processes	GO:0061028	establishment of endothelial barrier	-2.6545	-1.44209	13/46	24170,25464,25529,26955,29415,116670,116677,295347,306792,310533,315196,315655,365657	Add1,Icam1,Ptprs,Afdn,S1pr2,Ppp1r12a,F2rl1,Rap1a,S1pr3,Rapgef2,Wnt7b,Rdx,Marveld2
15_Member	GO Biological Processes	GO:0045446	endothelial cell differentiation	-2.46139	-1.29254	24/113	24170,24874,25464,25529,26955,29146,29415,83718,84010,113984,116670,116677,287615,295347,306792,308766,310460,310533,312936,315196,315655,365657,500200,679028	Add1,Vhl,Icam1,Ptprs,Afdn,Jag1,S1pr2,Clic4,Dll1,Nr2f2,Ppp1r12a,F2rl1,Vezf1,Rap1a,S1pr3,Mesp1,Arhgef26,Rapgef2,Sox17,Wnt7b,Rdx,Marveld2,Atoh8,Rbpj
15_Member	GO Biological Processes	GO:0001885	endothelial cell development	-2.1258	-1.05372	16/70	24170,25464,25529,26955,29415,83718,116670,116677,287615,295347,306792,310460,310533,315196,315655,365657	Add1,Icam1,Ptprs,Afdn,S1pr2,Clic4,Ppp1r12a,F2rl1,Vezf1,Rap1a,S1pr3,Arhgef26,Rapgef2,Wnt7b,Rdx,Marveld2
16_Summary	GO Biological Processes	GO:0048732	gland development	-14.4146	-11.7907	145/634	24165,24166,24240,24252,24318,24329,24337,24516,24577,24628,24695,24705,24817,24827,24831,24883,24898,24954,25022,25059,25100,25164,25196,25266,25267,25467,25478,25495,25509,25628,25631,25640,29227,29232,29285,29338,29349,29496,29535,29560,29577,29667,54251,54264,54284,58919,59114,59323,64469,64547,64566,65218,78965,79121,79238,81765,81809,81810,81817,83629,83826,84017,84399,84584,85471,85496,898…	Ada,Adcyap1,Cad,Cebpa,Drd2,Egfr,Erbb2,Jun,Myc,Pdgfb,Pthlh,Rara,Hnf1a,Tgfa,Thrb,Wt1,Slc6a3,Insr,Fgfr2,Hk2,Foxa3,Cdkn2b,Inhbb,Pdgfa,Pdgfra,Irs1,Man2a1,Nog,Pax6,Nkx2-1,Smad3,Hnf1b,Nfib,Clcn2,Rps15,Prdx2,Fgf8,Erbb3,Pdx1,Hif1a,Hes1,Srsf5,Flt1,Mafb,Pitx2,Ccnd1,Slc9a3r1,Erbb4,Slc30a4,Bcl2l11,Wnt5a,Agap2,Csf1,Arf6,Hmgcl,Rpl13,Tgfb2,Tgfbr2,Usf2,Slc12a2,Nr5a1,Hmga2,Ihh,Ncoa3,Gata3,Enpp1,Ptch1,Pitx1,Nkx2-5,…
16_Member	GO Biological Processes	GO:0048732	gland development	-14.4146	-11.7907	145/634	24165,24166,24240,24252,24318,24329,24337,24516,24577,24628,24695,24705,24817,24827,24831,24883,24898,24954,25022,25059,25100,25164,25196,25266,25267,25467,25478,25495,25509,25628,25631,25640,29227,29232,29285,29338,29349,29496,29535,29560,29577,29667,54251,54264,54284,58919,59114,59323,64469,64547,64566,65218,78965,79121,79238,81765,81809,81810,81817,83629,83826,84017,84399,84584,85471,85496,898…	Ada,Adcyap1,Cad,Cebpa,Drd2,Egfr,Erbb2,Jun,Myc,Pdgfb,Pthlh,Rara,Hnf1a,Tgfa,Thrb,Wt1,Slc6a3,Insr,Fgfr2,Hk2,Foxa3,Cdkn2b,Inhbb,Pdgfa,Pdgfra,Irs1,Man2a1,Nog,Pax6,Nkx2-1,Smad3,Hnf1b,Nfib,Clcn2,Rps15,Prdx2,Fgf8,Erbb3,Pdx1,Hif1a,Hes1,Srsf5,Flt1,Mafb,Pitx2,Ccnd1,Slc9a3r1,Erbb4,Slc30a4,Bcl2l11,Wnt5a,Agap2,Csf1,Arf6,Hmgcl,Rpl13,Tgfb2,Tgfbr2,Usf2,Slc12a2,Nr5a1,Hmga2,Ihh,Ncoa3,Gata3,Enpp1,Ptch1,Pitx1,Nkx2-5,…
16_Member	GO Biological Processes	GO:0061008	hepaticobiliary system development	-5.09083	-3.41098	53/242	24165,24240,24252,24329,24337,24516,24577,24705,24817,24827,25100,25164,25478,25631,25640,29285,29535,29577,29667,54251,58919,79121,79238,81765,84399,85496,89830,117282,140588,170818,170915,287867,295347,303181,304666,307376,307641,308607,308766,311642,312299,312927,312936,314818,360992,361271,363058,497778,498328,499443,681740,687266,689890	Ada,Cad,Cebpa,Egfr,Erbb2,Jun,Myc,Rara,Hnf1a,Tgfa,Foxa3,Cdkn2b,Man2a1,Smad3,Hnf1b,Rps15,Pdx1,Hes1,Srsf5,Flt1,Ccnd1,Arf6,Hmgcl,Rpl13,Ihh,Enpp1,Ptch1,Hnrnpk,Gli3,Icmt,Ep300,Ccdc40,Rap1a,Wnt3a,Klf1,Onecut2,Csnk2a2,E2f8,Mesp1,Sulf2,Ezh2,Rb1cc1,Sox17,E2f7,Pnpt1,Upf2,Cadm1,Dut,Pkd2,Lims1,Jarid2,Fpgs,Srsf1
16_Member	GO Biological Processes	GO:0001889	liver development	-4.92292	-3.27836	52/239	24165,24240,24252,24329,24337,24516,24577,24705,24817,24827,25100,25164,25478,25631,25640,29285,29535,29577,29667,54251,58919,79121,79238,81765,84399,85496,89830,117282,140588,170818,170915,287867,295347,303181,304666,307376,307641,308607,308766,311642,312299,312927,314818,360992,361271,363058,497778,498328,499443,681740,687266,689890	Ada,Cad,Cebpa,Egfr,Erbb2,Jun,Myc,Rara,Hnf1a,Tgfa,Foxa3,Cdkn2b,Man2a1,Smad3,Hnf1b,Rps15,Pdx1,Hes1,Srsf5,Flt1,Ccnd1,Arf6,Hmgcl,Rpl13,Ihh,Enpp1,Ptch1,Hnrnpk,Gli3,Icmt,Ep300,Ccdc40,Rap1a,Wnt3a,Klf1,Onecut2,Csnk2a2,E2f8,Mesp1,Sulf2,Ezh2,Rb1cc1,E2f7,Pnpt1,Upf2,Cadm1,Dut,Pkd2,Lims1,Jarid2,Fpgs,Srsf1
16_Member	GO Biological Processes	GO:0031100	animal organ regeneration	-3.01855	-1.72828	32/152	24240,24252,24329,24577,25664,29146,29285,29535,29667,54251,58853,58919,58935,60584,81643,81765,81810,83807,84399,89830,114494,114851,140588,161452,295347,307641,311642,312299,360992,361271,687266,689890	Cad,Cebpa,Egfr,Myc,Pparg,Jag1,Rps15,Pdx1,Srsf5,Flt1,Nr4a3,Ccnd1,Gas6,Lif,Atic,Rpl13,Tgfbr2,Ybx3,Ihh,Ptch1,Ccna2,Cdkn1a,Gli3,Lef1,Rap1a,Csnk2a2,Sulf2,Ezh2,Pnpt1,Upf2,Fpgs,Srsf1
16_Member	GO Biological Processes	GO:0031099	regeneration	-2.52535	-1.34331	51/290	24225,24240,24252,24329,24516,24577,24587,25529,25664,29146,29285,29535,29667,54251,54254,58853,58919,58935,58950,59323,60584,81643,81649,81765,81810,83807,84399,84468,89830,113912,114486,114494,114851,117255,140588,161452,192363,266608,295347,307641,308739,311642,312299,316539,360992,361271,432358,500574,687266,689890,100360552	Bdnf,Cad,Cebpa,Egfr,Jun,Myc,Nefh,Ptprs,Pparg,Jag1,Rps15,Pdx1,Srsf5,Flt1,Gata4,Nr4a3,Ccnd1,Gas6,Fkbp1b,Erbb4,Lif,Atic,Mapk14,Rpl13,Tgfbr2,Ybx3,Ihh,Chst3,Ptch1,Rtn4r,Braf,Ccna2,Cdkn1a,Ptpn12,Gli3,Lef1,Nos1ap,Fzd9,Rap1a,Csnk2a2,Rgma,Sulf2,Ezh2,Epha4,Pnpt1,Upf2,Elavl4,Pax7,Fpgs,Srsf1,Fzd7
16_Member	GO Biological Processes	GO:0097421	liver regeneration	-2.45906	-1.29056	16/65	24329,24577,29285,29667,54251,58919,81765,84399,89830,140588,295347,307641,311642,312299,360992,689890	Egfr,Myc,Rps15,Srsf5,Flt1,Ccnd1,Rpl13,Ihh,Ptch1,Gli3,Rap1a,Csnk2a2,Sulf2,Ezh2,Pnpt1,Srsf1
17_Summary	GO Biological Processes	GO:0048736	appendage development	-13.9306	-11.3454	64/195	24705,24817,25022,25304,25444,25495,25546,25724,29349,50566,54284,64547,64566,81666,81809,84399,84577,89830,113983,113984,114029,114213,114517,116499,140588,161452,282581,282635,287102,288154,288155,289392,296511,297893,298878,299499,301285,303399,304514,304947,306782,306862,307740,310418,310552,312495,312974,313488,313757,314694,315039,353252,353305,361930,361938,364712,364910,406164,500023,5008…	Rara,Hnf1a,Fgfr2,Comp,Fgf9,Nog,Shox2,Itgb4,Fgf8,Grem1,Pitx2,Bcl2l11,Wnt5a,Gnaq,Tgfb2,Ihh,Hdac2,Ptch1,Pitx1,Nr2f2,Megf8,Rax,Itga6,Fgf4,Gli3,Lef1,Fzd6,Mbnl1,Kremen2,Hoxd13,Evx2,Plxna2,Alx4,Hdac1,Osr1,Sp8,Tfap2b,Tbx4,Tbx5,Pbx1,Ror2,Tfap2a,Sall1,Frem2,Sfrp2,Cyp26b1,Chd7,Reck,Ski,Chst11,Osr2,Rdh10,Tbx3,Bbs7,Intu,Sox4,Sall3,Pbx2,Dlx6,Rspo2,Gas1,Flvcr1,Hoxd9,Tbc1d32
17_Member	GO Biological Processes	GO:0048736	appendage development	-13.9306	-11.3454	64/195	24705,24817,25022,25304,25444,25495,25546,25724,29349,50566,54284,64547,64566,81666,81809,84399,84577,89830,113983,113984,114029,114213,114517,116499,140588,161452,282581,282635,287102,288154,288155,289392,296511,297893,298878,299499,301285,303399,304514,304947,306782,306862,307740,310418,310552,312495,312974,313488,313757,314694,315039,353252,353305,361930,361938,364712,364910,406164,500023,5008…	Rara,Hnf1a,Fgfr2,Comp,Fgf9,Nog,Shox2,Itgb4,Fgf8,Grem1,Pitx2,Bcl2l11,Wnt5a,Gnaq,Tgfb2,Ihh,Hdac2,Ptch1,Pitx1,Nr2f2,Megf8,Rax,Itga6,Fgf4,Gli3,Lef1,Fzd6,Mbnl1,Kremen2,Hoxd13,Evx2,Plxna2,Alx4,Hdac1,Osr1,Sp8,Tfap2b,Tbx4,Tbx5,Pbx1,Ror2,Tfap2a,Sall1,Frem2,Sfrp2,Cyp26b1,Chd7,Reck,Ski,Chst11,Osr2,Rdh10,Tbx3,Bbs7,Intu,Sox4,Sall3,Pbx2,Dlx6,Rspo2,Gas1,Flvcr1,Hoxd9,Tbc1d32
17_Member	GO Biological Processes	GO:0060173	limb development	-13.9306	-11.3454	64/195	24705,24817,25022,25304,25444,25495,25546,25724,29349,50566,54284,64547,64566,81666,81809,84399,84577,89830,113983,113984,114029,114213,114517,116499,140588,161452,282581,282635,287102,288154,288155,289392,296511,297893,298878,299499,301285,303399,304514,304947,306782,306862,307740,310418,310552,312495,312974,313488,313757,314694,315039,353252,353305,361930,361938,364712,364910,406164,500023,5008…	Rara,Hnf1a,Fgfr2,Comp,Fgf9,Nog,Shox2,Itgb4,Fgf8,Grem1,Pitx2,Bcl2l11,Wnt5a,Gnaq,Tgfb2,Ihh,Hdac2,Ptch1,Pitx1,Nr2f2,Megf8,Rax,Itga6,Fgf4,Gli3,Lef1,Fzd6,Mbnl1,Kremen2,Hoxd13,Evx2,Plxna2,Alx4,Hdac1,Osr1,Sp8,Tfap2b,Tbx4,Tbx5,Pbx1,Ror2,Tfap2a,Sall1,Frem2,Sfrp2,Cyp26b1,Chd7,Reck,Ski,Chst11,Osr2,Rdh10,Tbx3,Bbs7,Intu,Sox4,Sall3,Pbx2,Dlx6,Rspo2,Gas1,Flvcr1,Hoxd9,Tbc1d32
17_Member	GO Biological Processes	GO:0035107	appendage morphogenesis	-12.2321	-9.83804	56/171	24817,25022,25444,25495,25546,29349,50566,54284,64547,64566,81666,81809,84399,84577,89830,113983,114029,116499,140588,161452,282581,282635,288154,288155,289392,296511,297893,298878,299499,301285,303399,304514,304947,306782,306862,307740,310418,310552,312495,312974,313488,313757,314694,315039,353252,353305,361938,364712,364910,406164,500023,500863,683470,683955,688999,100359595	Hnf1a,Fgfr2,Fgf9,Nog,Shox2,Fgf8,Grem1,Pitx2,Bcl2l11,Wnt5a,Gnaq,Tgfb2,Ihh,Hdac2,Ptch1,Pitx1,Megf8,Fgf4,Gli3,Lef1,Fzd6,Mbnl1,Hoxd13,Evx2,Plxna2,Alx4,Hdac1,Osr1,Sp8,Tfap2b,Tbx4,Tbx5,Pbx1,Ror2,Tfap2a,Sall1,Frem2,Sfrp2,Cyp26b1,Chd7,Reck,Ski,Chst11,Osr2,Rdh10,Tbx3,Intu,Sox4,Sall3,Pbx2,Dlx6,Rspo2,Gas1,Flvcr1,Hoxd9,Tbc1d32
17_Member	GO Biological Processes	GO:0035108	limb morphogenesis	-12.2321	-9.83804	56/171	24817,25022,25444,25495,25546,29349,50566,54284,64547,64566,81666,81809,84399,84577,89830,113983,114029,116499,140588,161452,282581,282635,288154,288155,289392,296511,297893,298878,299499,301285,303399,304514,304947,306782,306862,307740,310418,310552,312495,312974,313488,313757,314694,315039,353252,353305,361938,364712,364910,406164,500023,500863,683470,683955,688999,100359595	Hnf1a,Fgfr2,Fgf9,Nog,Shox2,Fgf8,Grem1,Pitx2,Bcl2l11,Wnt5a,Gnaq,Tgfb2,Ihh,Hdac2,Ptch1,Pitx1,Megf8,Fgf4,Gli3,Lef1,Fzd6,Mbnl1,Hoxd13,Evx2,Plxna2,Alx4,Hdac1,Osr1,Sp8,Tfap2b,Tbx4,Tbx5,Pbx1,Ror2,Tfap2a,Sall1,Frem2,Sfrp2,Cyp26b1,Chd7,Reck,Ski,Chst11,Osr2,Rdh10,Tbx3,Intu,Sox4,Sall3,Pbx2,Dlx6,Rspo2,Gas1,Flvcr1,Hoxd9,Tbc1d32
17_Member	GO Biological Processes	GO:0030326	embryonic limb morphogenesis	-11.9503	-9.56804	50/145	24817,25444,25495,25546,29349,50566,54284,64547,64566,81666,81809,84399,84577,89830,113983,114029,116499,140588,161452,282581,282635,288154,296511,297893,298878,299499,303399,304514,304947,306782,306862,307740,310418,310552,312495,312974,313488,313757,314694,315039,353252,353305,361938,406164,500023,500863,683470,683955,688999,100359595	Hnf1a,Fgf9,Nog,Shox2,Fgf8,Grem1,Pitx2,Bcl2l11,Wnt5a,Gnaq,Tgfb2,Ihh,Hdac2,Ptch1,Pitx1,Megf8,Fgf4,Gli3,Lef1,Fzd6,Mbnl1,Hoxd13,Alx4,Hdac1,Osr1,Sp8,Tbx4,Tbx5,Pbx1,Ror2,Tfap2a,Sall1,Frem2,Sfrp2,Cyp26b1,Chd7,Reck,Ski,Chst11,Osr2,Rdh10,Tbx3,Intu,Pbx2,Dlx6,Rspo2,Gas1,Flvcr1,Hoxd9,Tbc1d32
17_Member	GO Biological Processes	GO:0035113	embryonic appendage morphogenesis	-11.9503	-9.56804	50/145	24817,25444,25495,25546,29349,50566,54284,64547,64566,81666,81809,84399,84577,89830,113983,114029,116499,140588,161452,282581,282635,288154,296511,297893,298878,299499,303399,304514,304947,306782,306862,307740,310418,310552,312495,312974,313488,313757,314694,315039,353252,353305,361938,406164,500023,500863,683470,683955,688999,100359595	Hnf1a,Fgf9,Nog,Shox2,Fgf8,Grem1,Pitx2,Bcl2l11,Wnt5a,Gnaq,Tgfb2,Ihh,Hdac2,Ptch1,Pitx1,Megf8,Fgf4,Gli3,Lef1,Fzd6,Mbnl1,Hoxd13,Alx4,Hdac1,Osr1,Sp8,Tbx4,Tbx5,Pbx1,Ror2,Tfap2a,Sall1,Frem2,Sfrp2,Cyp26b1,Chd7,Reck,Ski,Chst11,Osr2,Rdh10,Tbx3,Intu,Pbx2,Dlx6,Rspo2,Gas1,Flvcr1,Hoxd9,Tbc1d32
17_Member	GO Biological Processes	GO:0042733	embryonic digit morphogenesis	-5.33366	-3.62409	23/71	25495,64547,64566,81666,84399,84577,140588,282581,288154,296511,297893,298878,306782,307740,310418,310552,314694,315039,353305,361938,683470,683955,100359595	Nog,Bcl2l11,Wnt5a,Gnaq,Ihh,Hdac2,Gli3,Fzd6,Hoxd13,Alx4,Hdac1,Osr1,Ror2,Sall1,Frem2,Sfrp2,Chst11,Osr2,Tbx3,Intu,Gas1,Flvcr1,Tbc1d32
17_Member	GO Biological Processes	GO:0035137	hindlimb morphogenesis	-3.96887	-2.48164	15/44	29349,54284,89830,113983,116499,296511,298878,301285,307740,312974,315039,353305,364910,500863,688999	Fgf8,Pitx2,Ptch1,Pitx1,Fgf4,Alx4,Osr1,Tfap2b,Sall1,Chd7,Osr2,Tbx3,Sall3,Rspo2,Hoxd9
17_Member	GO Biological Processes	GO:0035136	forelimb morphogenesis	-3.27543	-1.93243	14/45	25546,296511,298878,301285,304514,306862,307740,313488,315039,353252,353305,364910,500863,688999	Shox2,Alx4,Osr1,Tfap2b,Tbx5,Tfap2a,Sall1,Reck,Osr2,Rdh10,Tbx3,Sall3,Rspo2,Hoxd9
17_Member	GO Biological Processes	GO:0035115	embryonic forelimb morphogenesis	-2.61689	-1.4153	11/36	25546,296511,298878,304514,306862,313488,315039,353252,353305,500863,688999	Shox2,Alx4,Osr1,Tbx5,Tfap2a,Reck,Osr2,Rdh10,Tbx3,Rspo2,Hoxd9
17_Member	GO Biological Processes	GO:0035116	embryonic hindlimb morphogenesis	-2.29234	-1.15722	10/34	29349,54284,113983,116499,296511,298878,312974,315039,353305,500863	Fgf8,Pitx2,Pitx1,Fgf4,Alx4,Osr1,Chd7,Osr2,Tbx3,Rspo2
18_Summary	GO Biological Processes	GO:0043549	regulation of kinase activity	-13.4368	-10.9119	169/799	24166,24174,24318,24329,24337,24628,24672,24680,24705,24771,24827,24954,25022,25099,25112,25164,25266,25267,25288,25467,25513,25603,25621,25675,25696,25744,29151,29157,29338,29398,29402,29477,29496,29645,29741,29753,50566,54251,54287,54308,54348,56718,58919,58935,59114,59323,60587,64031,64226,64390,64468,64566,64666,65028,65218,66025,78965,78969,81666,81809,81810,83476,83506,84489,113984,114486,1…	Adcyap1,Adra2b,Drd2,Egfr,Erbb2,Pdgfb,Ppp2ca,Prkca,Rara,Sdc4,Tgfa,Insr,Fgfr2,Foxa2,Gadd45a,Cdkn2b,Pdgfa,Pdgfra,Acsl1,Irs1,Pik3r1,Marcks,Cd81,Hmgcr,Vldlr,Nf2,Ucn,Ccng2,Prdx2,Stk10,Unc119,Mapt,Erbb3,Ptprj,Pik3r2,Ywhae,Grem1,Flt1,Eif2ak2,Slk,Stk39,Mtor,Ccnd1,Gas6,Slc9a3r1,Erbb4,Dusp4,Pdcd4,Mlst8,Prpsap1,Hyal2,Wnt5a,Taok2,Dnaja1,Agap2,Lpar3,Csf1,Trib1,Gnaq,Tgfb2,Tgfbr2,Cyr61,Camkk2,Fgfr3,Nr2f2,Braf,Cc…
18_Member	GO Biological Processes	GO:0043549	regulation of kinase activity	-13.4368	-10.9119	169/799	24166,24174,24318,24329,24337,24628,24672,24680,24705,24771,24827,24954,25022,25099,25112,25164,25266,25267,25288,25467,25513,25603,25621,25675,25696,25744,29151,29157,29338,29398,29402,29477,29496,29645,29741,29753,50566,54251,54287,54308,54348,56718,58919,58935,59114,59323,60587,64031,64226,64390,64468,64566,64666,65028,65218,66025,78965,78969,81666,81809,81810,83476,83506,84489,113984,114486,1…	Adcyap1,Adra2b,Drd2,Egfr,Erbb2,Pdgfb,Ppp2ca,Prkca,Rara,Sdc4,Tgfa,Insr,Fgfr2,Foxa2,Gadd45a,Cdkn2b,Pdgfa,Pdgfra,Acsl1,Irs1,Pik3r1,Marcks,Cd81,Hmgcr,Vldlr,Nf2,Ucn,Ccng2,Prdx2,Stk10,Unc119,Mapt,Erbb3,Ptprj,Pik3r2,Ywhae,Grem1,Flt1,Eif2ak2,Slk,Stk39,Mtor,Ccnd1,Gas6,Slc9a3r1,Erbb4,Dusp4,Pdcd4,Mlst8,Prpsap1,Hyal2,Wnt5a,Taok2,Dnaja1,Agap2,Lpar3,Csf1,Trib1,Gnaq,Tgfb2,Tgfbr2,Cyr61,Camkk2,Fgfr3,Nr2f2,Braf,Cc…
18_Member	GO Biological Processes	GO:0045859	regulation of protein kinase activity	-11.554	-9.20515	148/705	24166,24174,24318,24329,24337,24628,24672,24680,24771,24827,24954,25112,25164,25266,25288,25603,25621,25675,25696,25744,29151,29157,29338,29398,29402,29496,29645,29753,50566,54251,54287,54308,54348,56718,58919,58935,59114,60587,64031,64226,64468,64566,64666,65028,65218,66025,78965,78969,81666,81809,81810,83476,83506,113984,114486,114494,114633,114851,116457,116477,116546,116596,116671,116744,1405…	Adcyap1,Adra2b,Drd2,Egfr,Erbb2,Pdgfb,Ppp2ca,Prkca,Sdc4,Tgfa,Insr,Gadd45a,Cdkn2b,Pdgfa,Acsl1,Marcks,Cd81,Hmgcr,Vldlr,Nf2,Ucn,Ccng2,Prdx2,Stk10,Unc119,Erbb3,Ptprj,Ywhae,Grem1,Flt1,Eif2ak2,Slk,Stk39,Mtor,Ccnd1,Gas6,Slc9a3r1,Dusp4,Pdcd4,Mlst8,Hyal2,Wnt5a,Taok2,Dnaja1,Agap2,Lpar3,Csf1,Trib1,Gnaq,Tgfb2,Tgfbr2,Cyr61,Camkk2,Nr2f2,Braf,Ccna2,Plce1,Cdkn1a,Mapk8ip1,Wnk1,Ralb,Map3k8,Cdk5r1,Lpar1,Wnt11,Cdc25b…
18_Member	GO Biological Processes	GO:0051347	positive regulation of transferase activity	-9.9994	-7.76324	128/611	24166,24174,24318,24329,24337,24577,24628,24672,24771,24827,24954,25022,25112,25266,25267,25288,25467,25603,25621,25696,29151,29338,29374,29398,29402,29496,50566,54251,54287,54308,54348,58919,58935,59323,64226,64566,64666,65218,66025,78965,81809,81810,83476,83506,84489,114486,114592,114633,114851,116477,116546,116596,116671,116744,140584,171103,171115,171287,171492,192126,246174,246282,286993,287…	Adcyap1,Adra2b,Drd2,Egfr,Erbb2,Myc,Pdgfb,Ppp2ca,Sdc4,Tgfa,Insr,Fgfr2,Gadd45a,Pdgfa,Pdgfra,Acsl1,Irs1,Marcks,Cd81,Vldlr,Ucn,Prdx2,Cct4,Stk10,Unc119,Erbb3,Grem1,Flt1,Eif2ak2,Slk,Stk39,Ccnd1,Gas6,Erbb4,Mlst8,Wnt5a,Taok2,Agap2,Lpar3,Csf1,Tgfb2,Tgfbr2,Cyr61,Camkk2,Fgfr3,Braf,Aurkb,Plce1,Cdkn1a,Wnk1,Ralb,Map3k8,Cdk5r1,Lpar1,Wnt11,Cdc25b,Pde5a,Epha7,Map3k2,Dab2ip,Fgd4,Zfp91,Taok1,Stub1,Hsph1,Vangl2,Ppp1…
18_Member	GO Biological Processes	GO:0071900	regulation of protein serine/threonine kinase activity	-9.77728	-7.57684	103/461	24174,24329,24337,24628,24672,24680,24827,24954,25112,25164,25266,25288,25603,25621,25675,29157,29338,29645,29753,54251,54287,54348,58919,60587,64031,64226,64468,64566,64666,65028,66025,78969,113984,114486,114494,114633,114851,116457,116477,116546,116596,116671,116744,171109,171115,171492,192126,192350,246174,286993,289229,292925,293621,298686,300235,300980,301252,301574,303811,305922,306141,3067…	Adra2b,Egfr,Erbb2,Pdgfb,Ppp2ca,Prkca,Tgfa,Insr,Gadd45a,Cdkn2b,Pdgfa,Acsl1,Marcks,Cd81,Hmgcr,Ccng2,Prdx2,Ptprj,Ywhae,Flt1,Eif2ak2,Stk39,Ccnd1,Dusp4,Pdcd4,Mlst8,Hyal2,Wnt5a,Taok2,Dnaja1,Lpar3,Trib1,Nr2f2,Braf,Ccna2,Plce1,Cdkn1a,Mapk8ip1,Wnk1,Ralb,Map3k8,Cdk5r1,Lpar1,Dusp5,Pde5a,Map3k2,Dab2ip,Cdk12,Fgd4,Taok1,Vangl2,Tsg101,Hras,Ccnl2,Dazap2,Dusp7,Hsp90ab1,Cab39,Dvl3,Lats2,Spry2,Ror2,Ripk1,Lats1,Map3…
18_Member	GO Biological Processes	GO:0033674	positive regulation of kinase activity	-9.38725	-7.2127	115/542	24166,24174,24318,24329,24337,24628,24672,24771,24827,24954,25022,25112,25266,25267,25288,25467,25603,25621,25696,29151,29338,29398,29402,29496,50566,54251,54287,54308,54348,58919,58935,59323,64226,64566,64666,65218,66025,78965,81809,81810,83476,83506,84489,114486,114633,114851,116477,116546,116596,116671,116744,140584,171103,171115,171287,171492,192126,246174,246282,286993,288444,289229,292130,2…	Adcyap1,Adra2b,Drd2,Egfr,Erbb2,Pdgfb,Ppp2ca,Sdc4,Tgfa,Insr,Fgfr2,Gadd45a,Pdgfa,Pdgfra,Acsl1,Irs1,Marcks,Cd81,Vldlr,Ucn,Prdx2,Stk10,Unc119,Erbb3,Grem1,Flt1,Eif2ak2,Slk,Stk39,Ccnd1,Gas6,Erbb4,Mlst8,Wnt5a,Taok2,Agap2,Lpar3,Csf1,Tgfb2,Tgfbr2,Cyr61,Camkk2,Fgfr3,Braf,Plce1,Cdkn1a,Wnk1,Ralb,Map3k8,Cdk5r1,Lpar1,Wnt11,Cdc25b,Pde5a,Epha7,Map3k2,Dab2ip,Fgd4,Zfp91,Taok1,Hsph1,Vangl2,Afap1l2,Sh3glb1,Hras,Ranb…
18_Member	GO Biological Processes	GO:0045860	positive regulation of protein kinase activity	-8.57519	-6.48811	101/471	24166,24174,24318,24329,24337,24628,24672,24771,24827,24954,25112,25266,25288,25603,25621,25696,29151,29338,29398,29402,29496,50566,54251,54287,54308,54348,58919,58935,64226,64566,64666,65218,66025,78965,81809,81810,83476,83506,114486,114633,114851,116477,116546,116596,116671,116744,140584,171103,171115,171492,192126,246174,246282,286993,288444,289229,292130,293621,295347,298686,300235,301252,301…	Adcyap1,Adra2b,Drd2,Egfr,Erbb2,Pdgfb,Ppp2ca,Sdc4,Tgfa,Insr,Gadd45a,Pdgfa,Acsl1,Marcks,Cd81,Vldlr,Ucn,Prdx2,Stk10,Unc119,Erbb3,Grem1,Flt1,Eif2ak2,Slk,Stk39,Ccnd1,Gas6,Mlst8,Wnt5a,Taok2,Agap2,Lpar3,Csf1,Tgfb2,Tgfbr2,Cyr61,Camkk2,Braf,Plce1,Cdkn1a,Wnk1,Ralb,Map3k8,Cdk5r1,Lpar1,Wnt11,Cdc25b,Pde5a,Map3k2,Dab2ip,Fgd4,Zfp91,Taok1,Hsph1,Vangl2,Afap1l2,Hras,Rap1a,Ccnl2,Dazap2,Hsp90ab1,Cab39,Wnt3a,Dvl3,Ccd…
18_Member	GO Biological Processes	GO:0080135	regulation of cellular response to stress	-7.2151	-5.27997	121/629	24329,24336,24577,24654,24874,25112,25506,25513,25529,25675,29215,29244,29477,29535,29560,29657,29884,50566,54254,54287,58853,58950,59265,59303,64031,64157,64513,64566,64666,65028,66026,79255,81528,81809,83619,83807,84017,84482,113912,114208,114483,114486,116457,116646,116677,117062,117254,117282,171071,192126,246174,252834,252855,266668,286900,286993,287765,288444,289229,289372,289874,290744,290…	Egfr,Epor,Myc,Plcb1,Vhl,Gadd45a,P4hb,Pik3r1,Ptprs,Hmgcr,Arg2,Gch1,Mapt,Pdx1,Hif1a,Arntl,Bok,Grem1,Gata4,Eif2ak2,Nr4a3,Fkbp1b,Phlpp1,Tmem33,Pdcd4,Ddah1,Pawr,Wnt5a,Taok2,Dnaja1,Trpv4,Atf4,Ogg1,Tgfb2,Nfe2l2,Ybx3,Hmga2,Foxo1,Rtn4r,Skil,Cdk6,Braf,Mapk8ip1,Tpt1,F2rl1,Hmga1,Prdx1,Hnrnpk,Ppp1r15a,Dab2ip,Fgd4,Gdf6,Sfpq,Grina,Selenos,Taok1,Ddx5,Hsph1,Vangl2,Smyd2,Erlec1,Ing2,Qars,Zmynd11,Eya4,Hras,Ube2g2,F…
18_Member	GO Biological Processes	GO:0043408	regulation of MAPK cascade	-6.96335	-5.06962	138/749	24166,24174,24318,24329,24336,24337,24516,24577,24628,24654,24680,24705,24827,24954,25022,25112,25196,25266,25267,25444,25464,25621,25661,25667,25675,25744,29338,29349,29496,29645,29741,50566,54251,54254,54287,54348,58935,59114,59265,59323,60584,60587,64031,64457,64468,64566,64666,65028,66025,66026,78969,81504,81809,83476,83501,84482,84489,114486,114633,116457,116499,116596,116677,116744,117254,1…	Adcyap1,Adra2b,Drd2,Egfr,Epor,Erbb2,Jun,Myc,Pdgfb,Plcb1,Prkca,Rara,Tgfa,Insr,Fgfr2,Gadd45a,Inhbb,Pdgfa,Pdgfra,Fgf9,Icam1,Cd81,Fn1,Bmp3,Hmgcr,Nf2,Prdx2,Fgf8,Erbb3,Ptprj,Pik3r2,Grem1,Flt1,Gata4,Eif2ak2,Stk39,Gas6,Slc9a3r1,Phlpp1,Erbb4,Lif,Dusp4,Pdcd4,Ndrg4,Hyal2,Wnt5a,Taok2,Dnaja1,Lpar3,Trpv4,Trib1,Grb2,Tgfb2,Cyr61,Cdh2,Foxo1,Fgfr3,Braf,Plce1,Mapk8ip1,Fgf4,Map3k8,F2rl1,Lpar1,Prdx1,Il11,Dusp5,Pde5a,…
18_Member	GO Biological Processes	GO:0051403	stress-activated MAPK cascade	-6.54327	-4.70588	59/253	24329,24577,24654,25112,25675,29513,50566,54287,59265,64031,64566,64666,65028,66026,78969,79426,81649,81809,84023,84482,84489,116457,116677,117254,192126,246174,252834,286993,288444,289229,290868,291259,293621,301346,303811,306782,306886,308463,309168,309377,310552,311245,312927,313587,315196,315220,316539,361242,361388,362325,363062,363913,365037,365057,498013,498950,500690,501146,689314	Egfr,Myc,Plcb1,Gadd45a,Hmgcr,Mapk13,Grem1,Eif2ak2,Phlpp1,Pdcd4,Wnt5a,Taok2,Dnaja1,Trpv4,Trib1,Zfp36,Mapk14,Tgfb2,Ptger4,Foxo1,Fgfr3,Mapk8ip1,F2rl1,Prdx1,Dab2ip,Fgd4,Gdf6,Taok1,Hsph1,Vangl2,Qars,Zmynd11,Hras,Sema4c,Dvl3,Ror2,Ripk1,Map3k10,Map3k11,Sfrp5,Sfrp2,Traf6,Rb1cc1,Zc3h12a,Wnt7b,Mapk8ip2,Epha4,Dusp22,Gab1,Mdfic,Dixdc1,Fzd10,Sash1,Map3k5,Ern1,Marveld3,Map3k9,Stradb,Mapk11
18_Member	GO Biological Processes	GO:0031098	stress-activated protein kinase signaling cascade	-6.17966	-4.37717	59/259	24329,24577,24654,25112,25675,29513,50566,54287,59265,64031,64566,64666,65028,66026,78969,79426,81649,81809,84023,84482,84489,116457,116677,117254,192126,246174,252834,286993,288444,289229,290868,291259,293621,301346,303811,306782,306886,308463,309168,309377,310552,311245,312927,313587,315196,315220,316539,361242,361388,362325,363062,363913,365037,365057,498013,498950,500690,501146,689314	Egfr,Myc,Plcb1,Gadd45a,Hmgcr,Mapk13,Grem1,Eif2ak2,Phlpp1,Pdcd4,Wnt5a,Taok2,Dnaja1,Trpv4,Trib1,Zfp36,Mapk14,Tgfb2,Ptger4,Foxo1,Fgfr3,Mapk8ip1,F2rl1,Prdx1,Dab2ip,Fgd4,Gdf6,Taok1,Hsph1,Vangl2,Qars,Zmynd11,Hras,Sema4c,Dvl3,Ror2,Ripk1,Map3k10,Map3k11,Sfrp5,Sfrp2,Traf6,Rb1cc1,Zc3h12a,Wnt7b,Mapk8ip2,Epha4,Dusp22,Gab1,Mdfic,Dixdc1,Fzd10,Sash1,Map3k5,Ern1,Marveld3,Map3k9,Stradb,Mapk11
18_Member	GO Biological Processes	GO:0071902	positive regulation of protein serine/threonine kinase activity	-5.47067	-3.74225	66/315	24174,24329,24337,24628,24672,24827,24954,25112,25266,25288,25603,25621,29338,54251,54287,54348,58919,64226,64566,64666,66025,114486,114633,116546,116596,116671,116744,171115,171492,192126,246174,286993,289229,293621,298686,300235,301252,301574,303811,306141,306782,306886,308463,309168,310533,311245,312299,314612,314621,315196,315291,316452,316539,360820,361261,361388,362325,363913,365037,365057,…	Adra2b,Egfr,Erbb2,Pdgfb,Ppp2ca,Tgfa,Insr,Gadd45a,Pdgfa,Acsl1,Marcks,Cd81,Prdx2,Flt1,Eif2ak2,Stk39,Ccnd1,Mlst8,Wnt5a,Taok2,Lpar3,Braf,Plce1,Ralb,Map3k8,Cdk5r1,Lpar1,Pde5a,Map3k2,Dab2ip,Fgd4,Taok1,Vangl2,Hras,Ccnl2,Dazap2,Hsp90ab1,Cab39,Dvl3,Spry2,Ror2,Ripk1,Map3k10,Map3k11,Rapgef2,Traf6,Ezh2,Shc2,Stk11,Wnt7b,Ccnt1,Ccnyl1,Epha4,Pxn,Ccny,Gab1,Mdfic,Fzd10,Sash1,Map3k5,Ern1,Pkd2,Cks2,Cks1b,Map3k9,Map4…
18_Member	GO Biological Processes	GO:0043410	positive regulation of MAPK cascade	-5.32246	-3.61534	99/533	24166,24174,24318,24329,24336,24337,24516,24628,24654,24680,24705,24827,24954,25022,25112,25266,25267,25444,25464,25621,25675,29338,29349,29496,54251,54254,54287,54348,58935,59323,60584,64457,64566,64666,66025,66026,81809,83501,84489,114486,114633,116457,116499,116596,116677,116744,171040,171115,171287,171492,192126,246174,252834,282843,286993,287464,289229,293621,295347,296456,299609,300455,3013…	Adcyap1,Adra2b,Drd2,Egfr,Epor,Erbb2,Jun,Pdgfb,Plcb1,Prkca,Rara,Tgfa,Insr,Fgfr2,Gadd45a,Pdgfa,Pdgfra,Fgf9,Icam1,Cd81,Hmgcr,Prdx2,Fgf8,Erbb3,Flt1,Gata4,Eif2ak2,Stk39,Gas6,Erbb4,Lif,Ndrg4,Wnt5a,Taok2,Lpar3,Trpv4,Tgfb2,Cdh2,Fgfr3,Braf,Plce1,Mapk8ip1,Fgf4,Map3k8,F2rl1,Lpar1,Il11,Pde5a,Epha7,Map3k2,Dab2ip,Fgd4,Gdf6,Sorbs3,Taok1,Dhx33,Vangl2,Hras,Rap1a,Itgav,Abca7,Bmper,Sema4c,Wwc1,Dvl3,Spry2,Ror2,Ripk1…
18_Member	GO Biological Processes	GO:0032872	regulation of stress-activated MAPK cascade	-5.25207	-3.55103	51/227	24329,24577,24654,25112,25675,50566,54287,59265,64031,64566,64666,65028,66026,81809,84482,116457,116677,117254,192126,246174,252834,286993,288444,289229,290868,291259,293621,301346,303811,306782,306886,308463,309168,309377,310552,311245,312927,313587,315196,315220,316539,361242,361388,362325,363062,363913,365037,365057,498013,498950,500690	Egfr,Myc,Plcb1,Gadd45a,Hmgcr,Grem1,Eif2ak2,Phlpp1,Pdcd4,Wnt5a,Taok2,Dnaja1,Trpv4,Tgfb2,Foxo1,Mapk8ip1,F2rl1,Prdx1,Dab2ip,Fgd4,Gdf6,Taok1,Hsph1,Vangl2,Qars,Zmynd11,Hras,Sema4c,Dvl3,Ror2,Ripk1,Map3k10,Map3k11,Sfrp5,Sfrp2,Traf6,Rb1cc1,Zc3h12a,Wnt7b,Mapk8ip2,Epha4,Dusp22,Gab1,Mdfic,Dixdc1,Fzd10,Sash1,Map3k5,Ern1,Marveld3,Map3k9
18_Member	GO Biological Processes	GO:0070302	regulation of stress-activated protein kinase signaling cascade	-5.19486	-3.50292	51/228	24329,24577,24654,25112,25675,50566,54287,59265,64031,64566,64666,65028,66026,81809,84482,116457,116677,117254,192126,246174,252834,286993,288444,289229,290868,291259,293621,301346,303811,306782,306886,308463,309168,309377,310552,311245,312927,313587,315196,315220,316539,361242,361388,362325,363062,363913,365037,365057,498013,498950,500690	Egfr,Myc,Plcb1,Gadd45a,Hmgcr,Grem1,Eif2ak2,Phlpp1,Pdcd4,Wnt5a,Taok2,Dnaja1,Trpv4,Tgfb2,Foxo1,Mapk8ip1,F2rl1,Prdx1,Dab2ip,Fgd4,Gdf6,Taok1,Hsph1,Vangl2,Qars,Zmynd11,Hras,Sema4c,Dvl3,Ror2,Ripk1,Map3k10,Map3k11,Sfrp5,Sfrp2,Traf6,Rb1cc1,Zc3h12a,Wnt7b,Mapk8ip2,Epha4,Dusp22,Gab1,Mdfic,Dixdc1,Fzd10,Sash1,Map3k5,Ern1,Marveld3,Map3k9
18_Member	GO Biological Processes	GO:0043405	regulation of MAP kinase activity	-5.07438	-3.39567	65/317	24174,24329,24337,24628,24680,24827,24954,25112,25266,25621,25675,29338,29645,54251,54287,54348,60587,64031,64468,64566,64666,65028,66025,78969,114486,114633,116457,116596,116744,171109,171115,171492,192126,192350,246174,286993,289229,292925,293621,300980,303811,306141,306782,306886,308463,309168,309377,310552,311245,311406,312299,313633,313974,314612,315196,316539,360820,361388,362325,363913,365…	Adra2b,Egfr,Erbb2,Pdgfb,Prkca,Tgfa,Insr,Gadd45a,Pdgfa,Cd81,Hmgcr,Prdx2,Ptprj,Flt1,Eif2ak2,Stk39,Dusp4,Pdcd4,Hyal2,Wnt5a,Taok2,Dnaja1,Lpar3,Trib1,Braf,Plce1,Mapk8ip1,Map3k8,Lpar1,Dusp5,Pde5a,Map3k2,Dab2ip,Cdk12,Fgd4,Taok1,Vangl2,Tsg101,Hras,Dusp7,Dvl3,Spry2,Ror2,Ripk1,Map3k10,Map3k11,Sfrp5,Sfrp2,Traf6,Dusp2,Ezh2,Ephb2,Trib2,Shc2,Wnt7b,Epha4,Pxn,Gab1,Mdfic,Fzd10,Sash1,Map3k5,Ern1,Map3k9,Map4k5
18_Member	GO Biological Processes	GO:0032147	activation of protein kinase activity	-4.81807	-3.19014	57/272	24174,24318,24329,24628,24827,24954,25112,25621,29151,29338,29398,50566,54251,54287,54308,54348,58935,64566,64666,65218,66025,81809,81810,83506,114486,114633,116477,116596,116744,140584,171492,192126,246174,246282,286993,301574,305605,306886,308463,309168,311245,311860,314612,314621,315196,316064,360161,360820,361388,362325,365057,373545,498013,500690,501146,503027,100361138	Adra2b,Drd2,Egfr,Pdgfb,Tgfa,Insr,Gadd45a,Cd81,Ucn,Prdx2,Stk10,Grem1,Flt1,Eif2ak2,Slk,Stk39,Gas6,Wnt5a,Taok2,Agap2,Lpar3,Tgfb2,Tgfbr2,Camkk2,Braf,Plce1,Wnk1,Map3k8,Lpar1,Wnt11,Map3k2,Dab2ip,Fgd4,Zfp91,Taok1,Cab39,Ccdc88a,Ripk1,Map3k10,Map3k11,Traf6,Abl1,Shc2,Stk11,Wnt7b,Oxsr1,Nek6,Pxn,Gab1,Mdfic,Map3k5,Prkag2,Ern1,Map3k9,Stradb,Map4k5,Dgkq
18_Member	GO Biological Processes	GO:0032874	positive regulation of stress-activated MAPK cascade	-3.85642	-2.39773	36/161	24654,25112,25675,54287,64566,64666,66026,81809,116677,192126,246174,252834,286993,289229,293621,301346,303811,306782,306886,308463,309168,311245,312927,313587,315196,315220,316539,361242,361388,362325,363062,363913,365037,365057,498013,500690	Plcb1,Gadd45a,Hmgcr,Eif2ak2,Wnt5a,Taok2,Trpv4,Tgfb2,F2rl1,Dab2ip,Fgd4,Gdf6,Taok1,Vangl2,Hras,Sema4c,Dvl3,Ror2,Ripk1,Map3k10,Map3k11,Traf6,Rb1cc1,Zc3h12a,Wnt7b,Mapk8ip2,Epha4,Dusp22,Gab1,Mdfic,Dixdc1,Fzd10,Sash1,Map3k5,Ern1,Map3k9
18_Member	GO Biological Processes	GO:0007254	JNK cascade	-3.84323	-2.3866	42/198	24329,24654,25112,59265,64031,64566,64666,65028,66026,78969,84023,116457,116677,192126,246174,286993,289229,291259,293621,303811,306782,306886,308463,309168,309377,310552,311245,312927,315196,315220,316539,361242,361388,362325,363062,363913,365037,365057,498013,498950,500690,501146	Egfr,Plcb1,Gadd45a,Phlpp1,Pdcd4,Wnt5a,Taok2,Dnaja1,Trpv4,Trib1,Ptger4,Mapk8ip1,F2rl1,Dab2ip,Fgd4,Taok1,Vangl2,Zmynd11,Hras,Dvl3,Ror2,Ripk1,Map3k10,Map3k11,Sfrp5,Sfrp2,Traf6,Rb1cc1,Wnt7b,Mapk8ip2,Epha4,Dusp22,Gab1,Mdfic,Dixdc1,Fzd10,Sash1,Map3k5,Ern1,Marveld3,Map3k9,Stradb
18_Member	GO Biological Processes	GO:0070304	positive regulation of stress-activated protein kinase signaling cascade	-3.79946	-2.35969	36/162	24654,25112,25675,54287,64566,64666,66026,81809,116677,192126,246174,252834,286993,289229,293621,301346,303811,306782,306886,308463,309168,311245,312927,313587,315196,315220,316539,361242,361388,362325,363062,363913,365037,365057,498013,500690	Plcb1,Gadd45a,Hmgcr,Eif2ak2,Wnt5a,Taok2,Trpv4,Tgfb2,F2rl1,Dab2ip,Fgd4,Gdf6,Taok1,Vangl2,Hras,Sema4c,Dvl3,Ror2,Ripk1,Map3k10,Map3k11,Traf6,Rb1cc1,Zc3h12a,Wnt7b,Mapk8ip2,Epha4,Dusp22,Gab1,Mdfic,Dixdc1,Fzd10,Sash1,Map3k5,Ern1,Map3k9
18_Member	GO Biological Processes	GO:0046328	regulation of JNK cascade	-3.65813	-2.2409	39/183	24329,24654,25112,59265,64031,64566,64666,65028,66026,116457,116677,192126,246174,286993,289229,291259,293621,303811,306782,306886,308463,309168,309377,310552,311245,312927,315196,315220,316539,361242,361388,362325,363062,363913,365037,365057,498013,498950,500690	Egfr,Plcb1,Gadd45a,Phlpp1,Pdcd4,Wnt5a,Taok2,Dnaja1,Trpv4,Mapk8ip1,F2rl1,Dab2ip,Fgd4,Taok1,Vangl2,Zmynd11,Hras,Dvl3,Ror2,Ripk1,Map3k10,Map3k11,Sfrp5,Sfrp2,Traf6,Rb1cc1,Wnt7b,Mapk8ip2,Epha4,Dusp22,Gab1,Mdfic,Dixdc1,Fzd10,Sash1,Map3k5,Ern1,Marveld3,Map3k9
18_Member	GO Biological Processes	GO:0043506	regulation of JUN kinase activity	-3.58508	-2.17777	24/95	64031,64566,65028,116457,192126,246174,289229,303811,306782,306886,308463,309168,309377,310552,311245,315196,316539,361388,362325,363913,365037,365057,498013,500690	Pdcd4,Wnt5a,Dnaja1,Mapk8ip1,Dab2ip,Fgd4,Vangl2,Dvl3,Ror2,Ripk1,Map3k10,Map3k11,Sfrp5,Sfrp2,Traf6,Wnt7b,Epha4,Gab1,Mdfic,Fzd10,Sash1,Map3k5,Ern1,Map3k9
18_Member	GO Biological Processes	GO:0043406	positive regulation of MAP kinase activity	-3.30893	-1.95953	46/235	24174,24329,24337,24628,24827,24954,25112,25266,25621,29338,54251,54287,54348,64566,64666,66025,114486,114633,116596,116744,171115,171492,192126,246174,286993,289229,293621,303811,306782,306886,308463,309168,311245,312299,314612,315196,316539,360820,361388,362325,363913,365037,365057,498013,500690,503027	Adra2b,Egfr,Erbb2,Pdgfb,Tgfa,Insr,Gadd45a,Pdgfa,Cd81,Prdx2,Flt1,Eif2ak2,Stk39,Wnt5a,Taok2,Lpar3,Braf,Plce1,Map3k8,Lpar1,Pde5a,Map3k2,Dab2ip,Fgd4,Taok1,Vangl2,Hras,Dvl3,Ror2,Ripk1,Map3k10,Map3k11,Traf6,Ezh2,Shc2,Wnt7b,Epha4,Pxn,Gab1,Mdfic,Fzd10,Sash1,Map3k5,Ern1,Map3k9,Map4k5
18_Member	GO Biological Processes	GO:0046330	positive regulation of JNK cascade	-2.82984	-1.57707	29/137	24654,25112,64566,64666,66026,116677,192126,246174,286993,289229,293621,303811,306782,306886,308463,309168,311245,312927,315196,316539,361242,361388,362325,363062,363913,365037,365057,498013,500690	Plcb1,Gadd45a,Wnt5a,Taok2,Trpv4,F2rl1,Dab2ip,Fgd4,Taok1,Vangl2,Hras,Dvl3,Ror2,Ripk1,Map3k10,Map3k11,Traf6,Rb1cc1,Wnt7b,Epha4,Dusp22,Gab1,Mdfic,Dixdc1,Fzd10,Sash1,Map3k5,Ern1,Map3k9
18_Member	GO Biological Processes	GO:0043507	positive regulation of JUN kinase activity	-2.69053	-1.47141	19/79	64566,192126,246174,289229,303811,306782,306886,308463,309168,311245,315196,316539,361388,362325,363913,365037,365057,498013,500690	Wnt5a,Dab2ip,Fgd4,Vangl2,Dvl3,Ror2,Ripk1,Map3k10,Map3k11,Traf6,Wnt7b,Epha4,Gab1,Mdfic,Fzd10,Sash1,Map3k5,Ern1,Map3k9
18_Member	GO Biological Processes	GO:0007257	activation of JUN kinase activity	-2.4129	-1.25662	11/38	64566,192126,246174,306886,308463,309168,315196,361388,362325,498013,500690	Wnt5a,Dab2ip,Fgd4,Ripk1,Map3k10,Map3k11,Wnt7b,Gab1,Mdfic,Ern1,Map3k9
18_Member	GO Biological Processes	GO:0000187	activation of MAPK activity	-2.26065	-1.13939	24/117	24174,24827,24954,25621,29338,54348,64566,66025,114633,116744,171492,192126,246174,306886,308463,309168,314612,315196,360820,361388,362325,365057,498013,500690	Adra2b,Tgfa,Insr,Cd81,Prdx2,Stk39,Wnt5a,Lpar3,Plce1,Lpar1,Map3k2,Dab2ip,Fgd4,Ripk1,Map3k10,Map3k11,Shc2,Wnt7b,Pxn,Gab1,Mdfic,Map3k5,Ern1,Map3k9
18_Member	GO Biological Processes	GO:0070374	positive regulation of ERK1 and ERK2 cascade	-2.17359	-1.09131	43/246	24166,24318,24329,24336,24337,24516,24628,24680,24705,24954,25022,25266,25267,25464,25675,29349,29496,54251,54254,58935,59323,64457,66026,84489,114486,116499,116677,171287,293621,295347,299609,300455,306141,306782,310533,310553,311860,312275,313633,315673,316539,679819,686753	Adcyap1,Drd2,Egfr,Epor,Erbb2,Jun,Pdgfb,Prkca,Rara,Insr,Fgfr2,Pdgfa,Pdgfra,Icam1,Hmgcr,Fgf8,Erbb3,Flt1,Gata4,Gas6,Erbb4,Ndrg4,Trpv4,Fgfr3,Braf,Fgf4,F2rl1,Epha7,Hras,Rap1a,Abca7,Bmper,Spry2,Ror2,Rapgef2,Tlr2,Abl1,Ephb6,Ephb2,Tnfaip8l3,Epha4,Glipr2,Npnt
19_Summary	GO Biological Processes	GO:0043583	ear development	-13.0421	-10.5556	74/253	24225,24252,24388,24577,24771,25022,25266,25267,25444,25495,29146,29349,29553,29577,54264,54267,58853,59114,64547,64566,81809,84010,84489,85471,114494,114523,114634,116639,117955,140588,170671,170724,245960,266715,282581,289229,292172,293537,293538,293992,296272,298496,298555,298878,299138,299802,300128,300455,303181,303811,305880,306141,306782,306862,306934,307740,309860,310341,310418,312974,313…	Bdnf,Cebpa,Gfi1,Myc,Sdc4,Fgfr2,Pdgfa,Pdgfra,Fgf9,Nog,Jag1,Fgf8,Kcnk3,Hes1,Mafb,Maf,Nr4a3,Slc9a3r1,Bcl2l11,Wnt5a,Tgfb2,Dll1,Fgfr3,Gata3,Ccna2,Ntn1,Six1,Cux1,Slc4a7,Gli3,Lhx3,Anp32b,Alg10,Fzd3,Fzd6,Vangl2,Eya4,Hmx3,Hmx2,Pax2,Tcf15,Kcnq4,Grhl3,Osr1,Six4,Lgr5,Celsr1,Bmper,Wnt3a,Dvl3,Lrp10,Spry2,Ror2,Tfap2a,Ripor2,Sall1,Sobp,Fat4,Frem2,Chd7,Whrn,Ephb2,Osr2,Tbx18,Rdh10,Gsdme,Naglu,Tbx1,Scrib,Atg5,Tprn,…
19_Member	GO Biological Processes	GO:0043583	ear development	-13.0421	-10.5556	74/253	24225,24252,24388,24577,24771,25022,25266,25267,25444,25495,29146,29349,29553,29577,54264,54267,58853,59114,64547,64566,81809,84010,84489,85471,114494,114523,114634,116639,117955,140588,170671,170724,245960,266715,282581,289229,292172,293537,293538,293992,296272,298496,298555,298878,299138,299802,300128,300455,303181,303811,305880,306141,306782,306862,306934,307740,309860,310341,310418,312974,313…	Bdnf,Cebpa,Gfi1,Myc,Sdc4,Fgfr2,Pdgfa,Pdgfra,Fgf9,Nog,Jag1,Fgf8,Kcnk3,Hes1,Mafb,Maf,Nr4a3,Slc9a3r1,Bcl2l11,Wnt5a,Tgfb2,Dll1,Fgfr3,Gata3,Ccna2,Ntn1,Six1,Cux1,Slc4a7,Gli3,Lhx3,Anp32b,Alg10,Fzd3,Fzd6,Vangl2,Eya4,Hmx3,Hmx2,Pax2,Tcf15,Kcnq4,Grhl3,Osr1,Six4,Lgr5,Celsr1,Bmper,Wnt3a,Dvl3,Lrp10,Spry2,Ror2,Tfap2a,Ripor2,Sall1,Sobp,Fat4,Frem2,Chd7,Whrn,Ephb2,Osr2,Tbx18,Rdh10,Gsdme,Naglu,Tbx1,Scrib,Atg5,Tprn,…
19_Member	GO Biological Processes	GO:0048839	inner ear development	-11.18	-8.88648	65/226	24225,24252,24388,24771,25022,25266,25267,25444,29146,29349,29553,29577,54264,54267,58853,59114,64566,81809,84010,84489,85471,114494,114523,114634,116639,117955,140588,170671,170724,245960,266715,282581,289229,292172,293537,293538,293992,298496,298555,299138,299802,300128,300455,303181,303811,305880,306141,306782,306862,306934,309860,310341,310418,312974,313255,313633,315870,353316,360630,360737,…	Bdnf,Cebpa,Gfi1,Sdc4,Fgfr2,Pdgfa,Pdgfra,Fgf9,Jag1,Fgf8,Kcnk3,Hes1,Mafb,Maf,Nr4a3,Slc9a3r1,Wnt5a,Tgfb2,Dll1,Fgfr3,Gata3,Ccna2,Ntn1,Six1,Cux1,Slc4a7,Gli3,Lhx3,Anp32b,Alg10,Fzd3,Fzd6,Vangl2,Eya4,Hmx3,Hmx2,Pax2,Kcnq4,Grhl3,Six4,Lgr5,Celsr1,Bmper,Wnt3a,Dvl3,Lrp10,Spry2,Ror2,Tfap2a,Ripor2,Sobp,Fat4,Frem2,Chd7,Whrn,Ephb2,Tbx18,Gsdme,Naglu,Tbx1,Scrib,Atg5,Tprn,Dlx6,Rbpj
19_Member	GO Biological Processes	GO:0042471	ear morphogenesis	-9.12874	-6.98867	43/135	24388,24577,25022,25444,25495,29349,54264,58853,59114,64566,85471,114523,114634,266715,282581,289229,292172,293537,293538,293992,298496,298555,298878,299138,300128,303181,303811,306141,306782,306862,306934,307740,309860,312974,313255,313633,315039,315870,360630,360737,362938,500023,683470	Gfi1,Myc,Fgfr2,Fgf9,Nog,Fgf8,Mafb,Nr4a3,Slc9a3r1,Wnt5a,Gata3,Ntn1,Six1,Fzd3,Fzd6,Vangl2,Eya4,Hmx3,Hmx2,Pax2,Kcnq4,Grhl3,Osr1,Six4,Celsr1,Wnt3a,Dvl3,Spry2,Ror2,Tfap2a,Ripor2,Sall1,Sobp,Chd7,Whrn,Ephb2,Osr2,Tbx18,Naglu,Tbx1,Scrib,Dlx6,Gas1
19_Member	GO Biological Processes	GO:0042472	inner ear morphogenesis	-7.21635	-5.27997	35/113	24388,25022,25444,29349,54264,58853,59114,64566,85471,114523,114634,266715,282581,289229,293537,293538,293992,298496,298555,299138,300128,303181,303811,306141,306782,306862,306934,309860,312974,313255,313633,315870,360737,362938,500023	Gfi1,Fgfr2,Fgf9,Fgf8,Mafb,Nr4a3,Slc9a3r1,Wnt5a,Gata3,Ntn1,Six1,Fzd3,Fzd6,Vangl2,Hmx3,Hmx2,Pax2,Kcnq4,Grhl3,Six4,Celsr1,Wnt3a,Dvl3,Spry2,Ror2,Tfap2a,Ripor2,Sobp,Chd7,Whrn,Ephb2,Tbx18,Tbx1,Scrib,Dlx6
19_Member	GO Biological Processes	GO:0090102	cochlea development	-2.28162	-1.15235	14/56	29553,29577,64566,84489,85471,114494,114634,289229,293992,298555,303811,309860,315870,360737	Kcnk3,Hes1,Wnt5a,Fgfr3,Gata3,Ccna2,Six1,Vangl2,Pax2,Grhl3,Dvl3,Sobp,Tbx18,Tbx1
20_Summary	GO Biological Processes	GO:0021953	central nervous system neuron differentiation	-12.9967	-10.5175	66/213	24318,24680,24929,25022,25398,25509,25628,29227,29349,29375,29577,29619,54239,58822,59312,59323,64566,65193,81524,81527,81666,83467,84407,89830,114487,114502,124451,140588,170671,252833,259270,288457,288736,291023,292934,293976,296499,299117,300807,301252,303181,303586,305198,305719,306862,307740,308458,309095,310533,310552,311332,313633,314180,316052,316539,362280,364712,364910,365963,366214,499…	Drd2,Prkca,Ptger3,Fgfr2,Cacna1a,Pax6,Nkx2-1,Nfib,Fgf8,Uncx,Hes1,Btg2,Chrnb2,Csnk1e,Shank3,Erbb4,Wnt5a,Nkx6-1,Nf1x,Nrp2,Gnaq,Slit3,Cdh11,Ptch1,Wnt2,Pax3,Lhx5,Gli3,Lhx3,Gdf7,Zfp335,Gsx1,Foxn4,Id4,Dbx1,Dmrt3,Dlx2,Nin,Rora,Hsp90ab1,Wnt3a,Wnt9b,Prdm8,Fezf2,Tfap2a,Sall1,Sptbn4,Nkx6-2,Rapgef2,Sfrp2,Dll4,Ephb2,Mdga2,Eomes,Epha4,Tfap2c,Sox4,Sall3,Lhx8,Nkx2-2,Gdpd5,Lbx1,Pax7,Skor2,Mnx1,Nr2e1,Lef1
20_Member	GO Biological Processes	GO:0021953	central nervous system neuron differentiation	-12.9967	-10.5175	66/213	24318,24680,24929,25022,25398,25509,25628,29227,29349,29375,29577,29619,54239,58822,59312,59323,64566,65193,81524,81527,81666,83467,84407,89830,114487,114502,124451,140588,170671,252833,259270,288457,288736,291023,292934,293976,296499,299117,300807,301252,303181,303586,305198,305719,306862,307740,308458,309095,310533,310552,311332,313633,314180,316052,316539,362280,364712,364910,365963,366214,499…	Drd2,Prkca,Ptger3,Fgfr2,Cacna1a,Pax6,Nkx2-1,Nfib,Fgf8,Uncx,Hes1,Btg2,Chrnb2,Csnk1e,Shank3,Erbb4,Wnt5a,Nkx6-1,Nf1x,Nrp2,Gnaq,Slit3,Cdh11,Ptch1,Wnt2,Pax3,Lhx5,Gli3,Lhx3,Gdf7,Zfp335,Gsx1,Foxn4,Id4,Dbx1,Dmrt3,Dlx2,Nin,Rora,Hsp90ab1,Wnt3a,Wnt9b,Prdm8,Fezf2,Tfap2a,Sall1,Sptbn4,Nkx6-2,Rapgef2,Sfrp2,Dll4,Ephb2,Mdga2,Eomes,Epha4,Tfap2c,Sox4,Sall3,Lhx8,Nkx2-2,Gdpd5,Lbx1,Pax7,Skor2,Mnx1,Nr2e1
20_Member	GO Biological Processes	GO:0021872	forebrain generation of neurons	-6.07334	-4.2839	27/84	24318,24929,25022,25509,25628,29349,29375,29577,59312,59323,64566,81527,81666,83467,124451,140588,161452,296499,303181,305719,306862,307740,310533,362280,364910,365963,684085	Drd2,Ptger3,Fgfr2,Pax6,Nkx2-1,Fgf8,Uncx,Hes1,Shank3,Erbb4,Wnt5a,Nrp2,Gnaq,Slit3,Lhx5,Gli3,Lef1,Dlx2,Wnt3a,Fezf2,Tfap2a,Sall1,Rapgef2,Tfap2c,Sall3,Lhx8,Nr2e1
20_Member	GO Biological Processes	GO:0021879	forebrain neuron differentiation	-5.21826	-3.52321	23/72	24318,24929,25022,25509,25628,29349,29375,29577,59312,59323,64566,81527,81666,83467,124451,296499,305719,306862,307740,310533,362280,364910,365963	Drd2,Ptger3,Fgfr2,Pax6,Nkx2-1,Fgf8,Uncx,Hes1,Shank3,Erbb4,Wnt5a,Nrp2,Gnaq,Slit3,Lhx5,Dlx2,Fezf2,Tfap2a,Sall1,Rapgef2,Tfap2c,Sall3,Lhx8
20_Member	GO Biological Processes	GO:0021954	central nervous system neuron development	-3.81472	-2.36626	24/92	24318,24680,25022,29227,29349,29619,54239,64566,81527,81666,83467,84407,299117,301252,305198,305719,306862,308458,310533,313633,316539,364910,365963,684085	Drd2,Prkca,Fgfr2,Nfib,Fgf8,Btg2,Chrnb2,Wnt5a,Nrp2,Gnaq,Slit3,Cdh11,Nin,Hsp90ab1,Prdm8,Fezf2,Tfap2a,Sptbn4,Rapgef2,Ephb2,Epha4,Sall3,Lhx8,Nr2e1
20_Member	GO Biological Processes	GO:0021884	forebrain neuron development	-2.73175	-1.50176	12/40	24318,25022,29349,64566,81527,81666,83467,305719,306862,310533,364910,365963	Drd2,Fgfr2,Fgf8,Wnt5a,Nrp2,Gnaq,Slit3,Fezf2,Tfap2a,Rapgef2,Sall3,Lhx8

## Sheet: S4
Supplemental Table 4: Overlapping age-dependent DMRs significantly altered in the same direction (e.g., hypo- or hypermethylated) in both control and BDE-47 exposed animals between PND65 and PND120.
Gene	# CpGs	DMR position relative to gene (0 - in gene body)	PND120 vs PND65 control difference	PND120 vs PND65 exposed difference
LOC102550423	5	-106795	5.24081	8.41594
Col4a1	3	-53327	-31.6712	-35.2929
LOC102550768	3	-34411	12.9378	10.894
Sec61g	3	-32752	6.80315	8.91589
LOC294909	6	-23874	11.1801	8.16087
Blm	3	-21312	-6.6216	-6.15218
Cmip	3	-17199	18.1927	15.8951
Wbscr28	29	-16976	11.2075	9.00233
Nnat	4	-8121	13.1588	13.7227
Gng7	9	-4918	16.5625	8.5128
LOC103694283	3	-4101	19.4621	20.147
LOC103693462	4	-2132	12.2613	6.04615
LOC102546845	3	-201	-13.4402	-8.60937
Mapk13	3	-178	46.8332	31.9768
Tshz2	4	0	-12.8764	-25.086
LOC103693172	10	0	-20.4428	-24.2061
Ston2	8	0	-14.4809	-22.7119
LOC685950	3	0	-5.85404	-19.0415
Sh3glb1	6	0	-8.82396	-18.8454
Anks1b	3	0	-13.0378	-18.475
Rab20	3	0	-20.6576	-17.9304
LOC102552669	11	0	-7.55956	-17.8184
Pls1	10	0	-17.944	-13.78
Nlrc4	7	0	-8.11684	-12.6194
Slc8a1	5	0	-11.0776	-12.4704
Wnt3	5	0	-12.2333	-12.2723
LOC100910200	7	0	-9.97652	-11.5454
Htra4	6	0	-7.04897	-8.43157
Gpc6	13	0	-10.709	-8.07194
Acap1	27	0	8.01698	5.00246
Nectin4	5	0	5.44902	5.01759
Prmt9	4	0	17.4333	5.04932
Rarg	10	0	11.3717	5.05216
Camkk2	20	0	6.56432	5.05582
LOC102550673	74	0	8.30404	5.06483
Coq10a	5	0	11.3873	5.0671
Zar1l	107	0	7.25998	5.14147
Usp21	6	0	9.81603	5.15194
Mettl1	14	0	6.59763	5.20338
Rhbdf1	13	0	5.06887	5.20575
LOC102546433	30	0	9.76428	5.20781
Man2a1	3	0	6.69114	5.21319
Sp1	18	0	7.75152	5.36002
LOC100361319	267	0	7.82729	5.37704
Pld2	15	0	5.33959	5.38466
Acp5	5	0	24.4479	5.39164
Grifin	31	0	10.4442	5.41171
Bcat2	12	0	13.9752	5.42994
Plppr2	3	0	17.6539	5.49309
Plekhg2	3	0	10.9391	5.53858
LOC103691518	10	0	6.40086	5.83257
Zfp827	3	0	12.7558	5.91398
Rilp	14	0	12.136	5.91658
Hoxc8	12	0	7.9879	5.92143
Drc1	3	0	9.28811	5.9672
LOC100911068	6	0	7.92104	5.99154
Gosr1	6	0	10.3835	6.05895
Cnpy2	3	0	8.45996	6.16213
Zc3h4	3	0	24.2239	6.17987
Hint2	3	0	7.04368	6.2134
LOC103692524	8	0	10.7145	6.23323
Zfp628	21	0	7.64079	6.25822
Fam109a	11	0	12.7176	6.38546
Pak6	20	0	10.7929	6.44647
LOC103692141	6	0	8.35793	6.5711
Rpusd3	11	0	10.4243	6.67037
Stx4	6	0	15.5385	6.74036
LOC103693940	9	0	11.3067	6.74163
Rhob	5	0	11.9311	6.86445
Hnf1a	3	0	24.5653	6.86948
Gtf2f1	6	0	10.8228	6.90908
Ctdsp1	5	0	13.7127	6.96822
Fbxl19	14	0	11.2364	7.02809
Lamtor5	16	0	10.5239	7.22328
Cbx6	12	0	10.6026	7.29181
Aldoa	8	0	13.6003	7.3794
Tubb5	15	0	15.1412	7.49023
C2	5	0	15.8794	7.5445
Fam57b	12	0	9.94535	7.57439
Rlf	9	0	13.4716	7.64815
Hdac7	8	0	10.0585	7.70128
B4galt3	20	0	11.3511	7.7546
LOC103693479	19	0	9.3961	7.81941
Deptor	4	0	8.61478	8.01126
Fam193b	4	0	9.07113	8.04859
Armcx4	3	0	10.0315	8.05665
Wapl	10	0	9.85181	8.31174
Rnf151	3	0	10.8486	8.33377
Bcl2l12	46	0	8.12126	8.61148
Tpgs1	7	0	11.5413	8.68871
Bcam	3	0	14.3346	8.77059
LOC102556004	5	0	7.31818	8.782
Prc1	7	0	7.63964	8.79635
Cyhr1	5	0	10.7214	8.92469
Spry1	15	0	10.5174	8.95757
Tns3	27	0	9.51581	9.11535
Mast3	26	0	11.9939	9.21209
Clns1a	3	0	13.7006	9.21305
Nuak2	49	0	8.24934	9.24116
Wnt10b	8	0	12.277	9.39671
Tmem259	3	0	15.5955	9.40778
Tcf3	15	0	10.2472	9.48516
Wipf2	14	0	17.9745	9.57811
RGD1560648	9	0	9.29162	9.65901
Med26	12	0	13.6635	9.7059
Tut1	7	0	13.5983	9.83693
Ccar1	7	0	15.7414	9.90257
Hinfp	4	0	7.64617	9.92342
Exosc4	7	0	20.8736	10.1831
Rab38	5	0	13.9972	10.2656
Fiz1	14	0	16.4372	10.3533
Gys1	15	0	9.19217	10.458
Pard6b	33	0	14.1384	10.4666
Hectd3	11	0	9.50513	10.6961
Dnajc13	13	0	15.161	10.7172
Dyrk2	12	0	14.4543	11.0482
Hexim2	24	0	11.7975	11.2316
Ip6k2	7	0	17.0426	11.2756
Eml2	5	0	20.2734	11.4218
Il12rb1	10	0	10.5051	11.5025
Wnt10b	7	0	21.1029	12.1782
Creb3l2	6	0	15.7819	12.4388
Gabbr1	12	0	8.64102	12.4668
Cbx6	9	0	8.07355	12.8554
Tbx3	21	0	20.534	13.3661
Bbc3	16	0	13.8192	13.8794
LOC103692987	9	0	14.8484	14.2047
Nr0b2	10	0	18.5412	14.4957
Setd1b	33	0	11.6205	14.906
Glod5	3	0	11.635	15.2248
Dapk3	23	0	21.655	16.317
Kxd1	4	0	12.3084	16.942
Gltp	19	0	20.1273	17.888
LOC102553733	4	0	22.9509	18.7415
Fbxo41	10	0	21.4054	18.9738
Mex3a	25	0	25.6256	20.0188
Upp1	16	0	12.0752	21.3875
Tsc22d3	3	0	21.5475	22.5634
Adat3	34	0	28.6411	22.7241
LOC500956	22	0	25.6285	24.1117
Plekhh2	5	0	12.3409	26.5937
Setd1b	12	0	22.9692	27.6367
Lrrc8e	14	0	47.5456	42.2429
Itpr3	21	2284	14.8169	8.37235
Arid5a	4	4220	9.36811	10.824
LOC686150	7	4286	17.5817	14.0408
Efna2	3	5047	10.4542	11.6323
LOC102551503	21	5669	7.90093	6.38813
Exd2	4	18668	13.5297	19.3011
RGD1561808	5	18769	-15.7338	-9.40868
LOC681827	3	18839	6.24686	7.8487
Cnr1	3	36788	-10.9609	-5.89647
Hipk3	4	49627	-16.0749	-18.3076
Ftmt	22	335764	5.74827	6.43926

## Sheet: S5
Supplemental Table 5: Overlap between genes associated with significant age-dependent DMRs in control animals and gene-targets of miRNA and piRNA significantly differentially expressed between two age groups in control animals.
Overlap with genes - targets of miRNA	Overlap with genes - targets of piRNA
Arhgap12	Dcaf10
Gxylt1	Map6
Hectd2	Fndc3b
Six4	Hs3st3a1
Prtg	Clvs2
Epha4	Dab2ip
Armc8	Commd7
Hbp1	Kcnk10
Mier3	Ppp1r7
Rapgef2
Bcl2l11
Zfp512b
Plpp6
Zfp367
Sall1
Itga6
Phtf2
Elavl2
Synj1
Srsf1
Rgl1
Gnpda2
Stk39
Rap1a
Stk17b
Ntng1
Naa30
Rock2
Arih1
Luc7l3
Fbxl3
Mapk6
Col4a1
Hip1
Rdx
Bmp3
Usp24
Pdgfra
Sox4
Pcsk5
Appbp2
Vldlr
Rb1cc1
Klf3
Pde3b
Hook3
Dcaf6
Man2a1
Akap10
Rev3l
Abhd13
Btg2
Klhl29
Ipmk
Lats2
Cbln4
Tcf7l2
Azin1
Arid3b
Cmpk1
Fam45a
Rab33b
Sos1
Tmcc3
Tsg101
Ccng2
Zdhhc21
Rgma
Frmd6
Fcho2
Ptpn13
Ankib1
Sephs1
Irs1
Ubp1
Spire1
Slc30a4
Ppp1r15b
Ulk2
Zfp287
Ezh2
Sort1
Nup153
Wnk1
Ndfip2
Wdfy3
Col4a3bp
Bcl6
Per2
Errfi1
Pum2
Grid2
Dusp5
Spry2
Dcun1d4
Gas7
Stk40
Igf2bp2
Ago3
Abcb9
Wnt9b
Slc12a6
Topors
Arid1a
Rab11a
Nectin1
Ddhd1
Usp47
Polr3g
Ccne2
LOC100125364
Zfp91
Erlec1
Ybx3
Sall3
Galnt3
Ddit4
Ptp4a1
Tmem33
Nabp1
Pkd2
Mprip
Ckap4
Arid4b
Carmil1
Dll4
Trpm7
Epn2
Map3k8
Ap1s3
Slc12a2
Usp46
Tram1l1
Tnrc6a
Cdk14
Atp2c1
Edem1
Sim2
Tcf21
Nefh
Luzp1
Usp25
Mllt10
Crebzf
Jag1
G2e3
Ier5
Raph1
Wasf1
Gnai1
Lats1
Ing2
Ppm1d
Jade1
Usp28
Fam20c
Pdik1l
Ammecr1l
Btbd1
Slc12a5
Lhfpl2
Hnf1b
Cyp24a1
Rad21
Sema4c
Csmd1
Hmcn1
Tmem178b
Esrrg
Enpp2
Speg
Akirin1
Eif4enif1
Hnrnpu
Tspan5
Tmprss2
Limd2
Lipt2
B3gnt7
Aen
Efhd2
Brd3
Begain
Cbx2
Scyl3
Zdhhc23
Ppp4r3a
Nup210
Crem
Slc44a1
Plcb4
Cdc34
Pbx1
Sertad3
Slc35g2
Pthlh
Usp3
Klf9
Psd
Snx8
RGD1305455
Map3k2
Cep120
Dusp2
Osr1
Rtn4rl1
Adgrb3
Cdc37l1
Bcor
Prkca
Marveld2
Dgkz
Nr4a3
Zic5
Rbms1
Gskip
Tbpl1
Marcks
Ppp1r18
Arhgef3
Mex3b
Spen
Dll1
Pcgf5
Setd5
Katnbl1
Bnc2
Arf6
Paip1
Pip4k2a
Enc1
Epb41l3
Tnfrsf12a
Arfip1
Sp1
Brpf1
Ttc9
Ugp2
Ptpro
Rgs17
P3h3
Fzd10
Slc25a32
Ube2z
Epc1
Bbs7
Wasl
Ppp3r1
Krit1
Nfe2l2
Nol4
Lgalsl
Bnip3l
Usp42
Lpar1
Hipk1
Josd1
Kcnd3
Kbtbd2
Fam43a
Cggbp1
Dixdc1
Slc20a2
Ywhah
Erf
Ptpn12
Clcn3
Cdc42se2
Mycbp
Pbx2
Lypla1
Bdnf
Tpm1
Grhl3
Fn1
Rreb1
Pdzd8
Lin54
Tle3
Kcnk10
Rai1
Nfasc
Cpeb1
Sec61a2
Dsc2
Rai14
Foxb1
Becn1
Foxd1
Tmed2
Eya4
Taok2
Kcna6
Fam107a
Olig3
Vat1
Baalc
Gmppb
Car7
Cnot9
Tll1
Rad23b
Cd47
Tpbg
Mafk
Kif2a
Naf1
Lhx8
Fam210b
Gli2
Slc25a16
Pawr
Snai1
Eif4e
Slc25a25
Mtx1
Reck
Tfap2a
Fat3
Ascc3
Usp45
Btaf1
Plppr5
Dcaf7
Eif4a2
Fa2h
Ispd
B3gnt5
Qtrt2
Sptlc2
Mphosph9
RGD1305350
Mpped2
Kcnq5
Abhd17c
Zfp521
Shank2
Ash1l
Slc35f1
Polr3e
Ptprj
Dnajb1
Me1
Slc22a23
Mcfd2
Ppp3ca
Sacm1l
Mob4
Kif16b
Celsr3
Phf12
Fam131b
Nr3c2
Afdn
Mxd1
Zfyve1
Ap1ar
Plcl1
Dnajc6
Cep76
Dcaf10
Anks1b
Slc25a46
Pias4
Rassf3
Ccna2
Ube2g1
Cep162
Vezf1
Kdm2b
Tbx18
Hmgcr
Cul1
Gdap2
Atp1b3
Morc3
Mb21d2
Nrg1
Etnk1
Utp11
Casp7
Ebf3
Akap12
Nck2
Nuak2
Ralb
Dhx15
Id4
Elavl4
Wdr20
Ywhab
Zfp329
Prc1
Fam102b
Ctsl
Gata4
Wee1
Ubtf
Ube2ql1
Jmjd1c
Donson
Tmem150a
Ncam2
Rnf139
Usp1
Slain2
Rtf1
Gpbp1
Cdh2
Shisa7
Psme4
Sec14l2
Lactb
Mapk13
Eif1ad
Nrm
LOC100294508
Asic1
Smurf1
Tor2a
Map3k11
Ppme1
Scube1
Itga7
Scaf8
Elk4
Nampt
Sorcs3
Inhbb
Cttnbp2nl
Tmed5
Ube2e3
Rnf14
Fam84a
Ganab
Syde2
Axin2
Mta2
RGD1359108
Zfp746
Ddah1
Afap1l2
Yaf2
Sema6b
Erlin1
Stk10
Rab32
Adra2a
Bnc1
Fst
Abl1
Cables1
Kxd1
Gltp
Irx4
Nedd4
Haus4
Mtdh
Siah2
Fam110b
Apaf1
Ppp1r12a
Tmem200a
Lrrc8d
Nkx2-2
Wdr82
Fbxo42
Lpar3
Ubn1
Slc6a9
Tsc22d3
Rela
Ankfy1
Kcnj1
Lemd3
Serf2
Sox13
Man1a1
Cxadr
Zbtb44
Agfg2
Trim3
Isoc1
Osbpl5
Stk11
Stradb
Cdh11
Tsc22d1
Mfsd14b
Pex12
Dnaja1
Hoxd1
Mtor
Dynll2
Golph3
Fam91a1
Rhobtb1
Phlda1
Cyp26b1
Spsb4
Nacc2
Adgrl2
Pax9
Txnrd1
Prelid3b
Syf2
Sfpq
Rtn1
Tcf3
Hes1
Sfrp2
Gpalpp1
Fermt2
Gtf2i
Rhot1
Cnbp
Wnt5a
Nin
Fam174a
Eif3el1
Arntl
Fam204a
Slc25a33
Gadd45a
Myef2
Traf6
Kif5c
Cabp7
Zbtb6
Kpnb1
Relt
Runx1t1
Svil
Eaf1
Med12l
Fat1
Zmynd11
Id2
Pde5a
Nog
Car8
Chmp1a
Wac
Adamts7
Rab18
Slc9a2
Rnf167
Vps37a
Wdr1
Bet1l
Apc2
Sdc1
Ppara
Hic1
Rhob
Ddx58
Rnf19a
Spata1
Zfp36l1
Slit3
Hnrnpr
Fgd4
Ankrd13a
Cops2
Fbxo9
Arhgef2
Stxbp3
Phf13
Pitx2
Slc22a17
Tnrc18
Eif2ak2
Rnf144b
Adcyap1
Appl2
Kdm2a
Wipi2
Ppp1r14c
Gja3
Dbndd2
Ptbp1
Nckap1
Man2a2
Kifc3
Fam53a
Hnrnpf
Usp13
Meis2
Dscaml1
Cited2
Colec12
Stat5a
Six1
Zic2
Tmem165
Psmd11
Pcbp2
Jakmip1
Slc38a3
Trak1
Kdsr
Syt11
Bicdl1
Wwc2
Sox17
Elf2
Dennd5a
Sesn1
Jun
Tubb5
Cbr4
Rps6kb1
Grin2a
Mdfic
Zfp655
Ttc14
Mad2l1bp
Dock1
Grk5
Dhx32
Igsf11
Aftph
Rab34
Lgr4
Mdga2
Smad7
Dpysl2
Clstn1
Rbpj
Fam19a5
Cd81
Mtf2
Lbh
B3galt5
Wdtc1
Ldb3
Tspan9
Csf1
Sorcs2
Clta
Wt1
Agap1
Serpinh1
Ywhaz
Tril
Ggnbp2
Drgx
Dagla
Zmiz1
Grb2
Abcd3
Gatad2a
Cks2
Crhr1
Gnpda1
Sorbs3
Cbln2
Pomgnt1
Drd2
Dazap2
Tbca
Trip12
Hnrnpk
Zfp830
Napa
Shroom2
Mios
Golim4
Tmem30a
Pou4f2
Vps33b
Cnksr3
Eri1
Hif1a
Zfp503
Spata6
Nup205
H2afy2
Wdr43
Slc17a5
Tomm70
Upf2
Tstd2
Nip7
Eif4g3
Ampd3
Zfp330
Kcnk3
Fbxl7
Mdm2
Zhx3
Il4r
Grm7
Svbp
Glb1
LOC257650
Kdm5a
Erbb2
Map3k10
Cacybp
Ints6
Ehd1
Adra2b
Fgfr3
Scarf2
Foxn4
Gpr150
Pcdhgc3
Ptpa
Dpm2
Shank3
Slain1
Xpo6
Smim14
Prox1
Ttc39b
Tpm3
Tppp
Upf3a
Trib1
Prkcd
Bmper
Pax3
Tmem178a
E2f7
Rspo2
Angptl4
Cmpk2
Ctdspl
Dnajc21
Phax
Ddx5
Ppp2ca
Tcerg1
Lmo1
Lpp
Lasp1
Zdhhc7
Amd1
Rabgef1
Ror2
Gch1
Cap1
Myo1e
Idh2
Zfp451
Lsm14a
C2cd5
Prkch
Carm1
Kctd13
Nppc
Nek6
Ubxn8
Car2
Lamp1
Stk35
Cab39
Ep400
Pdxp
Lrrfip1
Zfp398
Entpd4
Ube2t
Slc7a5
Rassf5
S1pr3
Hibadh
Sdc4
Elfn1
Itpka
Tgs1
Foxc1
Fat4
Vav2
Pcdh9
Rnf38
Far1
MGC94207
Cds1
Map3k9
Sik1
Tgfa
Mmp15
Cldnd1
Trpc3
Ltbp1
Ap5z1
Sdf2l1
Tfap2b
Riok3
Mblac1
Dusp7
Agl
Mcemp1
Mturn
Rhbdf2
Arhgef7
Aldh6a1
Mettl9
Pxdc1
Dse
Oxsr1
Rfesd
Ranbp17
Klf7
Ggps1
Slc31a2
Cnnm2
Mthfd2
Slc39a14
Mtss1
Akr7a2
Wwp1
Ptprn2
Tgfbr2
Maea
Itpkc
Mapk14
Shc2
Zfp423
Pcgf3
Txndc5
Nfib
Fam168b
Mbtps1
Otx1
Etv5
Phf19
Pax6
Megf8
Reep1
Hnrnpul1
Akirin2
Pwwp2b
Ybx1
Hmx3
Tfap4
Elac1
Wnt3a
Zbtb46
Atp11a
Helz
Znrf2
Cdk6
Kdm5b
Rbm6
Agpat5
Acap2
Cnot3
Il11
Zfp362
Adcy5
Nxt1
Scoc
Cbfa2t3
Cpsf7
Efl1
Setd7
Ccno
Pou3f3
Trmt1
Cdyl
Efr3a
Fzd6
Cdk12
Fam3c
Il17rb
Hexb
Csrnp1
Dpp8
Piezo1
Dgki
Cebpa
Psmc6
Camkmt
Rad54l2
Tbc1d9
Ank3
Rnf152
Hp1bp3
Ripply3
Tmem106b
Mettl24
Foxo1
Usp6nl
Dtwd2
Crls1
Fgfr2
Yrdc
Spopl
Klhl9
Nr4a1
Tead3
Tmtc3
Denr
Rab28
Tor3a
Ndrg4
Six6
Lrif1
Usp44
Tmem114
Ube2d2
Zic4
Glul
Sumo1
Pcyt2
Hsph1
Prdx2
Unc119b
Prss23
Icmt
Glg1
Tmem132e
Mrpl52
Tprn
Cers5
Ptges3
Phlda2
Dda1
Zfat
Nuak1
Map1lc3a
Nanp
Tcea2
Naaa
Uck1
Hoxb9
Smg7
Taf3
Foxq1
Xkr7
Ppm1e
Sirpa
Syngap1
Prkab2
Wipi1
Ip6k1
Shank1
Tnpo3
Glis2
Rhbdl3
Kcnq2
Anapc15
Pim1
Tob2
Dlgap3
Ciz1
Snx19
Zranb2
Tcf20
Ythdf1
Xbp1
Prr7
Gabbr2
Nemf
Cdh3
Stxbp1
Ylpm1
Rbm22
Pcid2
Ppp1r7
Tcf7l1
Armc7
Itgb4
Dapk1
Lrrc38
Nkx6-1
Arpc5l
Ahsa2
Trim14
Lamp2
Plxna2
Asf1a
Yeats2
Pja2
Phlpp1
Coq10a
Agap2
Nfatc1
Mark2
Alx4
Unc119
Gtpbp3
Dhx33
Slc17a7
Rgs7bp
Thrb
Myc
P4ha1
Slc25a37
Kif26b
Lad1
Papola
Vwc2
C2cd2l
Tomm34
Etf1
Trib2
Egr4
Nectin2
Pigh
Fam160b2
Chst5
Igf2bp1
Tp53i11
Adgre5
Ly6e
Naa40
Ubash3b
Ky
Fjx1
Elac2
Dcxr
Lrp4
Sipa1l2
Fxr2
Synm
Prkag2
Dlx3
Plpp3
Zmpste24
Ran
Hrk
Ptch2
Chrna4
Chrm3
Pycr2
Terf2ip
Tmem9b
Nxph1
Abcg1
Snrpb2
Slc33a1
Brcc3
Rnf151
Sh3gl1
En2
Cnr1
Dnajc8
Rpl15
Fbxl22
C1ql1
Cspp1
Ccnl2
Usp15
Adss
Carhsp1
Efhd1
Snx13
RGD1307461
